# Supplementary material for: Topical ABT-263 treatment reduces aged skin senescence and improves subsequent wound healing
Source: publisher site journal article supplement (doi:10.18632/aging.206165), 2024-12-03
Supplement: Supplementary file [file aging-v16-206165-supplementary-material-SD1.pdf]

## SUPPLEMENTARY FIGURES

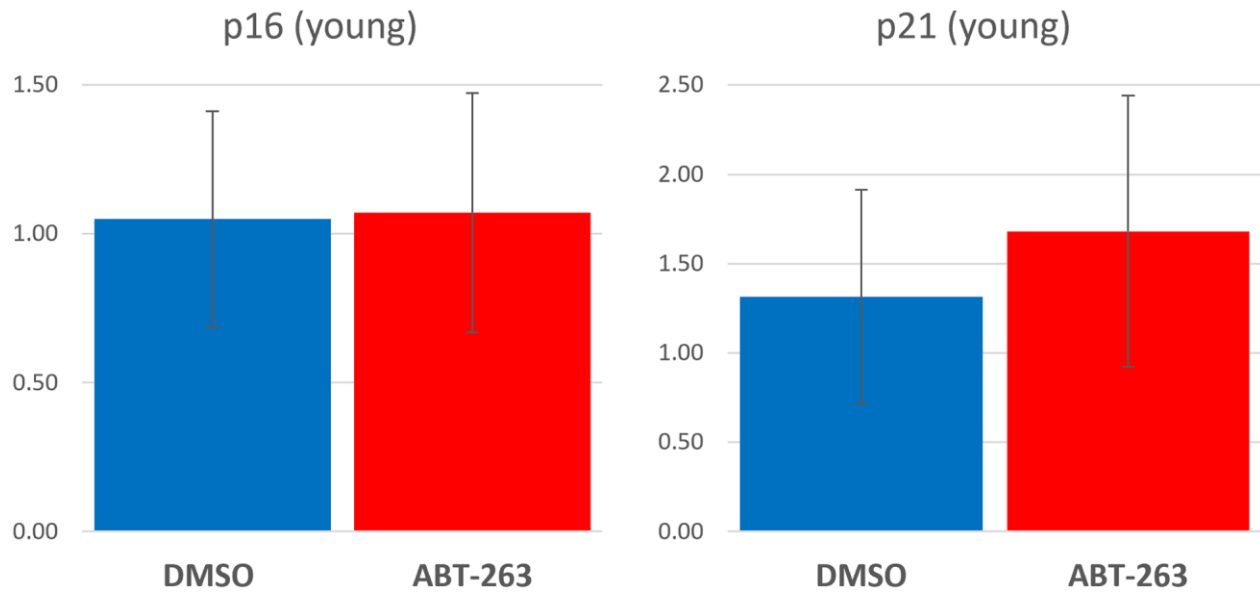

**Supplementary Figure 1. Topical ABT-263 does not alter p16 or p21 expression in young mouse skin.** p16 and p21 gene expression relative to  $\beta$ -actin after 5 days of ABT-263 (N=5) vs. DMSO (N=5), 2-month-old mice. t-test, \*  $p < 0.05$ .

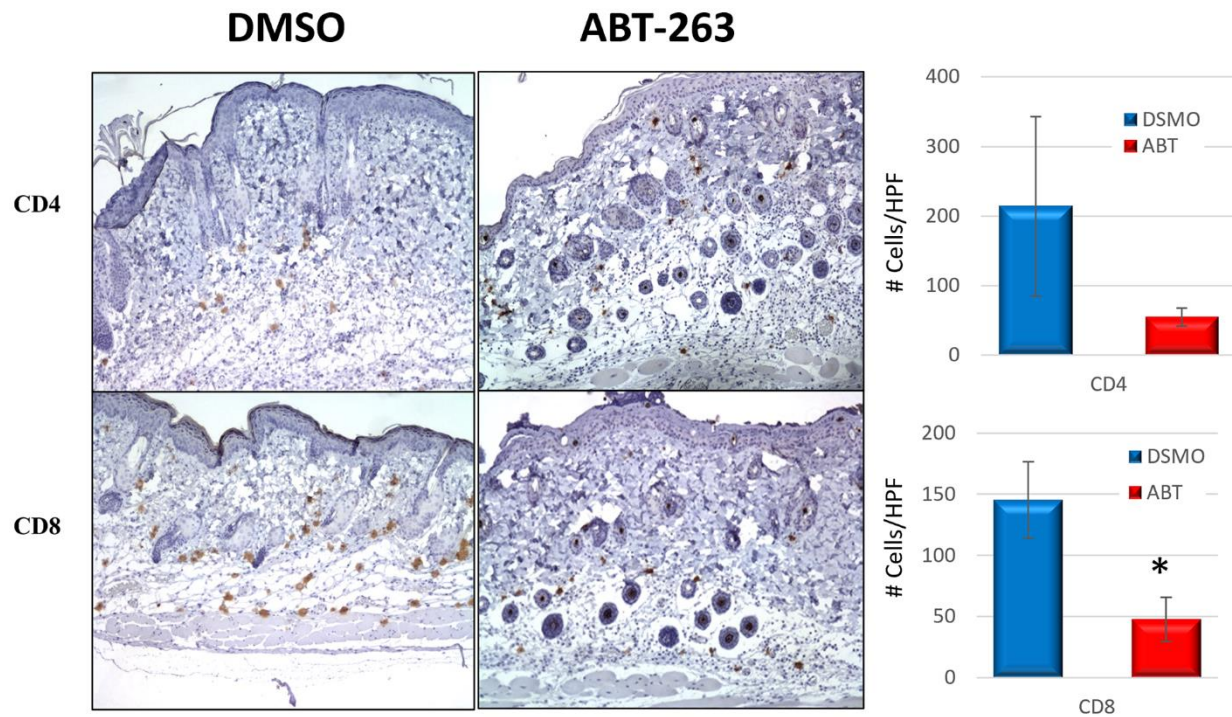

**Supplementary Figure 2. Topical ABT-263 decreased CD4 and CD8 cell infiltration in aged skin.** CD4 and CD8 staining of skin after 5 days of ABT-263 (N=5) vs. DMSO (N=5), 24-month-old mice. Number of cells/high-powered field. t-test, \*  $p < 0.05$  significance level.

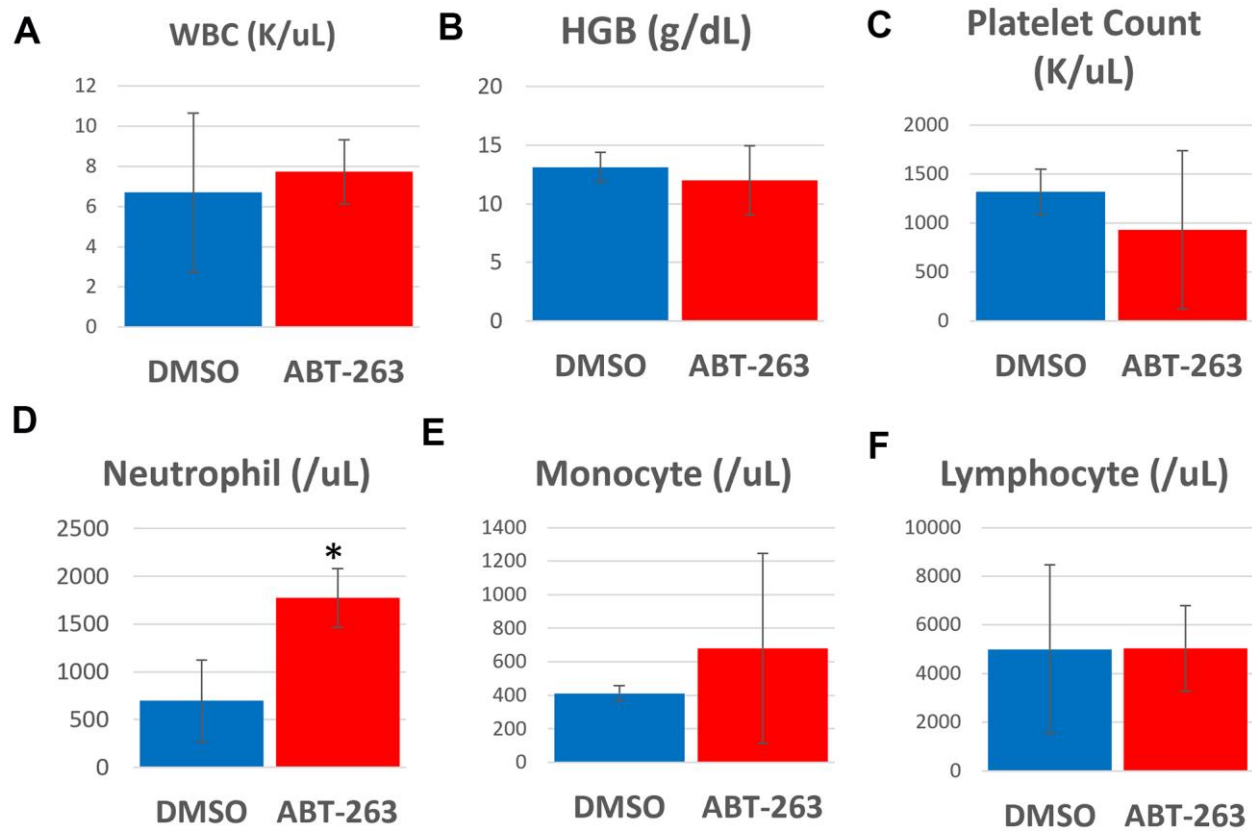

**Supplementary Figure 3. Topical ABT-263 effects on systemic blood counts in aged mice.** (A) White blood cell count. (B) Hemoglobin. (C) Platelet count. (D) Neutrophil count. (E) Monocyte count. (F) Lymphocyte count. Blood was obtained one day after 5 days of topical treatment with ABT-263 (N=3) vs. DMSO (N=2) in 24-month-old mice. t-test, \* p<0.05 significance level.
