# Supplementary material for: Topical ABT-263 treatment reduces aged skin senescence and improves subsequent wound healing
Source: Aging (Albany NY). 2024 Dec 3;17(1):16–32. doi: 10.18632/aging.206165 (PMC11810067; doi:10.18632/aging.206165)
Supplement: Supplementary Table 1 [file aging-17-206165-s002.xlsx]

## Sheet: Statistical analysis
Supplementary Table 1. Gene-level analysis results.
					ABT-263 vs DMSO				Counts (colors assigned by VST expression, scaled across all samples in each row)							VST expression (colors assigned by VST expression, scaled across all samples in each row)
Ensembl Gene ID	Mouse Entrez Gene ID(s)	Symbol	Description	Biotype	fold change	Wald statistic	p	FDR q	DMSO 480	DMSO 481	DMSO 482	DMSO 483	ABT-263 476	ABT-263 477	ABT-263 478	DMSO 480	DMSO 481	DMSO 482	DMSO 483	ABT-263 476	ABT-263 477	ABT-263 478
ENSMUSG00000091421		Gm4202	predicted gene 4202	processed_pseudogene	6.48342	11.6408	2.55712e-31	3.91815e-27	61	72	55	63	440	600	1014	6.55251	6.7517	6.68501	6.5936	8.90458	8.81347	9.29645
ENSMUSG00000024327	14977	Slc39a7	solute carrier family 39 (zinc transporter), member 7	protein_coding	7.09484	9.76122	1.65149e-22	1.68699e-18	37	54	34	35	333	372	717	6.03483	6.43405	6.17175	5.9861	8.52641	8.17154	8.81999
ENSMUSG00000058126		Tpm3-rs7	tropomyosin 3, related sequence 7	protein_coding	4.17151	9.66223	4.36265e-22	3.34234e-18	255	267	206	182	1302	1519	1764	8.31185	8.38996	8.3245	7.87565	10.4187	10.104	10.0705
ENSMUSG00000082016		Pgam1-ps2	phosphoglycerate mutase 1, pseudogene 2	processed_pseudogene	11.7033	9.49722	2.15565e-21	1.3212e-17	17	12	6	7	148	187	268	5.36189	5.1227	4.82993	4.79554	7.47063	7.29375	7.52512
ENSMUSG00000080935		Got2-ps1	glutamatic-oxaloacetic transaminase 2, mitochondrial, pseudogene 1	processed_pseudogene	5.94828	9.3104	1.2735e-20	6.50439e-17	120	162	85	158	886	977	2032	7.34272	7.73555	7.19376	7.69403	9.87585	9.48558	10.27
ENSMUSG00000114251		Tmed10-ps	transmembrane p24 trafficking protein 10, pseudogene	processed_pseudogene	3.15223	9.18971	3.93884e-20	1.72437e-16	197	150	168	187	643	954	1151	7.97189	7.63751	8.05506	7.91075	9.42791	9.45243	9.47241
ENSMUSG00000063902		Gm7964	predicted gene 7964	processed_pseudogene	2.79605	8.89382	5.90425e-19	2.0104e-15	480	565	434	444	1572	2144	2975	9.17058	9.4138	9.33958	9.07014	10.686	10.5915	10.8106
ENSMUSG00000075312		Gm13597	predicted gene 13597	processed_pseudogene	3.78048	8.86021	7.98669e-19	2.44752e-15	67	66	48	70	319	363	465	6.6564	6.65365	6.53415	6.71128	8.46869	8.13924	8.23738
ENSMUSG00000024331	13506	Dsc2	desmocollin 2	protein_coding	5.94189	8.84346	9.27961e-19	2.58522e-15	200	99	96	183	1126	1214	1804	7.9916	7.12403	7.34241	7.88274	10.2134	9.78899	10.1021
ENSMUSG00000079884		Gm10698	predicted gene 10698	processed_pseudogene	5.3222	8.81899	1.15492e-18	2.94937e-15	73	118	89	104	648	643	1252	6.75308	7.33751	7.24963	7.1743	9.43868	8.90797	9.58962
ENSMUSG00000036256	29817	Igfbp7	insulin-like growth factor binding protein 7	protein_coding	5.78162	8.6833	3.84457e-18	8.98472e-15	1478	1284	1143	1610	11954	7723	18807	10.7499	10.5679	10.7013	10.8787	13.5933	12.4231	13.4536
ENSMUSG00000022892	11820	App	amyloid beta (A4) precursor protein	protein_coding	2.76938	8.67218	4.23921e-18	8.98472e-15	2456	2781	1937	2530	7994	9666	15650	11.474	11.6698	11.4533	11.5237	13.0143	12.7455	13.1891
ENSMUSG00000083287		Gm13502	predicted gene 13502	processed_pseudogene	8.78464	8.668	4.39781e-18	8.98472e-15	22	17	14	24	168	212	485	5.56648	5.37144	5.38378	5.644	7.63011	7.44879	8.29329
ENSMUSG00000026043	12825	Col3a1	collagen, type III, alpha 1	protein_coding	7.67808	8.65737	4.82758e-18	9.24632e-15	15702	8155	9560	11621	102815	84427	249866	14.1396	13.2144	13.746	13.7134	16.6952	15.8674	17.1823
ENSMUSG00000090231	14962	Cfb	complement factor B	protein_coding	54.0536	8.51003	1.73885e-17	3.06428e-14	5	7	1	3	359	100	561	4.6266	4.79955	4.15842	4.41971	8.62784	6.56439	8.48786
ENSMUSG00000099397		Gm7809	predicted gene 7809	processed_pseudogene	9.27043	8.45156	2.87431e-17	4.40417e-14	44	32	21	13	287	353	636	6.20711	5.90836	5.71705	5.17181	8.32733	8.10248	8.65711
ENSMUSG00000082319		Actr3-ps	actin related protein 3, pseudogene	processed_pseudogene	4.64413	8.40501	4.27843e-17	5.95966e-14	211	250	121	165	1217	1141	1789	8.06161	8.30223	7.63177	7.74942	10.3232	9.70215	10.0903
ENSMUSG00000021866	11744	Anxa11	annexin A11	protein_coding	6.09929	8.35993	6.27559e-17	8.36154e-14	107	171	104	172	956	954	2353	7.20259	7.80492	7.44153	7.80275	9.98272	9.45243	10.4776
ENSMUSG00000082454		Gm12183	predicted gene 12183	processed_pseudogene	4.68544	8.35084	6.7782e-17	8.65492e-14	123	187	93	125	721	826	1527	7.37318	7.92051	7.30338	7.39941	9.58738	9.25257	9.86756
ENSMUSG00000069920	97440	B3gnt9	UDP-GlcNAc:betaGal beta-1,3-N-acetylglucosaminyltransferase 9	protein_coding	3.93626	8.25273	1.54813e-16	1.8977e-13	57	75	59	54	308	355	527	6.47868	6.79827	6.76443	6.42601	8.42165	8.10991	8.40405
ENSMUSG00000117813		Gm5823	predicted gene 5823	processed_pseudogene	5.20549	8.11222	4.97041e-16	5.61271e-13	41	48	23	30	204	269	448	6.13595	6.30962	5.79807	5.84162	7.87884	7.74972	8.18809
ENSMUSG00000030865	70261	Chp2	calcineurin-like EF hand protein 2	protein_coding	5.7147	7.99922	1.25212e-15	1.23778e-12	49	35	40	47	239	323	699	6.31801	5.99331	6.33889	6.27996	8.08525	7.9862	8.78535
ENSMUSG00000102918	93706	Pcdhgc3	protocadherin gamma subfamily C, 3	protein_coding	13.6325	7.98757	1.37627e-15	1.31799e-12	20	16	7	32	324	221	708	5.4887	5.32579	4.91713	5.90133	8.48957	7.50072	8.80277
ENSMUSG00000027694		Gm8325	predicted pseudogene 8325	transcribed_processed_pseudogene	4.62215	7.8746	3.41839e-15	2.99304e-12	41	36	18	31	155	247	319	6.13595	6.02046	5.58497	5.87182	7.52849	7.64094	7.74602
ENSMUSG00000111686		Rab7-ps1	RAB7, member RAS oncogene family, pseudogene 1	processed_pseudogene	7.23779	7.82985	4.88465e-15	4.15805e-12	43	33	28	16	306	266	487	6.1838	5.93729	5.98102	5.32019	8.41293	7.73536	8.29876
ENSMUSG00000082536		Gm13456	predicted gene 13456	processed_pseudogene	3.45888	7.73701	1.01781e-14	7.60752e-12	1868	2183	1390	1416	7807	7789	13422	11.0832	11.3236	10.9797	10.6961	12.9803	12.4353	12.9682
ENSMUSG00000045817	12193	Zfp36l2	zinc finger protein 36, C3H type-like 2	protein_coding	2.88255	7.71589	1.20145e-14	8.76632e-12	622	791	509	613	2072	2663	4395	9.53005	9.88393	9.56128	9.51679	11.0791	10.8996	11.3669
ENSMUSG00000033124	245860	Atg9a	autophagy related 9A	protein_coding	5.50489	7.62108	2.51552e-14	1.64018e-11	58	104	51	85	428	513	1138	6.49751	7.18339	6.60081	6.93444	8.86678	8.60091	9.4566
ENSMUSG00000024538	19038	Ppic	peptidylprolyl isomerase C	protein_coding	2.4732	7.58748	3.26183e-14	2.03998e-11	599	527	484	602	1629	1989	3189	9.47757	9.31718	9.4911	9.49157	10.7366	10.4851	10.9094
ENSMUSG00000006169	216705	Clint1	clathrin interactor 1	protein_coding	2.25512	7.56773	3.79817e-14	2.3279e-11	631	556	474	608	1470	1970	2928	9.55007	9.39149	9.46204	9.50538	10.5908	10.4715	10.7879
ENSMUSG00000078249	111241	Hmga1b	high mobility group AT-hook 1B	protein_coding	3.08541	7.56436	3.89791e-14	2.34218e-11	202	209	139	133	587	937	1086	8.00458	8.06562	7.80894	7.47661	9.30146	9.42743	9.39159
ENSMUSG00000026042	12832	Col5a2	collagen, type V, alpha 2	protein_coding	5.61986	7.54006	4.69769e-14	2.76848e-11	1046	554	743	1060	5714	5083	13320	10.2598	9.38649	10.0917	10.2858	12.5317	11.8231	12.9572
ENSMUSG00000079487	59024	Med12	mediator complex subunit 12	protein_coding	5.4321	7.52288	5.35842e-14	3.09828e-11	38	44	26	24	201	233	468	6.06084	6.21992	5.91086	5.644	7.85968	7.56715	8.24591
ENSMUSG00000024421	16774	Lama3	laminin, alpha 3	protein_coding	6.22641	7.51288	5.78405e-14	3.16522e-11	158	205	104	131	1716	1084	1392	7.68758	8.0403	7.44153	7.4577	10.8106	9.63051	9.7378
ENSMUSG00000094685		Gm5900	predicted pseudogene 5900	processed_pseudogene	5.09711	7.47402	7.77802e-14	3.97263e-11	38	44	21	46	240	232	457	6.06084	6.21992	5.71705	6.25776	8.09073	7.56173	8.2144
ENSMUSG00000044285		Ubb-ps	ubiquitin B, pseudogene	transcribed_processed_pseudogene	3.82365	7.41239	1.24044e-13	6.03384e-11	237	287	182	224	1189	1011	2160	8.21468	8.48676	8.1603	8.14685	10.2903	9.53323	10.3564
ENSMUSG00000117822		Eef1a1-ps1	eukaryotic translation elongation factor 1 alpha 1, pseudogene 1	processed_pseudogene	3.24554	7.34327	2.08437e-13	9.67811e-11	136	168	109	141	534	596	1108	7.49817	7.78217	7.50016	7.54984	9.17061	8.80435	9.41945
ENSMUSG00000084260		Gm12844	predicted gene 12844	processed_pseudogene	3.07566	7.31235	2.62512e-13	1.12414e-10	130	138	97	94	473	532	709	7.44184	7.53226	7.35518	7.05313	9.00366	8.65008	8.8047
ENSMUSG00000082691		Dynlt1-ps1	dynein light chain Tctex-type 1, pseuodogene 1	processed_pseudogene	2.64662	7.29483	2.99047e-13	1.25538e-10	337	323	245	240	976	1169	1557	8.68654	8.6461	8.55685	8.23805	10.0118	9.73608	9.89488
ENSMUSG00000070720	623230	Tmem200b	transmembrane protein 200B	protein_coding	9.60672	7.26119	3.83711e-13	1.58903e-10	8	12	7	19	110	132	322	4.86588	5.1227	4.91713	5.45189	7.10747	6.87809	7.75801
ENSMUSG00000024952	56613	Rps6ka4	ribosomal protein S6 kinase, polypeptide 4	protein_coding	3.53108	7.23673	4.59627e-13	1.85332e-10	586	375	302	307	1542	2557	2724	9.44705	8.849	8.84056	8.56731	10.6586	10.8418	10.6853
ENSMUSG00000026727	20163	Rsu1	Ras suppressor protein 1	protein_coding	2.66673	7.18655	6.64498e-13	2.57766e-10	233	287	178	293	858	994	1350	8.19217	8.48676	8.13101	8.50446	9.83079	9.5096	9.69492
ENSMUSG00000040078		Ptges3-ps	prostaglandin E synthase 3, pseudogene	processed_pseudogene	5.66554	7.1794	7.00176e-13	2.68211e-10	49	99	49	73	509	403	967	6.31801	7.12403	6.55672	6.75884	9.10451	8.27754	9.23077
ENSMUSG00000096108		Ighv11-2	immunoglobulin heavy variable V11-2	IG_V_gene	6.80775e+07	7.16685	7.67404e-13	2.83339e-10	0	0	0	0	4132	3	0	3.67762	3.67762	3.67762	3.67762	12.0664	4.26132	3.67762
ENSMUSG00000016024	16803	Lbp	lipopolysaccharide binding protein	protein_coding	4.56193	7.13465	9.70323e-13	3.50022e-10	1039	545	730	843	5378	3997	8032	10.2504	9.36375	10.0669	9.96283	12.4446	11.4791	12.2305
ENSMUSG00000090124	394432	Ugt1a7c	UDP glucuronosyltransferase 1 family, polypeptide A7C	protein_coding	22.4865	7.11592	1.11167e-12	3.91575e-10	6	6	6	0	165	86	240	4.71362	4.71989	4.82993	3.67762	7.60729	6.4013	7.38755
ENSMUSG00000018001	19159	Cyth3	cytohesin 3	protein_coding	2.43802	7.10322	1.21884e-12	4.24448e-10	492	423	394	536	1509	1646	2311	9.20468	9.01388	9.20574	9.33023	10.6279	10.2173	10.4521
ENSMUSG00000024659	16952	Anxa1	annexin A1	protein_coding	2.11743	7.07455	1.4993e-12	5.10511e-10	8161	7166	5730	6171	17852	23954	28716	13.1974	13.0284	13.0093	12.8027	14.1709	14.0516	14.063
ENSMUSG00000012428	117167	Steap4	STEAP family member 4	protein_coding	6.59958	7.02744	2.10353e-12	6.93148e-10	340	282	236	421	3889	1619	4164	8.69856	8.46316	8.50647	8.99706	11.9795	10.194	11.2898
ENSMUSG00000046993		Gm5637	predicted pseudogene 5637	processed_pseudogene	4.32493	6.96591	3.26288e-12	1.03084e-09	171	103	107	120	895	677	960	7.78875	7.17171	7.477	7.34895	9.89005	8.97854	9.22073
ENSMUSG00000059195		Gm12715	predicted gene 12715	processed_pseudogene	3.40113	6.92421	4.3843e-12	1.34357e-09	887	652	508	542	3339	3137	3901	10.0273	9.6133	9.55854	9.34566	11.761	11.1331	11.1967
ENSMUSG00000021116	13665	Eif2s1	eukaryotic translation initiation factor 2, subunit 1 alpha	protein_coding	2.20989	6.85837	6.96505e-12	2.09259e-09	497	492	441	575	1408	1641	2398	9.21865	9.22206	9.36177	9.42773	10.5296	10.213	10.5044
ENSMUSG00000031591	11886	Asah1	N-acylsphingosine amidohydrolase 1	protein_coding	3.62263	6.83557	8.16789e-12	2.38386e-09	311	344	316	349	1885	1331	2512	8.57795	8.73151	8.90246	8.7409	10.9443	9.91811	10.5703
ENSMUSG00000102550		Gm8276	predicted gene 8276	processed_pseudogene	6.10406	6.82133	9.02043e-12	2.60784e-09	28	42	15	16	220	206	309	5.77452	6.17275	5.43727	5.32019	7.97689	7.41309	7.70531
ENSMUSG00000062203	14852	Gspt1	G1 to S phase transition 1	protein_coding	1.94661	6.79159	1.10908e-11	3.08979e-09	873	827	627	788	1713	2443	3377	10.0049	9.94646	9.85299	9.86804	10.8081	10.777	10.991
ENSMUSG00000031871	12562	Cdh5	cadherin 5	protein_coding	3.81751	6.76102	1.37022e-11	3.65133e-09	618	340	435	603	2906	2460	3701	9.52106	8.71563	9.34277	9.49388	11.5622	10.7868	11.1216
ENSMUSG00000021876	58809	Rnase4	ribonuclease, RNase A family 4	protein_coding	2.45138	6.73328	1.6588e-11	4.30795e-09	1889	1666	1547	2046	5756	5877	9860	11.0992	10.9381	11.1322	11.2203	12.5422	12.0311	12.5249
ENSMUSG00000033213	433470	AA467197	expressed sequence AA467197	protein_coding	15.7251	6.69664	2.1327e-11	5.27069e-09	68	43	49	66	2172	309	1308	6.67298	6.19654	6.55672	6.64525	11.1463	7.92853	9.65073
ENSMUSG00000005982	74763	Naa60	N(alpha)-acetyltransferase 60, NatF catalytic subunit	protein_coding	2.16366	6.68525	2.30527e-11	5.60675e-09	514	467	380	488	1154	1488	2339	9.26516	9.15006	9.15579	9.20039	10.2481	10.075	10.4691
ENSMUSG00000025922		Rpl7-ps8	ribosomal protein L7, pseudogene 8	processed_pseudogene	2.68914	6.66398	2.66505e-11	6.43076e-09	180	196	163	169	567	652	1164	7.85482	7.98165	8.01553	7.78014	9.25347	8.92699	9.48804
ENSMUSG00000083892		Gm1848	predicted gene 1848	processed_pseudogene	2.82466	6.6401	3.13476e-11	7.3896e-09	74	75	67	62	210	320	460	6.76857	6.79827	6.91094	6.57594	7.9164	7.97404	8.22306
ENSMUSG00000031422	56397	Morf4l2	mortality factor 4 like 2	protein_coding	1.86108	6.63844	3.17031e-11	7.41634e-09	1825	1704	1364	1619	3854	4790	6153	11.05	10.9702	10.9528	10.8867	11.9665	11.738	11.8484
ENSMUSG00000002365	66616	Snx9	sorting nexin 9	protein_coding	2.23077	6.63267	3.29675e-11	7.6537e-09	856	759	671	815	2265	2419	3789	9.97723	9.82597	9.94825	9.91535	11.2061	10.7629	11.1551
ENSMUSG00000006219	74202	Fblim1	filamin binding LIM protein 1	protein_coding	3.27988	6.61717	3.66152e-11	8.43663e-09	125	122	73	120	550	487	659	7.39314	7.37864	7.01163	7.34895	9.21138	8.53077	8.70526
ENSMUSG00000084131		Rpl3-ps2	ribosomal protein L3, pseudogene 2	processed_pseudogene	4.35462	6.6099	3.84573e-11	8.79495e-09	26	33	20	18	109	166	258	5.70888	5.93729	5.67453	5.40958	7.09654	7.14905	7.4775
ENSMUSG00000048612	226101	Myof	myoferlin	protein_coding	2.66543	6.5931	4.30743e-11	9.70596e-09	783	473	511	580	2037	2596	2958	9.852	9.16767	9.56675	9.43977	11.0548	10.8634	10.8024
ENSMUSG00000071714	12984	Csf2rb2	colony stimulating factor 2 receptor, beta 2, low-affinity (granulocyte-macrophage)	protein_coding	10.278	6.57542	4.85165e-11	1.07107e-08	166	58	69	70	1935	632	1567	7.75068	6.51117	6.94531	6.71128	10.9816	8.88438	9.90387
ENSMUSG00000031486	78560	Adgra2	adhesion G protein-coupled receptor A2	protein_coding	3.71253	6.57522	4.85818e-11	1.07107e-08	276	185	149	200	1181	880	1479	8.41748	7.90656	7.89866	7.9982	10.2808	9.34029	9.82275
ENSMUSG00000048949		Gm6206	predicted pseudogene 6206	processed_pseudogene	2.34009	6.56903	5.06443e-11	1.10857e-08	228	223	210	275	636	828	1270	8.16352	8.15087	8.35014	8.4194	9.4127	9.25591	9.60955
ENSMUSG00000030754	70349	Copb1	coatomer protein complex, subunit beta 1	protein_coding	2.3113	6.56262	5.28712e-11	1.14101e-08	781	735	542	652	2053	2177	3410	9.84841	9.78093	9.64898	9.60281	11.0659	10.6132	11.0049
ENSMUSG00000004936	26395	Map2k1	mitogen-activated protein kinase kinase 1	protein_coding	2.63511	6.53017	6.56957e-11	1.3777e-08	576	599	405	709	2039	2028	3212	9.42312	9.49508	9.2438	9.71996	11.0562	10.5126	10.9197
ENSMUSG00000021556	105348	Golm1	golgi membrane protein 1	protein_coding	3.36871	6.52595	6.75717e-11	1.39914e-08	78	92	76	124	426	398	694	6.82886	7.03652	7.0594	7.38946	8.86039	8.26096	8.77558
ENSMUSG00000008845	93671	Cd163	CD163 antigen	protein_coding	4.26177	6.52313	6.8855e-11	1.41484e-08	347	228	342	474	2411	1888	2709	8.72622	8.18013	9.0108	9.16021	11.2953	10.4113	10.6775
ENSMUSG00000033382	75964	Trappc8	trafficking protein particle complex 8	protein_coding	3.44792	6.49807	8.1359e-11	1.61899e-08	103	155	102	104	447	525	1052	7.15654	7.67918	7.41739	7.1743	8.92617	8.63216	9.34744
ENSMUSG00000100801		Gm15459	predicted gene 15459	processed_pseudogene	2.6138	6.48439	8.90894e-11	1.7442e-08	491	564	462	542	1982	1783	2704	9.20187	9.41134	9.42638	9.34566	11.0158	10.3303	10.6748
ENSMUSG00000113651		Gm4900	predicted gene 4900	processed_pseudogene	7.46615	6.45343	1.09348e-10	2.10754e-08	8	12	7	5	53	103	150	4.86588	5.1227	4.91713	4.62892	6.28876	6.59698	6.82551
ENSMUSG00000024835	23789	Coro1b	coronin, actin binding protein 1B	protein_coding	2.82262	6.44827	1.13131e-10	2.16681e-08	1089	967	854	865	4079	3420	5215	10.3168	10.1667	10.2882	9.99907	12.0479	11.2563	11.6116
ENSMUSG00000024395	225341	Lims2	LIM and senescent cell antigen like domains 2	protein_coding	2.66262	6.41879	1.37358e-10	2.52056e-08	171	186	144	205	524	650	1188	7.78875	7.91355	7.8545	8.03047	9.14453	8.92279	9.51646
ENSMUSG00000058809		Hspd1-ps3	heat shock protein 1 (chaperonin), pseudogene 3	processed_pseudogene	1.99723	6.3953	1.60227e-10	2.90719e-08	313	371	257	324	699	1096	1342	8.5866	8.83436	8.6214	8.64011	9.54416	9.64589	9.68661
ENSMUSG00000026687	56752	Aldh9a1	aldehyde dehydrogenase 9, subfamily A1	protein_coding	1.83312	6.39521	1.60325e-10	2.90719e-08	596	515	450	584	1110	1707	2055	9.47059	9.28527	9.38982	9.44933	10.1932	10.2687	10.2859
ENSMUSG00000026365	12628	Cfh	complement component factor h	protein_coding	7.3348	6.38993	1.65959e-10	2.97415e-08	134	90	126	196	1695	628	2464	7.47964	7.01049	7.68322	7.97186	10.7931	8.87571	10.5429
ENSMUSG00000073198		Bnip3l-ps	BCL2/adenovirus E1B interacting protein 3-like, pseudogene	transcribed_processed_pseudogene	4.13736	6.37942	1.77757e-10	3.1387e-08	163	102	91	80	633	520	1041	7.72734	7.15994	7.27676	6.86391	9.40613	8.61922	9.33287
ENSMUSG00000026728	22352	Vim	vimentin	protein_coding	3.23101	6.37903	1.78213e-10	3.1387e-08	9532	5957	7052	9496	36805	31131	57707	13.4208	12.7627	13.3079	13.4227	15.2137	14.4291	15.0688
ENSMUSG00000060036	27367	Rpl3	ribosomal protein L3	protein_coding	1.7604	6.37447	1.83599e-10	3.21191e-08	1341	1417	1044	1240	2648	3666	4615	10.6117	10.7078	10.5727	10.5078	11.4292	11.3555	11.4367
ENSMUSG00000042997	212114	Nhlrc3	NHL repeat containing 3	protein_coding	2.14008	6.37375	1.84466e-10	3.21191e-08	185	146	127	163	388	565	685	7.89026	7.60328	7.69329	7.73381	8.73313	8.73169	8.75782
ENSMUSG00000032440	21813	Tgfbr2	transforming growth factor, beta receptor II	protein_coding	3.03176	6.36653	1.93353e-10	3.32883e-08	1115	860	863	937	3908	3265	6910	10.3502	10.0015	10.3031	10.1117	11.9865	11.1901	12.0147
ENSMUSG00000026582	20339	Sele	selectin, endothelial cell	protein_coding	16.1906	6.36354	1.97157e-10	3.34317e-08	14	6	15	16	429	80	443	5.21987	4.71989	5.43727	5.32019	8.86997	6.32504	8.17327
ENSMUSG00000020077	19073	Srgn	serglycin	protein_coding	15.3661	6.35446	2.09161e-10	3.50258e-08	343	272	195	355	12240	3125	2163	8.71048	8.41478	8.25156	8.76408	13.6274	11.1276	10.3584
ENSMUSG00000062345	18788	Serpinb2	serine (or cysteine) peptidase inhibitor, clade B, member 2	protein_coding	6.68931	6.35224	2.12197e-10	3.53411e-08	337	407	269	357	5033	1804	3107	8.68654	8.96099	8.68318	8.77172	12.3494	10.3469	10.8724
ENSMUSG00000079451	320454	Tmprss11g	transmembrane protease, serine 11g	protein_coding	17.4813	6.34801	2.18111e-10	3.59355e-08	33	7	2	34	358	346	923	5.92543	4.79955	4.3545	5.95844	8.62407	8.07618	9.16645
ENSMUSG00000045932	15958	Ifit2	interferon-induced protein with tetratricopeptide repeats 2	protein_coding	5.43082	6.34562	2.21537e-10	3.63049e-08	90	50	57	63	546	296	864	6.99563	6.35236	6.72528	6.5936	9.20129	7.87283	9.07543
ENSMUSG00000107035		Ybx1-ps2	Y box protein 1, pseudogene 2	processed_pseudogene	3.35576	6.33491	2.37479e-10	3.85055e-08	113	170	115	160	592	556	1175	7.26898	7.79738	7.56748	7.71007	9.31321	8.70989	9.50113
ENSMUSG00000032691	216799	Nlrp3	NLR family, pyrin domain containing 3	protein_coding	18.5911	6.33403	2.38843e-10	3.85229e-08	23	13	27	27	969	673	125	5.60361	5.17698	5.94641	5.7466	10.0017	8.97042	6.61939
ENSMUSG00000005686	11717	Ampd3	adenosine monophosphate deaminase 3	protein_coding	3.47696	6.32685	2.50217e-10	3.973e-08	205	182	150	264	1053	782	1484	8.02385	7.88538	7.90733	8.36483	10.1188	9.17693	9.82748
ENSMUSG00000021091	20716	Serpina3n	serine (or cysteine) peptidase inhibitor, clade A, member 3N	protein_coding	7.96823	6.32225	2.57774e-10	4.04105e-08	2189	844	893	1760	23890	9376	15772	11.3095	9.97507	10.3514	11.0056	14.5907	12.7017	13.2003
ENSMUSG00000106895		Gm4754	predicted gene 4754	processed_pseudogene	2.55915	6.32184	2.58459e-10	4.04105e-08	127	169	101	132	413	496	758	7.41282	7.78979	7.40516	7.46718	8.81811	8.55544	8.89591
ENSMUSG00000030216	60321	Wbp11	WW domain binding protein 11	protein_coding	1.74555	6.31216	2.75166e-10	4.25882e-08	629	644	518	609	1279	1728	2143	9.54565	9.59607	9.58573	9.50767	10.3935	10.286	10.3452
ENSMUSG00000026580	20344	Selp	selectin, platelet	protein_coding	12.3825	6.30722	2.84086e-10	4.37478e-08	96	90	92	163	3088	466	2440	7.07217	7.01049	7.29013	7.73381	11.6491	8.47152	10.529
ENSMUSG00000039234	69608	Sec24d	Sec24 related gene family, member D (S. cerevisiae)	protein_coding	2.80665	6.30112	2.955e-10	4.5278e-08	209	140	150	233	658	738	1119	8.04914	7.55035	7.90733	8.19886	9.45998	9.09709	9.43319
ENSMUSG00000006386	21687	Tek	TEK receptor tyrosine kinase	protein_coding	2.67892	6.29587	3.05687e-10	4.63752e-08	247	171	169	188	527	818	1289	8.26947	7.80492	8.06284	7.91767	9.15241	9.23911	9.63029
ENSMUSG00000113036		Gm47021	predicted gene, 47021	processed_pseudogene	16.812	6.29432	3.08744e-10	4.64102e-08	5	3	2	1	46	56	135	4.6266	4.42245	4.3545	4.10919	6.14443	5.9684	6.70551
ENSMUSG00000111942		Gm5182	predicted gene 5182	processed_pseudogene	17.6544	6.29422	3.08947e-10	4.64102e-08	4	2	3	8	66	61	269	4.52938	4.28798	4.50295	4.86873	6.52211	6.05088	7.52979
ENSMUSG00000082575		Eef2-ps2	eukaryotic translation elongation factor 2, pseudogene 2	processed_pseudogene	1.97917	6.28294	3.32231e-10	4.9556e-08	556	503	358	523	1194	1513	1972	9.37403	9.25263	9.07363	9.2962	10.2962	10.0985	10.2277
ENSMUSG00000025060	20874	Slk	STE20-like kinase	protein_coding	1.78923	6.278	3.42952e-10	5.07719e-08	1174	1021	862	1024	2070	3067	3928	10.4231	10.2434	10.3014	10.237	11.0777	11.1009	11.2065
ENSMUSG00000006014	96875	Prg4	proteoglycan 4 (megakaryocyte stimulating factor, articular superficial zone protein)	protein_coding	8.39152	6.2712	3.58277e-10	5.27855e-08	340	113	381	266	4555	2104	4135	8.69856	7.28436	9.15942	8.3749	12.2062	10.5648	11.2798
ENSMUSG00000021806	18074	Nid2	nidogen 2	protein_coding	4.75639	6.26889	3.63636e-10	5.29514e-08	140	130	168	192	1409	814	1230	7.53453	7.45751	8.05506	7.94502	10.5306	9.23233	9.56489
ENSMUSG00000021250	14281	Fos	FBJ osteosarcoma oncogene	protein_coding	5.71989	6.2531	4.02384e-10	5.76218e-08	148	230	108	164	1866	921	1308	7.60458	8.19167	7.48862	7.74164	10.9298	9.40349	9.65073
ENSMUSG00000042594	16923	Sh2b3	SH2B adaptor protein 3	protein_coding	2.34764	6.25109	4.07596e-10	5.80659e-08	289	290	205	253	799	835	1337	8.47919	8.50073	8.31802	8.3081	9.73096	9.26756	9.68139
ENSMUSG00000036334	242050	Igsf10	immunoglobulin superfamily, member 10	protein_coding	3.15719	6.24931	4.12282e-10	5.80659e-08	188	121	118	160	545	583	1188	7.91111	7.36847	7.59998	7.71007	9.19876	8.77433	9.51646
ENSMUSG00000049892	19416	Rasd1	RAS, dexamethasone-induced 1	protein_coding	3.71149	6.24901	4.13065e-10	5.80659e-08	61	56	51	58	277	228	535	6.55251	6.47315	6.60081	6.503	8.28015	7.53985	8.42421
ENSMUSG00000019987	11846	Arg1	arginase, liver	protein_coding	9.36748	6.24128	4.3401e-10	6.04556e-08	1220	293	220	309	6883	6597	8715	10.4776	8.51457	8.41229	8.57607	12.7991	12.1969	12.3477
ENSMUSG00000024810	77125	Il33	interleukin 33	protein_coding	4.35242	6.21923	4.99612e-10	6.74476e-08	988	341	438	550	3429	3798	4862	10.1793	8.71961	9.3523	9.36599	11.7991	11.4061	11.5113
ENSMUSG00000020674	69675	Pxdn	peroxidasin	protein_coding	3.07703	6.20554	5.45098e-10	7.20023e-08	374	319	250	429	1389	1211	2567	8.82819	8.62924	8.5841	9.0229	10.5104	9.78552	10.601
ENSMUSG00000117458		Gm6552	predicted gene 6552	processed_pseudogene	3.2381	6.19422	5.85726e-10	7.67075e-08	105	150	67	136	427	516	886	7.17975	7.63751	6.91094	7.50451	8.86359	8.60878	9.11005
ENSMUSG00000041130	213753	Zfp598	zinc finger protein 598	protein_coding	1.88833	6.18522	6.20176e-10	8.08735e-08	639	695	491	570	1368	1831	2361	9.56764	9.70257	9.5111	9.4156	10.4888	10.3679	10.4824
ENSMUSG00000020891	11688	Alox8	arachidonate 8-lipoxygenase	protein_coding	9.18329	6.17257	6.719e-10	8.57932e-08	190	87	113	48	1283	685	3169	7.92484	6.97052	7.54539	6.3018	10.3979	8.99466	10.9005
ENSMUSG00000073233		Nfyc-ps	nuclear transcription factor-Y gamma, pseudogene	processed_pseudogene	4.16245	6.16912	6.86709e-10	8.66017e-08	16	26	25	18	95	151	202	5.31644	5.71991	5.87434	5.40958	6.93394	7.03585	7.17669
ENSMUSG00000066245		Gm10156	predicted gene 10156	processed_pseudogene	3.26139	6.16594	7.00648e-10	8.79973e-08	53	62	50	37	204	318	283	6.40069	6.58423	6.57894	6.03975	7.87884	7.96587	7.5937
ENSMUSG00000027074	58207	Slc43a3	solute carrier family 43, member 3	protein_coding	3.66055	6.10838	1.00649e-09	1.2437e-07	276	317	176	353	1562	1064	2237	8.41748	8.62074	8.11614	8.75639	10.6769	9.6045	10.406
ENSMUSG00000024052	64898	Lpin2	lipin 2	protein_coding	3.03213	6.08812	1.14246e-09	1.37838e-07	287	193	174	193	980	847	1218	8.46987	7.96156	8.10111	7.95178	10.0176	9.28732	9.55122
ENSMUSG00000017831	271457	Rab5a	RAB5A, member RAS oncogene family	protein_coding	3.87304	6.08739	1.14764e-09	1.37919e-07	360	343	240	160	1094	1529	2827	8.77622	8.72755	8.52908	7.71007	10.1727	10.1133	10.738
ENSMUSG00000040747	12508	Cd53	CD53 antigen	protein_coding	9.86317	6.08589	1.15849e-09	1.38679e-07	180	108	131	152	3578	907	1364	7.85482	7.22915	7.73289	7.64478	11.86	9.38222	9.70936
ENSMUSG00000040540		Ctdsp2-ps	CTD (carboxy-terminal domain, RNA polymerase II, polypeptide A) small phosphatase 2, pseudogene	processed_pseudogene	4.0889	6.0677	1.29758e-09	1.51773e-07	50	40	20	36	168	188	386	6.33915	6.12388	5.67453	6.0132	7.63011	7.30029	7.99249
ENSMUSG00000005397	18073	Nid1	nidogen 1	protein_coding	2.3465	6.06187	1.34547e-09	1.56176e-07	1209	939	845	1195	2895	3372	5963	10.4647	10.1253	10.2733	10.4554	11.5568	11.2361	11.8035
ENSMUSG00000061306	72055	Slc38a10	solute carrier family 38, member 10	protein_coding	2.14293	6.06127	1.35052e-09	1.56176e-07	1488	1402	1058	1309	3571	3846	6427	10.7594	10.6927	10.5916	10.5846	11.8572	11.424	11.9108
ENSMUSG00000053626	21892	Tll1	tolloid-like	protein_coding	9.77145	6.04158	1.52609e-09	1.73931e-07	9	9	13	5	160	71	189	4.93383	4.94129	5.32778	4.62892	7.56843	6.20205	7.09672
ENSMUSG00000114540		Gm6421	predicted pseudogene 6421	processed_pseudogene	5.80677	6.0414	1.5278e-09	1.73931e-07	70	136	79	45	649	470	1268	6.70557	7.51393	7.10562	6.2352	9.44082	8.48299	9.60735
ENSMUSG00000076564		Igkv12-46	immunoglobulin kappa variable 12-46	IG_V_gene	4.02343e+06	6.04115	1.53022e-09	1.73931e-07	0	0	0	0	194	0	0	3.67762	3.67762	3.67762	3.67762	7.81396	3.67762	3.67762
ENSMUSG00000027131	68032	Emc4	ER membrane protein complex subunit 4	protein_coding	2.14748	6.0332	1.60748e-09	1.79785e-07	514	618	410	489	1232	1655	2554	9.26516	9.53859	9.26077	9.20322	10.3405	10.225	10.5938
ENSMUSG00000003746	17155	Man1a	mannosidase 1, alpha	protein_coding	3.82278	6.03222	1.6172e-09	1.80215e-07	365	317	404	410	2095	1378	3590	8.795	8.62074	9.24038	8.96075	11.0948	9.96689	11.0782
ENSMUSG00000031799	326618	Tpm4	tropomyosin 4	protein_coding	2.48427	6.02719	1.66833e-09	1.85239e-07	3372	2080	2095	2415	8414	9968	11378	11.9278	11.2546	11.5654	11.4572	13.0879	12.7897	12.7307
ENSMUSG00000104802		Gm5869	predicted gene 5869	processed_pseudogene	5.47563	6.02324	1.70964e-09	1.8914e-07	35	47	31	12	222	242	382	5.98126	6.28774	6.07977	5.11769	7.98869	7.61502	7.9789
ENSMUSG00000100078		Gm6170	predicted gene 6170	processed_pseudogene	2.63288	6.01926	1.75216e-09	1.92825e-07	336	412	290	247	1106	1234	1809	8.68251	8.97773	8.7853	8.27619	10.1881	9.8119	10.106
ENSMUSG00000060703	66205	Cd302	CD302 antigen	protein_coding	5.4491	6.01895	1.75553e-09	1.92825e-07	164	165	193	233	2015	805	1906	7.73516	7.75905	8.23789	8.19886	11.0393	9.21696	10.1796
ENSMUSG00000018736	83431	Ndel1	nudE neurodevelopment protein 1 like 1	protein_coding	2.12423	6.01679	1.77906e-09	1.94019e-07	1068	967	763	843	2617	2801	3959	10.2893	10.1667	10.1292	9.96283	11.4124	10.9716	11.2177
ENSMUSG00000042079	98758	Hnrnpf	heterogeneous nuclear ribonucleoprotein F	protein_coding	1.81557	6.01004	1.85474e-09	2.00843e-07	626	610	538	611	1402	1735	2152	9.53898	9.52043	9.63863	9.51224	10.5236	10.2917	10.3512
ENSMUSG00000094433		Igkv5-43	immunoglobulin kappa chain variable 5-43	IG_V_gene	3.66429e+06	6.00382	1.92732e-09	2.07967e-07	0	0	0	0	176	0	0	3.67762	3.67762	3.67762	3.67762	7.68923	3.67762	3.67762
ENSMUSG00000081788		Gm5898	predicted gene 5898	processed_pseudogene	4.47312	5.99991	1.97431e-09	2.11548e-07	60	45	36	20	179	307	427	6.53442	6.24291	6.22977	5.49277	7.71079	7.9201	8.12478
ENSMUSG00000045092	13609	S1pr1	sphingosine-1-phosphate receptor 1	protein_coding	3.09427	5.99851	1.99131e-09	2.12172e-07	351	214	266	298	1356	1141	1663	8.74179	8.09665	8.66798	8.52722	10.4763	9.70215	9.98746
ENSMUSG00000089960	394436	Ugt1a1	UDP glucuronosyltransferase 1 family, polypeptide A1	protein_coding	5.15781	5.9983	1.99398e-09	2.12172e-07	54	55	41	56	157	396	875	6.4206	6.45374	6.36486	6.46504	7.5446	8.25428	9.09285
ENSMUSG00000022125	211286	Cln5	ceroid-lipofuscinosis, neuronal 5	protein_coding	2.62431	5.99082	2.08792e-09	2.18376e-07	318	211	197	239	797	851	1472	8.608	8.07811	8.2651	8.23251	9.72745	9.29384	9.8161
ENSMUSG00000029640	22217	Usp12	ubiquitin specific peptidase 12	protein_coding	2.42567	5.98336	2.18583e-09	2.263e-07	158	222	185	196	592	687	1000	7.68758	8.14494	8.18188	7.97186	9.31321	8.99866	9.2772
ENSMUSG00000112825		Gm9118	predicted gene 9118	processed_pseudogene	2.06823	5.97967	2.23584e-09	2.29924e-07	518	562	402	432	1131	1900	1834	9.27589	9.4064	9.23352	9.03247	10.2196	10.4203	10.1253
ENSMUSG00000025017	83490	Pik3ap1	phosphoinositide-3-kinase adaptor protein 1	protein_coding	5.15098	5.97795	2.25964e-09	2.31594e-07	106	78	106	115	1058	581	702	7.19122	6.84335	7.46527	7.29664	10.1255	8.76965	8.79118
ENSMUSG00000061778	76763	Mospd2	motile sperm domain containing 2	protein_coding	2.71074	5.97394	2.31594e-09	2.35787e-07	121	120	109	121	404	401	783	7.35294	7.35822	7.50016	7.35919	8.78809	8.27093	8.94031
ENSMUSG00000085711		Gm15163	predicted gene 15163	processed_pseudogene	6.14765	5.97271	2.33341e-09	2.36257e-07	19	15	10	29	125	115	324	5.44789	5.27829	5.14149	5.81072	7.26207	6.72021	7.76595
ENSMUSG00000020869	98238	Lrrc59	leucine rich repeat containing 59	protein_coding	2.35031	5.96815	2.39956e-09	2.41306e-07	1134	697	657	926	2416	3523	3835	10.3741	9.70659	9.91862	10.095	11.2982	11.2987	11.1723
ENSMUSG00000064080	14115	Fbln2	fibulin 2	protein_coding	4.07477	5.95746	2.56191e-09	2.55732e-07	1598	1008	1723	1935	8029	6793	17587	10.8609	10.2253	11.286	11.1407	13.0206	12.2389	13.357
ENSMUSG00000078151		Gm12226	predicted pseudogene 12226	processed_pseudogene	6.59169	5.94421	2.77794e-09	2.75502e-07	8	19	9	7	71	99	192	4.86588	5.45783	5.07183	4.79554	6.60233	6.55336	7.11558
ENSMUSG00000063193	217304	Cd300lb	CD300 molecule like family member B	protein_coding	4.89156	5.94062	2.83948e-09	2.80696e-07	39	22	26	37	272	181	243	6.08635	5.57693	5.91086	6.03975	8.25597	7.25389	7.40294
ENSMUSG00000078154		Gm12184	predicted gene 12184	protein_coding	2.3468	5.93808	2.88378e-09	2.84159e-07	174	247	173	186	487	769	1046	7.81111	8.28618	8.09354	7.9038	9.04372	9.1538	9.33951
ENSMUSG00000032382	56440	Snx1	sorting nexin 1	protein_coding	2.01424	5.9318	2.99637e-09	2.92432e-07	689	684	555	601	1756	2011	2374	9.67285	9.68026	9.68211	9.48926	10.8434	10.5007	10.4902
ENSMUSG00000022744	224250	Cldnd1	claudin domain containing 1	protein_coding	2.52898	5.92463	3.13003e-09	3.03544e-07	566	407	299	351	1114	1646	2348	9.39878	8.96099	8.82694	8.74867	10.1983	10.2173	10.4746
ENSMUSG00000035258	320712	Abi3bp	ABI gene family, member 3 (NESH) binding protein	protein_coding	3.84936	5.91434	3.33204e-09	3.21102e-07	152	188	169	271	1124	752	1757	7.63836	7.92743	8.06284	8.39979	10.2109	9.12298	10.0649
ENSMUSG00000074272	26365	Ceacam1	carcinoembryonic antigen-related cell adhesion molecule 1	protein_coding	4.80994	5.91291	3.36114e-09	3.2289e-07	25	13	18	16	129	105	185	5.67475	5.17698	5.58497	5.32019	7.3006	6.61829	7.07118
ENSMUSG00000079297		Gm2223	predicted pseudogene 2223	processed_pseudogene	3.60912	5.91134	3.39341e-09	3.24121e-07	62	48	48	53	201	230	544	6.57037	6.30962	6.53415	6.40607	7.85968	7.55083	8.44657
ENSMUSG00000032332	12816	Col12a1	collagen, type XII, alpha 1	protein_coding	3.06036	5.90544	3.51716e-09	3.33695e-07	658	435	560	729	2849	2418	3391	9.60853	9.05232	9.69465	9.75891	11.5338	10.7623	10.9969
ENSMUSG00000002289	57875	Angptl4	angiopoietin-like 4	protein_coding	6.25614	5.89263	3.80092e-09	3.56205e-07	250	333	196	612	4017	1781	4021	8.28551	8.6874	8.25835	9.51452	12.0259	10.3287	11.2399
ENSMUSG00000021186	23876	Fbln5	fibulin 5	protein_coding	2.52793	5.88574	3.96278e-09	3.69117e-07	700	438	457	480	1599	1887	3017	9.695	9.06177	9.41126	9.17757	10.7102	10.4105	10.8305
ENSMUSG00000069011		Gm10254	predicted gene 10254	processed_pseudogene	3.47804	5.88241	4.04329e-09	3.75475e-07	26	40	38	43	154	178	309	5.70888	6.12388	6.28542	6.18892	7.52037	7.23353	7.70531
ENSMUSG00000064294	71724	Aox3	aldehyde oxidase 3	protein_coding	3.77484	5.88083	4.08211e-09	3.77934e-07	36	33	16	30	116	151	275	6.00832	5.93729	5.4885	5.84162	7.17134	7.03585	7.55754
ENSMUSG00000110768		Gm18541	predicted gene, 18541	processed_pseudogene	4.17115	5.87917	4.1233e-09	3.79455e-07	30	37	23	35	182	134	320	5.83699	6.04707	5.79807	5.9861	7.73203	6.89555	7.75003
ENSMUSG00000035873	114774	Pawr	PRKC, apoptosis, WT1, regulator	protein_coding	2.77424	5.87325	4.27323e-09	3.92075e-07	115	127	70	84	278	443	659	7.29044	7.42845	6.96218	6.92061	8.28494	8.40369	8.70526
ENSMUSG00000037035	16324	Inhbb	inhibin beta-B	protein_coding	2.48621	5.86613	4.46085e-09	4.08068e-07	349	329	219	324	1140	1108	1322	8.73403	8.67103	8.40619	8.64011	10.2308	9.66111	9.66561
ENSMUSG00000032290	56294	Ptpn9	protein tyrosine phosphatase, non-receptor type 9	protein_coding	2.58304	5.86242	4.56161e-09	4.16043e-07	159	189	95	170	513	564	837	7.69562	7.93432	7.32952	7.78771	9.11529	8.72928	9.03178
ENSMUSG00000037827		Gm5884	predicted pseudogene 5884	processed_pseudogene	1.90539	5.85182	4.86215e-09	4.4083e-07	314	324	232	292	605	917	1237	8.5909	8.65029	8.48349	8.49986	9.34332	9.39745	9.57281
ENSMUSG00000026509	12334	Capn2	calpain 2	protein_coding	2.27534	5.84701	5.00491e-09	4.49781e-07	2139	1412	1667	2162	5283	6706	8620	11.2765	10.7028	11.2388	11.299	12.419	12.2204	12.3319
ENSMUSG00000020857	18103	Nme2	NME/NM23 nucleoside diphosphate kinase 2	protein_coding	2.0807	5.8443	5.08718e-09	4.55838e-07	325	308	232	311	796	865	1325	8.63743	8.58184	8.48349	8.58477	9.72569	9.31645	9.66878
ENSMUSG00000020952	76983	Scfd1	Sec1 family domain containing 1	protein_coding	1.94401	5.84243	5.14448e-09	4.59629e-07	334	332	247	308	738	886	1292	8.67442	8.68333	8.56781	8.5717	9.61991	9.34971	9.63354
ENSMUSG00000051439	12475	Cd14	CD14 antigen	protein_coding	13.099	5.84151	5.17306e-09	4.60839e-07	381	298	252	340	11227	3801	1398	8.85349	8.53734	8.59486	8.70542	13.503	11.4072	9.74382
ENSMUSG00000026994	14425	Galnt3	polypeptide N-acetylgalactosaminyltransferase 3	protein_coding	2.33437	5.83959	5.23295e-09	4.64823e-07	88	85	66	90	240	281	423	6.96917	6.94323	6.89344	7.0016	8.09073	7.80574	8.1124
ENSMUSG00000076677		Ighv6-3	immunoglobulin heavy variable 6-3	IG_V_gene	2.39961e+06	5.83458	5.3925e-09	4.76234e-07	0	0	0	0	114	0	0	3.67762	3.67762	3.67762	3.67762	7.15037	3.67762	3.67762
ENSMUSG00000021109	15251	Hif1a	hypoxia inducible factor 1, alpha subunit	protein_coding	3.0941	5.82928	5.56676e-09	4.87409e-07	898	676	663	894	4073	2861	4353	10.0446	9.66381	9.93139	10.0455	12.0457	11.0018	11.3532
ENSMUSG00000062554		Gm12751	predicted gene 12751	processed_pseudogene	1.96267	5.81935	5.90759e-09	5.12856e-07	297	261	190	250	551	897	961	8.51589	8.35961	8.21714	8.29224	9.21389	9.36683	9.22217
ENSMUSG00000035356	80859	Nfkbiz	nuclear factor of kappa light polypeptide gene enhancer in B cells inhibitor, zeta	protein_coding	3.58209	5.79485	6.8383e-09	5.82111e-07	497	318	401	387	2371	1492	2971	9.21865	8.625	9.23007	8.88174	11.2714	10.0788	10.8087
ENSMUSG00000023191	14789	P3h3	prolyl 3-hydroxylase 3	protein_coding	2.4347	5.79326	6.90328e-09	5.86014e-07	290	199	168	289	674	870	1293	8.48383	8.00147	8.05506	8.48599	9.49341	9.32444	9.63462
ENSMUSG00000034463	219151	Scara3	scavenger receptor class A, member 3	protein_coding	2.58506	5.78222	7.37198e-09	6.22354e-07	452	340	279	413	1023	1299	2515	9.08775	8.71563	8.73271	8.97074	10.0781	9.88393	10.572
ENSMUSG00000043336	78749	Filip1l	filamin A interacting protein 1-like	protein_coding	2.12266	5.78104	7.42406e-09	6.2389e-07	306	290	281	335	656	1062	1547	8.55609	8.50073	8.74242	8.68533	9.45574	9.60187	9.88583
ENSMUSG00000040732	13876	Erg	ETS transcription factor	protein_coding	3.13494	5.77521	7.68594e-09	6.40042e-07	103	59	69	85	363	322	506	7.15654	6.5298	6.94531	6.93444	8.64283	7.98216	8.34973
ENSMUSG00000062949	320940	Atp11c	ATPase, class VI, type 11C	protein_coding	3.4864	5.77365	7.75738e-09	6.44241e-07	69	93	61	62	362	270	574	6.68937	7.04935	6.80251	6.57594	8.6391	7.75447	8.51866
ENSMUSG00000027656	22403	Ccn5	cellular communication network factor 5	protein_coding	4.33944	5.76153	8.33547e-09	6.84827e-07	352	256	400	366	2489	1313	3404	8.74566	8.33381	9.22662	8.80562	11.3407	9.89898	11.0024
ENSMUSG00000020407	22271	Upp1	uridine phosphorylase 1	protein_coding	12.5531	5.75708	8.55803e-09	7.00714e-07	177	109	62	110	3894	846	883	7.83314	7.24037	6.82117	7.24233	11.9813	9.28568	9.10538
ENSMUSG00000068523	14707	Gng5	guanine nucleotide binding protein (G protein), gamma 5	protein_coding	2.11633	5.75676	8.57458e-09	7.00714e-07	435	449	320	563	1113	1446	2034	9.03503	9.0959	8.91966	9.39843	10.197	10.0347	10.2714
ENSMUSG00000032502	20840	Stac	src homology three (SH3) and cysteine rich domain	protein_coding	7.18914	5.75375	8.72858e-09	7.11403e-07	6	7	6	4	44	58	108	4.71362	4.79955	4.82993	4.53147	6.1002	6.00201	6.45953
ENSMUSG00000061535	109323	C1qtnf7	C1q and tumor necrosis factor related protein 7	protein_coding	5.10553	5.74909	8.97267e-09	7.28984e-07	19	33	21	43	245	151	299	5.44789	5.93729	5.71705	6.18892	8.11783	7.03585	7.66341
ENSMUSG00000053581	100494	Zfand2a	zinc finger, AN1-type domain 2A	protein_coding	2.0759	5.74336	9.28141e-09	7.48497e-07	277	224	195	200	556	749	993	8.42233	8.15677	8.25156	7.9982	9.22637	9.11747	9.26747
ENSMUSG00000076605		Igkj2	immunoglobulin kappa joining 2	IG_J_gene	1.83656e+06	5.72741	1.01978e-08	8.15957e-07	0	0	0	0	86	0	0	3.67762	3.67762	3.67762	3.67762	6.81857	3.67762	3.67762
ENSMUSG00000101795		Gm5835	predicted gene 5835	processed_pseudogene	1.82246	5.71892	1.07204e-08	8.53318e-07	870	822	554	783	1526	2406	2883	10.0001	9.93793	9.67959	9.8591	10.6438	10.7553	10.7659
ENSMUSG00000024513	17191	Mbd2	methyl-CpG binding domain protein 2	protein_coding	2.03579	5.71496	1.0973e-08	8.71158e-07	1299	1467	894	1251	3373	3920	4690	10.5665	10.7571	10.353	10.5203	11.7755	11.4512	11.4598
ENSMUSG00000023075	68050	Akirin1	akirin 1	protein_coding	2.17366	5.71449	1.10033e-08	8.71305e-07	393	367	294	300	992	1054	1536	8.89586	8.81958	8.80395	8.53623	10.0347	9.59132	9.87581
ENSMUSG00000081272		Ap2m1-ps	adaptor-related protein complex 2, mu 1 subunit, pseudogene	processed_pseudogene	1.89772	5.70735	1.14752e-08	9.01682e-07	1353	982	912	1127	2481	3474	4250	10.6243	10.1884	10.3812	10.3725	11.3361	11.2787	11.319
ENSMUSG00000005057	23921	Sh2b2	SH2B adaptor protein 2	protein_coding	4.21043	5.69363	1.24365e-08	9.7093e-07	68	55	40	45	386	222	404	6.67298	6.45374	6.33889	6.2352	8.72611	7.50638	8.05207
ENSMUSG00000004655	11826	Aqp1	aquaporin 1	protein_coding	2.73683	5.69358	1.24405e-08	9.7093e-07	4489	3088	2935	3386	12117	11101	23935	12.3382	11.8197	12.0483	11.941	13.6128	12.9445	13.8007
ENSMUSG00000028859	12986	Csf3r	colony stimulating factor 3 receptor (granulocyte)	protein_coding	13.6879	5.69343	1.24515e-08	9.7093e-07	91	32	34	79	2181	493	496	7.00868	5.90836	6.17175	6.84938	11.1522	8.54726	8.32313
ENSMUSG00000083833		Gm13841	predicted gene 13841	processed_pseudogene	4.80942	5.6866	1.29597e-08	1.00799e-06	14	14	7	10	51	109	110	5.21987	5.22876	4.91713	5.00063	6.24906	6.65995	6.47932
ENSMUSG00000049470	93736	Aff4	AF4/FMR2 family, member 4	protein_coding	1.90835	5.68526	1.30613e-08	1.01242e-06	595	758	513	620	1417	1886	2552	9.46825	9.82412	9.5722	9.53261	10.5387	10.4098	10.5927
ENSMUSG00000021384	66329	Susd3	sushi domain containing 3	protein_coding	4.91402	5.68209	1.3306e-08	1.02658e-06	56	29	38	50	405	239	318	6.45959	5.81754	6.28542	6.34446	8.79146	7.59924	7.742
ENSMUSG00000047735	209086	Samd9l	sterile alpha motif domain containing 9-like	protein_coding	5.55056	5.68175	1.33327e-08	1.02658e-06	54	63	67	68	706	262	631	6.4206	6.60191	6.91094	6.67866	9.55805	7.71599	8.64642
ENSMUSG00000030986	101437	Dhx32	DEAH (Asp-Glu-Ala-His) box polypeptide 32	protein_coding	2.44366	5.67276	1.40516e-08	1.07608e-06	281	331	307	309	793	1089	1956	8.44153	8.67924	8.86297	8.57607	9.7204	9.63693	10.2162
ENSMUSG00000034484	67804	Snx2	sorting nexin 2	protein_coding	2.24914	5.6724	1.40809e-08	1.07608e-06	759	764	733	786	2431	2278	3613	9.80833	9.83518	10.0726	9.86447	11.3071	10.6776	11.0873
ENSMUSG00000104913		Gm6560	predicted gene 6560	processed_pseudogene	1.77834	5.66445	1.47498e-08	1.11883e-06	3155	2801	2582	3399	6746	9223	9839	11.8325	11.68	11.8647	11.9465	12.7702	12.6781	12.5219
ENSMUSG00000027474	228788	Ccm2l	cerebral cavernous malformation 2-like	protein_coding	2.61926	5.65529	1.55584e-08	1.17435e-06	62	47	58	70	167	294	314	6.57037	6.28774	6.74499	6.71128	7.62254	7.86406	7.72581
ENSMUSG00000049891		Gm7984	predicted gene 7984	processed_pseudogene	2.69609	5.65417	1.56598e-08	1.1791e-06	43	58	35	63	165	217	273	6.1838	6.51117	6.20107	6.5936	7.60729	7.47787	7.54835
ENSMUSG00000036446	17022	Lum	lumican	protein_coding	3.15878	5.64611	1.64121e-08	1.23272e-06	1538	1327	1389	1611	5401	4795	13428	10.8064	10.6146	10.9787	10.8796	12.4507	11.7395	12.9688
ENSMUSG00000074743	21824	Thbd	thrombomodulin	protein_coding	2.53408	5.64001	1.70041e-08	1.26478e-06	498	310	363	552	1448	1697	2146	9.22143	8.59057	9.09272	9.37103	10.5694	10.2604	10.3472
ENSMUSG00000027398	16176	Il1b	interleukin 1 beta	protein_coding	38.2072	5.63349	1.76599e-08	1.30721e-06	125	287	113	240	20595	5563	1792	7.39314	8.48676	7.54539	8.23805	14.3769	11.9524	10.0927
ENSMUSG00000029781	27055	Fkbp9	FK506 binding protein 9	protein_coding	2.0772	5.62658	1.83813e-08	1.35082e-06	2225	1867	1669	2251	4322	6360	10371	11.3328	11.1004	11.2405	11.3567	12.1309	12.1444	12.5975
ENSMUSG00000043998	217664	Mgat2	mannoside acetylglucosaminyltransferase 2	protein_coding	2.94603	5.61625	1.95142e-08	1.42046e-06	240	270	245	243	1053	791	1766	8.23134	8.4049	8.55685	8.25452	10.1188	9.19272	10.0721
ENSMUSG00000038607	14700	Gng10	guanine nucleotide binding protein (G protein), gamma 10	protein_coding	6.22553	5.61337	1.98424e-08	1.43752e-06	10	6	6	15	68	68	151	4.9975	4.71989	4.82993	5.27283	6.55476	6.15845	6.83316
ENSMUSG00000061353	20315	Cxcl12	chemokine (C-X-C motif) ligand 12	protein_coding	3.98346	5.61137	2.00731e-08	1.4508e-06	2077	1271	1759	2545	13807	8076	13250	11.2346	10.5535	11.3155	11.5321	13.8008	12.4873	12.9497
ENSMUSG00000036353	70839	P2ry12	purinergic receptor P2Y, G-protein coupled 12	protein_coding	5.2861	5.61072	2.01491e-08	1.45287e-06	24	10	10	17	112	89	190	5.63968	5.00528	5.14149	5.36573	7.12909	6.43791	7.10304
ENSMUSG00000082029		H3f3c	H3 histone, family 3C	processed_pseudogene	3.31196	5.604	2.09455e-08	1.50322e-06	54	78	55	85	302	254	551	6.4206	6.84335	6.68501	6.93444	8.39532	7.67645	8.46371
ENSMUSG00000110644		Gm7390	predicted gene 7390	processed_pseudogene	4.39245	5.60287	2.10831e-08	1.50564e-06	13	22	23	23	73	167	223	5.16834	5.57693	5.79807	5.60788	6.63317	7.15629	7.29706
ENSMUSG00000045691	105663	Thtpa	thiamine triphosphatase	protein_coding	10.2762	5.60251	2.11267e-08	1.50564e-06	7	9	2	4	68	47	167	4.79285	4.94129	4.3545	4.53147	6.55476	5.80557	6.95018
ENSMUSG00000094594		Tpd52-ps	tumor protein D52, pseudogene	processed_pseudogene	4.42169	5.60026	2.14026e-08	1.51825e-06	18	15	9	12	85	80	122	5.40566	5.27829	5.07183	5.11769	6.80514	6.32504	6.59248
ENSMUSG00000026896	71586	Ifih1	interferon induced with helicase C domain 1	protein_coding	4.57956	5.59692	2.1819e-08	1.54065e-06	92	109	103	130	956	417	907	7.02161	7.24037	7.42951	7.44814	9.98272	8.32296	9.14233
ENSMUSG00000062647	27176	Rpl7a	ribosomal protein L7A	protein_coding	1.90555	5.5802	2.40245e-08	1.68474e-06	1452	1238	913	1106	2538	4162	4319	10.7246	10.5162	10.3827	10.3458	11.3686	11.5369	11.342
ENSMUSG00000030790	11535	Adm	adrenomedullin	protein_coding	5.15279	5.57829	2.429e-08	1.69947e-06	222	81	147	170	1522	801	1319	8.12837	6.88703	7.88116	7.78771	10.6401	9.21008	9.66244
ENSMUSG00000045027	70835	Prss22	protease, serine 22	protein_coding	4.88087	5.57737	2.44176e-08	1.70068e-06	487	179	231	265	2495	1343	2717	9.19057	7.86388	8.47769	8.36987	11.3442	9.93072	10.6816
ENSMUSG00000058922		Gm10052	predicted pseudogene 10052	processed_pseudogene	2.31874	5.57155	2.52486e-08	1.75452e-06	350	419	239	308	737	1519	1553	8.73791	9.00084	8.52346	8.5717	9.61802	10.104	9.89127
ENSMUSG00000039519	13123	Cyp7b1	cytochrome P450, family 7, subfamily b, polypeptide 1	protein_coding	9.02518	5.57056	2.53918e-08	1.76048e-06	88	36	29	72	1193	319	602	6.96917	6.02046	6.01475	6.74317	10.295	7.96996	8.58284
ENSMUSG00000037188	230824	Grhl3	grainyhead like transcription factor 3	protein_coding	4.62391	5.567	2.59164e-08	1.78876e-06	425	224	237	107	1404	1795	2490	9.00309	8.15677	8.51215	7.20873	10.5256	10.3398	10.5578
ENSMUSG00000042116	246228	Vwa1	von Willebrand factor A domain containing 1	protein_coding	2.78714	5.55219	2.82114e-08	1.93409e-06	525	411	328	567	2033	1640	2276	9.29448	8.9744	8.95347	9.40826	11.052	10.2122	10.4304
ENSMUSG00000024235	26410	Map3k8	mitogen-activated protein kinase kinase kinase 8	protein_coding	3.69235	5.5507	2.84526e-08	1.94627e-06	109	54	42	67	381	334	462	7.22507	6.43405	6.39035	6.66206	8.70841	8.02994	8.22881
ENSMUSG00000026072	16177	Il1r1	interleukin 1 receptor, type I	protein_coding	4.47623	5.54786	2.89184e-08	1.97373e-06	227	267	211	304	2259	947	1867	8.15772	8.38996	8.35647	8.55407	11.2023	9.44219	10.1505
ENSMUSG00000051225	239463	Fam83a	family with sequence similarity 83, member A	protein_coding	3.58961	5.54732	2.90087e-08	1.97549e-06	203	103	76	102	635	680	717	8.01103	7.17171	7.0594	7.15088	9.41051	8.98461	8.81999
ENSMUSG00000007458	17113	M6pr	mannose-6-phosphate receptor, cation dependent	protein_coding	2.21036	5.54483	2.94237e-08	1.99931e-06	1163	979	813	1010	3265	3071	4075	10.4098	10.1841	10.2187	10.2175	11.7289	11.1027	11.259
ENSMUSG00000044211		Gm7887	predicted gene 7887	processed_pseudogene	2.83694	5.53064	3.19064e-08	2.14423e-06	82	93	67	60	299	277	467	6.88667	7.04935	6.91094	6.53995	8.38198	7.78731	8.24307
ENSMUSG00000043953	54199	Ccrl2	chemokine (C-C motif) receptor-like 2	protein_coding	9.024	5.52928	3.21542e-08	2.15616e-06	17	47	27	16	534	321	186	5.36189	6.28774	5.94641	5.32019	9.17061	7.9781	7.07761
ENSMUSG00000059326	12982	Csf2ra	colony stimulating factor 2 receptor, alpha, low-affinity (granulocyte-macrophage)	protein_coding	5.77907	5.52628	3.27087e-08	2.18379e-06	125	114	92	98	1414	557	684	7.39314	7.29515	7.29013	7.10285	10.5357	8.71233	8.75584
ENSMUSG00000042244	242100	Pglyrp3	peptidoglycan recognition protein 3	protein_coding	8.03394	5.5246	3.30228e-08	2.19996e-06	33	16	8	4	146	171	282	5.92543	5.32579	4.99734	4.53147	7.45366	7.18486	7.58923
ENSMUSG00000031668	13666	Eif2ak3	eukaryotic translation initiation factor 2 alpha kinase 3	protein_coding	2.11308	5.52337	3.3256e-08	2.21069e-06	153	192	135	139	407	524	676	7.64668	7.9548	7.77142	7.53188	8.79817	8.62958	8.73984
ENSMUSG00000036144	17286	Meox2	mesenchyme homeobox 2	protein_coding	2.91756	5.5179	3.43074e-08	2.27565e-06	102	121	97	112	431	348	773	7.14479	7.36847	7.35518	7.26431	8.87633	8.08374	8.92271
ENSMUSG00000041608	215446	Entpd3	ectonucleoside triphosphate diphosphohydrolase 3	protein_coding	4.05856	5.51106	3.56679e-08	2.3557e-06	35	34	12	27	166	159	185	5.98126	5.9656	5.26898	5.7466	7.61494	7.09735	7.07118
ENSMUSG00000001729	11651	Akt1	thymoma viral proto-oncogene 1	protein_coding	2.18129	5.50749	3.63994e-08	2.39369e-06	2244	1760	1177	1468	4136	6170	7495	11.345	11.0163	10.743	10.7474	12.0678	12.1009	12.1312
ENSMUSG00000021681	66549	Aggf1	angiogenic factor with G patch and FHA domains 1	protein_coding	1.7647	5.50101	3.77631e-08	2.47275e-06	612	688	512	604	1278	1662	2331	9.50747	9.68841	9.56948	9.49619	10.3924	10.231	10.4643
ENSMUSG00000086688		Gm11560	predicted gene 11560	processed_pseudogene	2.36953	5.4854	4.12546e-08	2.66157e-06	194	231	242	211	643	766	1199	7.95192	8.1974	8.54025	8.06825	9.42791	9.1484	9.5293
ENSMUSG00000059498	14131	Fcgr3	Fc receptor, IgG, low affinity III	protein_coding	7.19881	5.48251	4.19333e-08	2.69967e-06	547	199	312	402	6170	1976	3018	9.35138	8.00147	8.88504	8.93376	12.642	10.4758	10.831
ENSMUSG00000026786	54519	Apbb1ip	amyloid beta (A4) precursor protein-binding, family B, member 1 interacting protein	protein_coding	3.17865	5.47519	4.37044e-08	2.78126e-06	264	169	215	261	1189	832	1393	8.35807	7.78979	8.38155	8.34958	10.2903	9.26258	9.7388
ENSMUSG00000027962	22329	Vcam1	vascular cell adhesion molecule 1	protein_coding	6.4365	5.4669	4.57976e-08	2.90573e-06	132	75	102	124	1602	485	931	7.46087	6.79827	7.41739	7.38946	10.7129	8.52523	9.17836
ENSMUSG00000067106		Gm5529	predicted pseudogene 5529	processed_pseudogene	2.37767	5.46522	4.62323e-08	2.92725e-06	108	110	61	81	238	390	423	7.21387	7.25149	6.80251	6.8783	8.07974	8.23404	8.1124
ENSMUSG00000031402	17524	Mpp1	membrane protein, palmitoylated	protein_coding	2.09472	5.45658	4.854e-08	3.05443e-06	819	546	532	627	1685	2030	2747	9.91512	9.3663	9.62296	9.54826	10.7847	10.514	10.6972
ENSMUSG00000053062	67374	Jam2	junction adhesion molecule 2	protein_coding	2.37278	5.4511	5.00606e-08	3.13632e-06	296	203	232	284	728	832	1443	8.51135	8.02747	8.48349	8.46256	9.60086	9.26258	9.7882
ENSMUSG00000028369	64817	Svep1	sushi, von Willebrand factor type A, EGF and pentraxin domain containing 1	protein_coding	2.90053	5.44895	5.06679e-08	3.16236e-06	709	325	457	471	1628	2153	3353	9.71288	8.65446	9.41126	9.15145	10.7357	10.5975	10.9808
ENSMUSG00000079108	100101806	Srp54c	signal recognition particle 54C	protein_coding	3.10868	5.44257	5.25167e-08	3.27109e-06	58	52	39	38	167	186	377	6.49751	6.39381	6.31241	6.06579	7.62254	7.28718	7.96174
ENSMUSG00000081519		Gm13331	predicted gene 13331	processed_pseudogene	4.19937	5.44082	5.30366e-08	3.29495e-06	18	14	11	25	99	90	156	5.40566	5.22876	5.20703	5.67913	6.98234	6.44989	6.87078
ENSMUSG00000103847		Gm20056	predicted gene, 20056	processed_pseudogene	7.46546	5.43855	5.37174e-08	3.3256e-06	6	6	3	11	53	54	137	4.71362	4.71989	4.50295	5.06075	6.28876	5.93391	6.72211
ENSMUSG00000032216	17999	Nedd4	neural precursor cell expressed, developmentally down-regulated 4	protein_coding	2.74437	5.43486	5.48402e-08	3.38256e-06	1679	2576	1461	2150	6002	6676	14502	10.9313	11.5602	11.0507	11.2911	12.6023	12.2139	13.0795
ENSMUSG00000073902		Gm1966	predicted gene 1966	unprocessed_pseudogene	14.0241	5.4264	5.75005e-08	3.51549e-06	3	7	6	5	178	41	100	4.41788	4.79955	4.82993	4.62892	7.70364	5.68447	6.3774
ENSMUSG00000025289	53381	Prdx4	peroxiredoxin 4	protein_coding	1.93308	5.42395	5.82974e-08	3.55098e-06	552	447	426	435	1182	1497	1692	9.36401	9.08975	9.31378	9.04198	10.2819	10.0835	10.0118
ENSMUSG00000080832		M6pr-ps	mannose-6-phosphate receptor, pseudogene	processed_pseudogene	7.59353	5.42142	5.91279e-08	3.58569e-06	4	5	7	4	45	47	101	4.52938	4.63238	4.91713	4.53147	6.1225	5.80557	6.38793
ENSMUSG00000067653	78321	Ankrd23	ankyrin repeat domain 23	protein_coding	5.35628	5.42083	5.93228e-08	3.58569e-06	161	306	188	314	2011	786	3494	7.71157	8.57305	8.20314	8.59773	11.0365	9.18397	11.0395
ENSMUSG00000028688	68276	Toe1	target of EGR1, member 1 (nuclear)	protein_coding	2.00727	5.41823	6.01907e-08	3.63099e-06	200	233	146	217	416	740	828	7.9916	8.2088	7.87233	8.10506	8.82797	9.10082	9.01694
ENSMUSG00000067161		Gm5560	predicted pseudogene 5560	processed_pseudogene	2.5234	5.4163	6.08438e-08	3.66318e-06	168	164	116	97	364	634	718	7.76603	7.75126	7.5784	7.09058	8.64655	8.8887	8.82189
ENSMUSG00000095478		Gm9824	predicted pseudogene 9824	processed_pseudogene	2.28078	5.41196	6.23393e-08	3.73123e-06	95	117	76	90	249	323	500	7.0597	7.32704	7.0594	7.0016	8.13916	7.9862	8.33383
ENSMUSG00000027944	23897	Hax1	HCLS1 associated X-1	protein_coding	1.87875	5.40974	6.31161e-08	3.76302e-06	210	222	169	194	469	579	785	8.05539	8.14494	8.06284	7.9585	8.99201	8.76496	8.9438
ENSMUSG00000108484		Gm18537	predicted gene, 18537	transcribed_processed_pseudogene	11.9574	5.40932	6.32631e-08	3.76446e-06	1	3	2	4	30	43	79	4.10811	4.42245	4.3545	4.53147	5.74103	5.72612	6.13499
ENSMUSG00000062081		Gm6055	predicted gene 6055	processed_pseudogene	2.27095	5.39816	6.73288e-08	3.98319e-06	525	405	319	434	1359	1280	1941	9.29448	8.95424	8.91538	9.03882	10.4794	9.86324	10.2053
ENSMUSG00000078771	14017	Evi2a	ecotropic viral integration site 2a	protein_coding	4.0733	5.39179	6.9759e-08	4.10319e-06	197	138	145	96	1058	606	1066	7.97189	7.53226	7.86344	7.07821	10.1255	8.82703	9.36579
ENSMUSG00000020604	74008	Arsg	arylsulfatase G	protein_coding	2.38241	5.38507	7.24157e-08	4.23508e-06	57	68	61	55	166	235	316	6.47868	6.6871	6.80251	6.44566	7.61494	7.57793	7.73393
ENSMUSG00000103439		Gm7019	predicted pseudogene 7019	processed_pseudogene	119.634	5.37153	7.80693e-08	4.50553e-06	0	0	0	0	32	15	62	3.67762	3.67762	3.67762	3.67762	5.79876	4.95009	5.90086
ENSMUSG00000027996	20319	Sfrp2	secreted frizzled-related protein 2	protein_coding	3.22326	5.37096	7.83183e-08	4.5114e-06	551	287	209	315	991	2289	2180	9.36149	8.48676	8.34377	8.60203	10.0333	10.6844	10.3694
ENSMUSG00000038702	319901	Dsel	dermatan sulfate epimerase-like	protein_coding	1.88234	5.36842	7.94303e-08	4.56687e-06	207	165	157	197	404	565	719	8.03655	7.75905	7.9666	7.97849	8.78809	8.73169	8.82378
ENSMUSG00000032116	16430	Stt3a	STT3, subunit of the oligosaccharyltransferase complex, homolog A (S. cerevisiae)	protein_coding	1.77997	5.36586	8.0563e-08	4.62113e-06	1311	1077	916	1081	2478	3386	3609	10.5796	10.3189	10.3874	10.3135	11.3344	11.242	11.0857
ENSMUSG00000016319	11740	Slc25a5	solute carrier family 25 (mitochondrial carrier, adenine nucleotide translocator), member 5	protein_coding	1.7265	5.36561	8.06756e-08	4.62113e-06	3736	3130	2743	3081	6183	10237	10645	12.0748	11.8391	11.9513	11.8057	12.645	12.828	12.635
ENSMUSG00000033880	19039	Lgals3bp	lectin, galactoside-binding, soluble, 3 binding protein	protein_coding	5.50883	5.36195	8.23297e-08	4.70708e-06	805	235	504	529	5204	2362	5736	9.8909	8.22012	9.54751	9.31201	12.3974	10.729	11.7479
ENSMUSG00000056131	109785	Pgm3	phosphoglucomutase 3	protein_coding	2.05703	5.35977	8.33283e-08	4.74646e-06	129	112	97	115	311	384	433	7.43223	7.27349	7.35518	7.29664	8.43463	8.2135	8.14316
ENSMUSG00000037936	20778	Scarb1	scavenger receptor class B, member 1	protein_coding	2.42336	5.35487	8.5616e-08	4.85871e-06	1629	1123	868	1170	3828	3748	6531	10.8882	10.3781	10.3112	10.4255	11.9568	11.3871	11.9338
ENSMUSG00000032560	235567	Dnajc13	DnaJ heat shock protein family (Hsp40) member C13	protein_coding	2.03292	5.35401	8.60255e-08	4.8667e-06	446	385	336	459	1097	1136	1799	9.06936	8.88494	8.98651	9.11588	10.1766	9.696	10.0981
ENSMUSG00000054555	11489	Adam12	a disintegrin and metallopeptidase domain 12 (meltrin alpha)	protein_coding	4.01398	5.3459	8.99681e-08	5.04035e-06	129	41	62	86	481	458	566	7.43223	6.14853	6.82117	6.94813	9.02669	8.44829	8.49979
ENSMUSG00000071640		Stxbp3-ps	syntaxin-binding protein 3, pseudogene	processed_pseudogene	6.9047	5.34186	9.19992e-08	5.14474e-06	8	16	10	3	70	81	176	4.86588	5.32579	5.14149	4.41971	6.58665	6.33805	7.01197
ENSMUSG00000000001	14679	Gnai3	guanine nucleotide binding protein (G protein), alpha inhibiting 3	protein_coding	1.98488	5.34135	9.22583e-08	5.14983e-06	1459	1065	1038	1042	2470	4128	4822	10.7315	10.3031	10.5645	10.2616	11.3298	11.5252	11.4995
ENSMUSG00000030560	13032	Ctsc	cathepsin C	protein_coding	4.10619	5.32944	9.85134e-08	5.44935e-06	1668	1045	960	1061	9580	4511	7683	10.9219	10.2763	10.4538	10.2871	13.2747	11.6521	12.1668
ENSMUSG00000022623	58234	Shank3	SH3 and multiple ankyrin repeat domains 3	protein_coding	2.44581	5.32774	9.94419e-08	5.4908e-06	142	159	124	213	519	525	856	7.55237	7.71167	7.66286	8.08063	9.13132	8.63216	9.06264
ENSMUSG00000026335	18484	Pam	peptidylglycine alpha-amidating monooxygenase	protein_coding	1.99792	5.3273	9.96813e-08	5.49413e-06	1471	1206	1343	1485	3298	4067	6386	10.7431	10.479	10.9307	10.7638	11.7433	11.5039	11.9016
ENSMUSG00000022126	16365	Acod1	aconitate decarboxylase 1	protein_coding	68.6434	5.32341	1.0184e-07	5.583e-06	10	28	34	34	5803	835	357	4.9975	5.78581	6.17175	5.95844	12.5539	9.26756	7.89096
ENSMUSG00000052749	244183,102640171	Trim30b	tripartite motif-containing 30B	protein_coding	21.9581	5.32289	1.02134e-07	5.58912e-06	13	4	5	3	396	53	89	5.16834	4.5346	4.73396	4.41971	8.76087	5.91633	6.2558
ENSMUSG00000031089	56774	Slc6a14	solute carrier family 6 (neurotransmitter transporter), member 14	protein_coding	5.49009	5.32068	1.03379e-07	5.64717e-06	216	180	229	125	2046	686	2068	8.09234	7.87108	8.46602	7.39941	11.061	8.99666	10.2948
ENSMUSG00000026890	16874	Lhx6	LIM homeobox protein 6	protein_coding	3.293	5.30736	1.11223e-07	6.05407e-06	71	41	25	54	181	225	366	6.72159	6.14853	5.87434	6.42601	7.72498	7.52321	7.92324
ENSMUSG00000024527	69597	Afg3l2	AFG3-like AAA ATPase 2	protein_coding	1.63832	5.28837	1.23408e-07	6.62321e-06	1017	1006	890	1059	1879	2626	3598	10.2201	10.2225	10.3466	10.2844	10.9397	10.8797	11.0814
ENSMUSG00000041754	58218	Trem3	triggering receptor expressed on myeloid cells 3	protein_coding	66.7506	5.28661	1.24602e-07	6.64286e-06	0	0	1	3	188	48	28	3.67762	3.67762	4.15842	4.41971	7.77358	5.82469	5.24565
ENSMUSG00000053038		Gm6180	predicted pseudogene 6180	processed_pseudogene	2.64818	5.28056	1.28789e-07	6.82826e-06	631	394	311	363	1512	2033	1797	9.55007	8.91654	8.88065	8.79441	10.6307	10.5161	10.0966
ENSMUSG00000054196	68588	Cthrc1	collagen triple helix repeat containing 1	protein_coding	4.71043	5.27606	1.31992e-07	6.97397e-06	202	61	208	227	821	1372	2063	8.00458	6.56632	8.33738	8.1644	9.76899	9.96075	10.2914
ENSMUSG00000031503	12827	Col4a2	collagen, type IV, alpha 2	protein_coding	3.19608	5.27543	1.32446e-07	6.98588e-06	2403	1200	1003	2137	7964	7159	10137	11.4428	10.472	10.5159	11.2824	13.0089	12.3142	12.5647
ENSMUSG00000047434	268880	Xxylt1	xyloside xylosyltransferase 1	protein_coding	1.96349	5.27326	1.34018e-07	7.04458e-06	171	195	146	182	370	540	798	7.78875	7.97499	7.87233	7.87565	8.66869	8.67029	8.96631
ENSMUSG00000038578	634731	Susd1	sushi domain containing 1	protein_coding	3.86996	5.2699	1.36497e-07	7.15036e-06	44	20	27	42	199	154	259	6.20711	5.49882	5.94641	6.16518	7.84677	7.05923	7.48233
ENSMUSG00000091269		Gm6682	predicted gene 6682	processed_pseudogene	3.51206	5.2669	1.38749e-07	7.25593e-06	14	19	14	16	60	90	127	5.21987	5.45783	5.38378	5.32019	6.41929	6.44989	6.63704
ENSMUSG00000037306	230815	Man1c1	mannosidase, alpha, class 1C, member 1	protein_coding	2.23431	5.25621	1.47056e-07	7.59954e-06	291	371	308	392	954	1019	1805	8.48845	8.83436	8.86741	8.89929	9.97977	9.54421	10.1028
ENSMUSG00000001435	12822	Col18a1	collagen, type XVIII, alpha 1	protein_coding	2.63685	5.25495	1.48065e-07	7.62595e-06	2574	1274	1169	1587	5072	7572	8599	11.5411	10.5568	10.7333	10.8582	12.3605	12.3947	12.3284
ENSMUSG00000082321		Gm14253	predicted gene 14253	processed_pseudogene	5.40797	5.24799	1.53767e-07	7.90635e-06	16	62	32	42	343	205	422	5.31644	6.58423	6.11113	6.16518	8.56627	7.40705	8.10928
ENSMUSG00000029298	236573	Gbp9	guanylate-binding protein 9	protein_coding	6.5666	5.24614	1.55319e-07	7.95944e-06	54	16	34	43	486	178	428	6.4206	5.32579	6.17175	6.18892	9.0409	7.23353	8.12786
ENSMUSG00000022372	20491	Sla	src-like adaptor	protein_coding	7.54867	5.23653	1.63626e-07	8.31564e-06	55	29	38	34	728	213	299	6.44023	5.81754	6.28542	5.95844	9.60086	7.45465	7.66341
ENSMUSG00000001768	74030	Rin2	Ras and Rab interactor 2	protein_coding	1.87021	5.23621	1.63908e-07	8.31614e-06	980	997	653	874	2194	2495	3202	10.1678	10.2098	9.91004	10.0136	11.1606	10.8069	10.9152
ENSMUSG00000032363	108153	Adamts7	a disintegrin-like and metallopeptidase (reprolysin type) with thrombospondin type 1 motif, 7	protein_coding	4.01754	5.22858	1.70814e-07	8.63793e-06	77	48	31	72	405	292	333	6.81403	6.30962	6.07977	6.74317	8.79146	7.85524	7.80114
ENSMUSG00000035164	244871	Zc3h12c	zinc finger CCCH type containing 12C	protein_coding	2.95962	5.22086	1.78092e-07	8.97876e-06	29	25	25	36	119	123	170	5.80613	5.68565	5.87434	6.0132	7.20223	6.79672	6.97108
ENSMUSG00000042804	100129	Gpr153	G protein-coupled receptor 153	protein_coding	2.15306	5.20849	1.90388e-07	9.56466e-06	359	295	229	345	810	885	1565	8.77243	8.52372	8.46602	8.72524	9.7501	9.34814	9.90208
ENSMUSG00000034271	81703	Jdp2	Jun dimerization protein 2	protein_coding	3.13053	5.19599	2.03632e-07	1.02133e-05	110	106	105	130	631	476	513	7.23617	7.20645	7.45345	7.44814	9.40173	8.50004	8.36807
ENSMUSG00000061897		Gm14292	predicted gene 14292	processed_pseudogene	5.69529	5.19273	2.07237e-07	1.03771e-05	13	27	8	11	101	85	232	5.16834	5.75328	4.99734	5.06075	7.00593	6.38888	7.34568
ENSMUSG00000031673	12552	Cdh11	cadherin 11	protein_coding	2.48515	5.19194	2.08115e-07	1.04041e-05	65	107	70	101	235	334	497	6.62262	7.21785	6.96218	7.13903	8.06311	8.02994	8.32581
ENSMUSG00000091905		Dnajb6-ps	DnaJ heat shock protein family (Hsp40) member B6, pseudogene	processed_pseudogene	2.73391	5.1867	2.14057e-07	1.06837e-05	44	45	33	43	144	145	267	6.20711	6.24291	6.14178	6.18892	7.43648	6.98791	7.52043
ENSMUSG00000031555	11502	Adam9	a disintegrin and metallopeptidase domain 9 (meltrin gamma)	protein_coding	3.63377	5.18236	2.19091e-07	1.08994e-05	252	370	341	451	2217	1187	2662	8.2961	8.83068	9.00678	9.09166	11.1755	9.75748	10.6526
ENSMUSG00000024401	21926	Tnf	tumor necrosis factor	protein_coding	10.1488	5.18174	2.19825e-07	1.09182e-05	30	21	30	38	756	373	110	5.83699	5.53849	6.04765	6.06579	9.65358	8.17508	6.47932
ENSMUSG00000026024	74018	Als2	alsin Rho guanine nucleotide exchange factor	protein_coding	2.36369	5.18041	2.21398e-07	1.09786e-05	148	141	102	175	375	455	841	7.60458	7.55931	7.41739	7.82501	8.68688	8.43948	9.03834
ENSMUSG00000013701	53600	Timm23	translocase of inner mitochondrial membrane 23	protein_coding	2.15282	5.17067	2.33261e-07	1.1509e-05	107	136	100	137	266	424	612	7.20259	7.51393	7.39283	7.51369	8.2264	8.34515	8.60508
ENSMUSG00000026749	59126	Nek6	NIMA (never in mitosis gene a)-related expressed kinase 6	protein_coding	3.66978	5.1697	2.34471e-07	1.15335e-05	174	139	143	153	1079	542	923	7.81111	7.54133	7.8455	7.65311	10.1532	8.6753	9.16645
ENSMUSG00000029484	11745	Anxa3	annexin A3	protein_coding	2.41783	5.16791	2.36724e-07	1.16256e-05	335	349	346	374	1283	1039	1775	8.67847	8.75112	9.02677	8.83509	10.3979	9.57132	10.0792
ENSMUSG00000009292	28240	Trpm2	transient receptor potential cation channel, subfamily M, member 2	protein_coding	18.0436	5.16684	2.38091e-07	1.16741e-05	6	12	5	8	411	65	61	4.71362	5.1227	4.73396	4.86873	8.81149	6.1134	5.88572
ENSMUSG00000023224	12258	Serping1	serine (or cysteine) peptidase inhibitor, clade G, member 1	protein_coding	3.82188	5.16356	2.42301e-07	1.18483e-05	3584	2351	2462	3263	20093	8639	23009	12.0152	11.4295	11.7965	11.8879	14.3413	12.5841	13.7439
ENSMUSG00000056054	20201	S100a8	S100 calcium binding protein A8 (calgranulin A)	protein_coding	7.99714	5.16047	2.46326e-07	1.19441e-05	12663	1408	7717	3826	81443	68018	96929	13.8298	10.6988	13.4376	12.1162	16.3591	15.5558	15.8166
ENSMUSG00000029198	17713	Grpel1	GrpE-like 1, mitochondrial	protein_coding	1.68009	5.15515	2.53429e-07	1.22691e-05	1137	1060	1016	1234	2247	2967	4045	10.3778	10.2964	10.5342	10.5009	11.1947	11.0536	11.2484
ENSMUSG00000021596	78771	Mctp1	multiple C2 domains, transmembrane 1	protein_coding	4.49164	5.14382	2.69213e-07	1.29718e-05	16	25	11	30	130	95	219	5.31644	5.68565	5.20703	5.84162	7.31007	6.50833	7.2749
ENSMUSG00000030516	21872	Tjp1	tight junction protein 1	protein_coding	2.23174	5.13446	2.8296e-07	1.35701e-05	363	410	279	274	856	1044	1800	8.78752	8.97106	8.73271	8.41452	9.82752	9.57802	10.0989
ENSMUSG00000020120	56193	Plek	pleckstrin	protein_coding	7.87914	5.13093	2.88307e-07	1.3786e-05	257	115	197	238	4134	1284	1096	8.32225	7.30586	8.2651	8.22696	12.0671	9.86762	9.40432
ENSMUSG00000043131	232157	Mob1a	MOB kinase activator 1A	protein_coding	1.89941	5.1309	2.88361e-07	1.3786e-05	924	1026	751	893	2347	2412	3504	10.0848	10.2503	10.1068	10.0439	11.2569	10.7588	11.0436
ENSMUSG00000022503	26425	Nubp1	nucleotide binding protein 1	protein_coding	1.81304	5.11821	3.08447e-07	1.4587e-05	376	448	360	384	927	1143	1402	8.83547	9.09283	9.0813	8.87111	9.9394	9.7046	9.74782
ENSMUSG00000095788	320832	Sirpb1a	signal-regulatory protein beta 1A	protein_coding	35.0127	5.11637	3.11465e-07	1.46744e-05	6	1	4	0	284	32	72	4.71362	4.11081	4.62649	3.67762	8.31334	5.47792	6.0435
ENSMUSG00000112023	14727	Lilr4b	leukocyte immunoglobulin-like receptor, subfamily B, member 4B	protein_coding	11.1875	5.11587	3.12301e-07	1.46744e-05	77	47	100	51	2239	461	434	6.81403	6.28774	7.39283	6.36531	11.1896	8.45704	8.1462
ENSMUSG00000011752	18648	Pgam1	phosphoglycerate mutase 1	protein_coding	3.01102	5.11493	3.13865e-07	1.4707e-05	131	57	75	82	345	472	431	7.45139	6.49229	7.04366	6.89255	8.57412	8.4887	8.13706
ENSMUSG00000026068	16174	Il18rap	interleukin 18 receptor accessory protein	protein_coding	8.70636	5.11258	3.17781e-07	1.48678e-05	49	24	16	17	563	181	204	6.31801	5.65044	5.4885	5.36573	9.24367	7.25389	7.1886
ENSMUSG00000031538	18791	Plat	plasminogen activator, tissue	protein_coding	2.32189	5.10891	3.24018e-07	1.51365e-05	294	220	203	300	567	904	1540	8.50224	8.13302	8.30497	8.53623	9.25347	9.37762	9.87946
ENSMUSG00000024713	18552	Pcsk5	proprotein convertase subtilisin/kexin type 5	protein_coding	4.9641	5.10808	3.2545e-07	1.51802e-05	190	138	126	335	2002	1034	1221	7.92484	7.53226	7.68322	8.68533	11.0301	9.56459	9.55465
ENSMUSG00000046805	17476	Mpeg1	macrophage expressed gene 1	protein_coding	7.06497	5.10474	3.31254e-07	1.53807e-05	589	258	347	498	7429	1716	3319	9.45415	8.34419	9.03073	9.22842	12.9089	10.2762	10.9663
ENSMUSG00000041577	116847	Prelp	proline arginine-rich end leucine-rich repeat	protein_coding	2.74199	5.1043	3.32029e-07	1.53934e-05	754	520	547	663	2525	1787	3932	9.79907	9.29865	9.66181	9.62617	11.3613	10.3335	11.208
ENSMUSG00000000204	20558	Slfn4	schlafen 4	protein_coding	47.3342	5.10219	3.35743e-07	1.55186e-05	33	37	13	37	4364	458	382	5.92543	6.04707	5.32778	6.03975	12.1447	8.44829	7.9789
ENSMUSG00000019846	16775	Lama4	laminin, alpha 4	protein_coding	2.86376	5.10144	3.37076e-07	1.55411e-05	746	377	445	717	2237	2016	3687	9.78412	8.85626	9.37431	9.73567	11.1883	10.5042	11.1162
ENSMUSG00000079012	20717	Serpina3m	serine (or cysteine) peptidase inhibitor, clade A, member 3M	protein_coding	15.3392	5.10135	3.37245e-07	1.55411e-05	22	15	3	27	691	97	207	5.56648	5.27829	4.50295	5.7466	9.52811	6.53103	7.20629
ENSMUSG00000028268	55932	Gbp3	guanylate binding protein 3	protein_coding	9.72924	5.09486	3.49002e-07	1.60503e-05	199	76	126	150	3642	519	1292	7.98506	6.81346	7.68322	7.62798	11.8854	8.61662	9.63354
ENSMUSG00000091549		Gm6548	predicted gene 6548	processed_pseudogene	2.37273	5.09315	3.52156e-07	1.61554e-05	397	330	203	270	1017	1006	1358	8.90971	8.67514	8.30497	8.39485	10.0698	9.52632	9.70319
ENSMUSG00000028708	17346	Mknk1	MAP kinase-interacting serine/threonine kinase 1	protein_coding	2.55466	5.08577	3.66144e-07	1.67085e-05	179	226	133	236	685	588	1115	7.84763	8.16849	7.75228	8.21579	9.51596	8.78595	9.42821
ENSMUSG00000095690		Rab11b-ps2	RAB11B, member RAS oncogene family, pseudogene 2	processed_pseudogene	2.6661	5.08524	3.67156e-07	1.67184e-05	113	153	117	85	400	428	722	7.26898	7.66266	7.58923	6.93444	8.77455	8.35767	8.82946
ENSMUSG00000041515	15900	Irf8	interferon regulatory factor 8	protein_coding	4.37849	5.08317	3.71195e-07	1.68523e-05	298	205	174	204	2059	939	1196	8.52041	8.0403	8.10111	8.02407	11.0701	9.43039	9.52581
ENSMUSG00000031803	72297	B3gnt3	UDP-GlcNAc:betaGal beta-1,3-N-acetylglucosaminyltransferase 3	protein_coding	2.96056	5.07354	3.90476e-07	1.75972e-05	307	155	194	209	1015	809	1205	8.56049	7.67918	8.24474	8.05576	10.067	9.22381	9.53626
ENSMUSG00000027848	99543	Olfml3	olfactomedin-like 3	protein_coding	2.18288	5.06915	3.99604e-07	1.79558e-05	808	630	632	902	1796	2264	4114	9.89612	9.5654	9.86414	10.058	10.8754	10.6688	11.2726
ENSMUSG00000083283		Gm15361	predicted pseudogene 15361	processed_pseudogene	3.99126	5.06872	4.00494e-07	1.79695e-05	46	30	17	20	156	130	258	6.25256	5.84852	5.53768	5.49277	7.53657	6.86041	7.4775
ENSMUSG00000026029	12370	Casp8	caspase 8	protein_coding	3.06389	5.05988	4.19523e-07	1.86865e-05	381	174	159	222	1035	961	1406	8.85349	7.82731	7.98309	8.13504	10.0945	9.4626	9.75181
ENSMUSG00000004535	52440	Tax1bp1	Tax1 (human T cell leukemia virus type I) binding protein 1	protein_coding	1.77579	5.05778	4.24168e-07	1.88386e-05	1719	2122	1490	1914	4135	4811	6772	10.9648	11.2831	11.0787	11.1252	12.0674	11.7443	11.9858
ENSMUSG00000010025	11671	Aldh3a2	aldehyde dehydrogenase family 3, subfamily A2	protein_coding	2.1429	5.05651	4.26993e-07	1.88819e-05	205	276	182	280	617	712	1164	8.02385	8.43433	8.1603	8.44354	9.37057	9.04775	9.48804
ENSMUSG00000021725	52552	Parp8	poly (ADP-ribose) polymerase family, member 8	protein_coding	1.9782	5.05503	4.30325e-07	1.89473e-05	228	200	152	181	465	546	842	8.16352	8.00802	7.92452	7.86852	8.98026	8.68527	9.03997
ENSMUSG00000035498	109332	Cdcp1	CUB domain containing protein 1	protein_coding	1.782	5.05449	4.3154e-07	1.89735e-05	453	394	331	394	932	1166	1285	9.09079	8.91654	8.96595	8.90625	9.94696	9.73248	9.62595
ENSMUSG00000034928	105239	Rnf44	ring finger protein 44	protein_coding	1.81843	5.04976	4.42359e-07	1.93884e-05	627	615	529	502	1323	1623	2129	9.54121	9.53181	9.61506	9.23948	10.4414	10.1975	10.336
ENSMUSG00000021614	13003	Vcan	versican	protein_coding	2.97678	5.04954	4.42878e-07	1.93884e-05	255	331	272	298	1383	839	1900	8.31185	8.67924	8.69822	8.52722	10.5042	9.27418	10.1752
ENSMUSG00000031595	68797	Pdgfrl	platelet-derived growth factor receptor-like	protein_coding	2.20201	5.04927	4.43507e-07	1.93884e-05	111	92	84	114	207	399	513	7.24719	7.03652	7.17945	7.28594	7.89774	8.26429	8.36807
ENSMUSG00000016664	23970	Pacsin2	protein kinase C and casein kinase substrate in neurons 2	protein_coding	2.06311	5.04882	4.44538e-07	1.94058e-05	659	722	663	658	1911	1869	3058	9.61065	9.75592	9.93139	9.6156	10.9638	10.397	10.8497
ENSMUSG00000043300	26879	B3galnt1	UDP-GalNAc:betaGlcNAc beta 1,3-galactosaminyltransferase, polypeptide 1	protein_coding	4.06124	5.04081	4.63571e-07	2.01941e-05	32	37	38	36	224	121	366	5.89661	6.04707	6.28542	6.0132	8.00039	6.77798	7.92324
ENSMUSG00000037400	76295	Atp11b	ATPase, class VI, type 11B	protein_coding	2.48067	5.04013	4.65221e-07	2.01941e-05	724	383	422	396	1380	2088	2434	9.74218	8.87782	9.30071	8.91318	10.5012	10.554	10.5256
ENSMUSG00000029070	74761	Mxra8	matrix-remodelling associated 8	protein_coding	2.33337	5.03666	4.73727e-07	2.04211e-05	1226	685	838	1116	3073	3392	4440	10.4845	9.6823	10.2615	10.3586	11.6421	11.2446	11.3815
ENSMUSG00000029163	100952	Emilin1	elastin microfibril interfacer 1	protein_coding	3.50886	5.03264	4.83761e-07	2.07922e-05	377	265	321	410	2202	1091	2290	8.83909	8.37991	8.92393	8.96075	11.1658	9.6395	10.4391
ENSMUSG00000009281	71660	Rarres2	retinoic acid receptor responder (tazarotene induced) 2	protein_coding	5.73129	5.02835	4.94706e-07	2.11736e-05	2435	985	1453	2431	23684	7661	13598	11.4617	10.1927	11.0428	11.4666	14.5783	12.4115	12.9869
ENSMUSG00000032698	16909	Lmo2	LIM domain only 2	protein_coding	2.29661	5.01667	5.25749e-07	2.23152e-05	327	227	186	242	737	735	1281	8.64574	8.17432	8.189	8.24905	9.61802	9.09148	9.62159
ENSMUSG00000050088	67912	1600012H06Rik	RIKEN cDNA 1600012H06 gene	protein_coding	1.72798	5.01491	5.30593e-07	2.24586e-05	394	407	348	418	829	1024	1496	8.89933	8.96099	9.03468	8.98725	9.78258	9.55104	9.83878
ENSMUSG00000025429	19201	Pstpip2	proline-serine-threonine phosphatase-interacting protein 2	protein_coding	3.67732	5.01342	5.34721e-07	2.25663e-05	76	102	90	116	444	300	1044	6.79904	7.15994	7.26326	7.30726	8.91696	7.8902	9.33686
ENSMUSG00000044268		Gm4895	predicted gene 4895	processed_pseudogene	5.19241	5.01319	5.35346e-07	2.25663e-05	13	18	5	16	60	84	201	5.16834	5.41541	4.73396	5.32019	6.41929	6.37635	7.1707
ENSMUSG00000040613	11810	Apobec1	apolipoprotein B mRNA editing enzyme, catalytic polypeptide 1	protein_coding	3.56732	5.00859	5.48295e-07	2.30804e-05	199	110	148	124	955	590	843	7.98506	7.25149	7.88994	7.38946	9.98124	8.79057	9.0416
ENSMUSG00000071350	239122	Setdb2	SET domain, bifurcated 2	protein_coding	2.45619	5.00603	5.55654e-07	2.32469e-05	42	58	40	46	145	167	250	6.16009	6.51117	6.33889	6.25776	7.44509	7.15629	7.43822
ENSMUSG00000039308	17423	Ndst2	N-deacetylase/N-sulfotransferase (heparan glucosaminyl) 2	protein_coding	1.92157	5.00207	5.67186e-07	2.35464e-05	301	291	188	239	639	781	945	8.53389	8.50536	8.20314	8.23251	9.41923	9.17516	9.19897
ENSMUSG00000023022	65970	Lima1	LIM domain and actin binding 1	protein_coding	1.72132	5.00185	5.67818e-07	2.35464e-05	1796	1380	1209	1676	2869	4572	5496	11.0272	10.6702	10.7811	10.9359	11.5439	11.6713	11.6867
ENSMUSG00000031502	12826	Col4a1	collagen, type IV, alpha 1	protein_coding	3.2949	4.99702	5.82219e-07	2.40784e-05	3071	1511	1457	3195	12071	9116	14149	11.7938	10.7991	11.0468	11.8578	13.6073	12.6613	13.0441
ENSMUSG00000078937	12895	Cpt1b	carnitine palmitoyltransferase 1b, muscle	protein_coding	5.62739	4.99646	5.83936e-07	2.41169e-05	13	14	7	17	65	69	238	5.16834	5.22876	4.91713	5.36573	6.50549	6.17314	7.3772
ENSMUSG00000045502	80885	Hcar2	hydroxycarboxylic acid receptor 2	protein_coding	4.46589	4.98811	6.09743e-07	2.50141e-05	702	241	277	332	3118	2646	1955	9.699	8.25353	8.72294	8.67314	11.6629	10.8905	10.2155
ENSMUSG00000087298		Gm9392	predicted pseudogene 9392	processed_pseudogene	5.13742	4.98487	6.20027e-07	2.5402e-05	27	79	36	61	464	203	542	5.74212	6.85806	6.22977	6.55806	8.97731	7.3949	8.44163
ENSMUSG00000048234	67702	Rnf149	ring finger protein 149	protein_coding	3.08337	4.97767	6.43553e-07	2.62606e-05	401	461	263	317	2009	1300	1734	8.92342	9.13223	8.65262	8.61058	11.035	9.88501	10.0463
ENSMUSG00000017929	56336	B4galt5	UDP-Gal:betaGlcNAc beta 1,4-galactosyltransferase, polypeptide 5	protein_coding	3.87062	4.97654	6.47315e-07	2.63747e-05	186	159	152	192	1337	554	1113	7.89724	7.71167	7.92452	7.94502	10.4563	8.705	9.42571
ENSMUSG00000024529	16948	Lox	lysyl oxidase	protein_coding	3.1451	4.97501	6.52451e-07	2.64826e-05	811	504	836	1124	4096	3147	5060	9.90133	9.25538	10.2581	10.3687	12.0538	11.1376	11.5684
ENSMUSG00000027375	17153	Mal	myelin and lymphocyte protein, T cell differentiation protein	protein_coding	4.0667	4.96693	6.80195e-07	2.75358e-05	49	25	27	35	255	153	222	6.31801	5.68565	5.94641	5.9861	8.17055	7.05148	7.29155
ENSMUSG00000070327	672511	Rnf213	ring finger protein 213	protein_coding	4.13145	4.9615	6.99507e-07	2.82429e-05	347	197	176	320	2116	909	1758	8.72622	7.98829	8.11614	8.62331	11.109	9.38528	10.0657
ENSMUSG00000060904	104303	Arl1	ADP-ribosylation factor-like 1	protein_coding	1.88657	4.9585	7.10389e-07	2.85694e-05	934	1098	856	959	2252	2532	4216	10.1	10.3462	10.2915	10.1444	11.1979	10.8278	11.3075
ENSMUSG00000025059	14933	Gk	glycerol kinase	protein_coding	3.25355	4.95751	7.14037e-07	2.86785e-05	387	148	252	246	1286	1132	1597	8.87483	7.6205	8.59486	8.2708	10.4012	9.69107	9.93052
ENSMUSG00000049076	78618	Acap2	ArfGAP with coiled-coil, ankyrin repeat and PH domains 2	protein_coding	2.00648	4.95627	7.18578e-07	2.87854e-05	662	486	399	438	1089	1633	2244	9.617	9.2051	9.22316	9.05143	10.1662	10.2061	10.4104
ENSMUSG00000024480	11777	Ap3s1	adaptor-related protein complex 3, sigma 1 subunit	protein_coding	2.29713	4.95438	7.25599e-07	2.89908e-05	232	174	172	213	674	582	924	8.18649	7.82731	8.08592	8.08063	9.49341	8.77199	9.16795
ENSMUSG00000024087	13078	Cyp1b1	cytochrome P450, family 1, subfamily b, polypeptide 1	protein_coding	3.51821	4.9496	7.43649e-07	2.96055e-05	293	352	301	375	2185	981	2185	8.49766	8.76276	8.83603	8.83874	11.1548	9.49127	10.3727
ENSMUSG00000027082	21788	Tfpi	tissue factor pathway inhibitor	protein_coding	3.82057	4.94911	7.45527e-07	2.96325e-05	110	64	70	57	514	278	546	7.23617	6.61937	6.96218	6.48415	9.11798	7.79194	8.45149
ENSMUSG00000039304	22035	Tnfsf10	tumor necrosis factor (ligand) superfamily, member 10	protein_coding	5.20396	4.94612	7.57078e-07	2.99529e-05	37	29	34	81	401	176	530	6.03483	5.81754	6.17175	6.8783	8.77795	7.2198	8.41164
ENSMUSG00000000732	50723	Icosl	icos ligand	protein_coding	1.83758	4.93981	7.82007e-07	3.07633e-05	206	169	128	171	358	521	646	8.03021	7.78979	7.7033	7.79525	8.62407	8.62182	8.67824
ENSMUSG00000048087	11615	Gm4737	predicted gene 4737	protein_coding	2.68529	4.93681	7.94096e-07	3.11525e-05	61	106	74	109	333	316	487	6.55251	7.20645	7.02773	7.23122	8.52641	7.95766	8.29876
ENSMUSG00000030162	108078	Olr1	oxidized low density lipoprotein (lectin-like) receptor 1	protein_coding	18.8461	4.93528	8.00361e-07	3.13177e-05	3	3	3	1	125	33	37	4.41788	4.42245	4.50295	4.10919	7.26207	5.50264	5.45551
ENSMUSG00000058835	11308	Abi1	abl-interactor 1	protein_coding	1.85467	4.93507	8.01211e-07	3.13177e-05	926	856	744	792	2122	2203	3143	10.0879	9.99493	10.0936	9.87514	11.1131	10.63	10.8887
ENSMUSG00000029633		Gm5578	predicted pseudogene 5578	processed_pseudogene	17.0034	4.92865	8.27992e-07	3.22822e-05	2	4	1	0	24	36	96	4.28421	4.5346	4.15842	3.67762	5.5503	5.57395	6.33442
ENSMUSG00000002732	14231	Fkbp7	FK506 binding protein 7	protein_coding	2.02355	4.92631	8.37969e-07	3.26297e-05	289	260	211	333	719	758	1223	8.47919	8.35448	8.35647	8.67721	9.5835	9.13393	9.55693
ENSMUSG00000026341	74117	Actr3	ARP3 actin-related protein 3	protein_coding	2.00127	4.92482	8.4439e-07	3.27964e-05	2490	2074	1873	1994	6205	6689	7157	11.4937	11.2504	11.4052	11.1836	12.6501	12.2167	12.0651
ENSMUSG00000054414	66500	Slc30a7	solute carrier family 30 (zinc transporter), member 7	protein_coding	1.99006	4.9244	8.46211e-07	3.28255e-05	424	295	260	304	835	1057	1194	8.99986	8.52372	8.6371	8.55407	9.79269	9.59529	9.52348
ENSMUSG00000057137	68487	Tmem140	transmembrane protein 140	protein_coding	3.25867	4.91733	8.7731e-07	3.39502e-05	375	444	352	589	2608	1402	2566	8.83183	9.08048	9.05039	9.46119	11.4075	9.99117	10.6005
ENSMUSG00000067017		Capza1-ps1	capping protein (actin filament) muscle Z-line, alpha 1, pseudogene 1	pseudogene	4.83835	4.915	8.87837e-07	3.43099e-05	17	13	24	25	123	85	279	5.36189	5.17698	5.83676	5.67913	7.2424	6.38888	7.57573
ENSMUSG00000073489	15951	Ifi204	interferon activated gene 204	protein_coding	5.36645	4.91423	8.91336e-07	3.44017e-05	273	176	277	331	3192	872	2202	8.40286	7.84205	8.72294	8.66905	11.6965	9.32762	10.3837
ENSMUSG00000078920	15953	Ifi47	interferon gamma inducible protein 47	protein_coding	8.19893	4.91396	8.9257e-07	3.44061e-05	202	73	122	145	2942	537	1072	8.00458	6.7674	7.64221	7.5851	11.5798	8.66275	9.37358
ENSMUSG00000027808	28146	Serp1	stress-associated endoplasmic reticulum protein 1	protein_coding	2.15483	4.91347	8.94764e-07	3.44473e-05	2041	1526	1611	1678	5601	5196	6823	11.2096	10.8132	11.1901	10.9376	12.503	11.8546	11.9965
ENSMUSG00000015766	13860	Eps8	epidermal growth factor receptor pathway substrate 8	protein_coding	3.44403	4.90934	9.13817e-07	3.50926e-05	119	131	171	121	809	470	960	7.33241	7.46707	8.07827	7.35919	9.74837	8.48299	9.22073
ENSMUSG00000032372	18828	Plscr2	phospholipid scramblase 2	protein_coding	6.18261	4.909	9.1544e-07	3.50977e-05	20	7	11	33	159	94	277	5.4887	4.79955	5.20703	5.9302	7.56054	6.49684	7.56666
ENSMUSG00000090084	51795	Srpx	sushi-repeat-containing protein	protein_coding	1.90668	4.90466	9.35901e-07	3.57615e-05	357	286	248	379	711	909	1376	8.76483	8.48207	8.57326	8.85322	9.56789	9.38528	9.72161
ENSMUSG00000059588	54598	Calcrl	calcitonin receptor-like	protein_coding	2.93883	4.90424	9.3788e-07	3.57924e-05	106	133	77	123	454	319	794	7.19122	7.486	7.07498	7.37944	8.94745	7.96996	8.95942
ENSMUSG00000029338	71914	Antxr2	anthrax toxin receptor 2	protein_coding	3.04848	4.90156	9.50808e-07	3.61508e-05	312	230	220	266	1428	825	1341	8.58228	8.19167	8.41229	8.3749	10.5496	9.25089	9.68557
ENSMUSG00000022912	19128	Pros1	protein S (alpha)	protein_coding	2.10187	4.89743	9.70995e-07	3.68269e-05	1131	832	896	1038	2991	2806	4056	10.3703	9.95493	10.3561	10.2561	11.6034	10.9741	11.2523
ENSMUSG00000039286	72007	Fndc3b	fibronectin type III domain containing 3B	protein_coding	3.68109	4.89565	9.79807e-07	3.70748e-05	149	147	130	231	1028	479	1338	7.6131	7.61192	7.72309	8.18746	10.0849	8.50849	9.68243
ENSMUSG00000083443		Gm15519	predicted gene 15519	processed_pseudogene	2.20877	4.89562	9.7995e-07	3.70748e-05	133	113	89	129	257	386	654	7.47029	7.28436	7.24963	7.43853	8.18087	8.22038	8.69493
ENSMUSG00000025314	19271	Ptprj	protein tyrosine phosphatase, receptor type, J	protein_coding	2.87782	4.89481	9.84025e-07	3.71373e-05	221	117	127	165	742	590	780	8.12243	7.32704	7.69329	7.74942	9.62746	8.79057	8.93505
ENSMUSG00000025809	16412	Itgb1	integrin beta 1 (fibronectin receptor beta)	protein_coding	2.08673	4.89246	9.95808e-07	3.75357e-05	3558	3446	3035	4176	11415	10648	12942	12.0048	11.9769	12.0964	12.2417	13.5269	12.8846	12.9158
ENSMUSG00000084145		Gm12263	predicted gene 12263	processed_pseudogene	3.16747	4.89165	9.99931e-07	3.76448e-05	27	31	24	28	121	98	208	5.74212	5.87878	5.83676	5.77906	7.22246	6.54224	7.21213
ENSMUSG00000026656	14130	Fcgr2b	Fc receptor, IgG, low affinity IIb	protein_coding	4.65342	4.88269	1.04646e-06	3.91561e-05	981	351	588	641	6230	2843	4099	10.1693	8.75889	9.76295	9.57906	12.6559	10.9928	11.2674
ENSMUSG00000026814	13805	Eng	endoglin	protein_coding	2.92191	4.87324	1.0978e-06	4.08776e-05	1535	657	912	1364	4936	4599	5887	10.8037	9.62397	10.3812	10.643	12.3215	11.6798	11.7851
ENSMUSG00000020676	20292	Ccl11	chemokine (C-C motif) ligand 11	protein_coding	3.17675	4.86706	1.13268e-06	4.19283e-05	171	180	158	237	914	513	1432	7.78875	7.87108	7.97487	8.22138	9.91955	8.60091	9.77748
ENSMUSG00000113701		B230303A05Rik	RIKEN cDNA B230303A05 gene	transcribed_processed_pseudogene	110.479	4.86589	1.13942e-06	4.20695e-05	0	0	0	2	159	40	16	3.67762	3.67762	3.67762	4.28573	7.56054	5.66313	4.88647
ENSMUSG00000031095	72584	Cul4b	cullin 4B	protein_coding	2.08117	4.86508	1.14412e-06	4.21748e-05	192	195	174	146	494	547	761	7.93844	7.97499	8.10111	7.59378	9.06335	8.68775	8.90131
ENSMUSG00000059657	268885	Stfa2l1	stefin A2 like 1	protein_coding	36.3871	4.86492	1.14503e-06	4.21748e-05	16	28	20	28	2526	516	139	5.31644	5.78581	5.67453	5.77906	11.3618	8.60878	6.73853
ENSMUSG00000048480	227288	Cxcr1	chemokine (C-X-C motif) receptor 1	protein_coding	164.979	4.86053	1.17071e-06	4.30172e-05	0	0	0	1	162	14	11	3.67762	3.67762	3.67762	4.10919	7.5841	4.90942	4.68871
ENSMUSG00000037405	15894	Icam1	intercellular adhesion molecule 1	protein_coding	3.82824	4.8582	1.18456e-06	4.33703e-05	666	345	376	491	3543	1621	2891	9.62541	8.73545	9.1412	9.20886	11.8459	10.1957	10.7699
ENSMUSG00000019872	57319	Smpdl3a	sphingomyelin phosphodiesterase, acid-like 3A	protein_coding	2.63461	4.8579	1.18637e-06	4.33845e-05	1238	624	782	858	2797	2910	5826	10.4983	9.55206	10.1639	9.98763	11.5075	11.026	11.7702
ENSMUSG00000019843	14360	Fyn	Fyn proto-oncogene	protein_coding	1.66025	4.85304	1.21583e-06	4.41981e-05	483	429	341	399	794	1125	1475	9.17918	9.03323	9.00678	8.92351	9.72217	9.68239	9.81895
ENSMUSG00000105987		AI506816	expressed sequence AI506816	processed_transcript	2.55038	4.84834	1.24501e-06	4.50985e-05	756	490	426	407	1468	2886	2116	9.80278	9.21643	9.31378	8.95069	10.5888	11.0142	10.3273
ENSMUSG00000022906	80285	Parp9	poly (ADP-ribose) polymerase family, member 9	protein_coding	3.83817	4.84719	1.25223e-06	4.51587e-05	292	204	201	241	1821	738	1476	8.49306	8.0339	8.29181	8.24356	10.8951	9.09709	9.8199
ENSMUSG00000000290	16414	Itgb2	integrin beta 2	protein_coding	5.82369	4.84445	1.26964e-06	4.57206e-05	318	151	233	304	3573	1134	1453	8.608	7.64594	8.48927	8.55407	11.858	9.69354	9.79788
ENSMUSG00000024679	68774	Ms4a6d	membrane-spanning 4-domains, subfamily A, member 6D	protein_coding	9.62194	4.84384	1.27354e-06	4.58071e-05	211	37	134	172	3524	738	1209	8.06161	6.04707	7.76188	7.80275	11.8382	9.09709	9.54088
ENSMUSG00000029379	330122	Cxcl3	chemokine (C-X-C motif) ligand 3	protein_coding	46.7879	4.84172	1.28722e-06	4.61365e-05	7	50	18	65	4722	1026	444	4.79285	6.35236	5.58497	6.62825	12.2579	9.55376	8.17625
ENSMUSG00000048332	108927	Lhfp	lipoma HMGIC fusion partner	protein_coding	2.61557	4.84013	1.29754e-06	4.64521e-05	214	216	237	258	744	675	1643	8.08013	8.10887	8.51215	8.33416	9.63122	8.97449	9.97044
ENSMUSG00000001999	109778	Blvra	biliverdin reductase A	protein_coding	1.74877	4.83444	1.3352e-06	4.76892e-05	431	418	386	410	969	1130	1401	9.02234	8.99756	9.17741	8.96075	10.0017	9.6886	9.74682
ENSMUSG00000108615		Gm4973	predicted gene 4973	processed_pseudogene	8.63962	4.83336	1.34251e-06	4.78942e-05	1	3	5	3	33	37	60	4.10811	4.42245	4.73396	4.41971	5.82669	5.59685	5.87039
ENSMUSG00000028383	72479	Hsdl2	hydroxysteroid dehydrogenase like 2	protein_coding	2.06618	4.82827	1.37723e-06	4.90759e-05	696	633	454	645	1166	1984	3246	9.68699	9.57203	9.40211	9.58774	10.2627	10.4815	10.9347
ENSMUSG00000069516	17105	Lyz2	lysozyme 2	protein_coding	5.48682	4.82762	1.38176e-06	4.918e-05	3994	1972	4547	3619	44078	12798	29877	12.1705	11.1785	12.6768	12.0364	15.4737	13.1491	14.1201
ENSMUSG00000079105	109828	C7	complement component 7	protein_coding	4.56775	4.82696	1.38632e-06	4.92851e-05	72	104	75	59	280	311	1324	6.73743	7.18339	7.04366	6.5216	8.29447	7.93691	9.66773
ENSMUSG00000016194	15483	Hsd11b1	hydroxysteroid 11-beta dehydrogenase 1	protein_coding	6.31789	4.826	1.39302e-06	4.9466e-05	49	86	64	96	1134	263	580	6.31801	6.95694	6.85777	7.07821	10.2234	7.72086	8.53266
ENSMUSG00000031246	56726	Sh3bgrl	SH3-binding domain glutamic acid-rich protein like	protein_coding	2.89901	4.82303	1.41391e-06	5.00337e-05	537	542	643	572	2845	1732	3341	9.3258	9.35609	9.88836	9.42046	11.5318	10.2893	10.9757
ENSMUSG00000022098	12153	Bmp1	bone morphogenetic protein 1	protein_coding	2.14003	4.82173	1.42318e-06	5.03038e-05	2147	1507	1286	1616	5223	5137	6214	11.2819	10.7954	10.869	10.884	12.4026	11.8382	11.8625
ENSMUSG00000033885	218699	Pxk	PX domain containing serine/threonine kinase	protein_coding	2.23537	4.82124	1.42667e-06	5.03692e-05	392	292	276	304	1073	929	1365	8.89237	8.50997	8.71803	8.55407	10.1453	9.41551	9.71038
ENSMUSG00000032035	23871	Ets1	E26 avian leukemia oncogene 1, 5' domain	protein_coding	2.62889	4.81889	1.44357e-06	5.08643e-05	260	223	213	266	1081	727	1141	8.33771	8.15087	8.36907	8.3749	10.1558	9.07642	9.46026
ENSMUSG00000084347		Akt2-ps	thymoma viral proto-oncogene 2, pseudogene	processed_pseudogene	2.86881	4.81706	1.45687e-06	5.11993e-05	136	210	111	179	622	471	1133	7.49817	8.07188	7.52295	7.85417	9.38178	8.48585	9.45048
ENSMUSG00000018171	75909	Vmp1	vacuole membrane protein 1	protein_coding	2.51706	4.81604	1.46439e-06	5.13456e-05	1061	923	773	1296	4208	3085	4567	10.28	10.101	10.1475	10.5704	12.0925	11.1092	11.4218
ENSMUSG00000050900		Gm7327	predicted gene 7327	processed_pseudogene	3.62176	4.81371	1.48154e-06	5.17693e-05	68	40	28	24	160	194	371	6.67298	6.12388	5.98102	5.644	7.56843	7.33889	7.94087
ENSMUSG00000020149	19324	Rab1a	RAB1A, member RAS oncogene family	protein_coding	1.85342	4.81278	1.48845e-06	5.19517e-05	3598	2478	2489	2632	6394	8340	10801	12.0208	11.5047	11.8121	11.5802	12.6932	12.5335	12.6559
ENSMUSG00000001333	68828	Sync	syncoilin	protein_coding	3.9786	4.81225	1.49243e-06	5.20312e-05	50	87	64	70	345	208	813	6.33915	6.97052	6.85777	6.71128	8.57412	7.42509	8.99184
ENSMUSG00000032806	214601	Slc10a3	solute carrier family 10 (sodium/bile acid cotransporter family), member 3	protein_coding	2.03601	4.81036	1.50655e-06	5.2345e-05	127	87	85	117	241	347	462	7.41282	6.97052	7.19376	7.3178	8.09619	8.07997	8.22881
ENSMUSG00000032359	13036	Ctsh	cathepsin H	protein_coding	2.98929	4.80977	1.51105e-06	5.24418e-05	3345	1465	1697	1622	9167	8192	11465	11.9163	10.7552	11.2643	10.8893	13.2113	12.5077	12.7416
ENSMUSG00000096647		Tmem41b-ps	transmembrane protein 41B, pseudogene	processed_pseudogene	4.02764	4.80558	1.543e-06	5.33693e-05	23	17	10	23	53	124	203	5.60361	5.37144	5.14149	5.60788	6.28876	6.806	7.18266
ENSMUSG00000020143	94176	Dock2	dedicator of cyto-kinesis 2	protein_coding	3.38501	4.80485	1.54869e-06	5.34876e-05	183	108	116	159	899	497	778	7.87619	7.22915	7.5784	7.70207	9.89631	8.55815	8.93154
ENSMUSG00000044424		Gm9493	predicted gene 9493	processed_pseudogene	2.40038	4.80469	1.54991e-06	5.34876e-05	360	424	314	254	1140	1038	1779	8.77622	9.01712	8.89377	8.31335	10.2308	9.56998	10.0824
ENSMUSG00000034640	99929	Tiparp	TCDD-inducible poly(ADP-ribose) polymerase	protein_coding	3.19156	4.80298	1.5632e-06	5.38856e-05	255	265	191	305	1534	807	1319	8.31185	8.37991	8.22409	8.5585	10.6513	9.22039	9.66244
ENSMUSG00000032563	94062	Mrpl3	mitochondrial ribosomal protein L3	protein_coding	1.73844	4.80246	1.56726e-06	5.39233e-05	461	451	376	398	879	1107	1653	9.1149	9.10201	9.1412	8.92007	9.86472	9.65984	9.97897
ENSMUSG00000025888	12362	Casp1	caspase 1	protein_coding	2.47158	4.80239	1.56781e-06	5.39233e-05	312	220	207	214	940	763	1072	8.58228	8.13302	8.33095	8.08677	9.95898	9.14299	9.37358
ENSMUSG00000031148	209416	Gpkow	G patch domain and KOW motifs	protein_coding	2.16561	4.80151	1.57475e-06	5.41013e-05	181	264	209	213	604	652	1069	7.86198	8.37486	8.34377	8.08063	9.34103	8.92699	9.36969
ENSMUSG00000034855	15945	Cxcl10	chemokine (C-X-C motif) ligand 10	protein_coding	8.43302	4.7997	1.58906e-06	5.45315e-05	105	51	41	68	1512	339	350	7.17975	6.37324	6.36486	6.67866	10.6307	8.04939	7.86534
ENSMUSG00000047798	246746	Cd300lf	CD300 molecule like family member F	protein_coding	30.077	4.79551	1.62261e-06	5.53731e-05	36	27	12	34	2430	375	243	6.00832	5.75328	5.26898	5.95844	11.3065	8.18215	7.40294
ENSMUSG00000040710	20452	St8sia4	ST8 alpha-N-acetyl-neuraminide alpha-2,8-sialyltransferase 4	protein_coding	2.94457	4.78883	1.6776e-06	5.71074e-05	75	55	44	62	297	223	281	6.78389	6.45374	6.43996	6.57594	8.37302	7.51201	7.58475
ENSMUSG00000058427	20310	Cxcl2	chemokine (C-X-C motif) ligand 2	protein_coding	29.5466	4.78866	1.67903e-06	5.71074e-05	55	255	213	240	14847	6864	1167	6.44023	8.3286	8.36907	8.23805	13.9054	12.2538	9.49162
ENSMUSG00000066800	24014	Rnasel	ribonuclease L (2', 5'-oligoisoadenylate synthetase-dependent)	protein_coding	4.20728	4.78697	1.69318e-06	5.73978e-05	198	107	212	164	1442	653	1202	7.97849	7.21785	8.36278	7.74164	10.5635	8.92909	9.53279
ENSMUSG00000034998	14236	Foxn2	forkhead box N2	protein_coding	2.04921	4.78522	1.70797e-06	5.7835e-05	152	203	138	161	433	470	742	7.63836	8.02747	7.79965	7.71803	8.88265	8.48299	8.86675
ENSMUSG00000061477	20115	Rps7	ribosomal protein S7	protein_coding	2.34825	4.77895	1.76211e-06	5.92104e-05	736	1081	737	757	2688	2343	4485	9.76521	10.3241	10.0803	9.81173	11.4507	10.7175	11.3959
ENSMUSG00000022844	72599	Pdia5	protein disulfide isomerase associated 5	protein_coding	2.25364	4.77831	1.76779e-06	5.93362e-05	326	173	194	236	675	839	1031	8.64159	7.81989	8.24474	8.21579	9.49548	9.27418	9.31949
ENSMUSG00000070420	666311	Zscan25	zinc finger and SCAN domain containing 25	protein_coding	3.42638	4.77731	1.77656e-06	5.95652e-05	32	41	38	23	96	183	325	5.89661	6.14853	6.28542	5.60788	6.9462	7.2673	7.7699
ENSMUSG00000029005	70433	Draxin	dorsal inhibitory axon guidance protein	protein_coding	6.7193	4.7678	1.86244e-06	6.20376e-05	27	56	23	39	596	207	199	5.74212	6.47315	5.79807	6.09134	9.32254	7.4191	7.15863
ENSMUSG00000015134	56847	Aldh1a3	aldehyde dehydrogenase family 1, subfamily A3	protein_coding	2.38911	4.76003	1.93561e-06	6.39879e-05	377	213	211	291	966	961	1157	8.83909	8.0905	8.35647	8.49525	9.99735	9.4626	9.47964
ENSMUSG00000039480	319638	Nt5dc1	5'-nucleotidase domain containing 1	protein_coding	2.2986	4.75853	1.95008e-06	6.42583e-05	79	118	80	87	268	287	477	6.84354	7.33751	7.12069	6.96169	8.23632	7.83295	8.27118
ENSMUSG00000014873	20931	Surf2	surfeit gene 2	protein_coding	1.98449	4.75704	1.96455e-06	6.46655e-05	179	239	136	166	404	596	767	7.84763	8.24248	7.78089	7.75716	8.78809	8.80435	8.91205
ENSMUSG00000022876	67742	Samsn1	SAM domain, SH3 domain and nuclear localization signals, 1	protein_coding	10.2341	4.7501	2.03313e-06	6.67079e-05	54	27	24	58	1157	302	151	6.4206	5.75328	5.83676	6.503	10.2517	7.89881	6.83316
ENSMUSG00000062098	228662	Btbd3	BTB (POZ) domain containing 3	protein_coding	2.1168	4.74651	2.0696e-06	6.76871e-05	761	532	456	426	1351	1894	2441	9.81202	9.33027	9.40822	9.01326	10.4711	10.4158	10.5296
ENSMUSG00000020521	76892	Rnft1	ring finger protein, transmembrane 1	protein_coding	2.28115	4.74292	2.10665e-06	6.88253e-05	209	282	210	249	652	670	1395	8.04914	8.46316	8.35014	8.28691	9.44723	8.9643	9.74081
ENSMUSG00000032000	11796	Birc3	baculoviral IAP repeat-containing 3	protein_coding	2.80375	4.74169	2.11939e-06	6.90944e-05	280	259	242	274	1355	850	1186	8.43675	8.34934	8.54025	8.41452	10.4753	9.29221	9.51411
ENSMUSG00000026842	11350	Abl1	c-abl oncogene 1, non-receptor tyrosine kinase	protein_coding	1.67985	4.73825	2.15566e-06	7.02023e-05	643	680	442	612	1199	1554	2149	9.57635	9.67206	9.36492	9.51452	10.3021	10.1362	10.3492
ENSMUSG00000032570	235574	Atp2c1	ATPase, Ca++-sequestering	protein_coding	1.60462	4.73572	2.18274e-06	7.09333e-05	703	740	611	685	1419	1748	2204	9.70099	9.79043	9.81673	9.67179	10.5407	10.3023	10.3849
ENSMUSG00000028869	230737	Gnl2	guanine nucleotide binding protein-like 2 (nucleolar)	protein_coding	1.48454	4.73487	2.19191e-06	7.11559e-05	778	767	594	767	1254	1842	2224	9.84301	9.84068	9.77717	9.83013	10.3656	10.3764	10.3977
ENSMUSG00000031441	50770	Atp11a	ATPase, class VI, type 11A	protein_coding	2.22969	4.73455	2.19537e-06	7.11928e-05	414	451	329	409	1387	1081	1774	8.96712	9.10201	8.95764	8.9574	10.5083	9.62663	10.0784
ENSMUSG00000020064	67345	Herc4	hect domain and RLD 4	protein_coding	1.71828	4.73167	2.22677e-06	7.21345e-05	566	619	488	638	1336	1489	1991	9.39878	9.54084	9.50256	9.57252	10.4552	10.0759	10.2412
ENSMUSG00000003623	74114	Crot	carnitine O-octanoyltransferase	protein_coding	2.11914	4.73018	2.24322e-06	7.25909e-05	270	366	270	289	686	902	1623	8.38808	8.81586	8.68821	8.48599	9.51799	9.37455	9.95322
ENSMUSG00000028128	14066	F3	coagulation factor III	protein_coding	2.83695	4.72859	2.26083e-06	7.30834e-05	687	624	615	791	3503	2022	3354	9.66879	9.55206	9.82588	9.87337	11.8297	10.5084	10.9813
ENSMUSG00000015355	12506	Cd48	CD48 antigen	protein_coding	3.77109	4.72762	2.27168e-06	7.32795e-05	76	65	78	81	573	266	441	6.79904	6.63661	7.09038	6.8783	9.26803	7.73536	8.1673
ENSMUSG00000038102	320714	Trappc11	trafficking protein particle complex 11	protein_coding	1.77172	4.72602	2.28962e-06	7.37807e-05	414	349	308	462	797	1062	1499	8.96712	8.75112	8.86741	9.12485	9.72745	9.60187	9.84159
ENSMUSG00000037347	60322	Chst7	carbohydrate (N-acetylglucosamino) sulfotransferase 7	protein_coding	2.88033	4.72319	2.32179e-06	7.47387e-05	56	28	47	49	168	176	299	6.45959	5.78581	6.51119	6.3233	7.63011	7.2198	7.66341
ENSMUSG00000066632		Pgk1-rs7	phosphoglycerate kinase-1, related sequence-7	processed_pseudogene	7.83719	4.72117	2.34486e-06	7.52443e-05	7	5	3	10	53	34	163	4.79285	4.63238	4.50295	5.00063	6.28876	5.52687	6.92182
ENSMUSG00000020573	30955	Pik3cg	phosphatidylinositol-4,5-bisphosphate 3-kinase catalytic subunit gamma	protein_coding	4.10923	4.7203	2.35495e-06	7.53312e-05	51	39	30	45	349	180	215	6.35997	6.09876	6.04765	6.2352	8.58967	7.24714	7.2524
ENSMUSG00000083945		Gm15242	predicted gene 15242	processed_pseudogene	12.8118	4.71742	2.38857e-06	7.62477e-05	18	3	2	5	213	68	86	5.40566	4.42245	4.3545	4.62892	7.93481	6.15845	6.22068
ENSMUSG00000054263	16880	Lifr	LIF receptor alpha	protein_coding	2.21816	4.7167	2.39698e-06	7.64364e-05	395	481	369	532	1492	1238	1970	8.9028	9.19082	9.1153	9.31984	10.6118	9.81643	10.2263
ENSMUSG00000022443	17886	Myh9	myosin, heavy polypeptide 9, non-muscle	protein_coding	1.99663	4.7162	2.40296e-06	7.65474e-05	4983	3303	2729	3590	9212	13171	12692	12.4881	11.9162	11.944	12.0248	13.2183	13.1904	12.8878
ENSMUSG00000094257		Ap3s1-ps2	adaptor-related protein complex 3, sigma 1 subunit, pseudogene 2	processed_pseudogene	15.1682	4.7153	2.41354e-06	7.67251e-05	0	1	3	4	55	25	64	3.67762	4.11081	4.50295	4.53147	6.32734	5.28906	5.93064
ENSMUSG00000022221	56532	Ripk3	receptor-interacting serine-threonine kinase 3	protein_coding	3.78418	4.70783	2.50369e-06	7.94261e-05	250	102	111	117	1003	712	755	8.28551	7.15994	7.52295	7.3178	10.0503	9.04775	8.89048
ENSMUSG00000084989	381284	Crocc2	ciliary rootlet coiled-coil, rootletin family member 2	protein_coding	19.2943	4.70696	2.51443e-06	7.96844e-05	4	0	3	3	128	29	43	4.52938	3.67762	4.50295	4.41971	7.29106	5.4006	5.57755
ENSMUSG00000019850	21929	Tnfaip3	tumor necrosis factor, alpha-induced protein 3	protein_coding	5.47999	4.70624	2.52327e-06	7.98818e-05	82	130	89	111	1382	393	599	6.88667	7.45751	7.24963	7.25336	10.5032	8.24419	8.5761
ENSMUSG00000017132	19157	Cyth1	cytohesin 1	protein_coding	1.76427	4.70552	2.53221e-06	8.00822e-05	718	620	594	777	1621	1826	2343	9.73053	9.54309	9.77717	9.84831	10.7296	10.364	10.4715
ENSMUSG00000113521		Gm29787	predicted gene, 29787	processed_pseudogene	9.53714	4.69835	2.62271e-06	8.28587e-05	3	4	1	3	17	49	70	4.41788	4.5346	4.15842	4.41971	5.28265	5.84354	6.01617
ENSMUSG00000026535	26388	Ifi202b	interferon activated gene 202B	protein_coding	5.17811	4.6947	2.66992e-06	8.40901e-05	109	147	90	150	1537	580	553	7.22507	7.61192	7.26326	7.62798	10.654	8.76731	8.46858
ENSMUSG00000097245		Gm5421	predicted gene 5421	processed_pseudogene	3.30115	4.69301	2.69218e-06	8.45306e-05	67	141	113	127	446	390	1046	6.6564	7.55931	7.54539	7.4191	8.92311	8.23404	9.33951
ENSMUSG00000113637		Gm7049	predicted gene 7049	processed_pseudogene	2.72817	4.69007	2.73116e-06	8.55563e-05	121	83	88	146	273	423	844	7.35294	6.91541	7.23587	7.59378	8.26084	8.342	9.04323
ENSMUSG00000005142	17159	Man2b1	mannosidase 2, alpha B1	protein_coding	2.3111	4.68698	2.77262e-06	8.66923e-05	1840	998	971	1133	3959	4400	5300	11.0617	10.2113	10.4699	10.38	12.005	11.6165	11.6347
ENSMUSG00000025648	270198	Pfkfb4	6-phosphofructo-2-kinase/fructose-2,6-biphosphatase 4	protein_coding	2.055	4.68102	2.8545e-06	8.89751e-05	434	344	349	430	1139	1040	1697	9.03187	8.73151	9.03863	9.0261	10.2296	9.57266	10.0159
ENSMUSG00000031167	19652	Rbm3	RNA binding motif (RNP1, RRM) protein 3	protein_coding	1.93282	4.68084	2.85696e-06	8.89751e-05	496	646	421	408	1081	1648	1998	9.21587	9.6004	9.29743	8.95405	10.1558	10.219	10.2462
ENSMUSG00000028124	14630	Gclm	glutamate-cysteine ligase, modifier subunit	protein_coding	2.02166	4.67979	2.87164e-06	8.9253e-05	229	359	243	286	734	854	1174	8.1693	8.78955	8.54581	8.47198	9.61232	9.29872	9.49995
ENSMUSG00000024986	15242	Hhex	hematopoietically expressed homeobox	protein_coding	3.13454	4.67947	2.87623e-06	8.93029e-05	75	49	67	54	328	217	364	6.78389	6.33116	6.91094	6.42601	8.50606	7.47787	7.91613
ENSMUSG00000020260	80294	Pofut2	protein O-fucosyltransferase 2	protein_coding	1.92614	4.67743	2.90498e-06	9.00134e-05	591	523	407	521	1373	1305	2070	9.45886	9.30662	9.25061	9.2909	10.494	9.8904	10.2962
ENSMUSG00000022146	18414	Osmr	oncostatin M receptor	protein_coding	3.3055	4.66668	3.06105e-06	9.39938e-05	311	255	238	391	1901	931	1624	8.57795	8.3286	8.51782	8.8958	10.9563	9.4185	9.95408
ENSMUSG00000079339	667373	Ifit1bl1	interferon induced protein with tetratricpeptide repeats 1B like 1	protein_coding	23.7627	4.66589	3.07278e-06	9.421e-05	1	1	1	1	47	17	45	4.10811	4.11081	4.15842	4.10919	6.16601	5.02689	5.6157
ENSMUSG00000031165	22376	Was	Wiskott-Aldrich syndrome	protein_coding	4.88741	4.6651	3.08466e-06	9.4435e-05	72	42	56	30	523	217	353	6.73743	6.17275	6.70529	5.84162	9.1419	7.47787	7.87638
ENSMUSG00000028771	19248	Ptpn12	protein tyrosine phosphatase, non-receptor type 12	protein_coding	2.27514	4.65535	3.23425e-06	9.85225e-05	470	549	415	443	1717	1332	1991	9.14154	9.3739	9.27755	9.06704	10.8114	9.91916	10.2412
ENSMUSG00000028675	52830	Pnrc2	proline-rich nuclear receptor coactivator 2	protein_coding	1.93823	4.65339	3.26524e-06	9.91706e-05	602	785	575	722	1658	1751	3009	9.48453	9.87324	9.73164	9.7454	10.7617	10.3047	10.8268
ENSMUSG00000062991	211323	Nrg1	neuregulin 1	protein_coding	5.95502	4.65111	3.30148e-06	0.000100172	29	33	14	62	442	228	194	5.80613	5.93729	5.38378	6.57594	8.91078	7.53985	7.12802
ENSMUSG00000038417	103199	Fig4	FIG4 phosphoinositide 5-phosphatase	protein_coding	2.16939	4.64933	3.33019e-06	0.000100943	126	140	116	127	337	353	690	7.40302	7.55035	7.5784	7.4191	8.54249	8.10248	8.76771
ENSMUSG00000072889	100978	Nfxl1	nuclear transcription factor, X-box binding-like 1	protein_coding	2.11639	4.64901	3.33527e-06	0.000100997	174	129	135	111	364	448	625	7.81111	7.44789	7.77142	7.25336	8.64655	8.41871	8.6335
ENSMUSG00000011008	68279	Mcoln2	mucolipin 2	protein_coding	5.88866	4.64802	3.35132e-06	0.000101383	94	31	46	59	791	252	395	7.04712	5.87878	6.48786	6.5216	9.71687	7.6664	8.02259
ENSMUSG00000026395	19264	Ptprc	protein tyrosine phosphatase, receptor type, C	protein_coding	6.66026	4.64601	3.3842e-06	0.000102076	240	132	153	193	3181	644	1033	8.23134	7.47657	7.93303	7.95178	11.6916	8.9101	9.32217
ENSMUSG00000072594		Gm16439	predicted pseudogene 16439	processed_pseudogene	4.00632	4.64509	3.39928e-06	0.000102329	49	82	54	72	393	174	688	6.31801	6.90129	6.66443	6.74317	8.75053	7.20593	8.76377
ENSMUSG00000020115	56480	Tbk1	TANK-binding kinase 1	protein_coding	2.15636	4.64405	3.41646e-06	0.000102745	240	318	205	250	798	707	1115	8.23134	8.625	8.31802	8.29224	9.7292	9.03807	9.42821
ENSMUSG00000021482	66129	Prxl2c	peroxiredoxin like 2C	protein_coding	1.74063	4.64326	3.42958e-06	0.000103039	415	484	368	452	995	1105	1544	8.97043	9.19941	9.11156	9.09471	10.039	9.65732	9.88311
ENSMUSG00000030142	56619	Clec4e	C-type lectin domain family 4, member e	protein_coding	30.0466	4.64172	3.45515e-06	0.000103705	32	25	22	45	2855	418	208	5.89661	5.68565	5.7582	6.2352	11.5369	8.32615	7.21213
ENSMUSG00000032369	22038	Plscr1	phospholipid scramblase 1	protein_coding	4.64305	4.64089	3.46909e-06	0.000104022	72	52	65	36	558	218	399	6.73743	6.39381	6.87572	6.0132	9.23134	7.48362	8.03577
ENSMUSG00000041361	102371	Myzap	myocardial zonula adherens protein	protein_coding	3.18097	4.63795	3.51876e-06	0.000105202	175	92	76	59	324	535	746	7.81849	7.03652	7.0594	6.5216	8.48957	8.65769	8.8741
ENSMUSG00000058163	432555	Gm5431	predicted gene 5431	protein_coding	7.43139	4.63605	3.55139e-06	0.000106074	11	5	5	6	103	35	87	5.0575	4.63238	4.73396	4.71614	7.02913	5.55063	6.23249
ENSMUSG00000060989		Gm11847	predicted gene 11847	processed_pseudogene	4.45166	4.63407	3.58552e-06	0.000106846	7	17	18	8	75	103	96	4.79285	5.37144	5.58497	4.86873	6.66334	6.59698	6.33442
ENSMUSG00000024677	69774	Ms4a6b	membrane-spanning 4-domains, subfamily A, member 6B	protein_coding	7.30367	4.63255	3.61181e-06	0.00010746	145	46	105	123	1964	362	882	7.57871	6.26551	7.45345	7.37944	11.0028	8.13561	9.10382
ENSMUSG00000040522	170744	Tlr8	toll-like receptor 8	protein_coding	24.1064	4.62807	3.69085e-06	0.000109705	0	3	0	1	40	22	51	3.67762	4.42245	3.67762	4.10919	6.00713	5.19779	5.7237
ENSMUSG00000112148	14728	Lilrb4a	leukocyte immunoglobulin-like receptor, subfamily B, member 4A	protein_coding	15.4765	4.62678	3.714e-06	0.000110231	2	12	21	6	465	127	73	4.28421	5.1227	5.71705	4.71614	8.98026	6.83347	6.05696
ENSMUSG00000040093	171543	Bmf	BCL2 modifying factor	protein_coding	2.89531	4.62668	3.71574e-06	0.000110231	165	185	97	116	673	435	792	7.74294	7.90656	7.35518	7.30726	9.49135	8.37933	8.95596
ENSMUSG00000098404		Mrip-ps	Mom radiation induced polyposis, pseudogene	unprocessed_pseudogene	6.03074	4.62468	3.75179e-06	0.000111193	10	15	5	13	75	45	207	4.9975	5.27829	4.73396	5.17181	6.66334	5.76645	7.20629
ENSMUSG00000006673	69232	Qrich1	glutamine-rich 1	protein_coding	1.95733	4.62419	3.76069e-06	0.000111333	369	496	256	411	894	1156	1621	8.80985	9.23325	8.61613	8.96409	9.88848	9.72042	9.95148
ENSMUSG00000028015	229445	Ctso	cathepsin O	protein_coding	3.06541	4.62357	3.77195e-06	0.000111467	118	136	145	173	745	413	926	7.32204	7.51393	7.86344	7.81021	9.6331	8.31013	9.17093
ENSMUSG00000100309		Gm6644	predicted gene 6644	processed_pseudogene	2.69548	4.62222	3.79653e-06	0.000112086	42	27	35	48	133	138	234	6.16009	5.75328	6.20107	6.3018	7.33812	6.92984	7.35626
ENSMUSG00000015839	18024	Nfe2l2	nuclear factor, erythroid derived 2, like 2	protein_coding	2.26322	4.62031	3.83167e-06	0.000113014	809	992	877	1006	3357	2644	3873	9.89786	10.2027	10.3258	10.2119	11.7687	10.8894	11.1864
ENSMUSG00000030247	16523	Kcnj8	potassium inwardly-rectifying channel, subfamily J, member 8	protein_coding	2.9667	4.61517	3.92782e-06	0.000115516	64	115	48	89	322	263	548	6.60542	7.30586	6.53415	6.98842	8.48125	7.72086	8.45639
ENSMUSG00000029093	81840	Sorcs2	sortilin-related VPS10 domain containing receptor 2	protein_coding	2.82886	4.61452	3.94012e-06	0.000115767	145	101	54	69	249	508	538	7.57871	7.14807	6.66443	6.69507	8.13916	8.58768	8.4317
ENSMUSG00000067714	381810	Lpar5	lysophosphatidic acid receptor 5	protein_coding	5.69185	4.61034	4.02008e-06	0.00011789	22	13	2	8	62	103	151	5.56648	5.17698	4.3545	4.86873	6.45442	6.59698	6.83316
ENSMUSG00000050860	237928	Phospho1	phosphatase, orphan 1	protein_coding	3.5158	4.60971	4.03239e-06	0.000118138	47	136	74	104	338	377	906	6.27473	7.51393	7.02773	7.1743	8.54648	8.18917	9.14081
ENSMUSG00000067869		Tcea1-ps1	transcription elongation factor A (SII) 1, pseudogene 1	processed_pseudogene	3.69681	4.60703	4.08469e-06	0.000119328	28	40	15	29	134	100	274	5.77452	6.12388	5.43727	5.81072	7.34735	6.56439	7.55295
ENSMUSG00000021908		Ncoa4-ps	nuclear receptor coactivator 4, pseudogene	processed_pseudogene	6.24355	4.60679	4.08925e-06	0.000119348	39	22	6	11	149	101	347	6.08635	5.57693	4.82993	5.06075	7.47904	6.57534	7.85422
ENSMUSG00000003153	20527	Slc2a3	solute carrier family 2 (facilitated glucose transporter), member 3	protein_coding	5.03294	4.60627	4.09962e-06	0.000119536	73	90	59	99	926	480	284	6.75308	7.01049	6.76443	7.11501	9.93788	8.51129	7.59816
ENSMUSG00000028980	100198	H6pd	hexose-6-phosphate dehydrogenase (glucose 1-dehydrogenase)	protein_coding	3.08445	4.60469	4.13087e-06	0.000120105	557	379	352	666	2643	1453	2841	9.37652	8.86348	9.05039	9.63248	11.4265	10.0415	10.7451
ENSMUSG00000029231	18595	Pdgfra	platelet derived growth factor receptor, alpha polypeptide	protein_coding	3.36022	4.6041	4.14261e-06	0.000120332	466	366	376	602	2999	1441	2382	9.12976	8.81586	9.1412	9.49157	11.6072	10.0298	10.4949
ENSMUSG00000022651	245195	Retnlg	resistin like gamma	protein_coding	177.89	4.60331	4.15836e-06	0.000120675	10	2	6	25	6495	83	141	4.9975	4.28798	4.82993	5.67913	12.7157	6.3637	6.75475
ENSMUSG00000118252		Gm5521	predicted gene 5521	processed_pseudogene	7.31813	4.60184	4.18775e-06	0.000121413	1	5	4	4	35	34	57	4.10811	4.63238	4.62649	4.53147	5.88082	5.52687	5.82331
ENSMUSG00000026181	68606	Ppm1f	protein phosphatase 1F (PP2C domain containing)	protein_coding	2.03403	4.60056	4.21347e-06	0.000122043	314	257	264	318	793	756	1327	8.5909	8.33901	8.65776	8.61484	9.7204	9.13029	9.67089
ENSMUSG00000001847	19353	Rac1	Rac family small GTPase 1	protein_coding	1.75978	4.59849	4.25558e-06	0.000123146	4041	3836	3402	3930	9581	9742	12859	12.1873	12.1307	12.2602	12.1546	13.2748	12.7567	12.9066
ENSMUSG00000034422	547253	Parp14	poly (ADP-ribose) polymerase family, member 14	protein_coding	4.5993	4.59509	4.32556e-06	0.000124936	286	180	201	321	2610	854	1396	8.46518	7.87108	8.29181	8.62753	11.4086	9.29872	9.74181
ENSMUSG00000053318	74748	Slamf8	SLAM family member 8	protein_coding	13.089	4.59317	4.36574e-06	0.000125859	36	16	9	12	704	82	117	6.00832	5.32579	5.07183	5.11769	9.55409	6.35094	6.54644
ENSMUSG00000027208	14178	Fgf7	fibroblast growth factor 7	protein_coding	5.59407	4.58267	4.59072e-06	0.000131575	36	87	85	107	940	254	802	6.00832	6.97052	7.19376	7.20873	9.95898	7.67645	8.97316
ENSMUSG00000111394		Gm49759	predicted gene, 49759	TEC	6.6102	4.58157	4.61503e-06	0.000131982	9	23	11	4	148	115	86	4.93383	5.61422	5.20703	4.53147	7.47063	6.72021	6.22068
ENSMUSG00000028005	54195	Gucy1b1	guanylate cyclase 1, soluble, beta 1	protein_coding	3.28159	4.58148	4.6169e-06	0.000131982	25	35	14	19	82	104	196	5.67475	5.99331	5.38378	5.45189	6.76409	6.60768	7.14034
ENSMUSG00000060090	19889	Rp2	retinitis pigmentosa 2 homolog	protein_coding	3.66619	4.58069	4.63452e-06	0.000132236	48	89	76	49	430	242	463	6.29654	6.99729	7.0594	6.3233	8.87315	7.61502	8.23167
ENSMUSG00000084329		Gm6733	predicted gene 6733	processed_pseudogene	4.13729	4.58034	4.64229e-06	0.000132236	32	43	13	22	118	118	339	5.89661	6.19654	5.32778	5.57068	7.19201	6.74939	7.82413
ENSMUSG00000043017	19222	Ptgir	prostaglandin I receptor (IP)	protein_coding	5.40616	4.5803	4.64304e-06	0.000132236	33	16	42	42	367	124	340	5.92543	5.32579	6.39035	6.16518	8.65767	6.806	7.82792
ENSMUSG00000031015	20947	Swap70	SWA-70 protein	protein_coding	2.07716	4.57843	4.6847e-06	0.000133175	458	296	295	368	1067	1092	1351	9.1059	8.52828	8.80858	8.81304	10.1374	9.64078	9.69596
ENSMUSG00000048677	233979	Tpcn2	two pore segment channel 2	protein_coding	2.33772	4.57662	4.72539e-06	0.000133959	241	174	111	167	591	634	675	8.23685	7.82731	7.52295	7.76486	9.31087	8.8887	8.73783
ENSMUSG00000034158	320184	Lrrc58	leucine rich repeat containing 58	protein_coding	2.123	4.57641	4.73028e-06	0.000133974	271	373	227	341	879	825	1414	8.39303	8.8417	8.45425	8.70941	9.86472	9.25089	9.75976
ENSMUSG00000030579	22177	Tyrobp	TYRO protein tyrosine kinase binding protein	protein_coding	4.90013	4.5759	4.74172e-06	0.000134174	804	329	638	640	6867	2414	3496	9.88915	8.67103	9.8774	9.57688	12.7958	10.76	11.0404
ENSMUSG00000029847	243753	Slc23a4	solute carrier family 23 member 4	protein_coding	6.25548	4.57348	4.79685e-06	0.000135483	28	5	6	9	119	92	137	5.77452	4.63238	4.82993	4.93682	7.20223	6.47356	6.72211
ENSMUSG00000029999	21802	Tgfa	transforming growth factor alpha	protein_coding	3.01866	4.56952	4.88835e-06	0.000137561	516	219	262	302	1640	1330	1555	9.27054	8.12702	8.64746	8.54518	10.7462	9.91705	9.89308
ENSMUSG00000022514	16180	Il1rap	interleukin 1 receptor accessory protein	protein_coding	2.8427	4.56585	4.97485e-06	0.00013961	136	161	158	146	782	510	684	7.49817	7.72764	7.97487	7.59378	9.70086	8.59299	8.75584
ENSMUSG00000020432	21452	Tcn2	transcobalamin 2	protein_coding	2.44906	4.56169	5.07424e-06	0.00014188	889	552	696	944	2875	2274	3885	10.0305	9.38147	9.9997	10.1222	11.5468	10.6751	11.1908
ENSMUSG00000107066		Gm4482	predicted gene 4482	processed_pseudogene	3.47773	4.56048	5.10372e-06	0.000142574	26	17	9	16	72	78	140	5.70888	5.37144	5.07183	5.32019	6.61783	6.29865	6.74666
ENSMUSG00000025887	12364	Casp12	caspase 12	protein_coding	3.95075	4.55525	5.23224e-06	0.000145898	105	104	105	121	876	294	780	7.17975	7.18339	7.45345	7.35919	9.85992	7.86406	8.93505
ENSMUSG00000036862	233651	Dchs1	dachsous cadherin related 1	protein_coding	2.472	4.55394	5.26494e-06	0.000146406	136	75	119	132	404	412	573	7.49817	6.79827	7.61066	7.46718	8.78809	8.3069	8.51631
ENSMUSG00000024789	16452	Jak2	Janus kinase 2	protein_coding	2.97188	4.55376	5.26956e-06	0.000146406	339	395	254	372	1915	1018	1623	8.69456	8.92	8.60553	8.82778	10.9668	9.54285	9.95322
ENSMUSG00000032324	56434	Tspan3	tetraspanin 3	protein_coding	1.64035	4.55263	5.29799e-06	0.000147062	2057	2264	2085	1994	4179	5984	6893	11.2207	11.3756	11.5586	11.1836	12.0826	12.057	12.0112
ENSMUSG00000022867	30940	Usp25	ubiquitin specific peptidase 25	protein_coding	1.78216	4.55186	5.31737e-06	0.000147467	1002	903	926	1143	2110	2605	4126	10.1991	10.0702	10.4027	10.3924	11.105	10.8683	11.2767
ENSMUSG00000020826	18126	Nos2	nitric oxide synthase 2, inducible	protein_coding	95.7018	4.54931	5.38228e-06	0.000149132	12	13	1	8	2629	92	119	5.11432	5.17698	4.15842	4.86873	11.4189	6.47356	6.56504
ENSMUSG00000038774	77987	Ascc3	activating signal cointegrator 1 complex subunit 3	protein_coding	2.17061	4.54881	5.39512e-06	0.000149353	203	211	139	121	465	568	755	8.01103	8.07811	7.80894	7.35919	8.98026	8.73888	8.89048
ENSMUSG00000072941	20657	Sod3	superoxide dismutase 3, extracellular	protein_coding	3.95417	4.54727	5.43456e-06	0.000150173	990	583	1017	1546	7880	3418	7471	10.1821	9.4574	10.5356	10.821	12.9936	11.2555	12.1266
ENSMUSG00000062960	16542	Kdr	kinase insert domain protein receptor	protein_coding	1.98037	4.54636	5.45808e-06	0.000150687	366	258	247	409	658	1139	1363	8.79872	8.34419	8.56781	8.9574	9.45998	9.69969	9.70833
ENSMUSG00000046691	214987	Chtf8	CTF8, chromosome transmission fidelity factor 8	protein_coding	9.05997	4.54488	5.49677e-06	0.000151619	4	1	4	10	46	36	140	4.52938	4.11081	4.62649	5.00063	6.14443	5.57395	6.74666
ENSMUSG00000003617	12870	Cp	ceruloplasmin	protein_coding	4.96062	4.54183	5.57673e-06	0.00015341	591	180	454	458	4420	1502	3474	9.45886	7.87108	9.40211	9.11287	12.163	10.0882	11.0314
ENSMUSG00000101389	666907	Ms4a4a	membrane-spanning 4-domains, subfamily A, member 4A	protein_coding	6.42971	4.54103	5.59795e-06	0.000153856	201	62	105	90	1828	687	531	7.99811	6.58423	7.45345	7.0016	10.9006	8.99866	8.41417
ENSMUSG00000025044	20288	Msr1	macrophage scavenger receptor 1	protein_coding	7.92999	4.54074	5.60569e-06	0.00015386	119	29	79	64	1544	316	520	7.33241	5.81754	7.10562	6.61103	10.6605	7.95766	8.38617
ENSMUSG00000025268	80884	Maged2	melanoma antigen, family D, 2	protein_coding	1.89432	4.54065	5.60813e-06	0.00015386	554	414	366	387	910	1250	1920	9.36903	8.98437	9.10405	8.88174	9.91339	9.82996	10.19
ENSMUSG00000002320	74140	Tm9sf1	transmembrane 9 superfamily member 1	protein_coding	1.71883	4.53205	5.84142e-06	0.000159546	595	570	422	443	972	1470	1898	9.46825	9.42604	9.30071	9.06704	10.0061	10.0578	10.1737
ENSMUSG00000056529	19204	Ptafr	platelet-activating factor receptor	protein_coding	3.2855	4.53047	5.88535e-06	0.000160602	241	136	243	298	1381	877	1230	8.23685	7.51393	8.54581	8.52722	10.5022	9.33555	9.56489
ENSMUSG00000093402		Gm18588	predicted gene, 18588	processed_pseudogene	20.5453	4.52552	6.02471e-06	0.000164113	2	9	0	0	55	37	197	4.28421	4.94129	3.67762	3.67762	6.32734	5.59685	7.14647
ENSMUSG00000031010	22284	Usp9x	ubiquitin specific peptidase 9, X chromosome	protein_coding	3.07827	4.52435	6.05817e-06	0.000164732	77	120	87	82	247	339	900	6.81403	7.35822	7.22197	6.89255	8.12853	8.04939	9.13165
ENSMUSG00000038642	13040	Ctss	cathepsin S	protein_coding	6.14051	4.52166	6.13553e-06	0.00016654	2686	822	1446	1684	25791	6885	9437	11.602	9.93793	11.036	10.9427	14.7011	12.2582	12.4619
ENSMUSG00000035212	230514	Leprot	leptin receptor overlapping transcript	protein_coding	1.63472	4.52108	6.15249e-06	0.000166739	1261	1321	1161	1512	2707	3262	4597	10.5244	10.6082	10.7235	10.7894	11.4607	11.1888	11.4312
ENSMUSG00000047370		Gm7367	predicted pseudogene 7367	processed_pseudogene	2.19542	4.52104	6.15376e-06	0.000166739	145	133	72	97	325	391	460	7.57871	7.486	6.99534	7.09058	8.49371	8.23743	8.22306
ENSMUSG00000003505	26438	Psg18	pregnancy specific glycoprotein 18	protein_coding	36.6016	4.51857	6.22597e-06	0.000168547	1	2	0	0	65	19	32	4.10811	4.28798	3.67762	3.67762	6.50549	5.09849	5.34354
ENSMUSG00000042215	213539	Bag2	BCL2-associated athanogene 2	protein_coding	2.1618	4.51325	6.38422e-06	0.000172526	152	188	120	114	324	487	755	7.63836	7.92743	7.62125	7.28594	8.48957	8.53077	8.89048
ENSMUSG00000001440	16211	Kpnb1	karyopherin (importin) beta 1	protein_coding	1.595	4.51166	6.43221e-06	0.000173517	2872	2513	1961	2402	4404	7341	7357	11.6979	11.5248	11.4709	11.4495	12.1578	12.3502	12.1046
ENSMUSG00000103206		Gm8515	predicted gene 8515	processed_pseudogene	2.97872	4.51034	6.47225e-06	0.00017429	40	33	12	32	95	141	191	6.11138	5.93729	5.26898	5.90133	6.93394	6.95502	7.10932
ENSMUSG00000083325		Gm14121	predicted gene 14121	transcribed_processed_pseudogene	2.64111	4.50487	6.64151e-06	0.000178691	56	64	62	44	177	190	390	6.45959	6.61937	6.82117	6.21226	7.69646	7.31327	8.00594
ENSMUSG00000036053	71409	Fmnl2	formin-like 2	protein_coding	2.55608	4.50009	6.7925e-06	0.000182593	109	139	99	123	518	380	492	7.22507	7.54133	7.38039	7.37944	9.12866	8.19965	8.31235
ENSMUSG00000020422	319939	Tns3	tensin 3	protein_coding	1.79931	4.4953	6.94723e-06	0.000186262	455	524	355	478	1152	1269	1470	9.09685	9.30926	9.06206	9.17181	10.2456	9.85113	9.81419
ENSMUSG00000042684	74091	Npl	N-acetylneuraminate pyruvate lyase	protein_coding	2.47743	4.49462	6.96945e-06	0.000186369	442	350	410	266	1153	1150	2278	9.05697	8.75501	9.26077	8.3749	10.2468	9.71314	10.4317
ENSMUSG00000035711	27261	Dok3	docking protein 3	protein_coding	4.38937	4.49379	6.99668e-06	0.000186771	117	98	87	149	1136	453	510	7.31158	7.11185	7.22197	7.61951	10.2259	8.43358	8.36024
ENSMUSG00000038521	50908	C1s1	complement component 1, s subcomponent 1	protein_coding	3.20115	4.48893	7.15826e-06	0.000190623	2010	1150	1717	2110	9567	4786	12178	11.1878	10.4117	11.281	11.2643	13.2727	11.7368	12.8284
ENSMUSG00000096403		Rnps1-ps	RNA binding protein with serine rich domain 1, pseudogene	processed_pseudogene	1.62854	4.48519	7.28498e-06	0.000193551	290	241	212	268	492	672	865	8.48383	8.25353	8.36278	8.38491	9.05777	8.96838	9.07703
ENSMUSG00000045551	14293	Fpr1	formyl peptide receptor 1	protein_coding	144.419	4.48473	7.3005e-06	0.000193551	0	5	1	1	813	62	51	3.67762	4.63238	4.15842	4.10919	9.75528	6.06679	5.7237
ENSMUSG00000005505	67136	Kbtbd4	kelch repeat and BTB (POZ) domain containing 4	protein_coding	2.02489	4.48453	7.3075e-06	0.000193551	175	147	127	126	348	406	697	7.81849	7.61192	7.69329	7.40929	8.5858	8.28739	8.78145
ENSMUSG00000115280		Gm7107	predicted gene 7107	processed_pseudogene	20.4822	4.4795	7.48183e-06	0.000197826	3	1	0	0	21	27	55	4.41788	4.11081	3.67762	3.67762	5.44277	5.34614	5.79095
ENSMUSG00000029553	21426	Tfec	transcription factor EC	protein_coding	8.13064	4.4782	7.5275e-06	0.000198862	19	5	22	17	326	85	139	5.44789	4.63238	5.7582	5.36573	8.49784	6.38888	6.73853
ENSMUSG00000050490		Psma5-ps	proteasome subunit alpha 5, pseudogene	processed_pseudogene	1.68374	4.47793	7.53687e-06	0.000198938	332	410	270	376	741	947	1155	8.66628	8.97106	8.68821	8.84237	9.62558	9.44219	9.47723
ENSMUSG00000039087	68750	Rreb1	ras responsive element binding protein 1	protein_coding	1.66667	4.4752	7.63402e-06	0.000201156	326	335	250	310	533	856	1163	8.64159	8.69552	8.5841	8.58043	9.16803	9.30196	9.48684
ENSMUSG00000104713	100702	Gbp6	guanylate binding protein 6	protein_coding	39.2662	4.47421	7.66941e-06	0.000201738	19	10	9	6	1349	50	239	5.44789	5.00528	5.07183	4.71614	10.469	5.86212	7.38239
ENSMUSG00000046201	106583	Scaf8	SR-related CTD-associated factor 8	protein_coding	1.67809	4.47401	7.67666e-06	0.000201738	260	330	248	317	573	797	1026	8.33771	8.67514	8.57326	8.61058	9.26803	9.20316	9.31275
ENSMUSG00000084228		Gm8080	predicted gene 8080	unprocessed_pseudogene	8.72161	4.47385	7.68245e-06	0.000201738	7	7	14	6	81	31	291	4.79285	4.79955	5.38378	4.71614	6.75013	5.45269	7.62898
ENSMUSG00000115379		Gm48990	predicted gene, 48990	processed_pseudogene	10.5324	4.47136	7.77241e-06	0.000203751	3	3	3	0	39	41	31	4.41788	4.42245	4.50295	3.67762	5.98281	5.68447	5.31982
ENSMUSG00000015437	14939	Gzmb	granzyme B	protein_coding	15.5977	4.4703	7.81096e-06	0.000204587	8	2	5	4	221	32	37	4.86588	4.28798	4.73396	4.53147	7.9828	5.47792	5.45551
ENSMUSG00000039813	381605	Tbc1d2	TBC1 domain family, member 2	protein_coding	2.14968	4.47005	7.82023e-06	0.000204588	186	117	117	111	322	547	539	7.89724	7.32704	7.58923	7.25336	8.48125	8.68775	8.43419
ENSMUSG00000040133	381413	Gpr176	G protein-coupled receptor 176	protein_coding	4.70682	4.46993	7.82434e-06	0.000204588	45	13	15	43	239	197	174	6.23002	5.17698	5.43727	6.18892	8.08525	7.3578	6.99847
ENSMUSG00000017670	140579	Elmo2	engulfment and cell motility 2	protein_coding	1.91376	4.46503	8.00577e-06	0.000208266	469	421	253	389	989	1093	1428	9.13861	9.00738	8.6002	8.88879	10.0305	9.64206	9.77356
ENSMUSG00000067547		Gm7666	predicted pseudogene 7666	transcribed_processed_pseudogene	1.58955	4.46415	8.03878e-06	0.000208947	848	753	674	711	1435	1883	2554	9.96403	9.81484	9.95453	9.7239	10.5566	10.4075	10.5938
ENSMUSG00000025804	12768	Ccr1	chemokine (C-C motif) receptor 1	protein_coding	17.369	4.46168	8.13191e-06	0.000211188	62	32	37	105	2886	466	631	6.57037	5.90836	6.25788	7.18587	11.5523	8.47152	8.64642
ENSMUSG00000003581	71673	Rnf215	ring finger protein 215	protein_coding	1.73186	4.46138	8.14346e-06	0.000211309	272	254	187	227	535	686	744	8.39795	8.32336	8.19609	8.1644	9.17319	8.99666	8.87043
ENSMUSG00000084838		Gm10241	predicted pseudogene 10241	processed_pseudogene	4.40485	4.45923	8.22548e-06	0.000213257	13	38	9	14	99	107	193	5.16834	6.07317	5.07183	5.22344	6.98234	6.63928	7.12181
ENSMUSG00000001493	17285	Meox1	mesenchyme homeobox 1	protein_coding	3.857	4.45764	8.28662e-06	0.000214479	51	89	72	108	503	219	763	6.35997	6.99729	6.99534	7.22002	9.08819	7.48934	8.9049
ENSMUSG00000048120	12495	Entpd1	ectonucleoside triphosphate diphosphohydrolase 1	protein_coding	4.35278	4.45476	8.3989e-06	0.000216884	515	199	308	401	3421	1435	1838	9.26785	8.00147	8.86741	8.93035	11.7957	10.0239	10.1284
ENSMUSG00000024507	15488	Hsd17b4	hydroxysteroid (17-beta) dehydrogenase 4	protein_coding	1.87723	4.45235	8.49365e-06	0.000218729	1175	1228	977	1418	2279	3369	5792	10.4243	10.5047	10.4787	10.6982	11.2149	11.2349	11.7618
ENSMUSG00000039934	212167	Gsap	gamma-secretase activating protein	protein_coding	5.23115	4.4463	8.73636e-06	0.000224226	61	56	31	76	694	270	243	6.55251	6.47315	6.07977	6.80484	9.53415	7.75447	7.40294
ENSMUSG00000043263	236312	Ifi209	interferon activated gene 209	protein_coding	6.46813	4.44557	8.76604e-06	0.000224799	86	28	41	43	795	180	364	6.9422	5.78581	6.36486	6.18892	9.72393	7.24714	7.91613
ENSMUSG00000024437		Gm8615	predicted pseudogene 8615	transcribed_processed_pseudogene	19.3283	4.44033	8.98213e-06	0.000229493	0	3	1	0	28	29	36	3.67762	4.42245	4.15842	3.67762	5.68058	5.4006	5.43393
ENSMUSG00000074482		Gm16589	predicted gene 16589	processed_pseudogene	7.47461	4.44022	8.98651e-06	0.000229493	17	23	5	3	109	67	270	5.36189	5.61422	4.73396	4.41971	7.09654	6.1436	7.53446
ENSMUSG00000046562	106840	Unc119b	unc-119 lipid binding chaperone B	protein_coding	1.87042	4.43956	9.01425e-06	0.00023001	346	407	258	353	854	870	1372	8.7223	8.96099	8.62665	8.75639	9.82424	9.32444	9.71754
ENSMUSG00000029171	66681	Pgm2	phosphoglucomutase 2	protein_coding	2.57995	4.43923	9.0283e-06	0.000230177	171	160	112	162	686	459	643	7.78875	7.71967	7.53422	7.72594	9.51799	8.45121	8.67193
ENSMUSG00000072978		Gm5830	predicted pseudogene 5830	processed_pseudogene	3.57319	4.43552	9.18499e-06	0.000233977	16	12	5	17	51	74	93	5.31644	5.1227	4.73396	5.36573	6.24906	6.24429	6.30128
ENSMUSG00000030761	17921	Myo7a	myosin VIIA	protein_coding	2.15866	4.43472	9.21935e-06	0.000234657	142	139	114	166	475	439	508	7.55237	7.54133	7.55648	7.75716	9.00945	8.39156	8.355
ENSMUSG00000079227	12774	Ccr5	chemokine (C-C motif) receptor 5	protein_coding	17.3209	4.42421	9.67954e-06	0.000244341	93	24	26	40	2109	265	793	7.03442	5.65044	5.91086	6.1164	11.1043	7.73054	8.95769
ENSMUSG00000117295		Gm5492	predicted gene 5492	processed_pseudogene	3.79077	4.41918	9.90754e-06	0.0002493	18	12	6	8	47	75	82	5.40566	5.1227	4.82993	4.86873	6.16601	6.25809	6.17238
ENSMUSG00000089698		Gm2541	predicted pseudogene 2541	processed_pseudogene	2.73579	4.41916	9.90855e-06	0.0002493	35	74	44	52	169	184	347	5.98126	6.78292	6.43996	6.38584	7.63763	7.27396	7.85422
ENSMUSG00000032006	71785	Pdgfd	platelet-derived growth factor, D polypeptide	protein_coding	3.40646	4.41887	9.92163e-06	0.000249424	17	42	21	25	116	104	222	5.36189	6.17275	5.71705	5.67913	7.17134	6.60768	7.29155
ENSMUSG00000081111		Gm5913	predicted gene 5913	processed_pseudogene	2.61064	4.41654	1.00294e-05	0.000251927	84	58	30	55	184	208	327	6.91471	6.51117	6.04765	6.44566	7.74601	7.42509	7.77778
ENSMUSG00000068245	219132	Phf11d	PHD finger protein 11D	protein_coding	4.19627	4.41604	1.00525e-05	0.000252101	72	23	40	55	349	164	419	6.73743	5.61422	6.33889	6.44566	8.58967	7.13447	8.0999
ENSMUSG00000035413	103743	Tmem98	transmembrane protein 98	protein_coding	1.92318	4.41604	1.00528e-05	0.000252101	152	143	90	112	252	430	504	7.63836	7.57706	7.26326	7.26431	8.15494	8.36389	8.34445
ENSMUSG00000035095	219148	Fam167a	family with sequence similarity 167, member A	protein_coding	2.61066	4.41466	1.01169e-05	0.000252881	254	194	123	252	897	679	882	8.30662	7.96829	7.65257	8.30283	9.89318	8.98259	9.10382
ENSMUSG00000041293	77596	Adgrf1	adhesion G protein-coupled receptor F1	protein_coding	7.69855	4.41431	1.01334e-05	0.000253088	11	2	7	3	72	35	108	5.0575	4.28798	4.91713	4.41971	6.61783	5.55063	6.45953
ENSMUSG00000115505		Gm9247	predicted gene 9247	processed_pseudogene	2.41698	4.40441	1.06074e-05	0.000263637	130	124	117	194	505	402	735	7.44184	7.39877	7.58923	7.9585	9.09365	8.27424	8.85381
ENSMUSG00000021306	83924	Gpr137b	G protein-coupled receptor 137B	protein_coding	2.26804	4.40251	1.07004e-05	0.000265517	108	70	51	88	247	285	324	7.21387	6.71978	6.60081	6.97512	8.12853	7.82394	7.76595
ENSMUSG00000029467	11938	Atp2a2	ATPase, Ca++ transporting, cardiac muscle, slow twitch 2	protein_coding	1.87172	4.3948	1.10874e-05	0.00027401	2704	1794	1583	1788	3963	6382	8000	11.6116	11.0436	11.165	11.0281	12.0065	12.1493	12.2248
ENSMUSG00000085882		2610507I01Rik	RIKEN cDNA 2610507I01 gene	processed_transcript	3.79754	4.39369	1.1144e-05	0.000275031	10	8	14	13	37	85	98	4.9975	4.87298	5.38378	5.17181	5.9328	6.38888	6.35608
ENSMUSG00000026553	12847	Copa	coatomer protein complex subunit alpha	protein_coding	1.56837	4.39348	1.1155e-05	0.000275031	2528	2176	1604	2305	4021	5416	7129	11.5153	11.319	11.1838	11.3905	12.0273	11.914	12.0594
ENSMUSG00000043740	320148	B430306N03Rik	RIKEN cDNA B430306N03 gene	protein_coding	8.00104	4.38979	1.13458e-05	0.000278675	23	6	10	13	265	73	89	5.60361	4.71989	5.14149	5.17181	8.22141	6.23035	6.2558
ENSMUSG00000026648	227525	Dclre1c	DNA cross-link repair 1C	protein_coding	2.62527	4.3882	1.14294e-05	0.000280203	42	40	43	54	187	146	227	6.16009	6.12388	6.41538	6.42601	7.76674	6.99601	7.31887
ENSMUSG00000031309	110651	Rps6ka3	ribosomal protein S6 kinase polypeptide 3	protein_coding	1.62789	4.3875	1.14659e-05	0.000280873	654	629	602	703	1314	1593	2301	9.60002	9.56319	9.79592	9.70807	10.4317	10.1711	10.4459
ENSMUSG00000099875		Rbm3-ps	RNA binding motif (RNP1, RRM) protein 3	processed_pseudogene	2.10133	4.37947	1.18967e-05	0.000290961	589	830	445	473	1221	2266	2668	9.45415	9.95155	9.37431	9.1573	10.3278	10.6701	10.6558
ENSMUSG00000039497	212898	Dse	dermatan sulfate epimerase	protein_coding	2.43666	4.37795	1.198e-05	0.00029246	351	223	294	391	1189	926	1552	8.74179	8.15087	8.80395	8.8958	10.2903	9.41102	9.89036
ENSMUSG00000050578	17386	Mmp13	matrix metallopeptidase 13	protein_coding	32.76	4.37783	1.19866e-05	0.00029246	134	139	27	123	10577	663	1360	7.47964	7.54133	5.94641	7.37944	13.4171	8.9499	9.70525
ENSMUSG00000031617	234463	Tmem184c	transmembrane protein 184C	protein_coding	3.6198	4.37499	1.21436e-05	0.000295583	21	51	22	34	142	116	320	5.5282	6.37324	5.7582	5.95844	7.41909	6.73001	7.75003
ENSMUSG00000099998		Gm6501	predicted gene 6501	processed_pseudogene	5.17925	4.37402	1.21981e-05	0.000296675	23	26	9	4	76	118	213	5.60361	5.71991	5.07183	4.53147	6.67818	6.74939	7.24101
ENSMUSG00000030269	97287	Mtmr14	myotubularin related protein 14	protein_coding	1.78174	4.37304	1.2253e-05	0.000297539	285	313	247	300	691	709	1085	8.46048	8.60358	8.56781	8.53623	9.52811	9.04195	9.39031
ENSMUSG00000018425	67487	Dhx40	DEAH (Asp-Glu-Ala-His) box polypeptide 40	protein_coding	2.23872	4.37184	1.23204e-05	0.000298703	274	312	218	256	949	700	1152	8.40775	8.59926	8.40007	8.3238	9.97238	9.0244	9.47361
ENSMUSG00000032336	20320	Nptn	neuroplastin	protein_coding	1.49864	4.37103	1.23661e-05	0.000299572	1635	1724	1534	1764	3002	4045	5310	10.8935	10.9868	11.1202	11.0088	11.6087	11.4961	11.6374
ENSMUSG00000070934	68441	Rraga	Ras-related GTP binding A	protein_coding	1.63986	4.3703	1.24074e-05	0.000300335	672	815	624	715	1369	1784	2609	9.63794	9.92591	9.84626	9.73176	10.4898	10.3311	10.6241
ENSMUSG00000002996	73389	Hbp1	high mobility group box transcription factor 1	protein_coding	1.68274	4.36899	1.24822e-05	0.000301908	1426	1137	881	1118	2110	3114	4327	10.699	10.3956	10.3322	10.3611	11.105	11.1226	11.3447
ENSMUSG00000016206	14991	H2-M3	histocompatibility 2, M region locus 3	protein_coding	3.43993	4.36855	1.25075e-05	0.000302282	147	165	157	151	1095	436	879	7.59601	7.75905	7.9666	7.63641	10.174	8.3824	9.09912
ENSMUSG00000037260	52120	Hgsnat	heparan-alpha-glucosaminide N-acetyltransferase	protein_coding	2.13203	4.36823	1.2526e-05	0.00030249	500	433	520	528	1662	1497	1874	9.22697	9.04598	9.59111	9.30938	10.7651	10.0835	10.1557
ENSMUSG00000055811	239931	Cldn17	claudin 17	protein_coding	83.7114	4.3664	1.26309e-05	0.000304783	0	0	0	0	30	5	37	3.67762	3.67762	3.67762	3.67762	5.74103	4.42785	5.45551
ENSMUSG00000099858		Gm6652	predicted gene 6652	processed_pseudogene	3.45639	4.36559	1.26781e-05	0.000305682	38	50	27	91	188	218	486	6.06084	6.35236	5.94641	7.01466	7.77358	7.48362	8.29602
ENSMUSG00000039529	54670	Atp8b1	ATPase, class I, type 8B, member 1	protein_coding	2.50953	4.36245	1.28615e-05	0.000309373	163	107	165	183	553	465	888	7.72734	7.21785	8.03147	7.88274	9.2189	8.46864	9.11315
ENSMUSG00000026116	56030	Tmem131	transmembrane protein 131	protein_coding	1.66306	4.36063	1.29688e-05	0.000311708	668	646	475	533	1134	1486	2164	9.6296	9.6004	9.46497	9.32245	10.2234	10.0731	10.359
ENSMUSG00000117875		Gm6789	predicted gene 6789	processed_pseudogene	1.84376	4.35976	1.30206e-05	0.000312709	196	230	152	204	507	541	680	7.96527	8.19167	7.92452	8.02407	9.09909	8.6728	8.74786
ENSMUSG00000021962	75901	Dcp1a	decapping mRNA 1A	protein_coding	1.74323	4.35654	1.32132e-05	0.000317085	176	220	164	186	395	503	710	7.82583	8.13302	8.02352	7.9038	8.75744	8.57433	8.80662
ENSMUSG00000052942	226075	Glis3	GLIS family zinc finger 3	protein_coding	4.60375	4.35389	1.33745e-05	0.000320569	12	13	13	23	143	75	95	5.11432	5.17698	5.32778	5.60788	7.42781	6.25809	6.32346
ENSMUSG00000035004	80719	Igsf6	immunoglobulin superfamily, member 6	protein_coding	7.20958	4.35381	1.33793e-05	0.000320569	58	17	64	41	861	214	299	6.49751	5.37144	6.85777	6.14101	9.83569	7.46049	7.66341
ENSMUSG00000053644	110695	Aldh7a1	aldehyde dehydrogenase family 7, member A1	protein_coding	1.66488	4.3524	1.34657e-05	0.000322388	703	629	443	596	1029	1849	2020	9.70099	9.56319	9.36805	9.47763	10.0863	10.3817	10.2617
ENSMUSG00000029378	11839	Areg	amphiregulin	protein_coding	3.30189	4.35198	1.34913e-05	0.000322749	122	62	27	86	323	414	410	7.3631	6.58423	5.94641	6.94813	8.48542	8.31335	8.0714
ENSMUSG00000037946	30938	Fgd3	FYVE, RhoGEF and PH domain containing 3	protein_coding	3.468	4.35027	1.35969e-05	0.000325021	90	71	88	76	578	361	317	6.99563	6.73583	7.23587	6.80484	9.28006	8.13196	7.73797
ENSMUSG00000054435	107526	Gimap4	GTPase, IMAP family member 4	protein_coding	3.31643	4.34775	1.3754e-05	0.000328009	140	40	63	113	421	413	570	7.53453	6.12388	6.83959	7.27517	8.84427	8.31013	8.50925
ENSMUSG00000022534	54483	Mefv	Mediterranean fever	protein_coding	9.91576	4.3468	1.38137e-05	0.000329176	21	3	17	40	519	160	138	5.5282	4.42245	5.53768	6.1164	9.13132	7.10485	6.73034
ENSMUSG00000024621	12978	Csf1r	colony stimulating factor 1 receptor	protein_coding	2.97553	4.34539	1.39027e-05	0.00033104	1763	850	1387	1456	7379	4546	6854	11.0008	9.98503	10.9766	10.7357	12.8992	11.6632	12.003
ENSMUSG00000033487	319448	Fndc3a	fibronectin type III domain containing 3A	protein_coding	2.7162	4.34451	1.39586e-05	0.000332113	158	160	145	179	745	405	905	7.68758	7.71967	7.86344	7.85417	9.6331	8.28412	9.13929
ENSMUSG00000037731	230787	Themis2	thymocyte selection associated family member 2	protein_coding	5.24082	4.34238	1.40949e-05	0.000334319	230	56	116	111	1522	574	799	8.17505	6.47315	7.5784	7.25336	10.6401	8.75317	8.96802
ENSMUSG00000020638	22169	Cmpk2	cytidine monophosphate (UMP-CMP) kinase 2, mitochondrial	protein_coding	2.54787	4.33933	1.42915e-05	0.000338457	65	43	53	70	218	177	316	6.62262	6.19654	6.64355	6.71128	7.96499	7.22668	7.73393
ENSMUSG00000052684	16476	Jun	jun proto-oncogene	protein_coding	1.60983	4.33914	1.43044e-05	0.0003385	2596	2561	1890	2032	4610	5881	7356	11.5533	11.5519	11.4182	11.2105	12.2234	12.0321	12.1044
ENSMUSG00000101188		Eif4a-ps4	eukaryotic translation initiation factor 4A, pseudogene 4	processed_pseudogene	1.65401	4.33856	1.43419e-05	0.000339001	4575	3508	3180	3422	7681	10267	11657	12.3655	12.0025	12.1633	11.9561	12.9569	12.8322	12.7655
ENSMUSG00000083627		Gm12502	predicted gene 12502	processed_pseudogene	3.67865	4.33847	1.43477e-05	0.000339001	9	11	8	18	38	77	99	4.93383	5.06559	4.99734	5.40958	5.95804	6.28526	6.36678
ENSMUSG00000033777	279572	Tlr13	toll-like receptor 13	protein_coding	5.70487	4.33607	1.45054e-05	0.000342461	103	27	54	102	950	310	466	7.15654	5.75328	6.66443	7.15088	9.97386	7.93273	8.24023
ENSMUSG00000085917		Gm15899	predicted gene 15899	processed_pseudogene	36.0655	4.3359	1.45164e-05	0.000342461	1	1	0	0	17	24	52	4.10811	4.11081	3.67762	3.67762	5.28265	5.25944	5.74085
ENSMUSG00000033721	57257	Vav3	vav 3 oncogene	protein_coding	1.94877	4.33533	1.45545e-05	0.000343094	428	337	294	268	653	1256	1335	9.01275	8.7036	8.80395	8.38491	9.44937	9.83668	9.67929
ENSMUSG00000096173		Gm3150	predicted gene 3150	processed_pseudogene	2.25759	4.3348	1.45891e-05	0.000343645	56	81	37	73	173	217	287	6.45959	6.88703	6.25788	6.75884	7.66735	7.47787	7.61145
ENSMUSG00000052353	80982	Cemip	cell migration inducing protein, hyaluronan binding	protein_coding	7.10878	4.33057	1.48726e-05	0.000349787	124	19	24	31	723	465	300	7.3832	5.45783	5.83676	5.87182	9.59124	8.46864	7.66765
ENSMUSG00000058594	50755	Fbh1	F-box DNA helicase 1	protein_coding	1.7956	4.33001	1.491e-05	0.000350058	501	549	421	533	1150	1195	2089	9.22973	9.3739	9.29743	9.32245	10.2432	9.76688	10.3091
ENSMUSG00000027997	12368	Casp6	caspase 6	protein_coding	1.899	4.32989	1.49184e-05	0.000350058	252	252	189	205	623	651	758	8.2961	8.31284	8.21016	8.03047	9.38401	8.92489	8.89591
ENSMUSG00000050896	269295	Rtn4rl2	reticulon 4 receptor-like 2	protein_coding	7.01183	4.32359	1.53512e-05	0.000357203	52	16	10	28	444	127	189	6.38048	5.32579	5.14149	5.77906	8.91696	6.83347	7.09672
ENSMUSG00000117252		Gm9514	predicted gene 9514	processed_pseudogene	9.36742	4.32157	1.54924e-05	0.000359885	3	6	2	2	48	18	81	4.41788	4.71989	4.3545	4.28573	6.18725	5.06329	6.16003
ENSMUSG00000114579		Gm4130	predicted gene 4130	processed_pseudogene	3.45792	4.32144	1.55017e-05	0.000359885	8	17	13	13	59	61	97	4.86588	5.37144	5.32778	5.17181	6.40138	6.05088	6.34529
ENSMUSG00000022663	67841	Atg3	autophagy related 3	protein_coding	1.76755	4.32092	1.55383e-05	0.000360463	801	840	765	762	1817	1947	3158	9.8839	9.96839	10.1329	9.82096	10.892	10.4549	10.8955
ENSMUSG00000038517	73174	Tbkbp1	TBK1 binding protein 1	protein_coding	2.88499	4.32007	1.55977e-05	0.000361568	244	159	163	254	1089	611	995	8.25325	7.71167	8.01553	8.31335	10.1662	8.83824	9.27026
ENSMUSG00000038780	75788	Smurf1	SMAD specific E3 ubiquitin protein ligase 1	protein_coding	2.14193	4.31914	1.56636e-05	0.00036282	693	376	368	393	1088	1741	2019	9.68095	8.85263	9.11156	8.90278	10.1649	10.2966	10.261
ENSMUSG00000032014	102644	Oaf	out at first homolog	protein_coding	1.9813	4.31816	1.57338e-05	0.000363897	446	397	327	533	1159	1077	1850	9.06936	8.92692	8.94929	9.32245	10.2542	9.62146	10.1376
ENSMUSG00000044811	140497	Cd300c2	CD300C molecule 2	protein_coding	6.29361	4.31741	1.57874e-05	0.00036486	183	42	63	130	1603	522	564	7.87619	6.17275	6.83959	7.44814	10.7138	8.62441	8.49503
ENSMUSG00000034438	76074	Gbp8	guanylate-binding protein 8	protein_coding	14.8092	4.3167	1.58376e-05	0.000365745	8	8	8	10	401	22	54	4.86588	4.87298	4.99734	5.00063	8.77795	5.19779	5.77447
ENSMUSG00000111877		Gm6477	predicted gene 6477	processed_pseudogene	2.43145	4.3156	1.59172e-05	0.000367305	52	74	29	59	172	212	237	6.38048	6.78292	6.01475	6.5216	7.65998	7.44879	7.37199
ENSMUSG00000024190	19252	Dusp1	dual specificity phosphatase 1	protein_coding	2.18802	4.3154	1.59314e-05	0.000367358	740	1048	832	824	3038	2706	3130	9.7728	10.2803	10.2514	9.93078	11.6257	10.9224	10.8829
ENSMUSG00000030659	53322	Nucb2	nucleobindin 2	protein_coding	2.12786	4.31509	1.59537e-05	0.000367478	1203	618	778	1132	2356	3538	3832	10.4577	9.53859	10.1566	10.3787	11.2623	11.3047	11.1712
ENSMUSG00000074903		Gm2058	predicted gene 2058	processed_pseudogene	4.77649	4.31289	1.61136e-05	0.000370165	9	19	5	9	62	50	136	4.93383	5.45783	4.73396	4.93682	6.45442	5.86212	6.71384
ENSMUSG00000037896	217864	Rcor1	REST corepressor 1	protein_coding	1.73216	4.31181	1.61921e-05	0.000371691	411	420	305	361	687	1009	1566	8.95715	9.00411	8.85405	8.78688	9.52002	9.53047	9.90298
ENSMUSG00000070524	435653	Fcrlb	Fc receptor-like B	protein_coding	20.1677	4.31123	1.62347e-05	0.000371848	0	5	0	5	125	46	30	3.67762	4.63238	3.67762	4.62892	7.26207	5.78616	5.29562
ENSMUSG00000041872	257630	Il17f	interleukin 17F	protein_coding	20.3825	4.31081	1.62656e-05	0.000371985	2	0	0	7	80	18	113	4.28421	3.67762	3.67762	4.79554	6.73603	5.06329	6.50848
ENSMUSG00000033965	20502	Slc16a2	solute carrier family 16 (monocarboxylic acid transporters), member 2	protein_coding	1.73806	4.31032	1.6302e-05	0.000372539	306	295	209	250	623	732	863	8.55609	8.52372	8.34377	8.29224	9.38401	9.08585	9.07384
ENSMUSG00000071715	17972	Ncf4	neutrophil cytosolic factor 4	protein_coding	5.83606	4.30991	1.63318e-05	0.000372943	115	63	75	140	1489	362	480	7.29044	6.60191	7.04366	7.54089	10.609	8.13561	8.27951
ENSMUSG00000038587	83397	Akap12	A kinase (PRKA) anchor protein (gravin) 12	protein_coding	2.10742	4.30937	1.63719e-05	0.000373302	142	115	91	159	376	354	553	7.55237	7.30586	7.27676	7.70207	8.69049	8.1062	8.46858
ENSMUSG00000000530	11482	Acvrl1	activin A receptor, type II-like 1	protein_coding	2.46296	4.30868	1.64232e-05	0.000373636	617	443	480	756	2367	1683	2539	9.5188	9.07738	9.47955	9.80988	11.269	10.2487	10.5855
ENSMUSG00000034663	140780	Bmp2k	BMP2 inducible kinase	protein_coding	1.88138	4.30514	1.66883e-05	0.000378545	517	342	330	359	960	1230	1329	9.27322	8.72359	8.9618	8.77932	9.98859	9.80734	9.673
ENSMUSG00000027360	15186	Hdc	histidine decarboxylase	protein_coding	13.3427	4.30257	1.6883e-05	0.000382394	205	121	109	293	6467	2214	793	8.02385	7.36847	7.50016	8.50446	12.7095	10.6371	8.95769
ENSMUSG00000024066	22436	Xdh	xanthine dehydrogenase	protein_coding	2.46695	4.30221	1.69101e-05	0.000382724	1955	972	1034	1404	5262	4326	5872	11.1482	10.174	10.5591	10.6841	12.4133	11.5922	11.7814
ENSMUSG00000053835	15042	H2-T24	histocompatibility 2, T region locus 24	protein_coding	6.12394	4.3005	1.70413e-05	0.000385324	54	14	30	31	470	121	255	6.4206	5.22876	6.04765	5.87182	8.99493	6.77798	7.46289
ENSMUSG00000020101	74048	Vsir	V-set immunoregulatory receptor	protein_coding	2.80134	4.30022	1.70627e-05	0.000385324	1026	666	670	725	4016	2176	3689	10.2326	9.64298	9.94616	9.7512	12.0255	10.6125	11.117
ENSMUSG00000039530	80286	Tusc3	tumor suppressor candidate 3	protein_coding	2.07153	4.29909	1.715e-05	0.000386727	130	224	152	185	412	543	834	7.44184	8.15677	7.92452	7.89681	8.8148	8.6778	9.02685
ENSMUSG00000060459	385643	Kng2	kininogen 2	protein_coding	4.29006	4.29758	1.72676e-05	0.000389092	19	18	6	15	113	65	103	5.44789	5.41541	4.82993	5.27283	7.13977	6.1134	6.40877
ENSMUSG00000071713	12983	Csf2rb	colony stimulating factor 2 receptor, beta, low-affinity (granulocyte-macrophage)	protein_coding	5.57248	4.29489	1.74776e-05	0.000393535	397	290	401	543	5963	1160	2290	8.90971	8.50073	9.23007	9.34822	12.5929	9.72526	10.4391
ENSMUSG00000044337	12778	Ackr3	atypical chemokine receptor 3	protein_coding	2.15377	4.29463	1.74985e-05	0.000393717	450	511	492	525	1625	1256	2263	9.08164	9.27447	9.51393	9.30149	10.7331	9.83668	10.4223
ENSMUSG00000070436	12406	Serpinh1	serine (or cysteine) peptidase inhibitor, clade H, member 1	protein_coding	2.10805	4.29419	1.7533e-05	0.000394203	4679	2844	3075	4776	11465	11039	16403	12.3977	11.7019	12.1152	12.4345	13.5332	12.9364	13.2567
ENSMUSG00000074874	13025	Ctla2b	cytotoxic T lymphocyte-associated protein 2 beta	protein_coding	9.69266	4.29393	1.75538e-05	0.000394381	1	2	4	4	55	24	43	4.10811	4.28798	4.62649	4.53147	6.32734	5.25944	5.57755
ENSMUSG00000025701	11689	Alox5	arachidonate 5-lipoxygenase	protein_coding	2.06515	4.29285	1.76391e-05	0.000396007	110	107	108	125	351	328	434	7.23617	7.21785	7.48862	7.39941	8.59739	8.00625	8.1462
ENSMUSG00000027200	214968	Sema6d	sema domain, transmembrane domain (TM), and cytoplasmic domain, (semaphorin) 6D	protein_coding	2.60369	4.29264	1.76564e-05	0.000396106	80	56	50	92	294	228	322	6.85806	6.47315	6.57894	7.0276	8.35946	7.53985	7.75801
ENSMUSG00000053436	26416	Mapk14	mitogen-activated protein kinase 14	protein_coding	1.62986	4.29027	1.78457e-05	0.000400059	1487	1130	1075	1267	2379	3156	4494	10.7585	10.3869	10.6142	10.5383	11.2762	11.1417	11.3988
ENSMUSG00000037119	210998	Fam91a1	family with sequence similarity 91, member A1	protein_coding	1.58906	4.28689	1.81192e-05	0.000405584	687	623	587	595	1234	1564	2089	9.66879	9.54982	9.76057	9.47529	10.3428	10.1452	10.3091
ENSMUSG00000038991	105245	Txndc5	thioredoxin domain containing 5	protein_coding	1.76727	4.28452	1.83135e-05	0.000409051	2124	1669	1221	1846	4106	4601	5810	11.2665	10.9407	10.7952	11.0736	12.0573	11.6804	11.7662
ENSMUSG00000043943	72560	Naalad2	N-acetylated alpha-linked acidic dipeptidase 2	protein_coding	2.64256	4.28158	1.85575e-05	0.000413897	29	37	34	43	137	113	210	5.80613	6.04707	6.17175	6.18892	7.37468	6.70041	7.22376
ENSMUSG00000083798		Gm14584	predicted gene 14584	processed_pseudogene	13.8121	4.28128	1.85824e-05	0.000414151	4	1	0	1	27	21	53	4.52938	4.11081	3.67762	4.10919	5.64925	5.16567	5.75777
ENSMUSG00000047793	208777	Sned1	sushi, nidogen and EGF-like domains 1	protein_coding	3.14424	4.28077	1.86246e-05	0.00041479	260	171	232	275	1367	619	1441	8.33771	7.80492	8.48349	8.4194	10.4878	8.85599	9.78626
ENSMUSG00000050912	71929	Tmem123	transmembrane protein 123	protein_coding	1.71813	4.27908	1.87669e-05	0.000417626	1657	1427	1053	1116	2686	3747	4656	10.9125	10.7178	10.5849	10.3586	11.4496	11.3867	11.4494
ENSMUSG00000024260	269003	Sap130	Sin3A associated protein	protein_coding	1.90967	4.27748	1.89018e-05	0.00041944	213	218	142	247	371	683	918	8.07399	8.121	7.83645	8.27619	8.67235	8.99065	9.15896
ENSMUSG00000039005	21898	Tlr4	toll-like receptor 4	protein_coding	4.13789	4.27721	1.89249e-05	0.000419647	40	72	69	80	588	226	386	6.11138	6.7517	6.94531	6.86391	9.30382	7.52878	7.99249
ENSMUSG00000023885	21826	Thbs2	thrombospondin 2	protein_coding	2.35888	4.27567	1.90562e-05	0.00042195	1584	736	907	1419	2576	5046	6214	10.8484	9.78283	10.3734	10.6992	11.3898	11.8126	11.8625
ENSMUSG00000078783	751864	Gm9733	predicted gene 9733	protein_coding	10.971	4.27504	1.911e-05	0.000422529	26	6	12	2	328	109	81	5.70888	4.71989	5.26898	4.28573	8.50606	6.65995	6.16003
ENSMUSG00000038546	56705	Ranbp9	RAN binding protein 9	protein_coding	1.77501	4.27416	1.91858e-05	0.0004239	621	783	479	573	1296	1627	2465	9.52781	9.86965	9.47664	9.42289	10.4122	10.2009	10.5435
ENSMUSG00000022123	64929	Scel	sciellin	protein_coding	3.75211	4.27324	1.92656e-05	0.00042505	164	304	123	117	387	1000	2172	7.73516	8.5642	7.65257	7.3178	8.72963	9.51798	10.3642
ENSMUSG00000028874	14191	Fgr	FGR proto-oncogene, Src family tyrosine kinase	protein_coding	6.5387	4.27302	1.92845e-05	0.00042516	151	51	61	56	1362	354	391	7.62999	6.37324	6.80251	6.46504	10.4826	8.1062	8.00929
ENSMUSG00000001930	22371	Vwf	Von Willebrand factor	protein_coding	2.65531	4.27151	1.94154e-05	0.000427739	2201	801	1003	1383	4661	5019	7675	11.3173	9.90157	10.5159	10.6627	12.2392	11.8049	12.1653
ENSMUSG00000030144	17474	Clec4d	C-type lectin domain family 4, member d	protein_coding	19.0672	4.27062	1.94934e-05	0.000429149	105	98	45	133	5249	1129	433	7.17975	7.11185	6.46412	7.47661	12.4097	9.68736	8.14316
ENSMUSG00000070427	16068	Il18bp	interleukin 18 binding protein	protein_coding	7.09806	4.26814	1.97107e-05	0.000433311	101	45	75	69	1456	244	366	7.13294	6.24291	7.04366	6.69507	10.5772	7.62544	7.92324
ENSMUSG00000014599	12977	Csf1	colony stimulating factor 1 (macrophage)	protein_coding	1.9689	4.26783	1.9738e-05	0.0004336	684	481	605	713	1655	1705	2632	9.66267	9.19082	9.80289	9.72783	10.7591	10.2671	10.6365
ENSMUSG00000005824	50930	Tnfsf14	tumor necrosis factor (ligand) superfamily, member 14	protein_coding	7.92428	4.2676	1.97589e-05	0.000433748	36	7	6	22	333	115	125	6.00832	4.79955	4.82993	5.57068	8.52641	6.72021	6.61939
ENSMUSG00000041343	73845	Ankrd42	ankyrin repeat domain 42	protein_coding	2.80088	4.26672	1.98369e-05	0.000435148	17	22	12	23	64	76	114	5.36189	5.57693	5.26898	5.60788	6.48868	6.27174	6.51807
ENSMUSG00000026581	20343	Sell	selectin, lymphocyte	protein_coding	53.2939	4.26654	1.9853e-05	0.000435168	16	5	2	22	1876	91	171	5.31644	4.63238	4.3545	5.57068	10.9375	6.46178	6.97798
ENSMUSG00000075012	14221	Fjx1	four jointed box 1	protein_coding	2.90613	4.26431	2.00521e-05	0.000437987	101	120	106	116	624	355	481	7.13294	7.35822	7.46527	7.30726	9.38624	8.10991	8.28228
ENSMUSG00000048572	226040	Tmem252	transmembrane protein 252	protein_coding	5.07272	4.26369	2.01082e-05	0.000438311	277	84	156	165	2063	675	927	8.42233	6.92939	7.95828	7.74942	11.0728	8.97449	9.17242
ENSMUSG00000042228	17096	Lyn	LYN proto-oncogene, Src family tyrosine kinase	protein_coding	4.54382	4.25901	2.05334e-05	0.000446297	247	164	251	263	2573	774	1134	8.26947	7.75126	8.58949	8.35976	11.3882	9.16274	9.4517
ENSMUSG00000090527	433597	Aadacl2fm2	AADACL2 family member 2	protein_coding	3.06489	4.259	2.05345e-05	0.000446297	64	61	73	139	199	444	706	6.60542	6.56632	7.01163	7.53188	7.84677	8.40671	8.79892
ENSMUSG00000039236	57444	Isg20	interferon-stimulated protein	protein_coding	5.28372	4.25741	2.06804e-05	0.000449151	45	57	36	75	695	170	302	6.23002	6.49229	6.22977	6.78967	9.53616	7.17777	7.67611
ENSMUSG00000024349	72512	Sting1	stimulator of interferon response cGAMP interactor 1	protein_coding	4.02367	4.25602	2.08098e-05	0.00045132	274	154	182	246	1964	690	1043	8.40775	7.67095	8.1603	8.2708	11.0028	9.00464	9.33553
ENSMUSG00000078502	433801	Gm13212	predicted gene 13212	protein_coding	4.97825	4.25456	2.09457e-05	0.000453626	4	11	8	14	85	61	64	4.52938	5.06559	4.99734	5.22344	6.80514	6.05088	5.93064
ENSMUSG00000036167	223828	Pphln1	periphilin 1	protein_coding	1.77621	4.25394	2.10038e-05	0.000454534	138	142	130	135	316	363	510	7.51647	7.56821	7.72309	7.49527	8.45601	8.13924	8.36024
ENSMUSG00000073602	383548	Serpinb3b	serine (or cysteine) peptidase inhibitor, clade B (ovalbumin), member 3B	protein_coding	6.33104	4.2538	2.10173e-05	0.000454534	379	28	134	120	1645	1151	2149	8.84631	5.78581	7.76188	7.34895	10.7505	9.71436	10.3492
ENSMUSG00000044322	13505	Dsc1	desmocollin 1	protein_coding	4.55753	4.25361	2.10354e-05	0.000454605	1064	334	394	207	1510	3963	6530	10.284	8.69147	9.20574	8.04317	10.6289	11.4668	11.9336
ENSMUSG00000027189	80985	Trim44	tripartite motif-containing 44	protein_coding	1.51942	4.25332	2.1062e-05	0.000454858	441	474	352	432	716	1104	1389	9.05386	9.17058	9.05039	9.03247	9.57767	9.65605	9.73478
ENSMUSG00000029304	20750	Spp1	secreted phosphoprotein 1	protein_coding	6.91063	4.25151	2.12333e-05	0.000457912	87	119	98	394	2613	1838	545	6.95575	7.3479	7.36784	8.90625	11.4102	10.3733	8.44903
ENSMUSG00000053219	379043	Raet1e	retinoic acid early transcript 1E	protein_coding	6.64026	4.2505	2.1329e-05	0.00045935	5	4	2	2	33	32	37	4.6266	4.5346	4.3545	4.28573	5.82669	5.47792	5.45551
ENSMUSG00000000982	20302	Ccl3	chemokine (C-C motif) ligand 3	protein_coding	20.4145	4.25049	2.13299e-05	0.00045935	17	20	57	44	1692	1214	126	5.36189	5.49882	6.72528	6.21226	10.7906	9.78899	6.62824
ENSMUSG00000027363	84092	Usp8	ubiquitin specific peptidase 8	protein_coding	1.79758	4.24944	2.14302e-05	0.000461187	435	388	254	310	705	984	1397	9.03503	8.89555	8.60553	8.58043	9.55607	9.49552	9.74282
ENSMUSG00000024678	66607	Ms4a4d	membrane-spanning 4-domains, subfamily A, member 4D	protein_coding	3.45271	4.24725	2.16412e-05	0.000465073	162	162	160	241	1206	439	1226	7.71947	7.73555	7.99127	8.24356	10.3104	8.39156	9.56035
ENSMUSG00000059040	433182	Eno1b	enolase 1B, retrotransposed	protein_coding	4.57359	4.24593	2.17691e-05	0.000467167	148	44	53	23	345	584	573	7.60458	6.21992	6.64355	5.60788	8.57412	8.77666	8.51631
ENSMUSG00000051855	17294	Mest	mesoderm specific transcript	protein_coding	2.94953	4.24189	2.21649e-05	0.000474001	56	43	49	59	159	399	188	6.45959	6.19654	6.55672	6.5216	7.56054	8.26429	7.09038
ENSMUSG00000016496	60533	Cd274	CD274 antigen	protein_coding	6.22733	4.24111	2.22415e-05	0.000475306	160	90	122	214	2469	467	740	7.70362	7.01049	7.64221	8.08677	11.3292	8.4744	8.86307
ENSMUSG00000003062	76205	Stard3nl	STARD3 N-terminal like	protein_coding	2.24721	4.23795	2.25572e-05	0.000480713	251	233	189	213	834	606	884	8.29082	8.2088	8.21016	8.08063	9.79101	8.82703	9.10694
ENSMUSG00000100153	434233	Ppp1ccb	protein phosphatase 1 catalytic subunit gamma B	transcribed_processed_pseudogene	1.74676	4.23769	2.25829e-05	0.000480927	432	461	386	437	1050	1049	1534	9.02552	9.13223	9.17741	9.04829	10.1148	9.58468	9.87398
ENSMUSG00000074516		Gm10709	predicted gene 10709	processed_pseudogene	1.92527	4.23519	2.28354e-05	0.000484956	168	137	103	119	254	500	510	7.76603	7.52312	7.42951	7.33864	8.16537	8.56627	8.36024
ENSMUSG00000024121	11984	Atp6v0c	ATPase, H+ transporting, lysosomal V0 subunit C	protein_coding	2.04983	4.2345	2.2906e-05	0.000485386	694	410	428	455	1423	1687	1760	9.68296	8.97106	9.32028	9.10382	10.5447	10.2521	10.0673
ENSMUSG00000021877	11843	Arf4	ADP-ribosylation factor 4	protein_coding	1.82821	4.23182	2.3181e-05	0.000489244	1597	1497	1413	1696	4222	3874	5486	10.86	10.7859	11.0031	10.9528	12.0973	11.4344	11.6841
ENSMUSG00000083902		Gm15975	predicted gene 15975	processed_pseudogene	3.4621	4.23119	2.32457e-05	0.000489934	36	49	46	18	206	154	265	6.00832	6.33116	6.48786	5.40958	7.89147	7.05923	7.511
ENSMUSG00000018593	20692	Sparc	secreted acidic cysteine rich glycoprotein	protein_coding	1.84696	4.22994	2.33755e-05	0.000491992	35398	23309	21607	32992	58712	79518	122005	15.3112	14.727	14.9209	15.217	15.8871	15.781	16.1484
ENSMUSG00000021959	50523	Lats2	large tumor suppressor 2	protein_coding	1.71206	4.22834	2.35426e-05	0.00049483	239	223	202	223	518	639	676	8.22581	8.15087	8.29841	8.14096	9.12866	8.89944	8.73984
ENSMUSG00000029345	54723	Tfip11	tuftelin interacting protein 11	protein_coding	1.71301	4.22734	2.36475e-05	0.000496695	589	452	343	446	963	1232	1635	9.45415	9.10507	9.01481	9.07632	9.99298	9.80962	9.96358
ENSMUSG00000062127	80281	Cttnbp2nl	CTTNBP2 N-terminal like	protein_coding	2.27187	4.22716	2.36661e-05	0.000496744	335	228	146	212	773	761	920	8.67847	8.18013	7.87233	8.07445	9.68467	9.13937	9.16196
ENSMUSG00000100204		Gm4849	predicted gene 4849	processed_pseudogene	5.30061	4.22663	2.37217e-05	0.000497231	2	6	7	5	35	37	60	4.28421	4.71989	4.91713	4.62892	5.88082	5.59685	5.87039
ENSMUSG00000025491	68713	Ifitm1	interferon induced transmembrane protein 1	protein_coding	15.8066	4.22522	2.38702e-05	0.000500002	207	87	130	203	7242	1015	1366	8.03655	6.97052	7.72309	8.01765	12.8722	9.53873	9.71141
ENSMUSG00000078921	100039796	Tgtp2	T cell specific GTPase 2	protein_coding	30.7875	4.22258	2.41521e-05	0.000505215	6	11	6	2	584	31	137	4.71362	5.06559	4.82993	4.28573	9.29436	5.45269	6.72211
ENSMUSG00000027423	69178	Snx5	sorting nexin 5	protein_coding	1.92224	4.22175	2.42416e-05	0.000506397	2182	1622	1613	1931	5364	4870	6548	11.305	10.9	11.1918	11.1378	12.4409	11.7618	11.9376
ENSMUSG00000031659	11513	Adcy7	adenylate cyclase 7	protein_coding	2.15911	4.21755	2.46969e-05	0.000514155	197	144	104	170	456	410	736	7.97189	7.58585	7.44153	7.78771	8.95347	8.30043	8.85567
ENSMUSG00000028646	54170	Rragc	Ras-related GTP binding C	protein_coding	1.57955	4.21652	2.481e-05	0.000515808	1204	914	880	1093	1792	2818	3428	10.4589	10.0872	10.3306	10.3291	10.8722	10.9802	11.0124
ENSMUSG00000024104	28006	Washc2	WASH complex subunit 2`	protein_coding	1.58689	4.21504	2.49735e-05	0.000518856	803	648	566	673	1261	1671	2352	9.88741	9.60471	9.70956	9.64708	10.3734	10.2386	10.477
ENSMUSG00000058325	330662	Dock1	dedicator of cytokinesis 1	protein_coding	1.60057	4.21486	2.49929e-05	0.000518908	418	409	337	340	675	1094	1219	8.98031	8.96771	8.99059	8.70542	9.49548	9.64333	9.55236
ENSMUSG00000026737	18718	Pip4k2a	phosphatidylinositol-5-phosphate 4-kinase, type II, alpha	protein_coding	2.02195	4.21458	2.50242e-05	0.000519205	362	307	272	302	974	802	1211	8.78376	8.57745	8.69822	8.54518	10.009	9.2118	9.54318
ENSMUSG00000050232	12766	Cxcr3	chemokine (C-X-C motif) receptor 3	protein_coding	3.3051	4.2141	2.50779e-05	0.000519967	26	12	23	17	101	87	122	5.70888	5.1227	5.79807	5.36573	7.00593	6.41361	6.59248
ENSMUSG00000030830	16408	Itgal	integrin alpha L	protein_coding	6.38793	4.21275	2.52283e-05	0.000521681	65	39	23	61	788	189	212	6.62262	6.09876	5.79807	6.55806	9.71155	7.30679	7.23528
ENSMUSG00000041143	77056	Tmco4	transmembrane and coiled-coil domains 4	protein_coding	1.82885	4.21237	2.52708e-05	0.000522202	403	291	325	302	789	931	1247	8.93023	8.50536	8.94089	8.54518	9.71333	9.4185	9.58404
ENSMUSG00000006611	15216	Hfe	homeostatic iron regulator	protein_coding	2.28596	4.21176	2.53387e-05	0.000523251	382	278	293	501	1187	994	1832	8.85707	8.444	8.79931	9.23673	10.2879	9.5096	10.1238
ENSMUSG00000029103	16976	Lrpap1	low density lipoprotein receptor-related protein associated protein 1	protein_coding	1.84347	4.21157	2.53604e-05	0.000523347	855	703	674	835	1963	1832	3082	9.97559	9.71859	9.95453	9.94942	11.002	10.3687	10.8609
ENSMUSG00000041734	170643	Kirrel	kirre like nephrin family adhesion molecule 1	protein_coding	2.09815	4.21077	2.54501e-05	0.000524706	212	214	166	289	608	567	1086	8.06781	8.09665	8.03938	8.48599	9.35019	8.73649	9.39159
ENSMUSG00000041696	70784	Rasl12	RAS-like, family 12	protein_coding	2.80381	4.21068	2.54605e-05	0.000524706	67	54	40	79	280	175	329	6.6564	6.43405	6.33889	6.84938	8.29447	7.21288	7.78561
ENSMUSG00000038646	67148	Ramac	RNA guanine-7 methyltransferase activating subunit	protein_coding	1.67706	4.20974	2.55663e-05	0.000526178	189	218	163	206	389	495	727	7.91799	8.121	8.01553	8.03683	8.73663	8.55272	8.83888
ENSMUSG00000002699	16822	Lcp2	lymphocyte cytosolic protein 2	protein_coding	6.818	4.20936	2.56092e-05	0.000526707	131	31	107	82	1602	441	431	7.45139	5.87878	7.477	6.89255	10.7129	8.39764	8.13706
ENSMUSG00000025076	12369	Casp7	caspase 7	protein_coding	3.15105	4.20902	2.56476e-05	0.000527144	88	103	80	45	442	274	447	6.96917	7.17171	7.12069	6.2352	8.91078	7.77333	8.18514
ENSMUSG00000025423	17344	Pias2	protein inhibitor of activated STAT 2	protein_coding	1.77355	4.20885	2.56679e-05	0.000527207	196	254	156	236	390	649	823	7.96527	8.32336	7.95828	8.21579	8.74012	8.92068	9.00862
ENSMUSG00000025735	214951	Rhbdl1	rhomboid like 1	protein_coding	8.82234	4.20834	2.5725e-05	0.000528026	1	2	7	3	23	38	96	4.10811	4.28798	4.91713	4.41971	5.51549	5.61933	6.33442
ENSMUSG00000021260	214305	Hhipl1	hedgehog interacting protein-like 1	protein_coding	2.54003	4.2078	2.57875e-05	0.000528954	128	87	102	109	422	280	601	7.42256	6.97052	7.41739	7.23122	8.84751	7.80115	8.58059
ENSMUSG00000001751	27419	Naglu	alpha-N-acetylglucosaminidase (Sanfilippo disease IIIB)	protein_coding	2.29037	4.20731	2.58428e-05	0.000529734	421	224	187	266	883	891	1220	8.99011	8.15677	8.19609	8.3749	9.87109	9.35752	9.55351
ENSMUSG00000055172	50909	C1ra	complement component 1, r subcomponent A	protein_coding	3.01618	4.20671	2.59117e-05	0.000530792	1933	717	1031	1104	5720	3686	7765	11.132	9.74619	10.5549	10.3433	12.5332	11.3633	12.182
ENSMUSG00000021256	238328	Vash1	vasohibin 1	protein_coding	7.53435	4.20626	2.59636e-05	0.000531144	3	5	2	4	28	22	85	4.41788	4.63238	4.3545	4.53147	5.68058	5.19779	6.20876
ENSMUSG00000036932	26926	Aifm1	apoptosis-inducing factor, mitochondrion-associated 1	protein_coding	2.20238	4.20603	2.59895e-05	0.000531319	269	403	257	314	950	787	1604	8.38313	8.94746	8.6214	8.59773	9.97386	9.18572	9.93666
ENSMUSG00000033467	57914	Crlf2	cytokine receptor-like factor 2	protein_coding	2.53256	4.20538	2.60646e-05	0.000532145	497	270	218	300	1309	1182	1255	9.21865	8.4049	8.40007	8.53623	10.4263	9.75156	9.59296
ENSMUSG00000006490	67310	Prl8a9	prolactin family8, subfamily a, member 9	protein_coding	74.3112	4.20418	2.62029e-05	0.000534612	0	0	0	0	35	11	11	3.67762	3.67762	3.67762	3.67762	5.88082	4.77623	4.68871
ENSMUSG00000021831	50527	Ero1l	ERO1-like (S. cerevisiae)	protein_coding	2.91826	4.2007	2.66091e-05	0.000542178	445	339	349	287	2033	1110	1544	9.06627	8.71163	9.03863	8.47666	11.052	9.66363	9.88311
ENSMUSG00000056708	15939	Ier5	immediate early response 5	protein_coding	1.95221	4.19897	2.68126e-05	0.000545276	1407	1005	1040	982	3134	3604	3587	10.6799	10.2211	10.5673	10.1778	11.6703	11.3311	11.077
ENSMUSG00000056457	18812,26421	Prl2c3	prolactin family 2, subfamily c, member 3	protein_coding	78.3538	4.19882	2.68309e-05	0.000545276	0	0	0	0	30	27	5	3.67762	3.67762	3.67762	3.67762	5.74103	5.34614	4.36676
ENSMUSG00000032504	18571	Pdcd6ip	programmed cell death 6 interacting protein	protein_coding	1.5602	4.19647	2.71103e-05	0.000549468	2179	1848	1817	1786	3580	5069	6079	11.303	11.0858	11.3619	11.0265	11.8608	11.8191	11.8311
ENSMUSG00000027513	18534	Pck1	phosphoenolpyruvate carboxykinase 1, cytosolic	protein_coding	5.6532	4.19405	2.74014e-05	0.000553903	100	146	48	379	1502	635	2278	7.121	7.60328	6.53415	8.85322	10.6213	8.89086	10.4317
ENSMUSG00000004508	14389	Gab2	growth factor receptor bound protein 2-associated protein 2	protein_coding	2.09728	4.19368	2.74471e-05	0.00055446	211	165	144	217	606	534	674	8.06161	7.75905	7.8545	8.10506	9.34561	8.65516	8.73582
ENSMUSG00000027737	26570	Slc7a11	solute carrier family 7 (cationic amino acid transporter, y+ system), member 11	protein_coding	5.20467	4.19297	2.75325e-05	0.000555818	359	44	109	91	1114	1373	1190	8.77243	6.21992	7.50016	7.01466	10.1983	9.96178	9.5188
ENSMUSG00000008734	64297	Gprc5b	G protein-coupled receptor, family C, group 5, member B	protein_coding	1.81351	4.19063	2.78175e-05	0.000560097	470	382	356	559	971	1162	1824	9.14154	8.87425	9.06593	9.38853	10.0046	9.72767	10.1176
ENSMUSG00000078780	381484	Gm5150	predicted gene 5150	protein_coding	17.5497	4.19	2.78957e-05	0.000561303	17	3	3	1	300	24	85	5.36189	4.42245	4.50295	4.10919	8.38644	5.25944	6.20876
ENSMUSG00000026177	18173	Slc11a1	solute carrier family 11 (proton-coupled divalent metal ion transporters), member 1	protein_coding	4.97882	4.18969	2.79342e-05	0.000561708	213	68	132	175	1757	560	775	8.07399	6.6871	7.74262	7.82501	10.8442	8.71962	8.92625
ENSMUSG00000031792	101985	Usb1	U6 snRNA biogenesis 1	protein_coding	2.01843	4.18885	2.80369e-05	0.000563034	247	203	168	241	675	628	730	8.26947	8.02747	8.05506	8.24356	9.49548	8.87571	8.84449
ENSMUSG00000032243	319480	Itga11	integrin alpha 11	protein_coding	2.85406	4.18731	2.8228e-05	0.000566236	88	66	92	102	255	266	775	6.96917	6.65365	7.29013	7.15088	8.17055	7.73536	8.92625
ENSMUSG00000026343	71111	Gpr39	G protein-coupled receptor 39	protein_coding	6.35931	4.18698	2.8269e-05	0.000566583	6	7	7	4	63	23	100	4.71362	4.79955	4.91713	4.53147	6.47165	5.22903	6.3774
ENSMUSG00000037029	26465	Zfp146	zinc finger protein 146	protein_coding	2.66613	4.18673	2.83005e-05	0.000566841	81	171	88	92	301	385	780	6.87244	7.80492	7.23587	7.0276	8.39089	8.21695	8.93505
ENSMUSG00000044434		Gm9791	predicted pseudogene 9791	processed_pseudogene	3.14911	4.18623	2.83629e-05	0.000567722	94	29	33	49	208	238	333	7.04712	5.81754	6.14178	6.3233	7.90398	7.59394	7.80114
ENSMUSG00000040809	12655	Chil3	chitinase-like 3	protein_coding	46.6497	4.18425	2.86103e-05	0.000569697	37	14	21	57	4959	134	337	6.03483	5.22876	5.71705	6.48415	12.3281	6.89555	7.81651
ENSMUSG00000023008	22379	Fmnl3	formin-like 3	protein_coding	1.8588	4.18304	2.87633e-05	0.000571903	367	232	247	311	695	810	1122	8.80244	8.20311	8.56781	8.58477	9.53616	9.22552	9.43691
ENSMUSG00000032690	246728	Oas2	2'-5' oligoadenylate synthetase 2	protein_coding	4.69531	4.18257	2.88236e-05	0.000572086	88	37	45	94	701	224	398	6.96917	6.04707	6.46412	7.05313	9.54814	7.51762	8.03248
ENSMUSG00000017446	56745	C1qtnf1	C1q and tumor necrosis factor related protein 1	protein_coding	2.17573	4.17947	2.92193e-05	0.000579562	327	203	252	368	737	843	1550	8.64574	8.02747	8.59486	8.81304	9.61802	9.28076	9.88855
ENSMUSG00000114500		Gm8983	predicted gene 8983	processed_pseudogene	6.76197	4.17536	2.97514e-05	0.000588974	2	15	13	12	101	44	215	4.28421	5.27829	5.32778	5.11769	7.00593	5.74644	7.2524
ENSMUSG00000028945	19744	Rheb	Ras homolog enriched in brain	protein_coding	2.23095	4.17164	3.02409e-05	0.000597506	520	1027	669	794	2191	2223	3865	9.28123	10.2517	9.94406	9.87869	11.1587	10.6429	11.1835
ENSMUSG00000052957	14451	Gas1	growth arrest specific 1	protein_coding	1.74347	4.17112	3.03112e-05	0.00059851	1668	1322	1192	1198	2354	4530	4904	10.9219	10.6093	10.761	10.459	11.2611	11.6581	11.5236
ENSMUSG00000074876		Spata5l1	spermatogenesis associated 5-like 1	processed_transcript	2.56582	4.16925	3.05598e-05	0.00060303	40	31	30	57	120	133	251	6.11138	5.87878	6.04765	6.48415	7.21238	6.88685	7.44319
ENSMUSG00000027777	30953	Schip1	schwannomin interacting protein 1	protein_coding	5.39085	4.16852	3.06579e-05	0.000604577	5	14	20	28	118	73	270	4.6266	5.22876	5.67453	5.77906	7.19201	6.23035	7.53446
ENSMUSG00000060126	22070	Tpt1	tumor protein, translationally-controlled 1	protein_coding	2.12355	4.16817	3.07056e-05	0.000605127	1448	1924	1420	1791	5070	3882	8008	10.7207	11.1433	11.0101	11.0305	12.3599	11.4373	12.2262
ENSMUSG00000040152	21825	Thbs1	thrombospondin 1	protein_coding	4.2623	4.16624	3.09667e-05	0.000609881	297	461	248	722	4111	1649	2011	8.51589	9.13223	8.57326	9.7454	12.0591	10.2199	10.2553
ENSMUSG00000041992	217944	Rapgef5	Rap guanine nucleotide exchange factor (GEF) 5	protein_coding	1.78277	4.16553	3.10628e-05	0.00061138	243	206	162	183	412	525	822	8.24781	8.04667	8.00749	7.88274	8.8148	8.63216	9.00695
ENSMUSG00000058587	50875	Tmod3	tropomodulin 3	protein_coding	1.75847	4.16289	3.14244e-05	0.000618101	875	986	707	940	2164	2073	3203	10.0081	10.1942	10.0218	10.1162	11.141	10.5437	10.9157
ENSMUSG00000096160		Gm3436	predicted pseudogene 3436	processed_pseudogene	2.39285	4.16202	3.15449e-05	0.000619675	43	66	34	39	154	162	206	6.1838	6.65365	6.17175	6.09134	7.52037	7.11974	7.20042
ENSMUSG00000042265	58217	Trem1	triggering receptor expressed on myeloid cells 1	protein_coding	31.2399	4.15955	3.18873e-05	0.000625198	37	26	10	13	2093	245	102	6.03483	5.71991	5.14149	5.17181	11.0934	7.63063	6.39839
ENSMUSG00000004730	13733	Adgre1	adhesion G protein-coupled receptor E1	protein_coding	4.27882	4.15852	3.20312e-05	0.000627217	290	120	281	243	2206	710	1563	8.48383	7.35822	8.74242	8.25452	11.1684	9.04388	9.90028
ENSMUSG00000082693		Gm15190	predicted gene 15190	processed_pseudogene	2.1382	4.15769	3.21477e-05	0.000628695	44	32	34	46	98	140	174	6.20711	5.90836	6.17175	6.25776	6.97039	6.94668	6.99847
ENSMUSG00000017737	17395	Mmp9	matrix metallopeptidase 9	protein_coding	12.743	4.15438	3.26175e-05	0.000637071	257	306	154	262	8848	1558	1661	8.32225	8.57305	7.9415	8.35468	13.1603	10.1398	9.98577
ENSMUSG00000020520	171212	Galnt10	polypeptide N-acetylgalactosaminyltransferase 10	protein_coding	1.8447	4.14937	3.33394e-05	0.000649928	471	345	280	379	912	939	1445	9.14447	8.73545	8.73757	8.85322	9.91648	9.43039	9.79014
ENSMUSG00000043733	19247	Ptpn11	protein tyrosine phosphatase, non-receptor type 11	protein_coding	1.51825	4.14816	3.35163e-05	0.000652132	1337	1534	1182	1568	2415	3460	4749	10.6074	10.8206	10.749	10.8411	11.2976	11.2729	11.4777
ENSMUSG00000042272	228071	Sestd1	SEC14 and spectrin domains 1	protein_coding	2.22024	4.14681	3.37142e-05	0.000655151	141	126	112	169	499	423	494	7.54348	7.41862	7.53422	7.78014	9.0772	8.342	8.31775
ENSMUSG00000033910	60596	Gucy1a1	guanylate cyclase 1, soluble, alpha 1	protein_coding	2.85239	4.14287	3.42981e-05	0.000665653	49	47	37	67	169	140	408	6.31801	6.28774	6.25788	6.66206	7.63763	6.94668	8.06498
ENSMUSG00000038623	107769	Tm6sf1	transmembrane 6 superfamily member 1	protein_coding	3.2516	4.14089	3.45968e-05	0.000670094	85	146	120	128	750	325	720	6.92852	7.60328	7.62125	7.42885	9.64244	7.99425	8.82568
ENSMUSG00000027399	16175	Il1a	interleukin 1 alpha	protein_coding	5.40066	4.14077	3.46144e-05	0.000670094	242	42	56	52	951	733	661	8.24234	6.17275	6.70529	6.38584	9.97534	9.08773	8.70937
ENSMUSG00000021576	18570	Pdcd6	programmed cell death 6	protein_coding	1.6102	4.13917	3.48561e-05	0.000673496	1065	1203	925	990	2258	2786	3103	10.2853	10.4755	10.4012	10.1893	11.2017	10.9639	10.8705
ENSMUSG00000053830		Gm9923	predicted pseudogene 9923	processed_pseudogene	9.05695	4.13896	3.48888e-05	0.000673703	3	1	1	7	19	37	86	4.41788	4.11081	4.15842	4.79554	5.3654	5.59685	6.22068
ENSMUSG00000056220	18783	Pla2g4a	phospholipase A2, group IVA (cytosolic, calcium-dependent)	protein_coding	2.12169	4.13863	3.49387e-05	0.000674242	98	158	124	138	400	393	533	7.09679	7.70361	7.66286	7.52282	8.77455	8.24419	8.4192
ENSMUSG00000025383	83430	Il23a	interleukin 23, alpha subunit p19	protein_coding	6.06005	4.13828	3.49923e-05	0.000674852	26	6	4	5	98	85	102	5.70888	4.71989	4.62649	4.62892	6.97039	6.38888	6.39839
ENSMUSG00000113188		Gm35638	predicted gene, 35638	processed_pseudogene	2.73468	4.13507	3.54848e-05	0.000683061	19	23	19	17	49	95	128	5.44789	5.61422	5.63055	5.36573	6.20817	6.50833	6.64579
ENSMUSG00000028862	53608	Map3k6	mitogen-activated protein kinase kinase kinase 6	protein_coding	2.42772	4.13454	3.55664e-05	0.000684052	478	268	206	199	760	1197	1498	9.16482	8.39496	8.3245	7.99166	9.66095	9.76923	9.84066
ENSMUSG00000024993	67894	Fam45a	family with sequence similarity 45, member A	protein_coding	2.0684	4.13445	3.5581e-05	0.000684052	107	148	109	133	388	349	491	7.20259	7.6205	7.50016	7.47661	8.73313	8.08751	8.30964
ENSMUSG00000030748	16190	Il4ra	interleukin 4 receptor, alpha	protein_coding	3.79563	4.13052	3.61936e-05	0.000691492	2043	827	1035	1683	11489	4720	6676	11.211	9.94646	10.5604	10.9419	13.5362	11.717	11.9653
ENSMUSG00000029209	67980	Gnpda2	glucosamine-6-phosphate deaminase 2	protein_coding	2.11148	4.12945	3.6363e-05	0.000693863	101	124	93	107	276	275	569	7.13294	7.39877	7.30338	7.20873	8.27535	7.778	8.50689
ENSMUSG00000023951	22339	Vegfa	vascular endothelial growth factor A	protein_coding	2.56525	4.1286	3.64983e-05	0.000695578	795	586	572	762	3187	1769	3021	9.87335	9.46454	9.72432	9.82096	11.6943	10.3192	10.8324
ENSMUSG00000082241		Gng5-ps	G protein subunit gamma 5, pseudogene	processed_pseudogene	3.43532	4.12526	3.7032e-05	0.000704436	28	9	13	17	79	76	124	5.77452	4.94129	5.32778	5.36573	6.72179	6.27174	6.61047
ENSMUSG00000027366	66552	Sppl2a	signal peptide peptidase like 2A	protein_coding	1.91267	4.12237	3.74995e-05	0.000712886	704	807	633	768	2125	1777	2739	9.70298	9.91205	9.86636	9.83196	11.1151	10.3255	10.6931
ENSMUSG00000028629	73172	Exo5	exonuclease 5	protein_coding	1.81291	4.1217	3.76081e-05	0.000714507	110	135	121	155	303	384	470	7.23617	7.50468	7.63177	7.66962	8.39974	8.2135	8.25156
ENSMUSG00000031465	11601	Angpt2	angiopoietin 2	protein_coding	5.13523	4.12072	3.77689e-05	0.000716644	117	36	32	105	824	358	372	7.31158	6.02046	6.11113	7.18587	9.7741	8.12098	7.94437
ENSMUSG00000009621	22325	Vav2	vav 2 oncogene	protein_coding	1.957	4.12071	3.77708e-05	0.000716644	164	166	124	161	444	385	613	7.73516	7.7668	7.66286	7.71803	8.91696	8.21695	8.60729
ENSMUSG00000025877	212032	Hk3	hexokinase 3	protein_coding	6.13425	4.12059	3.77907e-05	0.000716644	154	53	90	94	1623	356	444	7.65495	6.41408	7.26326	7.05313	10.7314	8.11361	8.17625
ENSMUSG00000017144	74194	Rnd3	Rho family GTPase 3	protein_coding	2.15104	4.11835	3.8159e-05	0.00072307	326	382	189	241	720	804	1504	8.64159	8.87425	8.21016	8.24356	9.58544	9.21524	9.84626
ENSMUSG00000040552	12267	C3ar1	complement component 3a receptor 1	protein_coding	3.95725	4.11825	3.81768e-05	0.00072307	290	109	203	275	1817	655	1399	8.48383	7.24037	8.30497	8.4194	10.892	8.93328	9.74482
ENSMUSG00000019173	19345	Rab5c	RAB5C, member RAS oncogene family	protein_coding	1.86799	4.1177	3.82674e-05	0.000723735	4014	2518	2381	2858	7547	8755	10045	12.1777	11.5276	11.7486	11.6981	12.9315	12.6032	12.5516
ENSMUSG00000036469	72925	Marchf1	membrane associated ring-CH-type finger 1	protein_coding	5.58659	4.11761	3.82827e-05	0.000723735	59	16	43	44	538	134	308	6.51609	5.32579	6.41538	6.21226	9.18091	6.89555	7.70118
ENSMUSG00000019861	94221	Gopc	golgi associated PDZ and coiled-coil motif containing	protein_coding	1.74788	4.11514	3.86942e-05	0.000730612	340	360	257	282	689	764	1208	8.69856	8.79334	8.6214	8.45308	9.52407	9.1448	9.53973
ENSMUSG00000032459	64655	Mrps22	mitochondrial ribosomal protein S22	protein_coding	1.70212	4.11485	3.87439e-05	0.00073065	212	206	186	179	356	564	758	8.06781	8.04667	8.189	7.85417	8.6165	8.72928	8.89591
ENSMUSG00000029836	12417	Cbx3	chromobox 3	protein_coding	1.97104	4.1146	3.87846e-05	0.000730968	70	87	89	80	185	264	358	6.70557	6.97052	7.24963	6.86391	7.75296	7.72571	7.89458
ENSMUSG00000026584	240880	Scyl3	SCY1-like 3 (S. cerevisiae)	protein_coding	2.12891	4.11431	3.88341e-05	0.000731451	132	185	107	127	406	368	649	7.46087	7.90656	7.477	7.4191	8.79482	8.15727	8.68452
ENSMUSG00000033717	11551	Adra2a	adrenergic receptor, alpha 2a	protein_coding	1.92819	4.11102	3.93909e-05	0.000739344	116	100	64	91	183	302	408	7.30105	7.1361	6.85777	7.01466	7.73904	7.89881	8.06498
ENSMUSG00000022150	13132	Dab2	disabled 2, mitogen-responsive phosphoprotein	protein_coding	2.19354	4.11098	3.93979e-05	0.000739344	926	547	803	991	2648	2483	3497	10.0879	9.36884	10.2013	10.1907	11.4292	10.8	11.0408
ENSMUSG00000015947	14129	Fcgr1	Fc receptor, IgG, high affinity I	protein_coding	5.36857	4.10907	3.97251e-05	0.000745028	355	68	215	205	2622	784	1501	8.75719	6.6871	8.38155	8.03047	11.4151	9.18045	9.84346
ENSMUSG00000058755	18413	Osm	oncostatin M	protein_coding	23.7551	4.10736	4.00208e-05	0.000750116	10	38	16	41	1824	421	109	4.9975	6.07317	5.4885	6.14101	10.8974	8.33568	6.46946
ENSMUSG00000036622	74772	Atp13a2	ATPase type 13A2	protein_coding	1.84695	4.1044	4.05371e-05	0.000758401	1207	1146	859	1105	2988	2589	3906	10.4624	10.4068	10.2965	10.3446	11.602	10.8595	11.1985
ENSMUSG00000043885	234967	Slc36a4	solute carrier family 36 (proton/amino acid symporter), member 4	protein_coding	1.82857	4.10197	4.0965e-05	0.000765656	207	150	161	165	370	467	721	8.03655	7.63751	7.9994	7.74942	8.66869	8.4744	8.82757
ENSMUSG00000032342	68291	Mto1	mitochondrial tRNA translation optimization 1	protein_coding	1.7005	4.10011	4.12955e-05	0.000770706	178	181	135	179	351	416	644	7.8404	7.87825	7.77142	7.85417	8.59739	8.31977	8.67404
ENSMUSG00000066363	238393	Serpina3f	serine (or cysteine) peptidase inhibitor, clade A, member 3F	protein_coding	44.771	4.09757	4.17502e-05	0.000778245	10	1	9	6	969	55	82	4.9975	4.11081	5.07183	4.71614	10.0017	5.95127	6.17238
ENSMUSG00000025185	67573	Loxl4	lysyl oxidase-like 4	protein_coding	3.52501	4.09473	4.22652e-05	0.000785933	44	16	26	29	175	102	198	6.20711	5.32579	5.91086	5.81072	7.68198	6.5862	7.15256
ENSMUSG00000031740	17390	Mmp2	matrix metallopeptidase 2	protein_coding	2.2694	4.09095	4.29607e-05	0.000796449	6280	2820	3177	4880	10862	14297	23290	12.8206	11.6897	12.162	12.4654	13.4554	13.3085	13.7614
ENSMUSG00000083670		Gm6829	predicted pseudogene 6829	processed_pseudogene	3.68154	4.09008	4.31217e-05	0.000798353	20	7	8	16	67	60	98	5.4887	4.79955	4.99734	5.32019	6.53853	6.03479	6.35608
ENSMUSG00000105189		Gm7774	predicted gene 7774	processed_pseudogene	2.5049	4.08983	4.31692e-05	0.000798383	26	41	23	26	96	101	158	5.70888	6.14853	5.79807	5.71331	6.9462	6.57534	6.88555
ENSMUSG00000063410	223255	Stk24	serine/threonine kinase 24	protein_coding	1.80586	4.08801	4.35097e-05	0.000803304	890	636	479	606	1251	2198	2380	10.032	9.57863	9.47664	9.50079	10.3622	10.6268	10.4937
ENSMUSG00000006050	24068	Sra1	steroid receptor RNA activator 1	protein_coding	1.81714	4.08798	4.35139e-05	0.000803304	958	838	583	850	2152	2109	2677	10.1358	9.96503	9.75099	9.97446	11.1331	10.5682	10.6606
ENSMUSG00000063286		Gm8995	predicted gene 8995	transcribed_unprocessed_pseudogene	4.73514	4.0852	4.40394e-05	0.000812178	130	56	79	62	938	294	408	7.44184	6.47315	7.10562	6.57594	9.95598	7.86406	8.06498
ENSMUSG00000001542	192657	Ell2	elongation factor RNA polymerase II 2	protein_coding	1.88692	4.08408	4.42517e-05	0.000814961	584	521	444	395	1310	1309	1806	9.44229	9.30131	9.37118	8.90972	10.4274	9.89469	10.1036
ENSMUSG00000020541	71943	Tom1l1	target of myb1-like 1 (chicken)	protein_coding	2.10515	4.08217	4.46168e-05	0.000821191	131	165	68	121	278	416	563	7.45139	7.75905	6.92823	7.35919	8.28494	8.31977	8.49264
ENSMUSG00000030693	69540	Klk10	kallikrein related-peptidase 10	protein_coding	3.73927	4.0814	4.47654e-05	0.000822937	2562	628	834	637	5460	7546	7959	11.5344	9.56097	10.2548	9.57033	12.4663	12.3898	12.2174
ENSMUSG00000039456	338467	Morc3	microrchidia 3	protein_coding	1.90286	4.08042	4.49549e-05	0.000825925	228	255	226	290	705	646	930	8.16352	8.3286	8.44833	8.49063	9.55607	8.91434	9.17688
ENSMUSG00000098112	668218	Bin2	bridging integrator 2	protein_coding	4.27628	4.08005	4.50268e-05	0.000826077	103	67	85	72	843	273	377	7.15654	6.67047	7.19376	6.74317	9.80606	7.76864	7.96174
ENSMUSG00000028163	18033	Nfkb1	nuclear factor of kappa light polypeptide gene enhancer in B cells 1, p105	protein_coding	1.78992	4.07966	4.51008e-05	0.000826623	938	1033	870	1068	2609	2423	3330	10.106	10.2599	10.3145	10.2964	11.408	10.7653	10.971
ENSMUSG00000032135	84004	Mcam	melanoma cell adhesion molecule	protein_coding	2.07491	4.07925	4.51821e-05	0.000827619	1155	670	778	1209	2827	3023	3575	10.4	9.65135	10.1566	10.4719	11.5228	11.0803	11.0722
ENSMUSG00000048865	226652	Arhgap30	Rho GTPase activating protein 30	protein_coding	3.10134	4.07853	4.53223e-05	0.000829195	263	148	219	224	1343	716	912	8.35301	7.6205	8.40619	8.14685	10.4627	9.05545	9.14991
ENSMUSG00000051682	224840	Treml4	triggering receptor expressed on myeloid cells-like 4	protein_coding	12.8357	4.07762	4.54996e-05	0.000831942	1	3	1	3	58	35	15	4.10811	4.42245	4.15842	4.41971	6.38324	5.55063	4.85009
ENSMUSG00000026482	19731	Rgl1	ral guanine nucleotide dissociation stimulator,-like 1	protein_coding	2.23995	4.07614	4.5789e-05	0.000835738	481	361	475	469	1584	1170	2056	9.17346	8.79712	9.46497	9.14558	10.6968	9.73727	10.2866
ENSMUSG00000070372	12340	Capza1	capping protein (actin filament) muscle Z-line, alpha 1	protein_coding	1.91009	4.0758	4.58559e-05	0.000836461	341	256	201	261	742	735	922	8.70254	8.33381	8.29181	8.34958	9.62746	9.09148	9.16496
ENSMUSG00000046031	215900	Calhm6	calcium homeostasis modulator family member 6	protein_coding	7.90024	4.07486	4.6043e-05	0.000839373	72	13	27	39	822	147	210	6.73743	5.17698	5.94641	6.09134	9.7707	7.00407	7.22376
ENSMUSG00000032554	22041	Trf	transferrin	protein_coding	3.88278	4.07373	4.62663e-05	0.000842944	2235	1168	1225	3363	13209	4834	18132	11.3392	10.4337	10.7998	11.9312	13.7371	11.7511	13.4009
ENSMUSG00000027580	229003	Helz2	helicase with zinc finger 2, transcriptional coactivator	protein_coding	3.30587	4.07019	4.69742e-05	0.000854824	159	123	83	139	863	353	609	7.69562	7.38874	7.16499	7.53188	9.83894	8.10248	8.59844
ENSMUSG00000031101	74131	Sash3	SAM and SH3 domain containing 3	protein_coding	3.85308	4.0673	4.75616e-05	0.000865001	98	38	60	68	543	246	328	7.09679	6.07317	6.7836	6.67866	9.19369	7.63579	7.7817
ENSMUSG00000020312	216148	Shc2	SHC (Src homology 2 domain containing) transforming protein 2	protein_coding	1.96719	4.06709	4.7604e-05	0.000865258	161	125	143	198	382	433	715	7.71157	7.40873	7.8455	7.98509	8.71197	8.37318	8.81618
ENSMUSG00000029915	23845	Clec5a	C-type lectin domain family 5, member a	protein_coding	6.68801	4.06636	4.77522e-05	0.000866923	45	12	21	41	520	144	136	6.23002	5.1227	5.71705	6.14101	9.13397	6.97976	6.71384
ENSMUSG00000027669	14696	Gnb4	guanine nucleotide binding protein (G protein), beta 4	protein_coding	1.80107	4.06489	4.80551e-05	0.00087139	162	150	145	154	384	393	561	7.71947	7.63751	7.86344	7.66138	8.71906	8.24419	8.48786
ENSMUSG00000025612	12013	Bach1	BTB and CNC homology 1, basic leucine zipper transcription factor 1	protein_coding	1.90892	4.06415	4.82087e-05	0.000873158	490	376	395	463	1221	1082	1651	9.19905	8.85263	9.20924	9.12783	10.3278	9.62793	9.97727
ENSMUSG00000019539	52377	Rcn3	reticulocalbin 3, EF-hand calcium binding domain	protein_coding	1.91766	4.06414	4.82096e-05	0.000873158	2418	1438	1615	2176	4649	5170	8204	11.4517	10.7287	11.1936	11.3083	12.2355	11.8474	12.2609
ENSMUSG00000018930	20303	Ccl4	chemokine (C-C motif) ligand 4	protein_coding	20.2226	4.06391	4.82567e-05	0.000873495	41	54	28	58	2512	912	91	6.13595	6.43405	5.98102	6.503	11.3539	9.38985	6.27873
ENSMUSG00000021264	22632	Yy1	YY1 transcription factor	protein_coding	1.54072	4.06294	4.84583e-05	0.000876626	949	1009	726	1029	1813	2149	3024	10.1225	10.2267	10.0591	10.2438	10.8888	10.5948	10.8338
ENSMUSG00000022014	108670	Epsti1	epithelial stromal interaction 1 (breast)	protein_coding	3.44125	4.06219	4.86148e-05	0.000878939	205	87	143	115	960	491	677	8.02385	6.97052	7.8455	7.29664	9.98859	8.54179	8.74185
ENSMUSG00000015247	66536	Nipsnap3b	nipsnap homolog 3B	protein_coding	2.02814	4.06005	4.90627e-05	0.000884947	136	110	150	149	379	396	585	7.49817	7.25149	7.90733	7.61951	8.70127	8.25428	8.54422
ENSMUSG00000079575		Rbpj-ps3	recombination signal binding protein for immunoglobulin kappa J region, pseudogene 3	processed_pseudogene	7.40696	4.05968	4.9141e-05	0.000885839	2	4	3	5	26	21	88	4.28421	4.5346	4.50295	4.62892	5.61712	5.16567	6.2442
ENSMUSG00000070577	230909	Gm572	predicted gene 572	protein_coding	10.336	4.05891	4.93026e-05	0.00088823	0	11	2	5	36	42	168	3.67762	5.06559	4.3545	4.62892	5.90706	5.70546	6.95718
ENSMUSG00000046879	15944	Irgm1	immunity-related GTPase family M member 1	protein_coding	5.44127	4.05835	4.94214e-05	0.000889847	435	316	235	337	4862	843	1492	9.03503	8.61647	8.50076	8.6934	12.2998	9.28076	9.83503
ENSMUSG00000096544		Gm4617	predicted pseudogene 4617	processed_pseudogene	1.71358	4.05678	4.97543e-05	0.000893739	1119	1316	938	1002	1815	3652	3985	10.3552	10.6028	10.421	10.2063	10.8904	11.35	11.2271
ENSMUSG00000098111		Gm4654	predicted gene 4654	processed_pseudogene	3.43663	4.05296	5.05731e-05	0.000905794	11	22	11	17	68	56	135	5.0575	5.57693	5.20703	5.36573	6.55476	5.9684	6.70551
ENSMUSG00000057335	545389	Cep170	centrosomal protein 170	protein_coding	2.19586	4.05238	5.06995e-05	0.000907527	104	88	92	136	349	290	465	7.16819	6.98397	7.29013	7.50451	8.58967	7.84637	8.23738
ENSMUSG00000089648		Gm15790	predicted pseudogene 15790	processed_pseudogene	15.4339	4.0512	5.0955e-05	0.000911567	0	1	2	1	12	35	33	3.67762	4.11081	4.3545	4.10919	5.04499	5.55063	5.36679
ENSMUSG00000025929	16171	Il17a	interleukin 17A	protein_coding	40.5748	4.04882	5.14762e-05	0.000920354	3	0	0	0	40	6	106	4.41788	3.67762	3.67762	3.67762	6.00713	4.49766	6.43945
ENSMUSG00000021224	18222	Numb	NUMB endocytic adaptor protein	protein_coding	1.79994	4.04821	5.16112e-05	0.00092223	461	328	245	321	678	999	1340	9.1149	8.6669	8.55685	8.62753	9.50165	9.51659	9.68452
ENSMUSG00000037503	214469	Fam168b	family with sequence similarity 168, member B	protein_coding	1.50103	4.0443	5.24786e-05	0.000934562	1527	1452	1040	1299	2329	3633	3809	10.7962	10.7425	10.5673	10.5737	11.2459	11.3426	11.1626
ENSMUSG00000039756	99480	Dnttip2	deoxynucleotidyltransferase, terminal, interacting protein 2	protein_coding	1.72161	4.04319	5.27292e-05	0.000938378	446	504	370	487	1082	1067	1611	9.06936	9.25538	9.11903	9.19756	10.1571	9.60843	9.94279
ENSMUSG00000105096	626578	Gbp10	guanylate-binding protein 10	protein_coding	182.852	4.04204	5.29875e-05	0.000942427	0	1	1	5	1067	7	76	3.67762	4.11081	4.15842	4.62892	10.1374	4.56145	6.09654
ENSMUSG00000041134	224405	Cyyr1	cysteine and tyrosine-rich protein 1	protein_coding	6.16102	4.04102	5.32186e-05	0.000944891	2	14	13	13	115	44	152	4.28421	5.22876	5.32778	5.17181	7.1609	5.74644	6.84076
ENSMUSG00000082292		Gm12250	predicted gene 12250	processed_pseudogene	18.0808	4.04063	5.33073e-05	0.000945919	36	9	10	23	1016	100	235	6.00832	4.94129	5.14149	5.60788	10.0684	6.56439	7.36153
ENSMUSG00000027750	50706	Postn	periostin, osteoblast specific factor	protein_coding	2.96502	4.04024	5.33968e-05	0.000946411	2590	2108	3163	3969	6124	11803	29667	11.55	11.2737	12.1556	12.1688	12.6312	13.0327	14.1099
ENSMUSG00000025473	11501	Adam8	a disintegrin and metallopeptidase domain 8	protein_coding	4.66046	4.04004	5.34411e-05	0.000946649	379	186	196	325	3100	1250	821	8.84631	7.91355	8.25835	8.64428	11.6547	9.82996	9.00528
ENSMUSG00000032596	74153	Uba7	ubiquitin-like modifier activating enzyme 7	protein_coding	3.64801	4.03959	5.35446e-05	0.000947388	283	157	190	236	1754	597	1089	8.45104	7.69552	8.21714	8.21579	10.8417	8.80664	9.39542
ENSMUSG00000042626	20416	Shc1	src homology 2 domain-containing transforming protein C1	protein_coding	1.60622	4.0392	5.36343e-05	0.000948426	834	648	524	639	1165	1854	2251	9.94062	9.60471	9.6018	9.5747	10.2615	10.3856	10.4148
ENSMUSG00000027287	20619	Snap23	synaptosomal-associated protein 23	protein_coding	2.63494	4.03894	5.36926e-05	0.000948777	295	395	329	334	1595	818	1759	8.5068	8.92	8.95764	8.68128	10.7066	9.23911	10.0665
ENSMUSG00000056493	17425	Foxk1	forkhead box K1	protein_coding	1.50144	4.03838	5.38227e-05	0.000950113	428	443	359	480	722	1063	1408	9.01275	9.07738	9.07747	9.17757	9.58931	9.60319	9.7538
ENSMUSG00000013974	69189	Mcemp1	mast cell expressed membrane protein 1	protein_coding	20.7738	4.03814	5.38776e-05	0.000950535	32	13	18	41	1661	197	160	5.89661	5.17698	5.58497	6.14101	10.7643	7.3578	6.90017
ENSMUSG00000004631	20392	Sgce	sarcoglycan, epsilon	protein_coding	2.22902	4.03699	5.41422e-05	0.000954653	147	129	147	175	438	374	849	7.59601	7.44789	7.88116	7.82501	8.89835	8.17862	9.05135
ENSMUSG00000043157	219144	Arl11	ADP-ribosylation factor-like 11	protein_coding	3.61177	4.03594	5.43848e-05	0.000957806	44	25	40	48	294	144	196	6.20711	5.68565	6.33889	6.3018	8.35946	6.97976	7.14034
ENSMUSG00000070323	234911	Mmp27	matrix metallopeptidase 27	protein_coding	4.18136	4.03589	5.43946e-05	0.000957806	34	7	23	23	145	92	201	5.95364	4.79955	5.79807	5.60788	7.44509	6.47356	7.1707
ENSMUSG00000062488	667370	Ifit3b	interferon-induced protein with tetratricopeptide repeats 3B	protein_coding	4.35669	4.03581	5.44148e-05	0.000957806	84	44	61	72	654	168	415	6.91471	6.21992	6.80251	6.74317	9.45149	7.16349	8.0873
ENSMUSG00000051674	100737	Dcun1d4	DCN1, defective in cullin neddylation 1, domain containing 4 (S. cerevisiae)	protein_coding	2.03837	4.0352	5.45567e-05	0.000959203	89	69	56	71	168	200	356	6.98246	6.70353	6.70529	6.72732	7.63011	7.37647	7.88733
ENSMUSG00000050075	229323	Gpr171	G protein-coupled receptor 171	protein_coding	14.7363	4.03406	5.4822e-05	0.000963315	1	10	5	11	304	21	56	4.10811	5.00528	4.73396	5.06075	8.40415	5.16567	5.80723
ENSMUSG00000087119		Atg4a-ps	autophagy related 4A, pseudogene	protein_coding	5.18205	4.03352	5.49473e-05	0.000964411	7	25	9	9	58	60	222	4.79285	5.68565	5.07183	4.93682	6.38324	6.03479	7.29155
ENSMUSG00000063628		Gm7665	predicted pseudogene 7665	processed_pseudogene	2.06353	4.03352	5.49473e-05	0.000964411	1463	782	784	952	2329	4151	3538	10.7354	9.86786	10.1675	10.1341	11.2459	11.5331	11.0574
ENSMUSG00000028397	76804	Kdm4c	lysine (K)-specific demethylase 4C	protein_coding	1.81735	4.03216	5.52658e-05	0.000968907	150	174	121	180	316	413	691	7.62157	7.82731	7.63177	7.86136	8.45601	8.31013	8.76968
ENSMUSG00000047669	73390	Msl3l2	MSL3 like 2	protein_coding	3.04183	4.03196	5.53126e-05	0.000969156	20	24	38	23	126	111	152	5.4887	5.65044	6.28542	5.60788	7.2718	6.68033	6.84076
ENSMUSG00000106181		Gm9523	predicted gene 9523	processed_pseudogene	13.5163	4.03152	5.5418e-05	0.000970449	0	2	1	5	28	16	96	3.67762	4.28798	4.15842	4.62892	5.68058	4.9892	6.33442
ENSMUSG00000036356	234356	Csgalnact1	chondroitin sulfate N-acetylgalactosaminyltransferase 1	protein_coding	2.87352	4.02981	5.58218e-05	0.000976962	102	144	68	114	577	319	485	7.14479	7.58585	6.92823	7.28594	9.27766	7.96996	8.29329
ENSMUSG00000045427	56258	Hnrnph2	heterogeneous nuclear ribonucleoprotein H2	protein_coding	1.77263	4.02915	5.59789e-05	0.000978593	636	771	593	678	1728	1651	2324	9.56108	9.84798	9.77481	9.65743	10.8205	10.2216	10.46
ENSMUSG00000037742	13627	Eef1a1	eukaryotic translation elongation factor 1 alpha 1	protein_coding	1.62401	4.02859	5.61135e-05	0.000979793	45169	45229	34015	35095	86234	99147	129008	15.6627	15.6827	15.5751	15.3061	16.4415	16.0992	16.2289
ENSMUSG00000079111	66913	Kdelr2	KDEL (Lys-Asp-Glu-Leu) endoplasmic reticulum protein retention receptor 2	protein_coding	1.6661	4.02687	5.65251e-05	0.000984771	1246	1041	1033	1181	2632	2767	3664	10.5075	10.2708	10.5577	10.4387	11.4206	10.9542	11.1073
ENSMUSG00000051048	320452	P4ha3	procollagen-proline, 2-oxoglutarate 4-dioxygenase (proline 4-hydroxylase), alpha polypeptide III	protein_coding	4.41028	4.02453	5.70903e-05	0.000993487	21	8	22	22	145	62	176	5.5282	4.87298	5.7582	5.57068	7.44509	6.06679	7.01197
ENSMUSG00000044165	229672	Bcl2l15	BCLl2-like 15	protein_coding	4.08446	4.0238	5.72673e-05	0.000996003	35	10	15	33	164	155	108	5.98126	5.00528	5.43727	5.9302	7.5996	7.06693	6.45953
ENSMUSG00000024672	109225	Ms4a7	membrane-spanning 4-domains, subfamily A, member 7	protein_coding	4.03742	4.02348	5.73446e-05	0.00099678	358	67	215	214	1586	1011	1361	8.76864	6.67047	8.38155	8.08677	10.6986	9.53323	9.70627
ENSMUSG00000020709	216991	Adap2	ArfGAP with dual PH domains 2	protein_coding	3.55838	4.02308	5.74426e-05	0.000997919	35	9	24	26	132	107	160	5.98126	4.94129	5.83676	5.71331	7.32883	6.63928	6.90017
ENSMUSG00000039910	17684	Cited2	Cbp/p300-interacting transactivator, with Glu/Asp-rich carboxy-terminal domain, 2	protein_coding	1.55783	4.0229	5.74865e-05	0.000998115	818	969	748	972	1565	2140	3102	9.9134	10.1696	10.1012	10.1634	10.6797	10.5889	10.8701
ENSMUSG00000071533	76302	Pcnp	PEST proteolytic signal containing nuclear protein	protein_coding	1.68137	4.02264	5.75498e-05	0.000998648	327	330	260	340	696	729	1158	8.64574	8.67514	8.6371	8.70542	9.53816	9.0802	9.48084
ENSMUSG00000117877		Gm8184	predicted gene 8184	processed_pseudogene	3.63497	4.02116	5.7913e-05	0.00100438	19	8	20	9	62	75	121	5.44789	4.87298	5.67453	4.93682	6.45442	6.25809	6.58339
ENSMUSG00000025511	64540	Tspan4	tetraspanin 4	protein_coding	2.49093	4.0208	5.80004e-05	0.00100476	988	828	866	1058	4336	2440	3896	10.1793	9.94815	10.308	10.2831	12.1355	10.7752	11.1949
ENSMUSG00000023074	70380	Mospd1	motile sperm domain containing 1	protein_coding	1.8441	4.01997	5.82051e-05	0.00100774	298	291	292	404	663	868	1453	8.52041	8.50536	8.79466	8.94055	9.47051	9.32125	9.79788
ENSMUSG00000034593	17918	Myo5a	myosin VA	protein_coding	1.5432	4.01796	5.87034e-05	0.00101579	634	719	491	603	1081	1760	1797	9.55669	9.75009	9.5111	9.49388	10.1558	10.3119	10.0966
ENSMUSG00000003283	15162	Hck	hemopoietic cell kinase	protein_coding	5.73559	4.01754	5.88101e-05	0.00101649	140	74	115	83	1626	304	488	7.53453	6.78292	7.56748	6.90665	10.734	7.90736	8.30149
ENSMUSG00000083327		Vcp-rs	valosin containing protein, related sequence	processed_pseudogene	1.45154	4.01746	5.883e-05	0.00101649	2547	2155	1804	2352	3542	5684	6725	11.526	11.3051	11.3516	11.4194	11.8455	11.9832	11.9758
ENSMUSG00000113258		Gm7446	predicted gene 7446	processed_pseudogene	31.9396	4.01574	5.92584e-05	0.00102308	0	2	0	0	20	17	43	3.67762	4.28798	3.67762	3.67762	5.40471	5.02689	5.57755
ENSMUSG00000057262		Rpl15-ps6	ribosomal protein L15, pseudogene 6	processed_pseudogene	2.4493	4.01518	5.94016e-05	0.00102498	40	37	28	21	91	150	137	6.11138	6.04707	5.98102	5.53234	6.88383	7.02797	6.72211
ENSMUSG00000045767	78521	B230219D22Rik	RIKEN cDNA B230219D22 gene	protein_coding	2.13314	4.01209	6.01823e-05	0.00103697	234	354	206	283	752	670	1401	8.19783	8.77047	8.3245	8.45783	9.64616	8.9643	9.74682
ENSMUSG00000017057	16164	Il13ra1	interleukin 13 receptor, alpha 1	protein_coding	2.0015	4.01203	6.01979e-05	0.00103697	1495	972	1105	1014	3432	3616	3878	10.7661	10.174	10.6533	10.2231	11.8003	11.3359	11.1882
ENSMUSG00000035284	320528	Vps13c	vacuolar protein sorting 13C	protein_coding	2.34105	4.01187	6.02408e-05	0.00103712	65	84	65	102	202	227	509	6.62262	6.92939	6.87572	7.15088	7.86609	7.53432	8.35762
ENSMUSG00000053291	19342	Rab4b	RAB4B, member RAS oncogene family	protein_coding	2.38972	4.01011	6.06907e-05	0.0010437	75	64	63	47	234	189	289	6.78389	6.61937	6.83959	6.27996	8.05752	7.30679	7.62024
ENSMUSG00000034602	67074	Mon2	MON2 homolog, regulator of endosome to Golgi trafficking	protein_coding	1.54125	4.00932	6.08928e-05	0.00104483	762	772	580	760	1472	1667	2231	9.81386	9.8498	9.74377	9.81728	10.5927	10.2352	10.4022
ENSMUSG00000063779	104183	Chil4	chitinase-like 4	protein_coding	54.0297	4.00858	6.10845e-05	0.00104753	0	0	0	0	5	21	27	3.67762	3.67762	3.67762	3.67762	4.57893	5.16567	5.21982
ENSMUSG00000050721	102595	Plekho2	pleckstrin homology domain containing, family O member 2	protein_coding	2.63108	4.00841	6.113e-05	0.00104772	663	345	410	571	2345	1433	2221	9.6191	8.73545	9.26077	9.41803	11.2556	10.022	10.3958
ENSMUSG00000020484	22433	Xbp1	X-box binding protein 1	protein_coding	2.0449	4.00727	6.14254e-05	0.00105161	2348	1509	1620	2368	5936	5054	8195	11.4097	10.7972	11.198	11.4291	12.5864	11.8149	12.2594
ENSMUSG00000024885	67689	Aldh3b1	aldehyde dehydrogenase 3 family, member B1	protein_coding	3.39088	4.00573	6.18263e-05	0.0010567	220	119	182	214	1336	590	825	8.11646	7.3479	8.1603	8.08677	10.4552	8.79057	9.01195
ENSMUSG00000024420	225207	Zfp521	zinc finger protein 521	protein_coding	2.08634	4.00481	6.20666e-05	0.00105845	100	125	98	124	257	300	625	7.121	7.40873	7.36784	7.38946	8.18087	7.8902	8.6335
ENSMUSG00000041763	22019	Tpp2	tripeptidyl peptidase II	protein_coding	1.58335	4.00448	6.21543e-05	0.00105935	563	504	542	587	980	1482	1894	9.3914	9.25538	9.64898	9.45646	10.0176	10.0693	10.1707
ENSMUSG00000043673	238076	Kcns3	potassium voltage-gated channel, delayed-rectifier, subfamily S, member 3	protein_coding	3.63598	4.00203	6.28e-05	0.00106917	15	25	6	18	68	66	153	5.26916	5.68565	4.82993	5.40958	6.55476	6.12858	6.84833
ENSMUSG00000059013	27387	Sh2d3c	SH2 domain containing 3C	protein_coding	3.12312	4.00058	6.31886e-05	0.00107519	183	118	66	154	762	552	467	7.87619	7.33751	6.89344	7.66138	9.66463	8.70009	8.24307
ENSMUSG00000051022	15476	Hs3st1	heparan sulfate (glucosamine) 3-O-sulfotransferase 1	protein_coding	2.30801	4.00002	6.33384e-05	0.00107714	63	51	88	75	208	287	296	6.58801	6.37324	7.23587	6.78967	7.90398	7.83295	7.6506
ENSMUSG00000113991		Gm48151	predicted gene, 48151	processed_pseudogene	48.1915	3.99964	6.34391e-05	0.00107825	0	0	0	0	13	11	19	3.67762	3.67762	3.67762	3.67762	5.09678	4.77623	4.98827
ENSMUSG00000000386		Mx1	MX dynamin-like GTPase 1	polymorphic_pseudogene	3.79056	3.99829	6.38019e-05	0.00108216	50	11	24	17	124	138	214	6.33915	5.06559	5.83676	5.36573	7.25227	6.92984	7.24671
ENSMUSG00000046108	234836	Il17c	interleukin 17C	protein_coding	52.7278	3.99826	6.381e-05	0.00108216	2	0	0	0	18	7	121	4.28421	3.67762	3.67762	3.67762	5.32476	4.56145	6.58339
ENSMUSG00000057135	327957	Scimp	SLP adaptor and CSK interacting membrane protein	protein_coding	7.70056	3.9976	6.39885e-05	0.00108458	36	7	14	14	367	89	92	6.00832	4.79955	5.38378	5.22344	8.65767	6.43791	6.29005
ENSMUSG00000049488	329795	Tmem67	transmembrane protein 67	protein_coding	2.954	3.99529	6.46149e-05	0.00109339	29	13	28	23	94	92	154	5.80613	5.17698	5.98102	5.60788	6.92158	6.47356	6.85585
ENSMUSG00000031696	65114	Vps35	VPS35 retromer complex component	protein_coding	2.10004	3.99507	6.46746e-05	0.00109379	673	1099	709	817	2261	2072	4227	9.64001	10.3475	10.0257	9.91879	11.2036	10.5431	11.3113
ENSMUSG00000023000	13363	Dhh	desert hedgehog	protein_coding	2.50931	3.99322	6.51826e-05	0.00109996	60	30	33	33	127	135	218	6.53442	5.84852	6.14178	5.9302	7.28146	6.9042	7.26931
ENSMUSG00000084215		Gm11814	predicted gene 11814	processed_pseudogene	2.5948	3.99136	6.56951e-05	0.00110617	68	55	76	107	250	224	523	6.67298	6.45374	7.0594	7.20873	8.14444	7.51762	8.39386
ENSMUSG00000003033	11767	Ap1m1	adaptor-related protein complex AP-1, mu subunit 1	protein_coding	1.70298	3.98979	6.6132e-05	0.00111291	495	527	384	551	1148	1143	1735	9.21308	9.31718	9.17024	9.36851	10.2407	9.7046	10.0471
ENSMUSG00000082791		Gm4875	predicted gene 4875	processed_pseudogene	36.2914	3.98902	6.63457e-05	0.00111528	0	0	0	1	18	15	19	3.67762	3.67762	3.67762	4.10919	5.32476	4.95009	4.98827
ENSMUSG00000026946	64685	Nmi	N-myc (and STAT) interactor	protein_coding	3.02277	3.98871	6.64347e-05	0.00111574	183	158	172	195	1112	487	792	7.87619	7.70361	8.08592	7.9652	10.1957	8.53077	8.95596
ENSMUSG00000016918	240725	Sulf1	sulfatase 1	protein_coding	2.72625	3.98854	6.64817e-05	0.00111574	188	167	230	210	968	510	1089	7.91111	7.7745	8.47187	8.06202	10.0003	8.59299	9.39542
ENSMUSG00000020154	19263	Ptprb	protein tyrosine phosphatase, receptor type, B	protein_coding	1.86636	3.98787	6.66696e-05	0.00111828	496	388	483	532	1038	1265	2165	9.21587	8.89555	9.48822	9.31984	10.0986	9.8467	10.3597
ENSMUSG00000079293	56644	Clec7a	C-type lectin domain family 7, member a	polymorphic_pseudogene	17.4784	3.98581	6.72505e-05	0.00112556	63	56	20	64	2657	302	324	6.58801	6.47315	5.67453	6.61103	11.4341	7.89881	7.76595
ENSMUSG00000029270	67266	Dipk1a	divergent protein kinase domain 1A	protein_coding	1.69595	3.98453	6.76128e-05	0.00112915	300	294	200	290	548	656	1066	8.52941	8.51915	8.28518	8.49063	9.20635	8.93537	9.36579
ENSMUSG00000111964		Gm8942	predicted gene 8942	processed_pseudogene	1.70716	3.98438	6.76565e-05	0.00112927	603	553	434	487	1182	1215	1928	9.48684	9.38398	9.33958	9.19756	10.2819	9.79014	10.1958
ENSMUSG00000085783		Gm9816	predicted pseudogene 9816	processed_pseudogene	2.18705	3.98414	6.77243e-05	0.00112978	198	281	199	201	591	552	1270	7.97849	8.4584	8.27852	8.00471	9.31087	8.70009	9.60955
ENSMUSG00000021279	217866	Cdc42bpb	CDC42 binding protein kinase beta	protein_coding	1.62822	3.98331	6.79615e-05	0.00113312	1059	774	686	812	1555	2172	3002	10.2773	9.85343	9.97934	9.91017	10.6706	10.6099	10.8234
ENSMUSG00000016018	72198	Mtrex	Mtr4 exosome RNA helicase	protein_coding	2.08236	3.98307	6.80314e-05	0.00113367	278	503	280	425	934	1056	1838	8.42715	9.25263	8.73757	9.01004	9.94998	9.59397	10.1284
ENSMUSG00000084099		Gm12929	predicted gene 12929	processed_pseudogene	5.11418	3.98128	6.85443e-05	0.00114113	8	7	9	5	18	74	109	4.86588	4.79955	5.07183	4.62892	5.32476	6.24429	6.46946
ENSMUSG00000023087	12457	Noct	nocturnin	protein_coding	2.18397	3.9811	6.85976e-05	0.00114113	448	335	347	450	1395	962	1726	9.07552	8.69552	9.03073	9.08861	10.5165	9.46405	10.0398
ENSMUSG00000034401	67946	Spata6	spermatogenesis associated 6	protein_coding	1.92846	3.98092	6.865e-05	0.00114113	181	139	116	206	421	436	635	7.86198	7.54133	7.5784	8.03683	8.84427	8.3824	8.65498
ENSMUSG00000021624	17079	Cd180	CD180 antigen	protein_coding	4.15601	3.98081	6.86803e-05	0.00114113	48	15	37	17	210	116	257	6.29654	5.27829	6.25788	5.36573	7.9164	6.73001	7.47264
ENSMUSG00000084104		Gm13578	predicted gene 13578	processed_pseudogene	3.48725	3.98039	6.88025e-05	0.00114155	32	57	18	23	180	110	243	5.89661	6.49229	5.58497	5.60788	7.7179	6.67018	7.40294
ENSMUSG00000031628	12367	Casp3	caspase 3	protein_coding	2.1183	3.97783	6.95462e-05	0.00115327	294	267	194	314	938	772	901	8.50224	8.38996	8.24474	8.59773	9.95598	9.15917	9.13318
ENSMUSG00000002307	13163	Daxx	Fas death domain-associated protein	protein_coding	1.65205	3.97734	6.9691e-05	0.00115505	532	514	405	469	1121	1185	1503	9.31283	9.28257	9.2438	9.14558	10.2071	9.75511	9.84533
ENSMUSG00000047686	213436	Rtl3	retrotransposon Gag like 3	protein_coding	3.33831	3.97683	6.98393e-05	0.00115688	27	14	17	18	47	95	192	5.74212	5.22876	5.53768	5.40958	6.16601	6.50833	7.11558
ENSMUSG00000035697	70719	Arhgap45	Rho GTPase activating protein 45	protein_coding	2.90559	3.97648	6.99438e-05	0.00115798	502	396	379	449	2598	1179	1780	9.23249	8.92347	9.15216	9.08555	11.402	9.748	10.0832
ENSMUSG00000080981		Gm12161	predicted gene 12161	processed_pseudogene	4.71636	3.97548	7.02386e-05	0.00116161	4	6	7	3	26	48	44	4.52938	4.71989	4.91713	4.41971	5.61712	5.82469	5.59677
ENSMUSG00000070031	434484	Sp140	Sp140 nuclear body protein	protein_coding	4.49186	3.97531	7.02867e-05	0.00116178	79	45	54	77	705	203	290	6.84354	6.24291	6.66443	6.81984	9.55607	7.3949	7.62462
ENSMUSG00000095362	329575	Gm14325	predicted gene 14325	protein_coding	5.12831	3.97502	7.03747e-05	0.00116261	6	13	5	3	46	35	90	4.71362	5.17698	4.73396	4.41971	6.14443	5.55063	6.26732
ENSMUSG00000061559	66317	Wdr61	WD repeat domain 61	protein_coding	1.46422	3.97304	7.09622e-05	0.00117105	1009	931	850	892	1572	2422	2674	10.209	10.1132	10.2816	10.0423	10.686	10.7647	10.659
ENSMUSG00000032458	50797	Copb2	coatomer protein complex, subunit beta 2 (beta prime)	protein_coding	1.41258	3.9717	7.13621e-05	0.00117701	2422	2414	1937	2315	4095	5196	6369	11.4541	11.4673	11.4533	11.3967	12.0535	11.8546	11.8978
ENSMUSG00000002885	26364	Adgre5	adhesion G protein-coupled receptor E5	protein_coding	2.80488	3.97107	7.15517e-05	0.00117887	225	199	277	302	1282	640	1383	8.14606	8.00147	8.72294	8.54518	10.3968	8.90158	9.72872
ENSMUSG00000007655	12389	Cav1	caveolin 1, caveolae protein	protein_coding	1.92716	3.96919	7.21174e-05	0.00118564	1786	1839	1294	2321	3445	5022	9235	11.0193	11.0789	10.8778	11.4004	11.8057	11.8058	12.4309
ENSMUSG00000021814	11750	Anxa7	annexin A7	protein_coding	1.4206	3.96899	7.21781e-05	0.001186	4393	4043	3700	4072	7097	9995	11161	12.3072	12.2061	12.3807	12.2056	12.8431	12.7936	12.703
ENSMUSG00000028270	14469	Gbp2	guanylate binding protein 2	protein_coding	20.0573	3.96858	7.23035e-05	0.00118679	555	166	153	266	17091	1648	2697	9.37153	7.7668	7.93303	8.3749	14.1082	10.219	10.6712
ENSMUSG00000036931	243910	Nfkbid	nuclear factor of kappa light polypeptide gene enhancer in B cells inhibitor, delta	protein_coding	3.92455	3.96642	7.29597e-05	0.00119619	93	53	59	58	472	511	158	7.03442	6.41408	6.76443	6.503	9.00076	8.59563	6.88555
ENSMUSG00000036553	231147	Sh3tc1	SH3 domain and tetratricopeptide repeats 1	protein_coding	2.14861	3.96471	7.34862e-05	0.00120234	146	85	94	151	359	350	522	7.58739	6.94323	7.31651	7.63641	8.62784	8.09127	8.3913
ENSMUSG00000058624	14544	Gda	guanine deaminase	protein_coding	3.33298	3.96055	7.47769e-05	0.00122281	880	555	802	1007	5757	2092	4197	10.0161	9.38899	10.1995	10.2133	12.5424	10.5567	11.3011
ENSMUSG00000020253	67905	Ppm1m	protein phosphatase 1M	protein_coding	2.11973	3.958	7.55799e-05	0.00123423	422	365	341	469	1279	909	1883	8.99337	8.81213	9.00678	9.14558	10.3935	9.38528	10.1625
ENSMUSG00000027194	74569	Ttc17	tetratricopeptide repeat domain 17	protein_coding	1.70658	3.95795	7.5596e-05	0.00123423	314	242	258	348	551	807	1122	8.5909	8.25902	8.62665	8.737	9.21389	9.22039	9.43691
ENSMUSG00000035778	14594	Ggta1	glycoprotein galactosyltransferase alpha 1, 3	protein_coding	1.78885	3.95617	7.61606e-05	0.00124212	601	582	376	525	1363	1347	1703	9.48221	9.45501	9.1412	9.30149	10.4836	9.9349	10.0209
ENSMUSG00000082988		Gm5903	predicted gene 5903	processed_pseudogene	11.8953	3.95387	7.68971e-05	0.00125346	1	2	3	0	11	36	49	4.10811	4.28798	4.50295	3.67762	4.99055	5.57395	5.68871
ENSMUSG00000020075	56200	Ddx21	DEAD (Asp-Glu-Ala-Asp) box polypeptide 21	protein_coding	1.45874	3.951	7.78252e-05	0.0012659	1396	1328	941	1255	2109	3194	3475	10.6688	10.6157	10.4255	10.5248	11.1043	11.1587	11.0318
ENSMUSG00000056870	70676	Gulp1	GULP, engulfment adaptor PTB domain containing 1	protein_coding	2.57193	3.94938	7.83524e-05	0.00127312	44	64	30	38	154	129	268	6.20711	6.61937	6.04765	6.06579	7.52037	6.85149	7.52512
ENSMUSG00000022807	106326	Osbpl11	oxysterol binding protein-like 11	protein_coding	1.84217	3.94913	7.84348e-05	0.00127379	394	316	235	357	752	782	1410	8.89933	8.61647	8.50076	8.77172	9.64616	9.17693	9.75579
ENSMUSG00000030061	22200	Uba3	ubiquitin-like modifier activating enzyme 3	protein_coding	1.99774	3.94867	7.85879e-05	0.00127492	302	495	360	372	952	1023	1833	8.53836	9.23046	9.0813	8.82778	9.97682	9.54968	10.1245
ENSMUSG00000030347	28040	D6Wsu163e	DNA segment, Chr 6, Wayne State University 163, expressed	protein_coding	2.08317	3.94792	7.8833e-05	0.00127822	131	120	87	140	310	293	628	7.45139	7.35822	7.22197	7.54089	8.43031	7.85966	8.63997
ENSMUSG00000001741	16170	Il16	interleukin 16	protein_coding	2.51261	3.94637	7.93453e-05	0.00128585	146	84	118	136	529	372	515	7.58739	6.92939	7.59998	7.50451	9.15763	8.17154	8.37326
ENSMUSG00000082189		Gm4784	predicted gene 4784	processed_pseudogene	10.9976	3.94266	8.05819e-05	0.00130313	4	1	2	0	32	18	42	4.52938	4.11081	4.3545	3.67762	5.79876	5.06329	5.55802
ENSMUSG00000039230	108903	Tbcd	tubulin-specific chaperone d	protein_coding	1.53404	3.94234	8.06915e-05	0.00130421	964	819	611	757	1444	2085	2382	10.1446	9.93279	9.81673	9.81173	10.5654	10.5519	10.4949
ENSMUSG00000074746	107368	Pdzd8	PDZ domain containing 8	protein_coding	1.63044	3.94131	8.10392e-05	0.00130859	217	265	188	245	435	575	841	8.09841	8.37991	8.20314	8.2654	8.88895	8.75553	9.03834
ENSMUSG00000071253	73132	Slc25a16	solute carrier family 25 (mitochondrial carrier, Graves disease autoantigen), member 16	protein_coding	1.99332	3.94125	8.10593e-05	0.00130859	166	190	161	178	334	496	956	7.75068	7.94118	7.9994	7.84693	8.53045	8.55544	9.21496
ENSMUSG00000034595	76448	Ppp1r18	protein phosphatase 1, regulatory subunit 18	protein_coding	2.46295	3.94115	8.10903e-05	0.00130859	784	429	509	735	2660	2046	2198	9.85379	9.03323	9.56128	9.77039	11.4357	10.5252	10.3811
ENSMUSG00000022620	11883	Arsa	arylsulfatase A	protein_coding	2.04973	3.94038	8.13522e-05	0.00131213	386	341	247	466	1080	890	1546	8.8713	8.71961	8.56781	9.13674	10.1545	9.35596	9.88492
ENSMUSG00000035372	72056	1810055G02Rik	RIKEN cDNA 1810055G02 gene	protein_coding	2.3495	3.93891	8.18514e-05	0.00131948	72	85	74	156	273	332	517	6.73743	6.94323	7.02773	7.6778	8.26084	8.02208	8.37844
ENSMUSG00000052397	22350	Ezr	ezrin	protein_coding	1.89244	3.93841	8.20222e-05	0.00132154	2569	1723	1454	1546	3492	6882	6797	11.5383	10.986	11.0438	10.821	11.8252	12.2576	11.9911
ENSMUSG00000046688	211550	Tifa	TRAF-interacting protein with forkhead-associated domain	protein_coding	3.83432	3.93814	8.21173e-05	0.00132238	125	91	66	134	916	320	445	7.39314	7.02356	6.89344	7.48597	9.92262	7.97404	8.17922
ENSMUSG00000035208	276950	Slfn8	schlafen 8	protein_coding	3.82781	3.93791	8.21949e-05	0.00132293	66	29	38	78	422	185	277	6.63961	5.81754	6.28542	6.83469	8.84751	7.28059	7.56666
ENSMUSG00000009907	20479	Vps4b	vacuolar protein sorting 4B	protein_coding	1.52584	3.93736	8.2383e-05	0.00132526	1234	1024	931	988	2009	2577	3225	10.4937	10.2476	10.4104	10.1864	11.035	10.8529	10.9254
ENSMUSG00000106831		Ube2n-ps1	ubiquitin-conjugating enzyme E2N, pseudogene 1	processed_pseudogene	2.49769	3.93457	8.33454e-05	0.00133794	333	140	126	149	540	798	942	8.67036	7.55035	7.68322	7.61951	9.18604	9.20489	9.19458
ENSMUSG00000000787	13205	Ddx3x	DEAD/H (Asp-Glu-Ala-Asp/His) box polypeptide 3, X-linked	protein_coding	1.63023	3.93392	8.35716e-05	0.00134086	2730	2448	2241	2359	5253	5568	8750	11.6253	11.4873	11.6618	11.4236	12.4108	11.9537	12.3534
ENSMUSG00000003228	14773	Grk5	G protein-coupled receptor kinase 5	protein_coding	2.27407	3.9309	8.46275e-05	0.00135639	175	129	83	177	484	391	633	7.81849	7.44789	7.16499	7.83966	9.03523	8.23743	8.65071
ENSMUSG00000029428	13852	Stx2	syntaxin 2	protein_coding	2.09361	3.93073	8.4689e-05	0.00135666	255	194	210	308	670	598	1227	8.31185	7.96829	8.35014	8.5717	9.48513	8.80892	9.56149
ENSMUSG00000087589		D430040D24Rik	RIKEN cDNA D430040D24 gene	processed_transcript	2.29252	3.9296	8.50864e-05	0.00136232	22	28	21	26	66	102	105	5.56648	5.78581	5.71705	5.71331	6.52211	6.5862	6.4293
ENSMUSG00000030058	54161	Copg1	coatomer protein complex, subunit gamma 1	protein_coding	1.52836	3.92926	8.52087e-05	0.00136356	1520	1415	1031	1559	2753	3363	4075	10.7897	10.7058	10.5549	10.8329	11.4848	11.2323	11.259
ENSMUSG00000027475	16569	Kif3b	kinesin family member 3B	protein_coding	1.88701	3.92841	8.55106e-05	0.00136768	389	308	245	260	809	776	1140	8.88187	8.58184	8.55685	8.34446	9.74837	9.1663	9.45904
ENSMUSG00000083557		Gm6877	predicted pseudogene 6877	processed_pseudogene	28.987	3.92749	8.58362e-05	0.00137217	0	1	0	1	16	15	43	3.67762	4.11081	3.67762	4.10919	5.23896	4.95009	5.57755
ENSMUSG00000042190	14747	Cmklr1	chemokine-like receptor 1	protein_coding	2.89393	3.92498	8.67357e-05	0.0013851	195	103	168	146	805	416	856	7.95861	7.17171	8.05506	7.59378	9.74143	8.31977	9.06264
ENSMUSG00000032487	19225	Ptgs2	prostaglandin-endoperoxide synthase 2	protein_coding	17.6396	3.92405	8.70732e-05	0.00138836	30	84	42	120	3535	797	279	5.83699	6.92939	6.39035	7.34895	11.8427	9.20316	7.57573
ENSMUSG00000033355	67775	Rtp4	receptor transporter protein 4	protein_coding	4.19489	3.92404	8.70752e-05	0.00138836	339	89	173	178	1787	647	1136	8.69456	6.99729	8.09354	7.84693	10.8683	8.91646	9.45415
ENSMUSG00000056290	60361	Ms4a4b	membrane-spanning 4-domains, subfamily A, member 4B	protein_coding	20.062	3.9188	8.89918e-05	0.00141523	7	4	2	0	204	18	21	4.79285	4.5346	4.3545	3.67762	7.87884	5.06329	5.05096
ENSMUSG00000118036		Gm6386	predicted gene 6386	processed_pseudogene	42.0772	3.91713	8.96101e-05	0.00142263	1	0	0	0	7	14	49	4.10811	3.67762	3.67762	3.67762	4.7375	4.90942	5.68871
ENSMUSG00000082516		Gm13342	predicted gene 13342	processed_pseudogene	2.77333	3.91698	8.96648e-05	0.00142263	19	12	15	16	45	68	104	5.44789	5.1227	5.43727	5.32019	6.1225	6.15845	6.41907
ENSMUSG00000048218	105827	Amigo2	adhesion molecule with Ig like domain 2	protein_coding	2.84841	3.91697	8.96679e-05	0.00142263	37	61	60	53	250	149	324	6.03483	6.56632	6.7836	6.40607	8.14444	7.02005	7.76595
ENSMUSG00000028186	22262	Uox	urate oxidase	protein_coding	14.3025	3.9169	8.96962e-05	0.00142263	444	17	78	213	3910	2523	6212	9.06318	5.37144	7.09038	8.08063	11.9872	10.8228	11.8621
ENSMUSG00000038201	16495	Kcna7	potassium voltage-gated channel, shaker-related subfamily, member 7	protein_coding	5.22891	3.91667	8.97822e-05	0.00142263	15	82	60	60	254	188	1098	5.26916	6.90129	6.7836	6.53995	8.16537	7.30029	9.40686
ENSMUSG00000054203	226695	Ifi205	interferon activated gene 205	protein_coding	5.91084	3.91625	8.99367e-05	0.00142361	103	57	146	161	1682	200	1163	7.15654	6.49229	7.87233	7.71803	10.7821	7.37647	9.48684
ENSMUSG00000027995	24088	Tlr2	toll-like receptor 2	protein_coding	5.24149	3.9136	9.09284e-05	0.00143708	193	70	205	162	2175	573	725	7.9452	6.71978	8.31802	7.72594	11.1482	8.7508	8.83512
ENSMUSG00000057191	382062	AB124611	cDNA sequence AB124611	protein_coding	5.24314	3.91319	9.10866e-05	0.0014381	162	95	143	183	2084	441	573	7.71947	7.07469	7.8455	7.88274	11.0873	8.39764	8.51631
ENSMUSG00000041712	66622	Ubr7	ubiquitin protein ligase E3 component n-recognin 7 (putative)	protein_coding	1.77982	3.91217	9.14692e-05	0.0014434	399	461	256	315	751	971	1413	8.91658	9.13223	8.61613	8.60203	9.6443	9.477	9.75877
ENSMUSG00000038187	68815	Btbd10	BTB (POZ) domain containing 10	protein_coding	1.65179	3.912	9.15362e-05	0.00144371	249	182	155	207	382	545	686	8.28018	7.88538	7.94991	8.04317	8.71197	8.68278	8.75981
ENSMUSG00000046556	79233	Zfp319	zinc finger protein 319	protein_coding	1.64635	3.91158	9.16945e-05	0.00144546	181	214	182	192	400	490	671	7.86198	8.09665	8.1603	7.94502	8.77455	8.53904	8.72976
ENSMUSG00000020300	67579	Cpeb4	cytoplasmic polyadenylation element binding protein 4	protein_coding	1.67903	3.91095	9.19347e-05	0.00144616	336	289	272	329	634	721	1198	8.68251	8.49609	8.69822	8.66084	9.40832	9.06502	9.52814
ENSMUSG00000033544	72713	Angptl1	angiopoietin-like 1	protein_coding	3.76088	3.91091	9.19483e-05	0.00144616	39	22	38	29	134	89	409	6.08635	5.57693	6.28542	5.81072	7.34735	6.43791	8.06819
ENSMUSG00000035441	338367	Myo1d	myosin ID	protein_coding	1.7686	3.91086	9.1969e-05	0.00144616	273	370	200	292	634	753	1056	8.40286	8.83068	8.28518	8.49986	9.40832	9.12481	9.35271
ENSMUSG00000026875	22029	Traf1	TNF receptor-associated factor 1	protein_coding	3.96476	3.9105	9.21064e-05	0.00144749	122	69	71	111	872	307	376	7.3631	6.70353	6.97886	7.25336	9.8535	7.9201	7.95828
ENSMUSG00000029380	14825	Cxcl1	chemokine (C-X-C motif) ligand 1	protein_coding	39.7029	3.9087	9.27956e-05	0.00145757	12	8	28	49	3241	102	250	5.11432	4.87298	5.98102	6.3233	11.7183	6.5862	7.43822
ENSMUSG00000044350	210808	Lacc1	laccase domain containing 1	protein_coding	2.31378	3.90829	9.29507e-05	0.00145926	114	177	114	144	481	336	711	7.27975	7.84936	7.55648	7.57637	9.02669	8.03775	8.80853
ENSMUSG00000030047	232201	Arhgap25	Rho GTPase activating protein 25	protein_coding	2.58496	3.90779	9.31461e-05	0.00146158	136	102	58	112	450	394	344	7.49817	7.15994	6.74499	7.26431	8.93533	8.24756	7.84301
ENSMUSG00000031103	56501	Elf4	E74-like factor 4 (ets domain transcription factor)	protein_coding	1.65979	3.90651	9.36376e-05	0.00146728	293	270	226	277	627	676	820	8.49766	8.4049	8.44833	8.4291	9.3929	8.97652	9.00361
ENSMUSG00000098678	223645	Mroh6	maestro heat-like repeat family member 6	protein_coding	9.25913	3.90648	9.36489e-05	0.00146728	10	2	3	0	21	61	102	4.9975	4.28798	4.50295	3.67762	5.44277	6.05088	6.39839
ENSMUSG00000029196	231151	Tada2b	transcriptional adaptor 2B	protein_coding	1.75812	3.90647	9.36529e-05	0.00146728	147	166	142	192	299	453	683	7.59601	7.7668	7.83645	7.94502	8.38198	8.43358	8.75385
ENSMUSG00000023132	14938	Gzma	granzyme A	protein_coding	16.7125	3.90397	9.46284e-05	0.00148029	9	0	2	8	234	21	46	4.93383	3.67762	4.3545	4.86873	8.05752	5.16567	5.63435
ENSMUSG00000039357	73068	Fut11	fucosyltransferase 11	protein_coding	1.81224	3.90121	9.5713e-05	0.00149589	210	236	196	246	561	524	873	8.05539	8.22574	8.25835	8.2708	9.23875	8.62958	9.0897
ENSMUSG00000022853	74147	Ehhadh	enoyl-Coenzyme A, hydratase/3-hydroxyacyl Coenzyme A dehydrogenase	protein_coding	2.68148	3.90118	9.57231e-05	0.00149589	48	59	30	72	149	158	399	6.29654	6.5298	6.04765	6.74317	7.47904	7.08981	8.03577
ENSMUSG00000108799		Glud-ps	glutamate dehydrogenase, pseudogene	processed_pseudogene	4.84004	3.90055	9.59761e-05	0.00149831	4	19	4	18	62	65	142	4.52938	5.45783	4.62649	5.40958	6.45442	6.1134	6.76279
ENSMUSG00000029474	80751	Rnf34	ring finger protein 34	protein_coding	2.0559	3.89989	9.62366e-05	0.00150161	211	286	135	194	624	612	766	8.06161	8.48207	7.77142	7.9585	9.38624	8.84047	8.91026
ENSMUSG00000037759	19217	Ptger2	prostaglandin E receptor 2 (subtype EP2)	protein_coding	5.38002	3.89901	9.65879e-05	0.00150632	8	9	4	11	93	52	39	4.86588	4.94129	4.62649	5.06075	6.90911	5.8985	5.49754
ENSMUSG00000030876	59052	Mettl9	methyltransferase like 9	protein_coding	1.56332	3.89845	9.68093e-05	0.00150825	1160	1099	973	954	1914	2542	3713	10.4061	10.3475	10.4729	10.137	10.966	10.8334	11.1262
ENSMUSG00000029462	56433	Vps29	VPS29 retromer complex component	protein_coding	1.69612	3.89794	9.70145e-05	0.00151062	686	709	684	623	1509	1648	2500	9.66675	9.73048	9.97524	9.53934	10.6279	10.219	10.5635
ENSMUSG00000032358	208994	Fam83b	family with sequence similarity 83, member B	protein_coding	2.8765	3.8978	9.70689e-05	0.00151062	39	38	30	34	68	152	319	6.08635	6.07317	6.04765	5.95844	6.55476	7.04369	7.74602
ENSMUSG00000000901	17385	Mmp11	matrix metallopeptidase 11	protein_coding	2.97538	3.8977	9.71094e-05	0.00151062	381	100	143	227	872	890	1259	8.85349	7.1361	7.8455	8.1644	9.8535	9.35596	9.59741
ENSMUSG00000032688	240354	Malt1	MALT1 paracaspase	protein_coding	2.13965	3.89621	9.7711e-05	0.00151921	150	191	129	159	562	441	562	7.62157	7.94801	7.71323	7.70207	9.24121	8.39764	8.49025
ENSMUSG00000036676	237500	Tmtc3	transmembrane and tetratricopeptide repeat containing 3	protein_coding	1.83825	3.896	9.77931e-05	0.00151971	91	105	77	88	166	274	399	7.00868	7.19497	7.07498	6.97512	7.61494	7.77333	8.03577
ENSMUSG00000029840	14489	Mtpn	myotrophin	protein_coding	1.67684	3.89586	9.78505e-05	0.00151983	894	999	891	1078	2256	2290	3318	10.0384	10.2127	10.3482	10.3096	11.2004	10.685	10.9659
ENSMUSG00000019998	53331	Stx7	syntaxin 7	protein_coding	1.82676	3.8952	9.81179e-05	0.00152321	675	695	545	649	1785	1501	2291	9.64416	9.70257	9.65669	9.59637	10.8667	10.0872	10.4398
ENSMUSG00000028719	66588	Cmpk1	cytidine monophosphate (UMP-CMP) kinase 1	protein_coding	1.6009	3.89479	9.82846e-05	0.00152503	1378	1060	1115	1116	2342	2949	3932	10.6503	10.2964	10.6661	10.3586	11.2538	11.0449	11.208
ENSMUSG00000058818	18733	Pirb	paired Ig-like receptor B	protein_coding	4.5584	3.89186	9.94781e-05	0.00154121	869	224	480	484	5594	1740	2623	9.99844	8.15677	9.47955	9.18903	12.5012	10.2958	10.6317
ENSMUSG00000106755		Tpi-rs11	triosephosphate isomerase related sequence 11	processed_pseudogene	1.98836	3.89169	9.95475e-05	0.0015415	198	221	226	231	580	532	1053	7.97849	8.13899	8.44833	8.18746	9.28484	8.65008	9.34876
ENSMUSG00000039232	74732	Stx11	syntaxin 11	protein_coding	3.60321	3.89101	9.9827e-05	0.0015448	146	101	86	115	925	391	392	7.58739	7.14807	7.20794	7.29664	9.93636	8.23743	8.01262
ENSMUSG00000089669	69583	Tnfsf13	tumor necrosis factor (ligand) superfamily, member 13	protein_coding	4.45875	3.88929	0.000100539	0.00155137	32	10	5	22	123	79	152	5.89661	5.00528	4.73396	5.57068	7.2424	6.31191	6.84076
ENSMUSG00000002204	16541	Napsa	napsin A aspartic peptidase	protein_coding	4.39545	3.8878	0.000101158	0.00155935	124	81	53	90	928	226	433	7.3832	6.88703	6.64355	7.0016	9.94092	7.52878	8.14316
ENSMUSG00000035901	19347	Dennd5a	DENN/MADD domain containing 5A	protein_coding	2.05151	3.88663	0.000101645	0.00156529	433	541	526	656	1597	1327	2471	9.0287	9.35353	9.60712	9.61135	10.7084	9.91388	10.5469
ENSMUSG00000025355	58223	Mmp19	matrix metallopeptidase 19	protein_coding	3.63	3.88614	0.000101852	0.00156768	248	145	165	424	1787	693	1475	8.27484	7.59459	8.03147	9.0068	10.8683	9.01059	9.81895
ENSMUSG00000064373	20363	Selenop	selenoprotein P	protein_coding	2.16336	3.88444	0.000102568	0.00157633	8425	5038	7652	8054	21509	19008	37688	13.2432	12.522	13.4254	13.1857	14.4394	13.7185	14.4547
ENSMUSG00000090389		Cdv3-ps	Cdv3 retrotransposed pseudogene	processed_pseudogene	2.28021	3.88373	0.000102866	0.00157911	40	34	24	42	97	105	192	6.11138	5.9656	5.83676	6.16518	6.95835	6.61829	7.11558
ENSMUSG00000041797	217262	Abca9	ATP-binding cassette, sub-family A (ABC1), member 9	protein_coding	3.88319	3.88252	0.00010338	0.00158562	21	56	84	73	261	233	704	5.5282	6.47315	7.17945	6.75884	8.20128	7.56715	8.79506
ENSMUSG00000016498	58205	Pdcd1lg2	programmed cell death 1 ligand 2	protein_coding	17.8352	3.88224	0.000103498	0.00158585	6	1	2	1	137	14	19	4.71362	4.11081	4.3545	4.10919	7.37468	4.90942	4.98827
ENSMUSG00000029407	56041	Uso1	USO1 vesicle docking factor	protein_coding	1.56194	3.88202	0.000103594	0.00158652	1191	1239	1109	1242	2437	2711	4028	10.4435	10.5173	10.6584	10.5101	11.3106	10.9251	11.2424
ENSMUSG00000046861	76608	Hectd3	HECT domain E3 ubiquitin protein ligase 3	protein_coding	1.43647	3.88187	0.000103655	0.00158666	826	769	580	787	1191	1803	2275	9.92708	9.84433	9.74377	9.86625	10.2927	10.3461	10.4298
ENSMUSG00000025485	101489	Ric8a	RIC8 guanine nucleotide exchange factor A	protein_coding	1.52907	3.88102	0.00010402	0.00159046	976	851	639	801	1571	1943	2581	10.162	9.98668	9.8796	9.89101	10.6851	10.4519	10.6087
ENSMUSG00000057465	20209	Saa2	serum amyloid A 2	protein_coding	7.7844	3.87843	0.000105133	0.00160288	47	20	15	75	837	95	258	6.27473	5.49882	5.43727	6.78967	9.79604	6.50833	7.4775
ENSMUSG00000025366	23943	Esyt1	extended synaptotagmin-like protein 1	protein_coding	1.95295	3.87792	0.000105354	0.00160339	1073	944	967	1371	3131	2599	4521	10.2959	10.1328	10.4641	10.6503	11.6689	10.865	11.4073
ENSMUSG00000015652	70358	Steap1	six transmembrane epithelial antigen of the prostate 1	protein_coding	3.32541	3.87763	0.000105479	0.00160339	80	44	35	51	351	217	194	6.85806	6.21992	6.20107	6.36531	8.59739	7.47787	7.12802
ENSMUSG00000023169	105727	Slc38a1	solute carrier family 38, member 1	protein_coding	3.02443	3.87702	0.000105742	0.00160657	48	57	31	37	252	169	161	6.29654	6.49229	6.07977	6.03975	8.15494	7.17065	6.90742
ENSMUSG00000024730	64381	Ms4a8a	membrane-spanning 4-domains, subfamily A, member 8A	protein_coding	7.02997	3.87551	0.0001064	0.00161417	110	25	59	44	1192	213	257	7.23617	5.68565	6.76443	6.21226	10.2939	7.45465	7.47264
ENSMUSG00000059237		Ppp1r2-ps4	protein phosphatase 1, regulatory (inhibitor) subunit 2, pseudogene 4	processed_pseudogene	5.0929	3.87395	0.000107084	0.00162214	11	11	5	1	47	47	80	5.0575	5.06559	4.73396	4.10919	6.16601	5.80557	6.14757
ENSMUSG00000001227	20359	Sema6b	sema domain, transmembrane domain (TM), and cytoplasmic domain, (semaphorin) 6B	protein_coding	2.43744	3.8725	0.000107726	0.00163106	266	194	216	267	1056	638	942	8.36815	7.96829	8.38775	8.37992	10.1228	8.8973	9.19458
ENSMUSG00000114380		Gm47942	predicted gene, 47942	processed_pseudogene	2.27607	3.87106	0.000108363	0.00163908	32	45	29	32	88	111	195	5.89661	6.24291	6.01475	5.90133	6.84503	6.68033	7.13419
ENSMUSG00000074896	15959	Ifit3	interferon-induced protein with tetratricopeptide repeats 3	protein_coding	3.59103	3.86998	0.000108843	0.00164473	515	137	301	265	1985	917	2202	9.26785	7.52312	8.83603	8.36987	11.0179	9.39745	10.3837
ENSMUSG00000053716	235584	Dusp7	dual specificity phosphatase 7	protein_coding	1.7223	3.86366	0.0001117	0.00168126	1388	968	784	965	2170	3209	3182	10.6606	10.1682	10.1675	10.1532	11.145	11.1654	10.9063
ENSMUSG00000020078	30930	Vps26a	VPS26 retromer complex component A	protein_coding	1.47742	3.86289	0.000112052	0.00168573	1314	1130	1037	1163	2215	2849	3295	10.5828	10.3869	10.5632	10.417	11.1742	10.9958	10.956
ENSMUSG00000026837	12831	Col5a1	collagen, type V, alpha 1	protein_coding	2.31498	3.86269	0.000112144	0.00168629	2939	1316	1956	2806	4988	8072	13684	11.7309	10.6028	11.4672	11.6718	12.3365	12.4865	12.996
ENSMUSG00000022307	170719	Oxr1	oxidation resistance 1	protein_coding	1.80355	3.86138	0.00011275	0.00169264	333	523	349	419	854	1089	1710	8.67036	9.30662	9.03863	8.99052	9.82424	9.63693	10.0267
ENSMUSG00000002900	16777	Lamb1	laminin B1	protein_coding	1.94837	3.86046	0.000113175	0.00169707	1117	1039	617	1168	2795	2427	3869	10.3527	10.2681	9.83044	10.423	11.5065	10.7676	11.1849
ENSMUSG00000047810	78317	Ccdc88b	coiled-coil domain containing 88B	protein_coding	4.41968	3.8597	0.000113527	0.00169874	282	99	121	166	1785	630	637	8.44629	7.12403	7.63177	7.75716	10.8667	8.88005	8.65923
ENSMUSG00000032431	56693	Crtap	cartilage associated protein	protein_coding	1.6878	3.85945	0.000113641	0.00169962	1404	939	823	998	2085	3145	3356	10.6769	10.1253	10.236	10.2006	11.088	11.1367	10.9821
ENSMUSG00000023913	27226	Pla2g7	phospholipase A2, group VII (platelet-activating factor acetylhydrolase, plasma)	protein_coding	5.00846	3.85767	0.000114475	0.00171043	765	326	389	494	6602	1603	1704	9.81937	8.65862	9.1881	9.21728	12.7392	10.18	10.0217
ENSMUSG00000034987	15466	Hrh2	histamine receptor H2	protein_coding	6.74251	3.85723	0.000114677	0.00171253	13	19	5	9	201	50	60	5.16834	5.45783	4.73396	4.93682	7.85968	5.86212	5.87039
ENSMUSG00000024691	107373	Fam111a	family with sequence similarity 111, member A	protein_coding	2.16967	3.85526	0.000115608	0.00172399	307	196	219	237	868	704	854	8.56049	7.98165	8.40619	8.22138	9.84705	9.03222	9.05942
ENSMUSG00000029561	23962	Oasl2	2'-5' oligoadenylate synthetase-like 2	protein_coding	3.50649	3.85504	0.000115711	0.00172469	510	205	300	320	2532	954	1651	9.25435	8.0403	8.83149	8.62331	11.3652	9.45243	9.97727
ENSMUSG00000078789	116905	Dph1	diphthamide biosynthesis 1	protein_coding	2.11367	3.85464	0.000115899	0.00172666	77	58	31	57	138	200	235	6.81403	6.51117	6.07977	6.48415	7.38367	7.37647	7.36153
ENSMUSG00000005362	58799	Crbn	cereblon	protein_coding	2.11964	3.85389	0.000116256	0.00173113	188	290	144	223	562	541	1100	7.91111	8.50073	7.8545	8.14096	9.24121	8.6728	9.40939
ENSMUSG00000049516	101685	Spty2d1	SPT2 chromatin protein domain containing 1	protein_coding	1.60103	3.84933	0.000118443	0.00176113	370	315	246	294	643	766	970	8.81353	8.61219	8.56234	8.50904	9.42791	9.1484	9.23505
ENSMUSG00000027285	66296	Haus2	HAUS augmin-like complex, subunit 2	protein_coding	2.06997	3.84673	0.000119705	0.00177645	103	181	136	118	346	408	634	7.15654	7.87825	7.78089	7.32826	8.57802	8.29393	8.65284
ENSMUSG00000033278	19274	Ptprm	protein tyrosine phosphatase, receptor type, M	protein_coding	2.41836	3.84591	0.000120106	0.00178055	88	136	121	159	378	331	827	6.96917	7.51393	7.63177	7.70207	8.69769	8.01814	9.01528
ENSMUSG00000017697	11486	Ada	adenosine deaminase	protein_coding	3.14948	3.84533	0.00012039	0.00178316	262	77	81	91	539	713	647	8.34793	6.82848	7.13561	7.01466	9.18348	9.04968	8.68034
ENSMUSG00000074361	319430	C5ar2	complement component 5a receptor 2	protein_coding	5.02061	3.8448	0.00012065	0.00178535	12	3	4	18	76	72	63	5.11432	4.42245	4.62649	5.40958	6.67818	6.21627	5.91584
ENSMUSG00000117804		Gm6252	predicted gene 6252	processed_pseudogene	2.15572	3.84478	0.000120663	0.00178535	159	248	129	152	515	451	831	7.69562	8.29155	7.71323	7.64478	9.12065	8.42765	9.0219
ENSMUSG00000032489	16578	Kif9	kinesin family member 9	protein_coding	1.98926	3.84358	0.000121253	0.00179224	47	39	33	37	92	127	164	6.27473	6.09876	6.14178	6.03975	6.89652	6.83347	6.92896
ENSMUSG00000070003	76900	Ssbp4	single stranded DNA binding protein 4	protein_coding	1.95241	3.84349	0.000121295	0.00179224	1157	660	686	960	2455	2642	2907	10.4025	9.63034	9.97934	10.1459	11.3211	10.8884	10.7777
ENSMUSG00000044645		Gm7334	predicted gene 7334	processed_pseudogene	2.40432	3.84325	0.000121415	0.00179314	51	62	24	41	103	169	265	6.35997	6.58423	5.83676	6.14101	7.02913	7.17065	7.511
ENSMUSG00000027615	12807	Hps3	HPS3, biogenesis of lysosomal organelles complex 2 subunit 1	protein_coding	1.9677	3.8421	0.000121986	0.00179983	100	156	99	125	345	354	428	7.121	7.68737	7.38039	7.39941	8.57412	8.1062	8.12786
ENSMUSG00000024675	64380	Ms4a4c	membrane-spanning 4-domains, subfamily A, member 4C	protein_coding	13.4157	3.84017	0.000122951	0.00181171	81	27	41	26	1672	179	493	6.87244	5.75328	6.36486	5.71331	10.7737	7.24035	8.31505
ENSMUSG00000078616	434219	Trim30c	tripartite motif-containing 30C	protein_coding	35.2608	3.83948	0.000123294	0.0018139	0	0	0	2	39	11	28	3.67762	3.67762	3.67762	4.28573	5.98281	4.77623	5.24565
ENSMUSG00000038503	67943	Mesd	mesoderm development LRP chaperone	protein_coding	1.64814	3.83742	0.000124333	0.00182655	458	542	394	496	1091	1127	1535	9.1059	9.35609	9.20574	9.22286	10.1688	9.68488	9.8749
ENSMUSG00000019832	67844	Rab32	RAB32, member RAS oncogene family	protein_coding	2.08813	3.83665	0.000124723	0.00183141	369	322	329	300	1158	886	1193	8.80985	8.64191	8.95764	8.53623	10.253	9.34971	9.52231
ENSMUSG00000093798		Gm8355	predicted pseudogene 8355	processed_pseudogene	1.71828	3.83641	0.000124846	0.00183234	198	194	156	206	443	580	526	7.97849	7.96829	7.95828	8.03683	8.91387	8.76731	8.40151
ENSMUSG00000018999	58246	Slc35b4	solute carrier family 35, member B4	protein_coding	1.54564	3.83579	0.000125163	0.00183522	349	283	276	329	549	778	1052	8.73403	8.46791	8.71803	8.66084	9.20886	9.16985	9.34744
ENSMUSG00000058396	11536	Gpr182	G protein-coupled receptor 182	protein_coding	2.348	3.83532	0.000125402	0.00183785	76	61	59	64	261	180	273	6.79904	6.56632	6.76443	6.61103	8.20128	7.24714	7.54835
ENSMUSG00000046546	224093	Fam43a	family with sequence similarity 43, member A	protein_coding	2.25331	3.83382	0.00012617	0.00184822	1564	722	690	785	2823	3649	3632	10.8303	9.75592	9.98752	9.86268	11.5207	11.3489	11.0948
ENSMUSG00000069049	26908	Eif2s3y	eukaryotic translation initiation factor 2, subunit 3, structural gene Y-linked	protein_coding	1.57167	3.83358	0.00012629	0.0018491	720	862	702	678	1330	1940	2548	9.73443	10.0048	10.0118	9.65743	10.4489	10.4498	10.5905
ENSMUSG00000082100		Glns-ps1	glutamine synthetase pseudogene 1	processed_pseudogene	2.67749	3.83271	0.000126737	0.00185299	115	95	65	114	384	212	661	7.29044	7.07469	6.87572	7.28594	8.71906	7.44879	8.70937
ENSMUSG00000020376	59044	Rnf130	ring finger protein 130	protein_coding	1.9925	3.83227	0.000126967	0.00185547	932	909	1010	1017	3109	2452	3618	10.097	10.0795	10.5258	10.2273	11.6588	10.7822	11.0893
ENSMUSG00000115946		Mirt2	myocardial infraction associated transcript 2	antisense	10.2475	3.83156	0.000127333	0.00185992	15	1	14	4	241	72	50	5.26916	4.11081	5.38378	4.53147	8.09619	6.21627	5.70633
ENSMUSG00000013707	69769	Tnfaip8l2	tumor necrosis factor, alpha-induced protein 8-like 2	protein_coding	3.14082	3.83096	0.000127644	0.00186281	260	131	231	206	1334	593	1019	8.33771	7.46707	8.47769	8.03683	10.4531	8.79748	9.30326
ENSMUSG00000081787		Gm13991	predicted gene 13991	processed_pseudogene	6.18342	3.82979	0.000128252	0.00187067	3	6	5	11	36	26	142	4.41788	4.71989	4.73396	5.06075	5.90706	5.31795	6.76279
ENSMUSG00000087370	621976	Tmem170b	transmembrane protein 170B	protein_coding	1.62046	3.82917	0.000128578	0.00187454	207	180	145	190	389	451	578	8.03655	7.87108	7.86344	7.93141	8.73663	8.42765	8.52801
ENSMUSG00000029234	21982	Tmem165	transmembrane protein 165	protein_coding	1.75317	3.82785	0.000129266	0.00188367	1084	711	713	699	1551	2400	3071	10.3103	9.73443	10.0337	9.70008	10.6669	10.7517	10.8558
ENSMUSG00000030966	20821	Trim21	tripartite motif-containing 21	protein_coding	2.64132	3.82432	0.000131132	0.00190814	109	86	64	64	365	204	428	7.22507	6.95694	6.85777	6.61103	8.65027	7.40099	8.12786
ENSMUSG00000030577	12483	Cd22	CD22 antigen	protein_coding	11.4217	3.82363	0.0001315	0.00191258	8	0	7	0	82	54	66	4.86588	3.67762	4.91713	3.67762	6.76409	5.93391	5.95977
ENSMUSG00000028559	100273	Osbpl9	oxysterol binding protein-like 9	protein_coding	1.55437	3.82284	0.000131923	0.0019162	1784	1851	1505	1838	3763	3963	5375	11.0177	11.0881	11.093	11.0674	11.9323	11.4668	11.6548
ENSMUSG00000031444	14058	F10	coagulation factor X	protein_coding	17.918	3.82282	0.000131932	0.0019162	63	24	16	37	1906	225	177	6.58801	5.65044	5.4885	6.03975	10.9601	7.52321	7.01868
ENSMUSG00000019143	70791	Hars2	histidyl-tRNA synthetase 2	protein_coding	1.61837	3.82282	0.000131936	0.0019162	252	292	186	262	467	614	904	8.2961	8.50997	8.189	8.35468	8.98615	8.84492	9.13776
ENSMUSG00000032577	102626	Mapkapk3	mitogen-activated protein kinase-activated protein kinase 3	protein_coding	1.46838	3.82269	0.000132005	0.00191629	1434	1350	1142	1453	2036	3492	4395	10.7069	10.639	10.7001	10.7328	11.0541	11.2861	11.3669
ENSMUSG00000020473	11568	Aebp1	AE binding protein 1	protein_coding	2.10013	3.82181	0.000132475	0.0019216	4814	2700	2947	4336	8405	9984	20911	12.4386	11.6275	12.0542	12.2957	13.0864	12.792	13.6062
ENSMUSG00000036894	74012	Rap2b	RAP2B, member of RAS oncogene family	protein_coding	1.68833	3.82079	0.000133025	0.00192825	550	621	556	559	1387	1463	1805	9.35897	9.54534	9.68463	9.38853	10.5083	10.0511	10.1028
ENSMUSG00000063767	381493	S100a7a	S100 calcium binding protein A7A	protein_coding	5.35183	3.82023	0.000133327	0.00192999	206	266	22	61	1258	903	1118	8.03021	8.38495	5.7582	6.55806	10.3701	9.37608	9.43194
ENSMUSG00000105928		Gm9256	predicted gene 9256	processed_pseudogene	5.64115	3.8194	0.000133775	0.00193557	5	5	2	3	28	21	55	4.6266	4.63238	4.3545	4.41971	5.68058	5.16567	5.79095
ENSMUSG00000029518	77407	Rab35	RAB35, member RAS oncogene family	protein_coding	1.42935	3.81676	0.000135213	0.00195269	1220	1080	931	1048	1898	2535	3063	10.4776	10.3228	10.4104	10.2697	10.9541	10.8295	10.8521
ENSMUSG00000020009	15979	Ifngr1	interferon gamma receptor 1	protein_coding	2.4152	3.81641	0.000135407	0.00195457	964	1144	1006	1210	4712	2442	4985	10.1446	10.4043	10.5201	10.4731	12.2548	10.7764	11.547
ENSMUSG00000021939	13030	Ctsb	cathepsin B	protein_coding	2.04554	3.81432	0.00013656	0.00196658	23191	12646	15870	20252	54457	47997	73930	14.7016	13.8459	14.4761	14.5136	15.7786	15.0531	15.426
ENSMUSG00000035354	78610	Uvrag	UV radiation resistance associated gene	protein_coding	1.67357	3.81164	0.000138045	0.00198451	442	520	414	444	1071	1093	1523	9.05697	9.29865	9.27421	9.07014	10.1427	9.64206	9.86388
ENSMUSG00000114217		Gm7054	predicted gene 7054	processed_pseudogene	4.22391	3.81131	0.000138234	0.00198602	8	5	4	4	23	37	51	4.86588	4.63238	4.62649	4.53147	5.51549	5.59685	5.7237
ENSMUSG00000025077	55947	Dclre1a	DNA cross-link repair 1A	protein_coding	2.18355	3.80845	0.00013984	0.00200721	59	54	45	37	96	193	255	6.51609	6.43405	6.46412	6.03975	6.9462	7.33253	7.46289
ENSMUSG00000042363	216551	Lgalsl	lectin, galactoside binding-like	protein_coding	1.81787	3.80803	0.000140078	0.00200969	2000	1361	1343	1475	2637	4703	7026	11.1806	10.6506	10.9307	10.7542	11.4233	11.7118	12.0386
ENSMUSG00000043259	71721	Fam13c	family with sequence similarity 13, member C	protein_coding	2.12531	3.80534	0.000141609	0.00203069	59	116	76	81	200	271	414	6.51609	7.31649	7.0594	6.8783	7.85324	7.75921	8.08414
ENSMUSG00000043702	211948	Pde12	phosphodiesterase 12	protein_coding	1.8092	3.8046	0.000142033	0.00203393	512	338	360	388	695	1261	1725	9.25977	8.70762	9.0813	8.88527	9.53616	9.84225	10.039
ENSMUSG00000033184	66676	Tmed7	transmembrane p24 trafficking protein 7	protein_coding	2.02956	3.8037	0.000142549	0.0020394	534	628	619	493	1677	1392	2596	9.31803	9.56097	9.83497	9.21448	10.7779	9.9811	10.617
ENSMUSG00000054640	20541	Slc8a1	solute carrier family 8 (sodium/calcium exchanger), member 1	protein_coding	2.60609	3.8028	0.000143071	0.00204592	75	68	100	83	379	239	386	6.78389	6.6871	7.39283	6.90665	8.70127	7.59924	7.99249
ENSMUSG00000001123	16859	Lgals9	lectin, galactose binding, soluble 9	protein_coding	2.23135	3.80215	0.000143446	0.00205033	966	422	708	710	2202	2221	3197	10.1475	9.01063	10.0238	9.72193	11.1658	10.6416	10.913
ENSMUSG00000001802	435965	Lrp3	low density lipoprotein receptor-related protein 3	protein_coding	2.48903	3.80162	0.000143755	0.00205347	92	90	86	129	411	236	522	7.02161	7.01049	7.20794	7.43853	8.81149	7.58329	8.3913
ENSMUSG00000085611		Ap3s1-ps1	adaptor-related protein complex 3, sigma 1 subunit, pseudogene 1	processed_pseudogene	3.7158	3.80154	0.0001438	0.00205347	11	20	12	8	81	48	95	5.0575	5.49882	5.26898	4.86873	6.75013	5.82469	6.32346
ENSMUSG00000024085	17158	Man2a1	mannosidase 2, alpha 1	protein_coding	2.08749	3.80128	0.00014395	0.00205465	1079	674	808	911	2984	2438	3063	10.3037	9.65967	10.21	10.072	11.6001	10.774	10.8521
ENSMUSG00000042759	171504	Apobr	apolipoprotein B receptor	protein_coding	3.53896	3.80046	0.00014443	0.00205959	159	129	130	110	1093	384	531	7.69562	7.44789	7.72309	7.24233	10.1714	8.2135	8.41417
ENSMUSG00000037860	383619	Aim2	absent in melanoma 2	protein_coding	2.4822	3.79942	0.000145037	0.00206536	83	37	46	57	213	222	214	6.90076	6.04707	6.48786	6.48415	7.93481	7.50638	7.24671
ENSMUSG00000089942	18725	Pira2	paired-Ig-like receptor A2	protein_coding	34.7857	3.79793	0.000145908	0.00207503	0	2	0	0	41	13	21	3.67762	4.28798	3.67762	3.67762	6.03101	4.86703	5.05096
ENSMUSG00000022667	57781	Cd200r1	CD200 receptor 1	protein_coding	3.84245	3.79791	0.000145919	0.00207503	17	14	20	19	136	52	121	5.36189	5.22876	5.67453	5.45189	7.36562	5.8985	6.58339
ENSMUSG00000070729		Gm12966	predicted gene 12966	processed_pseudogene	2.01117	3.79737	0.000146241	0.00207865	557	513	296	316	828	1716	1656	9.37652	9.27988	8.81319	8.60631	9.78089	10.2762	9.98152
ENSMUSG00000079014	628900	Serpina3i	serine (or cysteine) peptidase inhibitor, clade A, member 3I	protein_coding	2.51476	3.79509	0.000147592	0.00209687	56	53	45	77	258	189	217	6.45959	6.41408	6.46412	6.81984	8.186	7.30679	7.26369
ENSMUSG00000030208	13730	Emp1	epithelial membrane protein 1	protein_coding	1.7798	3.7913	0.000149863	0.00212717	2400	3457	2717	3194	6029	7414	12925	11.441	11.9815	11.9377	11.8573	12.6087	12.3644	12.9139
ENSMUSG00000021497	69672	Txndc15	thioredoxin domain containing 15	protein_coding	1.60525	3.79115	0.00014995	0.00212741	592	685	514	656	1308	1382	2099	9.46122	9.6823	9.57491	9.61135	10.4252	9.97096	10.3159
ENSMUSG00000038206	50753	Fbxo8	F-box protein 8	protein_coding	1.77657	3.79017	0.000150543	0.00213287	198	302	203	240	465	652	983	7.97849	8.55531	8.30497	8.23805	8.98026	8.92699	9.25347
ENSMUSG00000026107	109019	Nabp1	nucleic acid binding protein 1	protein_coding	2.06307	3.78984	0.000150744	0.00213473	456	359	300	339	1238	910	1357	9.09988	8.78955	8.83149	8.70143	10.3474	9.38681	9.70216
ENSMUSG00000018927	20305	Ccl6	chemokine (C-C motif) ligand 6	protein_coding	3.81288	3.78672	0.000152646	0.00216066	2831	733	2018	2724	16643	7364	11107	11.6773	9.77711	11.5118	11.6294	14.0699	12.3547	12.696
ENSMUSG00000027835	56426	Pdcd10	programmed cell death 10	protein_coding	1.94715	3.78501	0.000153702	0.0021746	145	164	129	183	468	389	578	7.57871	7.75126	7.71323	7.88274	8.98908	8.23063	8.52801
ENSMUSG00000037944	12775	Ccr7	chemokine (C-C motif) receptor 7	protein_coding	7.59888	3.78365	0.000154546	0.00218453	24	11	22	5	333	80	70	5.63968	5.06559	5.7582	4.62892	8.52641	6.32504	6.01617
ENSMUSG00000083465		Gm11652	predicted gene 11652	processed_pseudogene	3.89674	3.77954	0.000157117	0.00221474	19	7	4	15	36	89	94	5.44789	4.79955	4.62649	5.27283	5.90706	6.43791	6.31241
ENSMUSG00000085295		4930430E12Rik	RIKEN cDNA 4930430E12 gene	antisense	59.2493	3.77851	0.000157772	0.00222295	0	0	0	0	28	11	6	3.67762	3.67762	3.67762	3.67762	5.68058	4.77623	4.43114
ENSMUSG00000028121	29815	Bcar3	breast cancer anti-estrogen resistance 3	protein_coding	1.87746	3.77645	0.000159077	0.00223928	93	112	96	122	279	269	417	7.03442	7.27349	7.34241	7.36935	8.28971	7.74972	8.09362
ENSMUSG00000020437	246177	Myo1g	myosin IG	protein_coding	2.64822	3.77572	0.000159545	0.00224484	221	186	187	219	1079	539	798	8.12243	7.91355	8.19609	8.11713	10.1532	8.66778	8.96631
ENSMUSG00000036067	227659	Slc2a6	solute carrier family 2 (facilitated glucose transporter), member 6	protein_coding	6.28195	3.77503	0.00015999	0.00224947	45	44	22	42	683	90	160	6.23002	6.21992	5.7582	6.16518	9.51189	6.44989	6.90017
ENSMUSG00000023206	16169	Il15ra	interleukin 15 receptor, alpha chain	protein_coding	2.39746	3.77498	0.000160021	0.00224947	170	189	127	232	774	478	707	7.78121	7.93432	7.69329	8.19317	9.68647	8.50568	8.80085
ENSMUSG00000083367		Gm8806	predicted gene 8806	processed_pseudogene	3.21496	3.77382	0.000160766	0.00225891	26	53	11	50	114	172	269	5.70888	6.41408	5.20703	6.34446	7.15037	7.19192	7.52979
ENSMUSG00000040249	16971	Lrp1	low density lipoprotein receptor-related protein 1	protein_coding	2.10272	3.77335	0.00016107	0.00226214	5859	3534	4027	5832	16061	12372	19286	12.7208	12.0131	12.5023	12.7214	14.0186	13.1004	13.4898
ENSMUSG00000037072	93684	Selenof	selenoprotein F	protein_coding	1.64683	3.77322	0.000161151	0.00226224	2542	3135	2596	2822	6321	6509	9404	11.5232	11.8414	11.8724	11.68	12.6767	12.1776	12.4569
ENSMUSG00000028965	21942	Tnfrsf9	tumor necrosis factor receptor superfamily, member 9	protein_coding	7.65408	3.77215	0.000161849	0.002271	38	24	35	42	823	89	110	6.06084	5.65044	6.20107	6.16518	9.7724	6.43791	6.47932
ENSMUSG00000015149	64383	Sirt2	sirtuin 2	protein_coding	1.50928	3.77064	0.000162831	0.00228269	1124	1128	881	1233	1926	2465	3786	10.3615	10.3844	10.3322	10.4998	10.9749	10.7897	11.154
ENSMUSG00000015357	270166	Clpx	caseinolytic mitochondrial matrix peptidase chaperone subunit	protein_coding	1.69738	3.7705	0.000162922	0.00228292	936	1149	824	820	1972	2242	3621	10.103	10.4105	10.2377	9.92394	11.0085	10.655	11.0904
ENSMUSG00000031570	71910	Plpp5	phospholipid phosphatase 5	protein_coding	1.76751	3.76939	0.00016365	0.00229207	198	147	131	214	403	460	613	7.97849	7.61192	7.73289	8.08677	8.78472	8.45413	8.60729
ENSMUSG00000042426	218629	Dhx29	DEAH (Asp-Glu-Ala-His) box polypeptide 29	protein_coding	1.61381	3.76917	0.000163793	0.00229302	256	305	217	252	504	618	934	8.31706	8.56863	8.39392	8.30283	9.09092	8.85379	9.1828
ENSMUSG00000082226	279618	Gm715	predicted gene 715	processed_pseudogene	45.4779	3.76571	0.000166077	0.00232126	0	0	0	0	5	18	21	3.67762	3.67762	3.67762	3.67762	4.57893	5.06329	5.05096
ENSMUSG00000022575	69146	Gsdmd	gasdermin D	protein_coding	3.42481	3.76519	0.000166425	0.00232456	414	221	279	347	2471	892	1273	8.96712	8.13899	8.73271	8.73309	11.3304	9.35907	9.61284
ENSMUSG00000037335	15110	Hand1	heart and neural crest derivatives expressed 1	protein_coding	58.6782	3.76392	0.000167274	0.00233361	0	0	0	0	26	4	17	3.67762	3.67762	3.67762	3.67762	5.61712	4.35012	4.92156
ENSMUSG00000074417	18724,18729,18730,100038909	Gm14548	predicted gene 14548	protein_coding	74.9368	3.76387	0.000167301	0.00233361	0	0	0	0	38	2	17	3.67762	3.67762	3.67762	3.67762	5.95804	4.15528	4.92156
ENSMUSG00000074677	100038947	Sirpb1c	signal-regulatory protein beta 1C	protein_coding	24.1587	3.76265	0.000168121	0.00234398	19	3	2	3	467	50	99	5.44789	4.42245	4.3545	4.41971	8.98615	5.86212	6.36678
ENSMUSG00000079597	433016	Cstdc4	cystatin domain containing 4	protein_coding	19.0048	3.76191	0.000168619	0.00234985	33	53	26	107	3114	556	176	5.92543	6.41408	5.91086	7.20873	11.6611	8.70989	7.01197
ENSMUSG00000022901	12524	Cd86	CD86 antigen	protein_coding	3.02171	3.75812	0.000171198	0.00238146	77	59	66	70	434	216	259	6.81403	6.5298	6.89344	6.71128	8.8858	7.4721	7.48233
ENSMUSG00000037876	108829	Jmjd1c	jumonji domain containing 1C	protein_coding	1.48701	3.75747	0.000171639	0.00238651	488	476	377	468	884	1041	1345	9.1934	9.17639	9.14486	9.14264	9.87268	9.574	9.68973
ENSMUSG00000024164	12266	C3	complement component 3	protein_coding	3.80224	3.75612	0.000172571	0.00239838	8739	2268	3931	4720	34208	11377	40972	13.2958	11.3782	12.4677	12.4175	15.1082	12.9798	14.5751
ENSMUSG00000042396	67010	Rbm7	RNA binding motif protein 7	protein_coding	1.8107	3.75412	0.000173952	0.0024132	393	451	351	389	1035	893	1544	8.89586	9.10201	9.04648	8.88879	10.0945	9.36063	9.88311
ENSMUSG00000033538	12363	Casp4	caspase 4, apoptosis-related cysteine peptidase	protein_coding	3.69123	3.753	0.000174734	0.00242295	155	130	167	172	1317	321	904	7.66318	7.45751	8.04724	7.80275	10.435	7.9781	9.13776
ENSMUSG00000075000	641340	Nrbf2	nuclear receptor binding factor 2	protein_coding	2.30739	3.75266	0.00017497	0.00242513	69	128	122	102	336	317	552	6.68937	7.4382	7.64221	7.15088	8.53849	7.96177	8.46615
ENSMUSG00000021822	18792	Plau	plasminogen activator, urokinase	protein_coding	1.77076	3.75077	0.000176292	0.00244055	1298	896	879	848	2073	3401	3007	10.5654	10.0592	10.329	9.97114	11.0797	11.2484	10.8258
ENSMUSG00000072844		G530011O06Rik	RIKEN cDNA G530011O06 gene	processed_transcript	4.92039	3.7496	0.000177115	0.00244721	27	19	14	13	214	49	120	5.74212	5.45783	5.38378	5.17181	7.9409	5.84354	6.57425
ENSMUSG00000027611	19124	Procr	protein C receptor, endothelial	protein_coding	2.88516	3.74928	0.000177343	0.00244805	573	411	242	488	2496	1369	1488	9.41586	8.9744	8.54025	9.20039	11.3448	9.95767	9.83126
ENSMUSG00000019877	56442	Serinc1	serine incorporator 1	protein_coding	2.51412	3.74872	0.000177737	0.00245129	465	946	724	949	2739	1913	4910	9.1268	10.1358	10.0552	10.1296	11.4775	10.4299	11.5253
ENSMUSG00000026358	50778	Rgs1	regulator of G-protein signaling 1	protein_coding	8.09702	3.74761	0.000178529	0.00246088	10	7	10	6	195	43	28	4.9975	4.79955	5.14149	4.71614	7.82058	5.72612	5.24565
ENSMUSG00000079419	73656	Ms4a6c	membrane-spanning 4-domains, subfamily A, member 6C	protein_coding	4.76029	3.74726	0.000178779	0.00246149	469	139	373	333	4035	1027	1497	9.13861	7.54133	9.13015	8.67721	12.0323	9.55512	9.83972
ENSMUSG00000084067		Gm14269	predicted gene 14269	processed_pseudogene	2.66638	3.74714	0.000178862	0.00246149	19	54	36	44	126	142	240	5.44789	6.43405	6.22977	6.21226	7.2718	6.96331	7.38755
ENSMUSG00000056632	13512	Dsg3	desmoglein 3	protein_coding	1.84667	3.74649	0.000179328	0.00246656	2092	1474	1220	1593	3170	6447	4763	11.2448	10.7639	10.794	10.8636	11.6866	12.1639	11.4819
ENSMUSG00000028249	53378	Sdcbp	syndecan binding protein	protein_coding	2.2218	3.74575	0.000179858	0.00247275	1537	1164	1273	1705	5642	3774	5082	10.8055	10.4288	10.8545	10.9603	12.5134	11.397	11.5746
ENSMUSG00000097530		Kansl2-ps	KAT8 regulatory NSL complex subunit 2, pseudogene	processed_pseudogene	2.10943	3.74444	0.000180796	0.00248174	115	178	112	101	266	401	697	7.29044	7.85664	7.53422	7.13903	8.2264	8.27093	8.78145
ENSMUSG00000030263	16970	Lrmp	lymphoid-restricted membrane protein	protein_coding	2.39299	3.74439	0.000180836	0.00248174	140	115	116	89	489	334	456	7.53453	7.30586	7.5784	6.98842	9.04936	8.02994	8.2115
ENSMUSG00000117627		Tpi-rs10	triosephosphate isomerase related sequence 10	processed_pseudogene	3.62257	3.74358	0.000181414	0.00248661	9	20	6	18	47	59	137	4.93383	5.49882	4.82993	5.40958	6.16601	6.0185	6.72211
ENSMUSG00000083879		Gm14038	predicted gene 14038	processed_pseudogene	3.11989	3.74344	0.000181516	0.00248661	12	31	14	16	72	68	142	5.11432	5.87878	5.38378	5.32019	6.61783	6.15845	6.76279
ENSMUSG00000021036	20773	Sptlc2	serine palmitoyltransferase, long chain base subunit 2	protein_coding	1.86603	3.74252	0.000182187	0.0024947	1498	889	1116	982	2755	3599	3845	10.769	10.0482	10.6674	10.1778	11.4859	11.3292	11.1761
ENSMUSG00000031485	114863	Plpbp	pyridoxal phosphate binding protein	protein_coding	1.59409	3.7422	0.000182413	0.00249667	491	592	470	612	992	1301	2018	9.20187	9.47872	9.45025	9.51452	10.0347	9.88609	10.2603
ENSMUSG00000022808	69150	Snx4	sorting nexin 4	protein_coding	1.53522	3.74144	0.000182967	0.00250201	452	461	397	538	846	1080	1591	9.08775	9.13223	9.21622	9.33539	9.81104	9.62534	9.92523
ENSMUSG00000051615	76108	Rap2a	RAS related protein 2a	protein_coding	1.5848	3.74128	0.000183088	0.00250256	398	409	393	443	886	1011	1271	8.91315	8.96771	9.20222	9.06704	9.87585	9.53323	9.61065
ENSMUSG00000024277	212307	Mapre2	microtubule-associated protein, RP/EB family, member 2	protein_coding	1.7302	3.74033	0.000183781	0.00251091	885	579	759	768	1527	2121	2815	10.0241	9.44783	10.1218	9.83196	10.6448	10.5762	10.732
ENSMUSG00000031494	170786	Cd209a	CD209a antigen	protein_coding	2.2063	3.73847	0.000185145	0.00252842	73	59	62	71	137	199	421	6.75308	6.5298	6.82117	6.72732	7.37468	7.37028	8.10616
ENSMUSG00000044827	21897	Tlr1	toll-like receptor 1	protein_coding	4.86569	3.73835	0.000185233	0.00252849	78	11	59	32	453	218	327	6.82886	5.06559	6.76443	5.90133	8.94443	7.48362	7.77778
ENSMUSG00000020256	216188	Aldh1l2	aldehyde dehydrogenase 1 family, member L2	protein_coding	4.06541	3.73679	0.000186386	0.00254196	87	10	34	37	199	329	304	6.95575	5.00528	6.17175	6.03975	7.84677	8.01022	7.68451
ENSMUSG00000036461	13709	Elf1	E74-like factor 1	protein_coding	1.65885	3.73596	0.000186999	0.00254919	315	360	288	295	669	736	1170	8.59519	8.79334	8.77588	8.51361	9.48305	9.09336	9.4952
ENSMUSG00000029669	269831	Tspan12	tetraspanin 12	protein_coding	3.49202	3.73077	0.000190895	0.00259293	44	42	38	61	235	88	475	6.20711	6.17275	6.28542	6.55806	8.06311	6.42581	8.26561
ENSMUSG00000073139	236848	Tmem185a	transmembrane protein 185A	protein_coding	1.77464	3.73067	0.000190969	0.00259293	184	201	141	206	415	422	759	7.88324	8.01453	7.82734	8.03683	8.82469	8.33884	8.89771
ENSMUSG00000027322	20612	Siglec1	sialic acid binding Ig-like lectin 1, sialoadhesin	protein_coding	4.08404	3.72926	0.000192045	0.00260292	147	41	161	64	776	374	889	7.59601	6.14853	7.9994	6.61103	9.69008	8.17862	9.1147
ENSMUSG00000060131	241633	Atp8b4	ATPase, class I, type 8B, member 4	protein_coding	5.48866	3.72812	0.000192914	0.00261355	29	18	10	13	241	52	102	5.80613	5.41541	5.14149	5.17181	8.09619	5.8985	6.39839
ENSMUSG00000031963	73230	Bmper	BMP-binding endothelial regulator	protein_coding	2.97046	3.72789	0.000193088	0.00261476	42	56	85	51	256	169	452	6.16009	6.47315	7.19376	6.36531	8.17572	7.17065	8.19984
ENSMUSG00000046245	231805	Pilra	paired immunoglobin-like type 2 receptor alpha	protein_coding	14.4787	3.72698	0.000193786	0.00262188	35	11	32	20	1099	132	161	5.98126	5.06559	6.11113	5.49277	10.1791	6.87809	6.90742
ENSMUSG00000081603		Gm14681	predicted gene 14681	processed_pseudogene	1.45613	3.72679	0.000193931	0.00262269	1286	1387	1020	1171	2101	3259	3314	10.5523	10.6774	10.5397	10.4267	11.0989	11.1875	10.9642
ENSMUSG00000027433	24128	Xrn2	5'-3' exoribonuclease 2	protein_coding	1.42438	3.7266	0.000194082	0.00262357	775	705	628	691	1150	1806	1972	9.83759	9.72256	9.85523	9.68398	10.2432	10.3484	10.2277
ENSMUSG00000038147	12523	Cd84	CD84 antigen	protein_coding	3.45936	3.72399	0.000196098	0.00264732	233	68	162	170	1118	542	797	8.19217	6.6871	8.00749	7.78771	10.2033	8.6753	8.96459
ENSMUSG00000068349	625599	Gml	glycosylphosphatidylinositol anchored molecule like	protein_coding	6.40582	3.72255	0.00019722	0.00265742	26	1	6	7	89	71	148	5.70888	4.11081	4.82993	4.79554	6.85808	6.20205	6.81009
ENSMUSG00000034037	232237	Fgd5	FYVE, RhoGEF and PH domain containing 5	protein_coding	1.74989	3.72248	0.000197279	0.00265742	168	131	118	177	323	369	587	7.76603	7.46707	7.59998	7.83966	8.48542	8.16085	8.54881
ENSMUSG00000115247		Gm6201	predicted gene 6201	processed_pseudogene	27.4128	3.72182	0.000197789	0.00266312	0	0	2	0	25	17	22	3.67762	3.67762	4.3545	3.67762	5.58416	5.02689	5.08097
ENSMUSG00000068794	213945	Col28a1	collagen, type XXVIII, alpha 1	protein_coding	3.62775	3.72135	0.000198161	0.00266695	11	15	5	5	43	47	68	5.0575	5.27829	4.73396	4.62892	6.07754	5.80557	5.98827
ENSMUSG00000026478	226519	Lamc1	laminin, gamma 1	protein_coding	1.66045	3.72047	0.000198852	0.00267508	1658	1396	1447	1928	3210	3817	6269	10.9133	10.6866	11.0369	11.1355	11.7046	11.4132	11.8751
ENSMUSG00000026342	74150	Slc35f5	solute carrier family 35, member F5	protein_coding	1.67701	3.72012	0.000199126	0.00267758	632	576	653	676	1350	1534	2408	9.55228	9.4406	9.91004	9.6533	10.47	10.1179	10.5103
ENSMUSG00000049969	71801	Plekhf2	pleckstrin homology domain containing, family F (with FYVE domain) member 2	protein_coding	1.50476	3.71949	0.000199622	0.00268307	379	364	328	339	670	840	1100	8.84631	8.80839	8.95347	8.70143	9.48513	9.27583	9.40939
ENSMUSG00000021895	71704	Arhgef3	Rho guanine nucleotide exchange factor (GEF) 3	protein_coding	1.77897	3.71887	0.000200115	0.00268853	389	361	319	314	778	791	1489	8.88187	8.79712	8.91538	8.59773	9.69368	9.19272	9.8322
ENSMUSG00000026775	27377	Yme1l1	YME1-like 1 (S. cerevisiae)	protein_coding	1.62975	3.71767	0.000201071	0.00269515	911	909	746	847	1810	1854	3180	10.0649	10.0795	10.0974	9.96948	10.8865	10.3856	10.9054
ENSMUSG00000037410	67016	Tbc1d2b	TBC1 domain family, member 2B	protein_coding	1.46485	3.71759	0.000201136	0.00269515	973	818	669	968	1556	2079	2484	10.1577	9.93108	9.94406	10.1576	10.6715	10.5478	10.5544
ENSMUSG00000049103	12772	Ccr2	chemokine (C-C motif) receptor 2	protein_coding	2.94892	3.71612	0.000202304	0.00270658	616	380	547	423	3024	1289	2224	9.51654	8.86708	9.66181	9.00356	11.6191	9.87308	10.3977
ENSMUSG00000029417	17329	Cxcl9	chemokine (C-X-C motif) ligand 9	protein_coding	41.1635	3.71554	0.000202771	0.00270995	166	21	12	23	7222	320	526	7.75068	5.53849	5.26898	5.60788	12.8683	7.97404	8.40151
ENSMUSG00000027514	58203	Zbp1	Z-DNA binding protein 1	protein_coding	4.90708	3.71468	0.000203457	0.00271794	399	108	158	207	2712	572	1108	8.91658	7.22915	7.97487	8.04317	11.4634	8.74842	9.41945
ENSMUSG00000014498	237615	Ankrd52	ankyrin repeat domain 52	protein_coding	1.85093	3.7132	0.000204658	0.00273243	288	226	201	238	415	670	1177	8.47454	8.16849	8.29181	8.22696	8.82469	8.9643	9.5035
ENSMUSG00000029322	231507	Plac8	placenta-specific 8	protein_coding	8.62086	3.71304	0.000204784	0.00273243	519	267	424	477	10014	1163	3686	9.27856	8.38996	9.30726	9.16892	13.3384	9.72887	11.1158
ENSMUSG00000039167	170757	Adgrl4	adhesion G protein-coupled receptor L4	protein_coding	1.94312	3.71244	0.000205274	0.00273743	260	159	133	217	471	505	849	8.33771	7.71167	7.75228	8.10506	8.99785	8.57969	9.05135
ENSMUSG00000038604	75687	Ripor1	RHO family interacting cell polarization regulator 1	protein_coding	1.59327	3.71227	0.000205405	0.00273799	456	558	439	515	1059	1159	1598	9.09988	9.39648	9.35547	9.27486	10.1268	9.72405	9.9314
ENSMUSG00000027845	140917	Dclre1b	DNA cross-link repair 1B	protein_coding	2.05464	3.71118	0.000206293	0.00274744	100	83	62	65	223	200	349	7.121	6.91541	6.82117	6.62825	7.99455	7.37647	7.86164
ENSMUSG00000029110	19822	Rnf4	ring finger protein 4	protein_coding	1.46076	3.70968	0.000207522	0.0027602	1139	937	817	941	1590	2552	2775	10.3803	10.1223	10.2257	10.1177	10.7022	10.839	10.7117
ENSMUSG00000042302	216565	Ehbp1	EH domain binding protein 1	protein_coding	2.00443	3.70945	0.00020771	0.00276151	121	113	104	152	262	318	668	7.35294	7.28436	7.44153	7.64478	8.20634	7.96587	8.72367
ENSMUSG00000044254	100102	Pcsk9	proprotein convertase subtilisin/kexin type 9	protein_coding	3.9851	3.70931	0.000207828	0.00276187	48	18	8	12	121	115	166	6.29654	5.41541	4.99734	5.11769	7.22246	6.72021	6.94314
ENSMUSG00000030471	243983	Zdhhc13	zinc finger, DHHC domain containing 13	protein_coding	2.05323	3.70881	0.000208234	0.00276608	332	238	182	149	520	780	993	8.66628	8.23692	8.1603	7.61951	9.13397	9.17339	9.26747
ENSMUSG00000049115	11607	Agtr1a	angiotensin II receptor, type 1a	protein_coding	2.54942	3.70596	0.000210588	0.00279315	63	46	44	51	178	119	346	6.58801	6.26551	6.43996	6.36531	7.70364	6.75899	7.85049
ENSMUSG00000058794	18022	Nfe2	nuclear factor, erythroid derived 2	protein_coding	6.91751	3.70589	0.000210646	0.00279315	16	11	21	22	357	62	63	5.31644	5.06559	5.71705	5.57068	8.62029	6.06679	5.91584
ENSMUSG00000029084	12494	Cd38	CD38 antigen	protein_coding	4.53717	3.7058	0.000210728	0.00279315	218	113	215	151	2100	533	667	8.10446	7.28436	8.38155	7.63641	11.0982	8.65262	8.72164
ENSMUSG00000054693	11487	Adam10	a disintegrin and metallopeptidase domain 10	protein_coding	1.66655	3.70501	0.00021138	0.00280058	997	960	827	946	2275	2112	3078	10.1921	10.1565	10.2428	10.1251	11.2124	10.5702	10.859
ENSMUSG00000066000	112422	Zfp979	zinc finger protein 979	protein_coding	2.74765	3.70458	0.000211745	0.00280178	18	21	32	28	109	92	127	5.40566	5.53849	6.11113	5.77906	7.09654	6.47356	6.63704
ENSMUSG00000022517	17237	Mgrn1	mahogunin, ring finger 1	protein_coding	1.68489	3.7033	0.000212813	0.0028147	663	842	599	745	1551	1602	2750	9.6191	9.97173	9.78892	9.78933	10.6669	10.1791	10.6988
ENSMUSG00000022538	224092	Lsg1	large 60S subunit nuclear export GTPase 1	protein_coding	1.62614	3.70295	0.000213111	0.0028162	571	492	312	439	828	1323	1464	9.411	9.22206	8.88504	9.05456	9.78089	9.90964	9.80846
ENSMUSG00000084183		Gm12009	predicted gene 12009	processed_pseudogene	2.60055	3.70283	0.000213209	0.00281628	24	38	34	18	105	112	146	5.63968	6.07317	6.17175	5.40958	7.05196	6.69041	6.7945
ENSMUSG00000002458	56470	Rgs19	regulator of G-protein signaling 19	protein_coding	2.49934	3.70253	0.000213458	0.00281836	205	178	102	150	709	388	713	8.02385	7.85664	7.41739	7.62798	9.56396	8.22722	8.81236
ENSMUSG00000000058	12390	Cav2	caveolin 2	protein_coding	1.83934	3.70238	0.000213584	0.00281882	351	356	292	426	643	932	1777	8.74179	8.77813	8.79466	9.01326	9.42791	9.41999	10.0808
ENSMUSG00000070713		Gm10282	predicted pseudogene 10282	protein_coding	2.1967	3.70029	0.000215357	0.00283976	132	105	53	71	191	363	433	7.46087	7.19497	6.64355	6.72732	7.79391	8.13924	8.14316
ENSMUSG00000081476		Itpa-ps1	inosine triphosphatase (nucleoside triphosphate pyrophosphatase) pseudogene 1	processed_pseudogene	1.94121	3.6994	0.000216108	0.00284845	121	188	123	174	363	385	710	7.35294	7.92743	7.65257	7.81763	8.64283	8.21695	8.80662
ENSMUSG00000070583	14349	Fv1	Friend virus susceptibility 1	protein_coding	6.05578	3.69774	0.000217531	0.00286228	5	4	4	2	24	19	75	4.6266	4.5346	4.62649	4.28573	5.5503	5.09849	6.08348
ENSMUSG00000024481	74574	Lvrn	laeverin	protein_coding	2.36266	3.69535	0.000219587	0.00288684	154	137	117	190	615	350	674	7.65495	7.52312	7.58923	7.93141	9.36607	8.09127	8.73582
ENSMUSG00000079215	269704	Zfp664	zinc finger protein 664	protein_coding	1.87077	3.69444	0.000220372	0.00289593	349	497	257	364	750	970	1712	8.73403	9.23604	8.6214	8.79815	9.64244	9.47557	10.0283
ENSMUSG00000021537	12626	Cetn3	centrin 3	protein_coding	1.93069	3.68947	0.000224723	0.00294805	534	921	591	596	1643	1737	2917	9.31803	10.098	9.77008	9.47763	10.7488	10.2934	10.7826
ENSMUSG00000040044	50793	Orc3	origin recognition complex, subunit 3	protein_coding	1.80665	3.6884	0.000225667	0.00295916	140	202	161	186	421	439	663	7.53453	8.02102	7.9994	7.9038	8.84427	8.39156	8.71347
ENSMUSG00000058258	319554	Idi1	isopentenyl-diphosphate delta isomerase	protein_coding	2.31003	3.6871	0.000226823	0.00297234	67	63	76	131	211	280	494	6.6564	6.60191	7.0594	7.4577	7.92256	7.80115	8.31775
ENSMUSG00000033450	72536	Tagap	T cell activation Rho GTPase activating protein	protein_coding	11.3215	3.68705	0.000226866	0.00297234	2	10	2	2	125	35	17	4.28421	5.00528	4.3545	4.28573	7.26207	5.55063	4.92156
ENSMUSG00000038843	14537	Gcnt1	glucosaminyl (N-acetyl) transferase 1, core 2	protein_coding	3.12773	3.68594	0.000227863	0.00298412	62	53	28	55	309	131	245	6.57037	6.41408	5.98102	6.44566	8.42599	6.86928	7.41311
ENSMUSG00000027188	210622	Pamr1	peptidase domain containing associated with muscle regeneration 1	protein_coding	2.9247	3.68545	0.000228295	0.00298723	111	72	98	167	251	379	1118	7.24719	6.7517	7.36784	7.76486	8.1497	8.19617	9.43194
ENSMUSG00000022377	13196	Asap1	ArfGAP with SH3 domain, ankyrin repeat and PH domain1	protein_coding	1.69618	3.68482	0.000228868	0.00299345	560	520	297	483	835	1283	1796	9.38398	9.29865	8.81779	9.18617	9.79269	9.86653	10.0958
ENSMUSG00000030187	16633	Klra2	killer cell lectin-like receptor, subfamily A, member 2	protein_coding	33.5681	3.68444	0.000229208	0.00299662	15	3	8	1	740	45	72	5.26916	4.42245	4.99734	4.10919	9.62369	5.76645	6.0435
ENSMUSG00000024486	15200	Hbegf	heparin-binding EGF-like growth factor	protein_coding	3.40693	3.68341	0.000230133	0.00300615	1019	297	292	411	3232	2193	2131	10.2229	8.53282	8.79466	8.96409	11.7143	10.6236	10.3373
ENSMUSG00000024150	193813	Mcfd2	multiple coagulation factor deficiency 2	protein_coding	1.71895	3.681	0.000232318	0.00302672	1157	923	1037	1236	2704	2694	3622	10.4025	10.101	10.5632	10.5032	11.4591	10.9161	11.0908
ENSMUSG00000022346	17869	Myc	myelocytomatosis oncogene	protein_coding	1.55617	3.68077	0.000232534	0.00302672	610	502	453	625	1099	1262	1802	9.50291	9.24988	9.39905	9.54381	10.1791	9.84337	10.1005
ENSMUSG00000114608		Gm36161	predicted gene, 36161	lincRNA	4.97143	3.6807	0.000232597	0.00302672	32	29	72	74	658	156	296	5.89661	5.81754	6.99534	6.77434	9.45998	7.0746	7.6506
ENSMUSG00000114607		Gm8990	predicted gene 8990	processed_pseudogene	7.36491	3.6804	0.000232869	0.00302898	3	9	2	1	18	34	95	4.41788	4.94129	4.3545	4.10919	5.32476	5.52687	6.32346
ENSMUSG00000078763	20555	Slfn1	schlafen 1	protein_coding	11.6768	3.67655	0.000236407	0.00307109	98	23	59	44	1864	251	511	7.09679	5.61422	6.76443	6.21226	10.9283	7.66134	8.36285
ENSMUSG00000037966	18081	Ninj1	ninjurin 1	protein_coding	2.23347	3.67437	0.000238435	0.00309481	1231	923	1176	1202	4511	2836	4456	10.4903	10.101	10.7418	10.4637	12.1923	10.9893	11.3866
ENSMUSG00000038507	243771	Parp12	poly (ADP-ribose) polymerase family, member 12	protein_coding	2.43594	3.67295	0.00023977	0.00311081	474	345	344	382	1818	1007	1423	9.15323	8.73545	9.0188	8.86398	10.8927	9.5277	9.76864
ENSMUSG00000055254	18212	Ntrk2	neurotrophic tyrosine kinase, receptor, type 2	protein_coding	2.4927	3.67095	0.000241646	0.00313327	219	269	174	344	1107	584	1193	8.11047	8.39994	8.10111	8.7213	10.1894	8.77666	9.52231
ENSMUSG00000016382	102866	Pls3	plastin 3 (T-isoform)	protein_coding	1.90187	3.67089	0.000241705	0.00313327	2417	1263	1504	1683	3231	6258	6946	11.4511	10.5445	11.092	10.9419	11.7139	12.1212	12.0221
ENSMUSG00000053730	230770	Tmem39b	transmembrane protein 39b	protein_coding	1.58469	3.67046	0.000242115	0.00313726	138	119	103	119	228	321	385	7.51647	7.3479	7.42951	7.33864	8.02352	7.9781	7.9891
ENSMUSG00000066878		Gm10184	predicted pseudogene 10184	protein_coding	3.58613	3.66906	0.000243445	0.00315316	17	19	20	8	35	114	159	5.36189	5.45783	5.67453	4.86873	5.88082	6.71035	6.89288
ENSMUSG00000102222	93722	Pcdhga10	protocadherin gamma subfamily A, 10	protein_coding	20.1097	3.66856	0.000243919	0.00315796	0	2	1	0	21	9	46	3.67762	4.28798	4.15842	3.67762	5.44277	4.67552	5.63435
ENSMUSG00000041740	50849	Rnf10	ring finger protein 10	protein_coding	1.4496	3.66786	0.00024459	0.00316532	4869	4754	4279	5676	8164	11346	15829	12.4549	12.4386	12.5895	12.6825	13.0446	12.9759	13.2055
ENSMUSG00000022967	15975	Ifnar1	interferon (alpha and beta) receptor 1	protein_coding	2.00855	3.66545	0.000246906	0.00318855	469	441	356	413	1426	997	1505	9.13861	9.07115	9.06593	8.97074	10.5477	9.5138	9.8472
ENSMUSG00000048920	243853	Fkrp	fukutin related protein	protein_coding	2.03281	3.66505	0.00024729	0.00319216	217	371	273	311	742	736	1502	8.09841	8.83436	8.7032	8.58477	9.62746	9.09336	9.8444
ENSMUSG00000026479	16782	Lamc2	laminin, gamma 2	protein_coding	2.33469	3.66396	0.000248347	0.00320312	1603	1323	923	1500	5467	5079	3412	10.8653	10.6104	10.3981	10.7781	12.4682	11.8219	11.0057
ENSMUSG00000070462	80889	Tlnrd1	talin rod domain containing 1	protein_coding	1.70129	3.66317	0.000249108	0.00321064	428	340	345	536	921	1098	1387	9.01275	8.71563	9.02279	9.33023	9.93027	9.64843	9.73276
ENSMUSG00000030894	12751	Tpp1	tripeptidyl peptidase I	protein_coding	1.60384	3.66293	0.00024935	0.00321064	899	886	897	1048	2020	2179	3118	10.0462	10.0434	10.3577	10.2697	11.0428	10.6145	10.8774
ENSMUSG00000024778	14102	Fas	Fas (TNF receptor superfamily member 6)	protein_coding	3.12068	3.66227	0.000249987	0.0032175	89	127	98	130	754	278	490	6.98246	7.42845	7.36784	7.44814	9.64988	7.79194	8.30693
ENSMUSG00000059555	227612	Tor4a	torsin family 4, member A	protein_coding	2.10663	3.66146	0.000250786	0.00322506	405	248	180	321	932	796	1111	8.93701	8.29155	8.14573	8.62753	9.94696	9.20143	9.42321
ENSMUSG00000023349	56620	Clec4n	C-type lectin domain family 4, member n	protein_coding	4.19758	3.66091	0.000251321	0.00323059	374	79	157	175	1862	737	914	8.82819	6.85806	7.9666	7.82501	10.9268	9.09523	9.15293
ENSMUSG00000054920	71778	Klhl5	kelch-like 5	protein_coding	1.87588	3.66041	0.00025181	0.00323417	304	413	246	263	821	775	1169	8.54725	8.98105	8.56234	8.35976	9.76899	9.16452	9.49401
ENSMUSG00000089929	12045	Bcl2a1b	B cell leukemia/lymphoma 2 related protein A1b	protein_coding	6.09043	3.65981	0.0002524	0.00323902	24	4	20	19	260	95	72	5.63968	4.5346	5.67453	5.45189	8.19621	6.50833	6.0435
ENSMUSG00000021388	66695	Aspn	asporin	protein_coding	2.85795	3.65846	0.000253734	0.00325342	190	211	343	328	698	821	2612	7.92484	8.07811	9.01481	8.65672	9.54216	9.24417	10.6257
ENSMUSG00000037242	29876	Clic4	chloride intracellular channel 4 (mitochondrial)	protein_coding	2.12232	3.65617	0.000256013	0.00327987	1542	1768	1884	2193	6264	4213	8355	10.8101	11.0228	11.4136	11.3194	12.6637	11.5543	12.2871
ENSMUSG00000081251		Gm12164	predicted gene 12164	processed_pseudogene	29.0517	3.65554	0.000256641	0.0032852	1	0	0	0	12	13	18	4.10811	3.67762	3.67762	3.67762	5.04499	4.86703	4.95546
ENSMUSG00000073079	24067	Srp54a	signal recognition particle 54A	protein_coding	12.6642	3.6544	0.000257784	0.00329707	0	8	2	1	24	19	148	3.67762	4.87298	4.3545	4.10919	5.5503	5.09849	6.81009
ENSMUSG00000021108	18755	Prkch	protein kinase C, eta	protein_coding	2.11697	3.65278	0.000259413	0.00331376	714	390	344	357	1016	1386	2401	9.72271	8.90258	9.0188	8.77172	10.0684	9.97503	10.5062
ENSMUSG00000079659	652925	Tmem243	transmembrane protein 243, mitochondrial	protein_coding	2.25772	3.65236	0.000259837	0.00331641	79	145	92	110	390	292	453	6.84354	7.59459	7.29013	7.24233	8.74012	7.85524	8.20277
ENSMUSG00000099143		Gm27483	predicted gene, 27483	misc_RNA	41.7616	3.65109	0.000261129	0.00333013	0	0	0	0	9	8	22	3.67762	3.67762	3.67762	3.67762	4.8722	4.62045	5.08097
ENSMUSG00000029513	19079	Prkab1	protein kinase, AMP-activated, beta 1 non-catalytic subunit	protein_coding	1.57542	3.65083	0.000261398	0.00333217	470	350	320	357	721	931	1251	9.14154	8.75501	8.91966	8.77172	9.58738	9.4185	9.58851
ENSMUSG00000034902	18717	Pip5k1c	phosphatidylinositol-4-phosphate 5-kinase, type 1 gamma	protein_coding	1.5831	3.65055	0.00026168	0.00333438	1047	796	634	855	1744	2147	2454	10.2612	9.89277	9.86857	9.98271	10.8336	10.5935	10.5372
ENSMUSG00000024013	26382	Fgd2	FYVE, RhoGEF and PH domain containing 2	protein_coding	2.75975	3.64835	0.000263931	0.00335903	160	125	139	89	676	330	631	7.70362	7.40873	7.80894	6.98842	9.49754	8.01419	8.64642
ENSMUSG00000022584	100041546	Ly6c2	lymphocyte antigen 6 complex, locus C2	protein_coding	26.5945	3.64769	0.000264608	0.00336609	57	8	20	15	2151	96	204	6.47868	4.87298	5.67453	5.27283	11.1324	6.51972	7.1886
ENSMUSG00000043940	72145	Wdfy3	WD repeat and FYVE domain containing 3	protein_coding	1.55504	3.64523	0.000267148	0.00339011	537	415	428	476	908	1108	1540	9.3258	8.98768	9.32028	9.16602	9.9103	9.66111	9.87946
ENSMUSG00000038305	67198	Spats2l	spermatogenesis associated, serine-rich 2-like	protein_coding	1.74144	3.64522	0.00026716	0.00339011	80	84	70	112	175	257	311	6.85806	6.92939	6.96218	7.26431	7.68198	7.69141	7.71355
ENSMUSG00000044461	219134	Shisa2	shisa family member 2	protein_coding	2.36592	3.64484	0.000267559	0.00339371	310	530	417	658	1647	1161	2709	8.5736	9.32504	9.28421	9.6156	10.7522	9.72646	10.6775
ENSMUSG00000002326	105446	Gmpr2	guanosine monophosphate reductase 2	protein_coding	1.82276	3.64474	0.000267665	0.00339371	227	207	157	214	571	519	634	8.15772	8.05302	7.9666	8.08677	9.26319	8.61662	8.65284
ENSMUSG00000071252	72371	2210408I21Rik	RIKEN cDNA 2210408I21 gene	protein_coding	2.31445	3.6434	0.000269065	0.00341005	20	22	20	25	72	77	94	5.4887	5.57693	5.67453	5.67913	6.61783	6.28526	6.31241
ENSMUSG00000079190	100041057		nuclear body protein SP140-like	protein_coding	46.9778	3.64199	0.000270535	0.00342302	0	0	0	0	17	5	18	3.67762	3.67762	3.67762	3.67762	5.28265	4.42785	4.95546
ENSMUSG00000107465		Gm5990	predicted gene 5990	processed_pseudogene	41.4084	3.64163	0.000270921	0.00342649	0	0	0	0	13	8	15	3.67762	3.67762	3.67762	3.67762	5.09678	4.62045	4.85009
ENSMUSG00000051444	241950	Bbs12	Bardet-Biedl syndrome 12 (human)	protein_coding	2.20627	3.64002	0.000272616	0.00344366	22	32	27	25	73	106	108	5.56648	5.90836	5.94641	5.67913	6.63317	6.62882	6.45953
ENSMUSG00000075284	215280	Wipf1	WAS/WASL interacting protein family, member 1	protein_coding	2.51669	3.63928	0.000273399	0.00345212	241	208	300	346	1245	687	1300	8.23685	8.05933	8.83149	8.72917	10.3554	8.99866	9.64216
ENSMUSG00000030782	21804	Tgfb1i1	transforming growth factor beta 1 induced transcript 1	protein_coding	1.96442	3.63741	0.000275397	0.00347164	211	140	187	277	467	600	933	8.06161	7.55035	8.19609	8.4291	8.98615	8.81347	9.18132
ENSMUSG00000046687		Gm5424	predicted gene 5424	processed_pseudogene	2.79752	3.63552	0.000277417	0.00349279	450	426	149	209	1382	1465	1037	9.08164	9.02359	7.89866	8.05576	10.5032	10.053	9.32753
ENSMUSG00000113389		Gm9512	predicted gene 9512	processed_pseudogene	1.61399	3.63526	0.000277699	0.0034949	926	725	629	617	1470	1893	2360	10.0879	9.76173	9.85746	9.52585	10.5908	10.415	10.4818
ENSMUSG00000037820	21817	Tgm2	transglutaminase 2, C polypeptide	protein_coding	2.763	3.63378	0.000279296	0.00351067	2040	2234	1728	3190	12001	4582	12388	11.2089	11.3566	11.2901	11.8555	13.599	11.6745	12.8529
ENSMUSG00000031875	68119	Cmtm3	CKLF-like MARVEL transmembrane domain containing 3	protein_coding	2.23555	3.6328	0.000280365	0.00352199	793	341	479	714	1947	1755	2477	9.86981	8.71961	9.47664	9.7298	10.9904	10.3079	10.5504
ENSMUSG00000028597	67305	Gpx7	glutathione peroxidase 7	protein_coding	1.8087	3.63229	0.000280921	0.00352677	451	256	295	429	817	1067	1267	9.0847	8.33381	8.80858	9.0229	9.76215	9.60843	9.60625
ENSMUSG00000095028	668101	Sirpb1b	signal-regulatory protein beta 1B	protein_coding	8.61202	3.63108	0.000282239	0.00354041	11	4	2	9	155	32	29	5.0575	4.5346	4.3545	4.93682	7.52849	5.47792	5.2709
ENSMUSG00000040229	23890	Gpr34	G protein-coupled receptor 34	protein_coding	2.86064	3.63091	0.000282424	0.00354128	59	21	44	32	107	159	315	6.51609	5.53849	6.43996	5.90133	7.07443	7.09735	7.72988
ENSMUSG00000022404	20524	Slc25a17	solute carrier family 25 (mitochondrial carrier, peroxisomal membrane protein), member 17	protein_coding	1.70081	3.63074	0.000282608	0.00354214	747	668	509	557	957	2027	2371	9.78599	9.64717	9.56128	9.38355	9.98419	10.5119	10.4884
ENSMUSG00000030223	19277	Ptpro	protein tyrosine phosphatase, receptor type, O	protein_coding	2.99704	3.63007	0.000283345	0.00354992	146	63	96	78	563	280	462	7.58739	6.60191	7.34241	6.83469	9.24367	7.80115	8.22881
ENSMUSG00000044795	327951	Cyb5d1	cytochrome b5 domain containing 1	protein_coding	3.64419	3.62335	0.000290808	0.00363599	13	21	12	12	49	48	180	5.16834	5.53849	5.26898	5.11769	6.20817	5.82469	7.03859
ENSMUSG00000078922	21822	Tgtp1	T cell specific GTPase 1	protein_coding	34.1412	3.62153	0.000292861	0.00365569	7	0	4	3	372	23	68	4.79285	3.67762	4.62649	4.41971	8.676	5.22903	5.98827
ENSMUSG00000058806	12817	Col13a1	collagen, type XIII, alpha 1	protein_coding	2.98737	3.62075	0.000293746	0.00366524	143	39	53	104	348	497	335	7.5612	6.09876	6.64355	7.1743	8.5858	8.55815	7.80884
ENSMUSG00000024070	75292	Prkd3	protein kinase D3	protein_coding	1.81866	3.61966	0.000294993	0.00367482	214	226	256	272	580	597	1008	8.08013	8.16849	8.61613	8.40472	9.28484	8.80664	9.28823
ENSMUSG00000079057	102294	Cyp4v3	cytochrome P450, family 4, subfamily v, polypeptide 3	protein_coding	2.81674	3.61905	0.000295686	0.00368048	132	131	97	110	685	278	508	7.46087	7.46707	7.35518	7.24233	9.51596	7.79194	8.355
ENSMUSG00000045312	218454	Lhfpl2	lipoma HMGIC fusion partner-like 2	protein_coding	2.0964	3.6189	0.000295854	0.00368106	243	157	115	239	588	512	760	8.24781	7.69552	7.56748	8.23251	9.30382	8.59827	8.89951
ENSMUSG00000048126	12835	Col6a3	collagen, type VI, alpha 3	protein_coding	2.07877	3.61813	0.000296734	0.00369051	2856	1578	1910	2929	4461	7175	13153	11.6899	10.8609	11.4332	11.7333	12.1763	12.3174	12.9391
ENSMUSG00000036632	66248	Alg5	asparagine-linked glycosylation 5 (dolichyl-phosphate beta-glucosyltransferase)	protein_coding	1.6401	3.61722	0.000297785	0.00370057	647	437	388	608	1040	1442	1670	9.585	9.05862	9.18454	9.50538	10.1013	10.0308	9.99337
ENSMUSG00000009545	16535	Kcnq1	potassium voltage-gated channel, subfamily Q, member 1	protein_coding	2.41152	3.61693	0.000298113	0.00370315	26	23	40	28	90	109	155	5.70888	5.61422	6.33889	5.77906	6.87101	6.65995	6.86333
ENSMUSG00000026047	72050	Poglut2	protein O-glucosyltransferase 2	protein_coding	2.22105	3.61564	0.000299611	0.00372026	67	62	56	104	221	185	376	6.6564	6.58423	6.70529	7.1743	7.9828	7.28059	7.95828
ENSMUSG00000055319	207352	Sec23ip	Sec23 interacting protein	protein_coding	1.48869	3.61477	0.000300613	0.00373118	538	592	493	489	979	1285	1608	9.32838	9.47872	9.51676	9.20322	10.0162	9.86871	9.94017
ENSMUSG00000049744	76117	Arhgap15	Rho GTPase activating protein 15	protein_coding	2.72826	3.61421	0.000301267	0.00373675	72	49	69	72	351	190	273	6.73743	6.33116	6.94531	6.74317	8.59739	7.31327	7.54835
ENSMUSG00000006932	12387	Ctnnb1	catenin (cadherin associated protein), beta 1	protein_coding	1.5131	3.61418	0.000301305	0.00373675	5601	6662	4267	5194	8716	14357	17935	12.6561	12.9235	12.5855	12.555	13.1387	13.3145	13.3852
ENSMUSG00000039747	269717	Orai2	ORAI calcium release-activated calcium modulator 2	protein_coding	1.87295	3.61406	0.000301439	0.00373689	182	161	96	126	373	430	450	7.8691	7.72764	7.34241	7.40929	8.67963	8.36389	8.19398
ENSMUSG00000103355		Gm2147	predicted gene 2147	processed_pseudogene	29.4729	3.61369	0.000301871	0.00373922	0	0	0	1	14	10	19	3.67762	3.67762	3.67762	4.10919	5.14621	4.72729	4.98827
ENSMUSG00000049988	211228	Lrrc25	leucine rich repeat containing 25	protein_coding	4.08948	3.61254	0.000303212	0.00375281	337	86	239	216	2123	730	1012	8.68654	6.95694	8.52346	8.09899	11.1137	9.08209	9.29371
ENSMUSG00000020116	66249	Pno1	partner of NOB1 homolog	protein_coding	1.9527	3.61114	0.000304855	0.00377161	252	426	281	262	730	814	1431	8.2961	9.02359	8.74242	8.35468	9.60469	9.23233	9.7765
ENSMUSG00000021785	59007	Ngly1	N-glycanase 1	protein_coding	1.66665	3.61007	0.000306119	0.0037842	425	532	435	419	967	1074	1694	9.00309	9.33027	9.34277	8.99052	9.99881	9.61756	10.0134
ENSMUSG00000030298	110379	Sec13	SEC13 homolog, nuclear pore and COPII coat complex component	protein_coding	1.52939	3.60947	0.000306823	0.00379137	1340	1578	1250	1346	2869	3284	4071	10.6106	10.8609	10.8286	10.6242	11.5439	11.1984	11.2576
ENSMUSG00000024053	246707	Emilin2	elastin microfibril interfacer 2	protein_coding	2.29786	3.6092	0.000307145	0.00379229	995	571	795	998	3394	2207	3359	10.1893	9.42848	10.1871	10.2006	11.7844	10.6326	10.9834
ENSMUSG00000052776	246730	Oas1a	2'-5' oligoadenylate synthetase 1A	protein_coding	3.17813	3.60799	0.000308573	0.00380532	227	74	143	142	935	446	716	8.15772	6.78292	7.8455	7.55874	9.95148	8.41272	8.81808
ENSMUSG00000112140		Gm5780	predicted gene 5780	processed_pseudogene	14.2241	3.60556	0.000311481	0.00383809	0	4	1	1	12	14	92	3.67762	4.5346	4.15842	4.10919	5.04499	4.90942	6.29005
ENSMUSG00000028530	16451	Jak1	Janus kinase 1	protein_coding	1.62233	3.60353	0.000313919	0.00386503	2033	1654	1593	1849	3851	3887	6436	11.204	10.9278	11.174	11.0759	11.9654	11.4392	11.9128
ENSMUSG00000069792	100034251	Wfdc17	WAP four-disulfide core domain 17	protein_coding	3.69073	3.60222	0.000315515	0.00388312	1467	347	1221	876	7598	3595	5106	10.7392	8.74331	10.7952	10.0168	12.9412	11.3276	11.5813
ENSMUSG00000038301	71982	Snx10	sorting nexin 10	protein_coding	3.7494	3.6017	0.000316141	0.00388926	130	197	104	180	1392	358	638	7.44184	7.98829	7.44153	7.86136	10.5134	8.12098	8.66136
ENSMUSG00000021127	12192	Zfp36l1	zinc finger protein 36, C3H type-like 1	protein_coding	1.62157	3.60022	0.000317946	0.00390989	1814	1777	1243	1465	3568	3598	5113	11.0414	11.03	10.8206	10.7445	11.856	11.3288	11.5833
ENSMUSG00000031662	71607	Snx20	sorting nexin 20	protein_coding	4.2948	3.59884	0.000319637	0.00392754	277	108	143	202	2008	617	560	8.42233	7.22915	7.8455	8.01119	11.0343	8.85158	8.48547
ENSMUSG00000045930	66864	Clec14a	C-type lectin domain family 14, member a	protein_coding	2.72888	3.59728	0.000321563	0.00394803	232	67	82	101	340	540	758	8.18649	6.67047	7.15038	7.13903	8.55443	8.67029	8.89591
ENSMUSG00000026784	56075	Pdss1	prenyl (solanesyl) diphosphate synthase, subunit 1	protein_coding	2.33701	3.59606	0.000323079	0.00396046	439	166	306	415	742	1356	1854	9.04761	7.7668	8.85852	8.97737	9.62746	9.94426	10.1406
ENSMUSG00000039058	229949	Ak5	adenylate kinase 5	protein_coding	4.55524	3.59605	0.000323092	0.00396046	2	11	7	6	41	31	75	4.28421	5.06559	4.91713	4.71614	6.03101	5.45269	6.08348
ENSMUSG00000080708		Ccnd3-ps	cyclin D3, pseudogene	processed_pseudogene	3.57037	3.59575	0.00032346	0.0039618	10	10	6	5	37	56	39	4.9975	5.00528	4.82993	4.62892	5.9328	5.9684	5.49754
ENSMUSG00000029387	209357	Gtf2h3	general transcription factor IIH, polypeptide 3	protein_coding	1.66326	3.59529	0.00032403	0.00396719	213	296	206	228	490	585	859	8.07399	8.52828	8.3245	8.1702	9.05217	8.77899	9.06745
ENSMUSG00000021130	108760	Galnt16	polypeptide N-acetylgalactosaminyltransferase 16	protein_coding	2.20732	3.59335	0.000326455	0.0039921	382	229	351	493	1032	959	2012	8.85707	8.18591	9.04648	9.21448	10.0904	9.4597	10.256
ENSMUSG00000030921	20128	Trim30a	tripartite motif-containing 30A	protein_coding	3.33362	3.59028	0.000330319	0.00403131	206	118	177	205	1327	407	847	8.03021	7.33751	8.12359	8.03047	10.4457	8.29066	9.04811
ENSMUSG00000016128	243362	Stard13	StAR-related lipid transfer (START) domain containing 13	protein_coding	1.73602	3.59003	0.000330643	0.00403206	75	66	51	81	142	209	228	6.78389	6.65365	6.60081	6.8783	7.41909	7.43105	7.32428
ENSMUSG00000054720	100604	Lrrc8c	leucine rich repeat containing 8 family, member C	protein_coding	2.37811	3.58968	0.00033109	0.0040343	186	110	109	192	629	430	558	7.89724	7.25149	7.50016	7.94502	9.39732	8.36389	8.48066
ENSMUSG00000051506	545030	Wdfy4	WD repeat and FYVE domain containing 4	protein_coding	2.57978	3.58932	0.000331541	0.00403818	120	107	103	85	528	292	391	7.34272	7.21785	7.42951	6.93444	9.15502	7.85524	8.00929
ENSMUSG00000039007	54381	Cpq	carboxypeptidase Q	protein_coding	1.83126	3.5889	0.000332076	0.0040431	315	252	262	317	691	636	1267	8.59519	8.31284	8.64746	8.61058	9.52811	8.89301	9.60625
ENSMUSG00000106666		Gm43587	predicted gene 43587	processed_pseudogene	3.05438	3.58775	0.000333549	0.00405942	12	21	7	9	40	71	73	5.11432	5.53849	4.91713	4.93682	6.00713	6.20205	6.05696
ENSMUSG00000020642	108089	Rnf144a	ring finger protein 144A	protein_coding	2.199	3.58736	0.000334049	0.00405942	114	89	75	131	382	278	378	7.27975	6.99729	7.04366	7.4577	8.71197	7.79194	7.96519
ENSMUSG00000038299	225348	Wdr36	WD repeat domain 36	protein_coding	1.42353	3.58733	0.000334075	0.00405942	506	585	459	587	919	1278	1545	9.24346	9.46217	9.41733	9.45646	9.92722	9.86105	9.88402
ENSMUSG00000022721	15547	Trmt2a	TRM2 tRNA methyltransferase 2A	protein_coding	1.50926	3.58733	0.000334079	0.00405942	539	481	326	459	839	1141	1330	9.33095	9.19082	8.94509	9.11588	9.79939	9.70215	9.67405
ENSMUSG00000029019	18158	Nppb	natriuretic peptide type B	protein_coding	14.3415	3.58711	0.000334367	0.00406131	47	25	6	21	1020	106	204	6.27473	5.68565	4.82993	5.53234	10.0739	6.62882	7.1886
ENSMUSG00000049723	17381	Mmp12	matrix metallopeptidase 12	protein_coding	13.7153	3.58698	0.000334529	0.00406166	95	85	54	49	3020	239	390	7.0597	6.94323	6.66443	6.3233	11.6172	7.59924	8.00594
ENSMUSG00000071497		Nutf2-ps1	nuclear transport factor 2, pseudogene 1	protein_coding	2.28406	3.58612	0.000335631	0.00407202	35	61	63	44	143	171	271	5.98126	6.56632	6.83959	6.21226	7.42781	7.18486	7.5391
ENSMUSG00000043832	73149	Clec4a3	C-type lectin domain family 4, member a3	protein_coding	3.93342	3.58611	0.000335647	0.00407202	206	77	95	117	1166	328	552	8.03021	6.82848	7.32952	7.3178	10.2627	8.00625	8.46615
ENSMUSG00000026712	17533	Mrc1	mannose receptor, C type 1	protein_coding	2.52383	3.58591	0.0003359	0.00407347	1296	720	1490	1306	5313	3360	5775	10.5633	9.75204	11.0787	10.5813	12.4271	11.231	11.7576
ENSMUSG00000030881	76932	Arfip2	ADP-ribosylation factor interacting protein 2	protein_coding	1.56311	3.58575	0.00033611	0.0040744	542	439	343	453	724	1155	1599	9.33865	9.0649	9.01481	9.09776	9.59317	9.71921	9.93228
ENSMUSG00000048960	109294	Prex2	phosphatidylinositol-3,4,5-trisphosphate-dependent Rac exchange factor 2	protein_coding	3.29611	3.58559	0.000336317	0.0040753	25	58	20	60	200	111	330	5.67475	6.51117	5.67453	6.53995	7.85324	6.68033	7.78951
ENSMUSG00000091649	236451	Phf11b	PHD finger protein 11B	protein_coding	3.87112	3.58457	0.00033764	0.00408648	39	11	32	36	224	86	217	6.08635	5.06559	6.11113	6.0132	8.00039	6.4013	7.26369
ENSMUSG00000101523		Csnk2a3	casein kinase 2 alpha 3	processed_pseudogene	2.16358	3.58345	0.000339084	0.00410073	77	86	80	86	160	240	530	6.81403	6.95694	7.12069	6.94813	7.56843	7.60452	8.41164
ENSMUSG00000017119	17966	Nbr1	NBR1, autophagy cargo receptor	protein_coding	1.38217	3.58259	0.000340199	0.00411258	1309	1378	1026	1388	2020	2870	3844	10.5774	10.6682	10.548	10.6678	11.0428	11.0062	11.1757
ENSMUSG00000040618	74551	Pck2	phosphoenolpyruvate carboxykinase 2 (mitochondrial)	protein_coding	1.64748	3.58235	0.000340517	0.0041141	557	387	416	484	1042	1195	1434	9.37652	8.89202	9.28088	9.18903	10.104	9.76688	9.77943
ENSMUSG00000033581	319765	Igf2bp2	insulin-like growth factor 2 mRNA binding protein 2	protein_coding	2.58103	3.58144	0.000341708	0.00412431	71	37	52	75	263	165	279	6.72159	6.04707	6.62234	6.78967	8.21138	7.14178	7.57573
ENSMUSG00000031616	13617	Ednra	endothelin receptor type A	protein_coding	1.94345	3.57899	0.000344929	0.00415732	176	116	84	173	343	381	565	7.82583	7.31649	7.17945	7.81021	8.56627	8.20313	8.49741
ENSMUSG00000052056	228913	Zfp217	zinc finger protein 217	protein_coding	1.48273	3.57884	0.000345119	0.00415732	482	400	340	455	793	1062	1161	9.17632	8.93722	9.00275	9.10382	9.7204	9.60187	9.48445
ENSMUSG00000021013	76260	Ttc8	tetratricopeptide repeat domain 8	protein_coding	2.38959	3.57844	0.00034565	0.0041605	25	54	51	54	126	164	267	5.67475	6.43405	6.60081	6.42601	7.2718	7.13447	7.52043
ENSMUSG00000021281	21928	Tnfaip2	tumor necrosis factor, alpha-induced protein 2	protein_coding	4.27247	3.578	0.000346231	0.00416355	684	284	524	1062	6591	1464	3483	9.66267	8.47265	9.6018	10.2884	12.7368	10.0521	11.035
ENSMUSG00000050550		Gm11868	predicted gene 11868	processed_pseudogene	1.7973	3.57649	0.000348235	0.00418169	105	114	81	88	230	236	388	7.17975	7.29515	7.13561	6.97512	8.03494	7.58329	7.99923
ENSMUSG00000023249	235587	Parp3	poly (ADP-ribose) polymerase family, member 3	protein_coding	2.60489	3.57515	0.000350033	0.00419998	316	528	394	575	1904	916	2849	8.59947	9.3198	9.20574	9.42773	10.9586	9.39593	10.7491
ENSMUSG00000100701		Gm19587	predicted gene, 19587	processed_pseudogene	5.53344	3.57386	0.000351755	0.004219	2	7	5	1	20	35	52	4.28421	4.79955	4.73396	4.10919	5.40471	5.55063	5.74085
ENSMUSG00000039981	237256	Zc3h12d	zinc finger CCCH type containing 12D	protein_coding	3.24937	3.57319	0.000352659	0.00422653	35	20	16	21	149	80	103	5.98126	5.49882	5.4885	5.53234	7.47904	6.32504	6.40877
ENSMUSG00000037720	67878	Tmem33	transmembrane protein 33	protein_coding	1.64705	3.57264	0.000353402	0.00423213	763	639	428	630	1353	1743	1730	9.8157	9.58519	9.32028	9.55492	10.4732	10.2982	10.043
ENSMUSG00000002602	26362	Axl	AXL receptor tyrosine kinase	protein_coding	1.64188	3.572	0.000354261	0.00423851	1877	1525	1489	1958	3618	3760	6475	11.0901	10.8122	11.0777	11.1576	11.8759	11.3917	11.9215
ENSMUSG00000105504	229898	Gbp5	guanylate binding protein 5	protein_coding	11.3339	3.57194	0.00035435	0.00423851	53	29	29	74	1532	129	357	6.40069	5.81754	6.01475	6.77434	10.6494	6.85149	7.89096
ENSMUSG00000115518		Gm10791	predicted gene 10791	antisense	28.1114	3.57151	0.000354935	0.00424384	0	0	1	0	13	11	17	3.67762	3.67762	4.15842	3.67762	5.09678	4.77623	4.92156
ENSMUSG00000029661	12843	Col1a2	collagen, type I, alpha 2	protein_coding	1.78544	3.56988	0.000357144	0.0042686	39747	27659	24127	33816	49809	93202	143440	15.4783	14.9737	15.0799	15.2526	15.65	16.01	16.3818
ENSMUSG00000029082	12182	Bst1	bone marrow stromal cell antigen 1	protein_coding	9.20631	3.56765	0.000360196	0.00430004	131	46	109	73	2359	352	647	7.45139	6.26551	7.50016	6.75884	11.2641	8.09875	8.68034
ENSMUSG00000099662		Ppp1r2-ps2	protein phosphatase 1, regulatory (inhibitor) subunit 2, pseudogene 2	processed_pseudogene	6.1181	3.56688	0.000361253	0.00431098	6	2	3	1	31	25	30	4.71362	4.28798	4.50295	4.10919	5.77022	5.28906	5.29562
ENSMUSG00000020263	216190	Appl2	adaptor protein, phosphotyrosine interaction, PH domain and leucine zipper containing 2	protein_coding	1.70553	3.56667	0.000361543	0.00431121	331	450	270	321	591	970	1389	8.6622	9.09896	8.68821	8.62753	9.31087	9.47557	9.73478
ENSMUSG00000041720	224020	Pi4ka	phosphatidylinositol 4-kinase alpha	protein_coding	1.42383	3.56659	0.000361659	0.00431121	753	618	549	658	1114	1519	1878	9.79721	9.53859	9.66691	9.6156	10.1983	10.104	10.1587
ENSMUSG00000038260	68667	Trpm4	transient receptor potential cation channel, subfamily M, member 4	protein_coding	1.55302	3.56656	0.000361694	0.00431121	366	372	273	339	512	946	1184	8.79872	8.83804	8.7032	8.70143	9.11261	9.44072	9.51176
ENSMUSG00000082274		Gm14026	predicted gene 14026	processed_pseudogene	2.72006	3.56494	0.000363942	0.00433126	15	36	37	36	81	135	222	5.26916	6.02046	6.25788	6.0132	6.75013	6.9042	7.29155
ENSMUSG00000021998	18826	Lcp1	lymphocyte cytosolic protein 1	protein_coding	3.22197	3.56465	0.000364345	0.00433438	1459	637	931	1133	7557	3394	3401	10.7315	9.58082	10.4104	10.38	12.9334	11.2454	11.0011
ENSMUSG00000053338	245126	Tarm1	T cell-interacting, activating receptor on myeloid cells 1	protein_coding	19.0576	3.56426	0.000364881	0.00433849	21	18	9	22	1067	49	96	5.5282	5.41541	5.07183	5.57068	10.1374	5.84354	6.33442
ENSMUSG00000037972	20621	Snn	stannin	protein_coding	1.73826	3.56405	0.000365175	0.0043392	445	354	302	330	563	1284	1297	9.06627	8.77047	8.84056	8.66495	9.24367	9.86762	9.63893
ENSMUSG00000020495	74133	Smg8	smg-8 homolog, nonsense mediated mRNA decay factor (C. elegans)	protein_coding	1.7559	3.56345	0.000366019	0.00434754	205	171	102	140	332	442	544	8.02385	7.80492	7.41739	7.54089	8.52237	8.40067	8.44657
ENSMUSG00000008682	110954	Rpl10	ribosomal protein L10	protein_coding	2.02305	3.56308	0.000366534	0.00435095	87	164	72	118	282	386	406	6.95575	7.75126	6.99534	7.32826	8.30393	8.22038	8.05854
ENSMUSG00000034748	50721	Sirt6	sirtuin 6	protein_coding	1.60975	3.56189	0.000368195	0.00436662	150	156	94	151	268	371	442	7.62157	7.68737	7.31651	7.63641	8.23632	8.16799	8.17029
ENSMUSG00000031375	12111	Bgn	biglycan	protein_coding	2.30685	3.56177	0.000368361	0.00436689	8981	4109	8201	9592	25144	22189	40240	13.3351	12.2293	13.5252	13.4371	14.6645	13.9413	14.5492
ENSMUSG00000020455	94091	Trim11	tripartite motif-containing 11	protein_coding	1.46477	3.56043	0.000370252	0.00438422	549	496	393	515	919	1244	1297	9.35645	9.23325	9.20222	9.27486	9.92722	9.82321	9.63893
ENSMUSG00000028016	71793	Ints12	integrator complex subunit 12	protein_coding	1.67408	3.55972	0.000371253	0.00439099	255	224	180	168	431	536	736	8.31185	8.15677	8.14573	7.77252	8.87633	8.66022	8.85567
ENSMUSG00000024440	53601	Pcdh12	protocadherin 12	protein_coding	2.40729	3.55825	0.00037334	0.00440906	59	26	25	46	134	142	169	6.51609	5.71991	5.87434	6.25776	7.34735	6.96331	6.96414
ENSMUSG00000034620	216395	Rxylt1	ribitol xylosyltransferase 1	protein_coding	1.98148	3.55823	0.000373356	0.00440906	222	329	176	320	691	625	1205	8.12837	8.67103	8.11614	8.62331	9.52811	8.86917	9.53626
ENSMUSG00000039699	74481	Batf2	basic leucine zipper transcription factor, ATF-like 2	protein_coding	5.92565	3.55695	0.000375192	0.00442391	58	22	23	32	565	78	141	6.49751	5.57693	5.79807	5.90133	9.24858	6.29865	6.75475
ENSMUSG00000032388	27965	Spg21	SPG21, maspardin	protein_coding	1.44324	3.55519	0.000377707	0.00445186	1377	1067	1002	1219	1995	2775	3543	10.6493	10.3057	10.5145	10.4836	11.0251	10.9583	11.0594
ENSMUSG00000028776	94242	Tinagl1	tubulointerstitial nephritis antigen-like 1	protein_coding	2.46843	3.55478	0.000378299	0.00445541	1394	448	777	1104	3396	3029	4538	10.6667	9.09283	10.1548	10.3433	11.7852	11.0831	11.4127
ENSMUSG00000045362	244237	Tnfrsf26	tumor necrosis factor receptor superfamily, member 26	protein_coding	3.96738	3.55181	0.000382587	0.00450072	51	32	28	29	329	150	101	6.35997	5.90836	5.98102	5.81072	8.51016	7.02797	6.38793
ENSMUSG00000038072	231050	Galnt11	polypeptide N-acetylgalactosaminyltransferase 11	protein_coding	2.29172	3.55092	0.000383888	0.00451429	62	126	102	83	294	265	501	6.57037	7.41862	7.41739	6.90665	8.35946	7.73054	8.33649
ENSMUSG00000020399	171285	Havcr2	hepatitis A virus cellular receptor 2	protein_coding	5.219	3.55039	0.000384657	0.00451986	23	15	16	32	301	64	87	5.60361	5.27829	5.4885	5.90133	8.39089	6.09804	6.23249
ENSMUSG00000020024	77048	Cep83	centrosomal protein 83	protein_coding	1.86694	3.54946	0.000386026	0.00453247	152	221	184	230	540	509	720	7.63836	8.13899	8.17472	8.18173	9.18604	8.59034	8.82568
ENSMUSG00000025492	66141	Ifitm3	interferon induced transmembrane protein 3	protein_coding	2.54895	3.54886	0.000386909	0.00453763	7247	3970	5006	6039	28254	14975	20199	13.0265	12.1799	12.815	12.7716	14.8326	13.3751	13.5563
ENSMUSG00000034394	16878	Lif	leukemia inhibitory factor	protein_coding	4.22286	3.54759	0.000388771	0.00455513	13	20	24	23	195	51	129	5.16834	5.49882	5.83676	5.60788	7.82058	5.88044	6.65447
ENSMUSG00000023078	55985	Cxcl13	chemokine (C-X-C motif) ligand 13	protein_coding	11.104	3.54753	0.000388865	0.00455513	49	14	113	95	2079	502	612	6.31801	5.22876	7.54539	7.06573	11.0839	8.57165	8.60508
ENSMUSG00000017776	12928	Crk	v-crk avian sarcoma virus CT10 oncogene homolog	protein_coding	1.7303	3.54734	0.000389144	0.00455513	881	1299	994	1013	2391	2514	4019	10.0177	10.5844	10.5031	10.2217	11.2834	10.8177	11.2392
ENSMUSG00000055541	52855	Lair1	leukocyte-associated Ig-like receptor 1	protein_coding	5.094	3.5466	0.000390234	0.00456439	87	18	61	63	745	148	337	6.95575	5.41541	6.80251	6.5936	9.6331	7.01208	7.81651
ENSMUSG00000027184	53872	Caprin1	cell cycle associated protein 1	protein_coding	1.60839	3.54624	0.000390776	0.00456899	994	1345	887	1076	2181	2479	3848	10.1878	10.6338	10.3418	10.307	11.1522	10.7978	11.1772
ENSMUSG00000085627		Gm11222	predicted gene 11222	processed_pseudogene	2.48212	3.54467	0.000393111	0.00459279	25	23	9	25	56	81	113	5.67475	5.61422	5.07183	5.67913	6.34622	6.33805	6.50848
ENSMUSG00000022504	12265	Ciita	class II transactivator	protein_coding	3.20554	3.54416	0.000393868	0.00459988	192	124	94	157	1012	337	598	7.93844	7.39877	7.31651	7.68594	10.0628	8.04164	8.57384
ENSMUSG00000075470	380959	Alg10b	asparagine-linked glycosylation 10B (alpha-1,2-glucosyltransferase)	protein_coding	1.70154	3.54273	0.00039601	0.00461951	333	457	324	383	834	858	1437	8.67036	9.12022	8.93667	8.86755	9.79101	9.30519	9.78236
ENSMUSG00000044092	319772	C130050O18Rik	RIKEN cDNA C130050O18 gene	protein_coding	5.52733	3.54263	0.000396152	0.00461951	17	7	9	17	180	47	54	5.36189	4.79955	5.07183	5.36573	7.7179	5.80557	5.77447
ENSMUSG00000000346	23994	Dazap2	DAZ associated protein 2	protein_coding	1.46031	3.54232	0.000396622	0.00462214	2873	3135	2385	2510	5096	6799	7481	11.6984	11.8414	11.751	11.5123	12.3673	12.2401	12.1286
ENSMUSG00000008730	15257	Hipk1	homeodomain interacting protein kinase 1	protein_coding	1.61301	3.54228	0.000396679	0.00462214	825	751	572	709	1676	1701	2107	9.92537	9.81111	9.72432	9.71996	10.777	10.2638	10.3213
ENSMUSG00000032038	20443	St3gal4	ST3 beta-galactoside alpha-2,3-sialyltransferase 4	protein_coding	2.10648	3.54115	0.000398388	0.00464029	347	272	234	337	1107	747	1017	8.72622	8.41478	8.49503	8.6934	10.1894	9.11379	9.30054
ENSMUSG00000060586	14969	H2-Eb1	histocompatibility 2, class II antigen E beta	protein_coding	3.44889	3.54062	0.000399193	0.00464614	6175	3587	2988	2808	31350	9418	16088	12.7963	12.0344	12.074	11.6729	14.9824	12.7081	13.2288
ENSMUSG00000100347		Gm7895	predicted gene 7895	processed_pseudogene	2.31783	3.53976	0.00040049	0.00465593	60	104	65	92	191	217	546	6.53442	7.18339	6.87572	7.0276	7.79391	7.47787	8.45149
ENSMUSG00000064224	450219	Gsdma3	gasdermin A3	protein_coding	2.67673	3.53907	0.000401542	0.00466284	27	22	14	16	40	97	135	5.74212	5.57693	5.38378	5.32019	6.00713	6.53103	6.70551
ENSMUSG00000101309		Gm29397	predicted gene 29397	processed_pseudogene	17.0539	3.53672	0.000405129	0.00469916	2	1	0	0	8	20	39	4.28421	4.11081	3.67762	3.67762	4.80725	5.13259	5.49754
ENSMUSG00000035310	231506	Lin54	lin-54 homolog (C. elegans)	protein_coding	1.77498	3.53588	0.000406422	0.00471238	108	123	76	151	229	324	450	7.21387	7.38874	7.0594	7.63641	8.02924	7.99023	8.19398
ENSMUSG00000042677	230738	Zc3h12a	zinc finger CCCH type containing 12A	protein_coding	2.96078	3.53524	0.000407409	0.00472203	1329	286	650	493	2342	3224	4638	10.5989	8.48207	9.90357	9.21448	11.2538	11.1721	11.4439
ENSMUSG00000032766	66066	Gng11	guanine nucleotide binding protein (G protein), gamma 11	protein_coding	1.58928	3.53418	0.000409038	0.00473554	656	481	488	618	1183	1541	1577	9.60428	9.19082	9.50256	9.52811	10.2831	10.1243	9.91281
ENSMUSG00000064267	74096	Hvcn1	hydrogen voltage-gated channel 1	protein_coding	2.5711	3.53392	0.000409447	0.00473848	158	111	110	116	637	341	444	7.68758	7.26253	7.5116	7.30726	9.41488	8.05709	8.17625
ENSMUSG00000024300	17916	Myo1f	myosin IF	protein_coding	3.81159	3.53378	0.000409663	0.0047392	297	66	214	168	1549	631	976	8.51589	6.65365	8.37532	7.77252	10.6651	8.88222	9.24358
ENSMUSG00000031530	319520	Dusp4	dual specificity phosphatase 4	protein_coding	2.17235	3.53165	0.000412972	0.00476488	39	38	23	32	74	102	185	6.08635	6.07317	5.79807	5.90133	6.64833	6.5862	7.07118
ENSMUSG00000042275	105083	Pelo	pelota mRNA surveillance and ribosome rescue factor	protein_coding	1.70668	3.5313	0.000413527	0.00476949	187	181	103	160	274	463	604	7.90419	7.87825	7.42951	7.71007	8.26569	8.46285	8.58731
ENSMUSG00000044103	215257	Il1f9	interleukin 1 family, member 9	protein_coding	3.96078	3.53007	0.000415444	0.0047862	1139	166	397	209	2300	2856	4151	10.3803	7.7668	9.21622	8.05576	11.228	10.9993	11.2854
ENSMUSG00000107770		Gm44126	predicted gene, 44126	processed_pseudogene	11.1426	3.52935	0.00041658	0.00479748	0	13	1	1	64	32	102	3.67762	5.17698	4.15842	4.10919	6.48868	5.47792	6.39839
ENSMUSG00000038264	20361	Sema7a	sema domain, immunoglobulin domain (Ig), and GPI membrane anchor, (semaphorin) 7A	protein_coding	2.70181	3.52878	0.000417474	0.00480597	485	297	221	441	1941	1188	1110	9.18489	8.53282	8.41836	9.06081	10.986	9.75865	9.42196
ENSMUSG00000028179	107869	Cth	cystathionase (cystathionine gamma-lyase)	protein_coding	2.63234	3.52834	0.000418172	0.00481039	39	69	26	25	125	139	253	6.08635	6.70353	5.91086	5.67913	7.26207	6.93828	7.45307
ENSMUSG00000004446	12122	Bid	BH3 interacting domain death agonist	protein_coding	2.30539	3.52812	0.000418521	0.00481092	106	63	80	85	338	237	319	7.19122	6.60191	7.12069	6.93444	8.54648	7.58862	7.74602
ENSMUSG00000023045	223920	Soat2	sterol O-acyltransferase 2	protein_coding	8.59693	3.52811	0.000418532	0.00481092	7	2	5	14	173	28	34	4.79285	4.28798	4.73396	5.22344	7.66735	5.37368	5.38959
ENSMUSG00000035775	66809	Krt20	keratin 20	protein_coding	3.29389	3.52689	0.000420471	0.00482673	5	11	11	17	33	62	91	4.6266	5.06559	5.20703	5.36573	5.82669	6.06679	6.27873
ENSMUSG00000084020		Wsb2-ps	WD repeat and SOCS box-containing 2, pseudogene	processed_pseudogene	3.44167	3.52677	0.000420662	0.00482673	10	9	3	8	35	36	53	4.9975	4.94129	4.50295	4.86873	5.88082	5.57395	5.75777
ENSMUSG00000046318	320924	Ccbe1	collagen and calcium binding EGF domains 1	protein_coding	2.85352	3.52649	0.000421109	0.00482967	68	39	40	75	312	170	222	6.67298	6.09876	6.33889	6.78967	8.43893	7.17777	7.29155
ENSMUSG00000036208	212547	Nepro	nucleolus and neural progenitor protein	protein_coding	1.72077	3.52487	0.000423698	0.00485573	82	117	71	99	182	261	342	6.88667	7.32704	6.97886	7.11501	7.73203	7.71111	7.83549
ENSMUSG00000044594	20248	Serpinb3a	serine (or cysteine) peptidase inhibitor, clade B (ovalbumin), member 3A	protein_coding	13.6806	3.52326	0.000426276	0.00487798	445	14	157	52	2358	2653	6760	9.06627	5.22876	7.9666	6.38584	11.2635	10.8943	11.9832
ENSMUSG00000040018	226139	Cox15	cytochrome c oxidase assembly protein 15	protein_coding	1.87942	3.52184	0.000428557	0.00490042	180	251	162	173	390	488	945	7.85482	8.30755	8.00749	7.81021	8.74012	8.53353	9.19897
ENSMUSG00000115448		Gm21178	predicted gene, 21178	processed_pseudogene	5.51554	3.52112	0.000429728	0.00490776	1	2	6	12	31	53	62	4.10811	4.28798	4.82993	5.11769	5.77022	5.91633	5.90086
ENSMUSG00000015932	56431	Dstn	destrin	protein_coding	1.88391	3.5206	0.000430573	0.00491248	5848	3298	3395	3313	7762	15202	14136	12.7181	11.914	12.2572	11.9097	12.9719	13.3968	13.0427
ENSMUSG00000030082	53421	Sec61a1	Sec61 alpha 1 subunit (S. cerevisiae)	protein_coding	1.57533	3.51916	0.000432913	0.00493734	2832	2148	1686	2003	4237	6062	6247	11.6778	11.3005	11.255	11.19	12.1024	12.0755	11.8701
ENSMUSG00000021322	27052	Aoah	acyloxyacyl hydrolase	protein_coding	4.24054	3.51871	0.000433657	0.00494398	105	28	125	79	838	312	438	7.17975	5.78581	7.67308	6.84938	9.79772	7.94109	8.15829
ENSMUSG00000001029	15896	Icam2	intercellular adhesion molecule 2	protein_coding	2.60862	3.51731	0.000435938	0.0049663	255	91	104	200	703	555	684	8.31185	7.02356	7.44153	7.9982	9.55211	8.70744	8.75584
ENSMUSG00000102038		Gm12345	predicted gene 12345	processed_pseudogene	2.19901	3.51553	0.000438877	0.00499605	35	41	19	31	77	99	168	5.98126	6.14853	5.63055	5.87182	6.69287	6.55336	6.95718
ENSMUSG00000015659	321007	Serac1	serine active site containing 1	protein_coding	3.61923	3.51409	0.000441269	0.00501955	6	12	5	18	35	51	102	4.71362	5.1227	4.73396	5.40958	5.88082	5.88044	6.39839
ENSMUSG00000066152	20530	Slc31a2	solute carrier family 31, member 2	protein_coding	1.70607	3.51396	0.000441471	0.00501999	977	633	575	609	1529	1950	2309	10.1635	9.57203	9.73164	9.50767	10.6466	10.457	10.4508
ENSMUSG00000099377		Gm6159	predicted gene 6159	processed_pseudogene	3.45549	3.51267	0.000443628	0.00504255	17	9	7	7	47	37	85	5.36189	4.94129	4.91713	4.79554	6.16601	5.59685	6.20876
ENSMUSG00000022324	17181	Matn2	matrilin 2	protein_coding	1.89899	3.51258	0.000443784	0.00504255	288	422	323	348	619	967	1807	8.47454	9.01063	8.93244	8.737	9.37507	9.47126	10.1044
ENSMUSG00000042938		Gm14117	predicted gene 14117	processed_pseudogene	4.01818	3.51225	0.000444329	0.00504501	11	46	8	20	85	95	251	5.0575	6.26551	4.99734	5.49277	6.80514	6.50833	7.44319
ENSMUSG00000115759		Gm18787	predicted gene, 18787	transcribed_processed_pseudogene	4.3415	3.51148	0.000445622	0.00505678	9	8	9	9	75	23	78	4.93383	4.87298	5.07183	4.93682	6.66334	5.22903	6.1223
ENSMUSG00000044206	278180	Vsig4	V-set and immunoglobulin domain containing 4	protein_coding	3.10156	3.5101	0.000447947	0.0050748	29	13	43	46	89	171	276	5.80613	5.17698	6.41538	6.25776	6.85808	7.18486	7.56211
ENSMUSG00000044576	242915	Garem2	GRB2 associated regulator of MAPK1 subtype 2	protein_coding	9.4009	3.5084	0.000450809	0.00510534	3	0	2	2	28	34	13	4.41788	3.67762	4.3545	4.28573	5.68058	5.52687	4.77293
ENSMUSG00000029718	18542	Pcolce	procollagen C-endopeptidase enhancer protein	protein_coding	1.71754	3.50823	0.000451105	0.0051068	4128	2695	3286	3976	7729	8517	13637	12.2179	11.6248	12.2104	12.1713	12.9658	12.5636	12.9911
ENSMUSG00000066877	17974	Nck2	non-catalytic region of tyrosine kinase adaptor protein 2	protein_coding	1.60876	3.50744	0.000452441	0.00512003	317	229	206	272	418	756	887	8.60374	8.18591	8.3245	8.40472	8.83452	9.13029	9.1116
ENSMUSG00000050558	246313	Prokr2	prokineticin receptor 2	protein_coding	66.608	3.5071	0.000453016	0.00512465	0	0	0	0	28	22	1	3.67762	3.67762	3.67762	3.67762	5.68058	5.19779	3.98815
ENSMUSG00000038418	13653	Egr1	early growth response 1	protein_coding	2.00061	3.50697	0.000453237	0.00512525	1201	1374	627	669	2395	3086	3896	10.4553	10.6641	9.85299	9.63876	11.2858	11.1097	11.1949
ENSMUSG00000117416		Gm5064	predicted gene 5064	processed_pseudogene	1.91704	3.50638	0.000454252	0.00513484	66	88	78	62	187	203	306	6.63961	6.98397	7.09038	6.57594	7.76674	7.3949	7.69287
ENSMUSG00000004609	12489	Cd33	CD33 antigen	protein_coding	3.55063	3.5061	0.000454722	0.00513503	115	80	131	146	1018	342	431	7.29044	6.87262	7.73289	7.59378	10.0712	8.06093	8.13706
ENSMUSG00000087113		Gm11714	predicted gene 11714	processed_transcript	7.71539	3.50601	0.000454885	0.00513503	3	2	5	0	37	29	24	4.41788	4.28798	4.73396	3.67762	5.9328	5.4006	5.13861
ENSMUSG00000026502	78825	Desi2	desumoylating isopeptidase 2	protein_coding	1.51962	3.50597	0.000454939	0.00513503	321	331	267	327	569	692	1088	8.62069	8.67924	8.67307	8.65259	9.25834	9.00861	9.39415
ENSMUSG00000025040	72018	Fundc1	FUN14 domain containing 1	protein_coding	1.55719	3.50451	0.000457453	0.00516103	319	355	250	297	627	693	996	8.61224	8.7743	8.5841	8.5227	9.3929	9.01059	9.27165
ENSMUSG00000018774	12514	Cd68	CD68 antigen	protein_coding	2.41771	3.50437	0.000457696	0.00516103	1252	436	1063	1025	3303	3465	4323	10.5143	9.05547	10.5983	10.2383	11.7455	11.275	11.3433
ENSMUSG00000026723	13434	Trdmt1	tRNA aspartic acid methyltransferase 1	protein_coding	1.96124	3.50372	0.000458808	0.00516728	45	58	49	40	103	150	222	6.23002	6.51117	6.55672	6.1164	7.02913	7.02797	7.29155
ENSMUSG00000042099	80880	Kank3	KN motif and ankyrin repeat domains 3	protein_coding	1.69252	3.50308	0.000459906	0.00517775	445	356	236	290	631	904	1240	9.06627	8.77813	8.50647	8.49063	9.40173	9.37762	9.57619
ENSMUSG00000060671	54667	Atp8b2	ATPase, class I, type 8B, member 2	protein_coding	1.59107	3.50277	0.000460438	0.00518183	436	475	402	490	927	978	1630	9.03818	9.17349	9.23352	9.20604	9.9394	9.487	9.95927
ENSMUSG00000029201	22235	Ugdh	UDP-glucose dehydrogenase	protein_coding	1.76663	3.50248	0.000460941	0.00518532	430	521	417	610	1247	1120	1854	9.01915	9.30131	9.28421	9.50996	10.3576	9.67617	10.1406
ENSMUSG00000052821	58861	Cysltr1	cysteinyl leukotriene receptor 1	protein_coding	2.29365	3.50204	0.000461713	0.00519046	91	62	75	58	264	181	342	7.00868	6.58423	7.04366	6.503	8.2164	7.25389	7.83549
ENSMUSG00000027859	18049	Ngf	nerve growth factor	protein_coding	3.61277	3.50181	0.000462103	0.00519294	44	34	17	42	267	155	99	6.20711	5.9656	5.53768	6.16518	8.23137	7.06693	6.36678
ENSMUSG00000028656	12331	Cap1	CAP, adenylate cyclase-associated protein 1 (yeast)	protein_coding	1.7111	3.50042	0.000464533	0.00521642	3253	2096	1989	2678	6076	6910	7372	11.8763	11.2655	11.4912	11.605	12.6199	12.2634	12.1075
ENSMUSG00000027646	20779	Src	Rous sarcoma oncogene	protein_coding	1.53478	3.49931	0.000466471	0.00523434	553	567	400	460	1008	1292	1359	9.36652	9.41871	9.22662	9.11888	10.0573	9.87634	9.70422
ENSMUSG00000034024	12461	Cct2	chaperonin containing Tcp1, subunit 2 (beta)	protein_coding	1.45155	3.49588	0.000472495	0.00529012	3456	4314	2930	3410	6266	8590	10236	11.9631	12.2992	12.0459	11.9511	12.6641	12.5759	12.5787
ENSMUSG00000056671	77619	Prelid2	PRELI domain containing 2	protein_coding	2.56463	3.4958	0.00047265	0.00529012	59	37	82	49	220	267	219	6.51609	6.04707	7.15038	6.3233	7.97689	7.74016	7.2749
ENSMUSG00000022964	77975	Tmem50b	transmembrane protein 50B	protein_coding	2.05753	3.49552	0.000473138	0.00529365	967	490	401	461	1439	2086	2252	10.149	9.21643	9.23007	9.12187	10.5605	10.5526	10.4154
ENSMUSG00000027562	12349	Car2	carbonic anhydrase 2	protein_coding	2.82915	3.49538	0.000473393	0.00529458	39	85	32	54	248	261	161	6.08635	6.94323	6.11113	6.42601	8.13385	7.71111	6.90742
ENSMUSG00000072872	56353	Rybp	RING1 and YY1 binding protein	protein_coding	3.47151	3.49467	0.000474655	0.00530556	9	31	6	23	68	85	140	4.93383	5.87878	4.82993	5.60788	6.55476	6.38888	6.74666
ENSMUSG00000032434	67213	Cmtm6	CKLF-like MARVEL transmembrane domain containing 6	protein_coding	1.56805	3.49335	0.000477006	0.00532914	1755	1173	1219	1447	2791	3660	4239	10.9943	10.4397	10.7928	10.7269	11.5044	11.3532	11.3153
ENSMUSG00000022831	15163	Hcls1	hematopoietic cell specific Lyn substrate 1	protein_coding	3.60625	3.49206	0.00047931	0.00534709	910	428	542	643	5631	1802	2010	10.0633	9.03002	9.64898	9.58341	12.5106	10.3453	10.2546
ENSMUSG00000046223	18793	Plaur	plasminogen activator, urokinase receptor	protein_coding	8.89912	3.4915	0.000480309	0.00535239	270	217	220	340	6759	1579	648	8.38808	8.11495	8.41229	8.70542	12.773	10.1587	8.68243
ENSMUSG00000025498	54123	Irf7	interferon regulatory factor 7	protein_coding	3.66763	3.48987	0.000483255	0.0053813	1045	247	605	602	4912	1599	3676	10.2585	8.28618	9.80289	9.49157	12.3145	10.1764	11.1119
ENSMUSG00000046519	229593	Golph3l	golgi phosphoprotein 3-like	protein_coding	2.3957	3.48965	0.000483662	0.00538388	78	148	115	95	409	270	588	6.82886	7.6205	7.56748	7.06573	8.80484	7.75447	8.55111
ENSMUSG00000028790	20218	Khdrbs1	KH domain containing, RNA binding, signal transduction associated 1	protein_coding	1.4825	3.48876	0.00048527	0.00539982	1120	1474	1037	1198	2125	2922	3804	10.3565	10.7639	10.5632	10.459	11.1151	11.0318	11.1608
ENSMUSG00000113936		Gm8784	predicted gene 8784	processed_pseudogene	2.81589	3.48739	0.000487757	0.00542552	31	9	15	23	73	82	111	5.86714	4.94129	5.43727	5.60788	6.63317	6.35094	6.48911
ENSMUSG00000026271	64095	Gpr35	G protein-coupled receptor 35	protein_coding	4.77941	3.48695	0.000488559	0.00543062	223	25	39	71	809	381	695	8.13429	5.68565	6.31241	6.72732	9.74837	8.20313	8.77754
ENSMUSG00000044377		Gm13080	predicted gene 13080	processed_pseudogene	2.7056	3.48695	0.00048857	0.00543062	12	17	11	15	54	46	80	5.11432	5.37144	5.20703	5.27283	6.30818	5.78616	6.14757
ENSMUSG00000023452	320951	Pisd	phosphatidylserine decarboxylase	protein_coding	1.58808	3.48527	0.00049165	0.00545299	458	383	363	469	934	973	1295	9.1059	8.87782	9.09272	9.14558	9.94998	9.47987	9.63678
ENSMUSG00000024165	52009	Jpt2	Jupiter microtubule associated homolog 2	protein_coding	1.57914	3.48487	0.000492372	0.00545903	474	441	291	347	723	1122	1145	9.15323	9.07115	8.78998	8.73309	9.59124	9.67866	9.46513
ENSMUSG00000035186	24108	Ubd	ubiquitin D	protein_coding	30.6414	3.48371	0.000494514	0.00547879	59	6	14	33	2788	58	231	6.51609	4.71989	5.38378	5.9302	11.5029	6.00201	7.34036
ENSMUSG00000045827	20723	Serpinb9	serine (or cysteine) peptidase inhibitor, clade B, member 9	protein_coding	2.89269	3.48239	0.000496964	0.00549602	79	68	92	81	484	191	375	6.84354	6.6871	7.29013	6.8783	9.03523	7.31972	7.95482
ENSMUSG00000047804	56697	Akap10	A kinase (PRKA) anchor protein 10	protein_coding	1.88264	3.48147	0.000498661	0.00550755	185	143	82	186	363	450	527	7.89026	7.57706	7.15038	7.9038	8.64283	8.42468	8.40405
ENSMUSG00000044338	23796	Aplnr	apelin receptor	protein_coding	2.32355	3.48144	0.000498725	0.00550755	628	234	255	286	830	1601	1602	9.54343	8.21447	8.61084	8.47198	9.78427	10.1782	9.93491
ENSMUSG00000044952	622320	Kctd21	potassium channel tetramerisation domain containing 21	protein_coding	2.51621	3.48106	0.000499442	0.00551347	41	23	21	41	103	87	199	6.13595	5.61422	5.71705	6.14101	7.02913	6.41361	7.15863
ENSMUSG00000030159	56760	Clec1b	C-type lectin domain family 1, member b	protein_coding	5.71483	3.48094	0.000499652	0.0055138	5	3	5	1	38	24	31	4.6266	4.42245	4.73396	4.10919	5.95804	5.25944	5.31982
ENSMUSG00000033192	270084	Lpcat2	lysophosphatidylcholine acyltransferase 2	protein_coding	2.1067	3.47874	0.000503772	0.00555526	335	342	262	302	1182	900	884	8.67847	8.72359	8.64746	8.54518	10.2819	9.37147	9.10694
ENSMUSG00000025058	71398	5430427O19Rik	RIKEN cDNA 5430427O19 gene	protein_coding	4.90956	3.47859	0.00050405	0.00555634	14	6	10	17	140	37	68	5.21987	4.71989	5.14149	5.36573	7.40149	5.59685	5.98827
ENSMUSG00000031149	54637	Praf2	PRA1 domain family 2	protein_coding	1.78705	3.47625	0.000508479	0.00559912	139	138	90	170	330	413	395	7.52553	7.53226	7.26326	7.78771	8.51424	8.31013	8.02259
ENSMUSG00000032899	243659	Styk1	serine/threonine/tyrosine kinase 1	protein_coding	2.38829	3.47444	0.000511923	0.00563501	43	20	21	22	83	100	124	6.1838	5.49882	5.71705	5.57068	6.77791	6.56439	6.61047
ENSMUSG00000058581		Gm5801	predicted pseudogene 5801	processed_pseudogene	1.6763	3.47383	0.000513091	0.00564584	110	94	69	111	201	287	291	7.23617	7.06208	6.94531	7.25336	7.85968	7.83295	7.62898
ENSMUSG00000021028	217588	Mbip	MAP3K12 binding inhibitory protein 1	protein_coding	1.76269	3.47225	0.00051611	0.00567499	79	110	92	113	236	274	334	6.84354	7.25149	7.29013	7.27517	8.06867	7.77333	7.805
ENSMUSG00000021457	20963	Syk	spleen tyrosine kinase	protein_coding	2.66177	3.47215	0.000516306	0.00567511	523	360	313	537	2399	1295	1307	9.28919	8.79334	8.88941	9.33281	11.2881	9.8796	9.64966
ENSMUSG00000020717	18613	Pecam1	platelet/endothelial cell adhesion molecule 1	protein_coding	2.06244	3.4716	0.000517359	0.00568464	3297	1363	1769	2380	6347	7016	8340	11.8955	10.6526	11.3236	11.4363	12.6826	12.2852	12.2845
ENSMUSG00000033308	99586	Dpyd	dihydropyrimidine dehydrogenase	protein_coding	2.59055	3.47134	0.000517873	0.00568825	42	34	19	45	98	96	262	6.16009	5.9656	5.63055	6.2352	6.97039	6.51972	7.49674
ENSMUSG00000004098	53867	Col5a3	collagen, type V, alpha 3	protein_coding	2.29281	3.4705	0.000519483	0.00570185	1302	573	703	1489	2739	3024	5776	10.5698	9.43334	10.0138	10.7676	11.4775	11.0807	11.7578
ENSMUSG00000022529	74120	Zfp263	zinc finger protein 263	protein_coding	1.85105	3.46962	0.000521187	0.00571645	146	164	141	225	436	406	676	7.58739	7.75126	7.82734	8.15273	8.89209	8.28739	8.73984
ENSMUSG00000082070		Gm1866	predicted gene 1866	processed_pseudogene	5.20911	3.46951	0.000521412	0.00571688	6	2	7	1	25	33	48	4.71362	4.28798	4.91713	4.10919	5.58416	5.50264	5.67085
ENSMUSG00000028111	13038	Ctsk	cathepsin K	protein_coding	2.14322	3.46923	0.000521947	0.00572069	3947	1605	1899	3499	6253	9288	13649	12.1536	10.885	11.425	11.988	12.6612	12.6881	12.9923
ENSMUSG00000091408		Gm6728	predicted gene 6728	processed_pseudogene	2.64345	3.46902	0.000522361	0.00572318	18	15	8	14	39	54	88	5.40566	5.27829	4.99734	5.22344	5.98281	5.93391	6.2442
ENSMUSG00000020946	56494	Gosr2	golgi SNAP receptor complex member 2	protein_coding	1.46589	3.46629	0.000527691	0.00577745	1221	1055	795	1165	1995	2401	3135	10.4787	10.2897	10.1871	10.4194	11.0251	10.7523	10.8851
ENSMUSG00000029787	78937	Avl9	AVL9 cell migration associated	protein_coding	1.8456	3.46421	0.000531795	0.00581615	96	117	72	109	257	233	386	7.07217	7.32704	6.99534	7.23122	8.18087	7.56715	7.99249
ENSMUSG00000021709	59079	Erbin	Erbb2 interacting protein	protein_coding	1.71794	3.46318	0.000533835	0.00583548	769	1055	652	701	1441	2072	3377	9.82669	10.2897	9.90789	9.70408	10.5625	10.5431	10.991
ENSMUSG00000036867	17130	Smad6	SMAD family member 6	protein_coding	1.83558	3.46259	0.000535009	0.00584505	87	129	68	114	237	263	387	6.95575	7.44789	6.92823	7.28594	8.07422	7.72086	7.99586
ENSMUSG00000034911	234395	Ushbp1	USH1 protein network component harmonin binding protein 1	protein_coding	1.56965	3.46202	0.000536146	0.00585538	327	265	198	328	505	701	955	8.64574	8.37991	8.27182	8.65672	9.09365	9.02636	9.21351
ENSMUSG00000118140		Gm4949	predicted gene 4949	processed_pseudogene	3.69196	3.46187	0.000536429	0.00585638	8	10	3	9	33	30	74	4.86588	5.00528	4.50295	4.93682	5.82669	5.42692	6.07028
ENSMUSG00000071035		Gm5499	predicted pseudogene 5499	processed_pseudogene	2.67387	3.46031	0.000539562	0.0058864	12	34	21	19	64	87	139	5.11432	5.9656	5.71705	5.45189	6.48868	6.41361	6.73853
ENSMUSG00000029924	72144	Slc37a3	solute carrier family 37 (glycerol-3-phosphate transporter), member 3	protein_coding	1.56514	3.45915	0.00054189	0.00590548	323	411	261	296	626	813	1035	8.62909	8.9744	8.64229	8.51816	9.39068	9.23063	9.32485
ENSMUSG00000094568		Smarce1-ps1	SWI/SNF related, matrix associated, actin dependent regulator of chromatin, subfamily e, member 1, pseodogene 1	processed_pseudogene	1.81757	3.45656	0.000547126	0.00595619	137	115	69	85	200	329	381	7.50735	7.30586	6.94531	6.93444	7.85324	8.01022	7.97549
ENSMUSG00000066684	170741	Pilrb1	paired immunoglobin-like type 2 receptor beta 1	protein_coding	5.86356	3.45425	0.000551831	0.00600315	14	9	9	4	138	29	53	5.21987	4.94129	5.07183	4.53147	7.38367	5.4006	5.75777
ENSMUSG00000018796	14081	Acsl1	acyl-CoA synthetase long-chain family member 1	protein_coding	1.96461	3.4536	0.000553158	0.00601331	1851	2236	1614	2214	3641	4800	11727	11.0702	11.3579	11.1927	11.333	11.885	11.741	12.7741
ENSMUSG00000026770	16184	Il2ra	interleukin 2 receptor, alpha chain	protein_coding	3.18711	3.45342	0.000553532	0.00601395	32	10	26	24	129	77	140	5.89661	5.00528	5.91086	5.644	7.3006	6.28526	6.74666
ENSMUSG00000040158	76281	Tax1bp3	Tax1 (human T cell leukemia virus type I) binding protein 3	protein_coding	2.00271	3.45338	0.000553609	0.00601395	98	51	57	74	134	274	296	7.09679	6.37324	6.72528	6.77434	7.34735	7.77333	7.6506
ENSMUSG00000027884	229725	Clcc1	chloride channel CLIC-like 1	protein_coding	1.61198	3.45317	0.000554045	0.00601655	397	484	391	474	952	969	1517	8.90971	9.19941	9.19518	9.16021	9.97682	9.47413	9.85834
ENSMUSG00000028189	74245	Ctbs	chitobiase	protein_coding	2.08742	3.45262	0.000555171	0.00602237	68	59	70	82	221	169	315	6.67298	6.5298	6.96218	6.89255	7.9828	7.17065	7.72988
ENSMUSG00000085401		Slc39a1-ps	solute carrier family 39 (zinc transporter), member 1, pseudogene	processed_pseudogene	7.44508	3.45215	0.000556132	0.00603067	6	1	0	15	43	58	98	4.71362	4.11081	3.67762	5.27283	6.07754	6.00201	6.35608
ENSMUSG00000032089	16154	Il10ra	interleukin 10 receptor, alpha	protein_coding	3.17584	3.4503	0.000559963	0.00606792	356	153	227	280	1827	780	851	8.76102	7.66266	8.45425	8.44354	10.8998	9.17339	9.05458
ENSMUSG00000042063	56220	Zfp386	zinc finger protein 386 (Kruppel-like)	protein_coding	2.33544	3.44783	0.000565103	0.00611496	60	147	98	100	282	292	621	6.53442	7.61192	7.36784	7.12707	8.30393	7.85524	8.62481
ENSMUSG00000030165	16643	Klrd1	killer cell lectin-like receptor, subfamily D, member 1	protein_coding	3.76095	3.44704	0.000566761	0.00613074	12	15	14	10	105	52	55	5.11432	5.27829	5.38378	5.00063	7.05196	5.8985	5.79095
ENSMUSG00000037174	69257	Elf2	E74-like factor 2	protein_coding	1.50104	3.4467	0.000567489	0.00613645	494	573	477	630	967	1261	1824	9.21028	9.43334	9.47082	9.55492	9.99881	9.84225	10.1176
ENSMUSG00000060594	244864	Layn	layilin	protein_coding	2.50542	3.44654	0.000567818	0.00613784	79	40	54	78	268	160	309	6.84354	6.12388	6.66443	6.83469	8.23632	7.10485	7.70531
ENSMUSG00000018899	16362	Irf1	interferon regulatory factor 1	protein_coding	3.34205	3.44564	0.000569699	0.00615383	950	521	717	862	6189	2177	2347	10.124	9.30131	10.0415	9.99418	12.6464	10.6132	10.474
ENSMUSG00000021892	24056	Sh3bp5	SH3-domain binding protein 5 (BTK-associated)	protein_coding	1.59013	3.44467	0.000571761	0.00616757	669	551	475	536	1183	1224	1922	9.63169	9.37895	9.46497	9.33023	10.2831	9.80049	10.1914
ENSMUSG00000074115	20208	Saa1	serum amyloid A 1	protein_coding	9.15364	3.4446	0.000571895	0.00616757	88	8	58	108	1380	416	783	6.96917	4.87298	6.74499	7.22002	10.5012	8.31977	8.94031
ENSMUSG00000020400	57783	Tnip1	TNFAIP3 interacting protein 1	protein_coding	2.32374	3.4444	0.000572323	0.00616913	808	711	525	748	3149	1584	2530	9.89612	9.73443	9.60446	9.79496	11.6771	10.1631	10.5804
ENSMUSG00000057561	13664	Eif1a	eukaryotic translation initiation factor 1A	protein_coding	1.80846	3.44381	0.000573584	0.00618054	667	538	536	782	1744	1454	2229	9.6275	9.34582	9.63342	9.85731	10.8336	10.0424	10.4009
ENSMUSG00000040128	108767	Pnrc1	proline-rich nuclear receptor coactivator 1	protein_coding	1.96316	3.44309	0.000575117	0.00619271	1151	1384	1122	1486	4348	3018	4348	10.3951	10.6744	10.675	10.7647	12.1395	11.0779	11.3516
ENSMUSG00000023903	240047	Mmp25	matrix metallopeptidase 25	protein_coding	5.1057	3.44246	0.000576456	0.00620495	33	27	19	12	313	78	77	5.92543	5.75328	5.63055	5.11769	8.44322	6.29865	6.10948
ENSMUSG00000009630	19053	Ppp2cb	protein phosphatase 2 (formerly 2A), catalytic subunit, beta isoform	protein_coding	1.48248	3.44042	0.000580822	0.00624275	1011	1079	724	991	1900	2260	2612	10.2118	10.3215	10.0552	10.1907	10.9556	10.6663	10.6257
ENSMUSG00000102270		Gm8388	predicted gene 8388	processed_pseudogene	42.3103	3.44039	0.000580869	0.00624275	0	0	0	0	11	4	24	3.67762	3.67762	3.67762	3.67762	4.99055	4.35012	5.13861
ENSMUSG00000060063	11690	Alox5ap	arachidonate 5-lipoxygenase activating protein	protein_coding	3.12139	3.44024	0.00058119	0.00624275	870	426	697	741	4909	2039	2238	10.0001	9.02359	10.0017	9.78178	12.3136	10.5203	10.4066
ENSMUSG00000053654	68239	Krt42	keratin 42	protein_coding	3.05735	3.43911	0.000583633	0.00626679	10	26	20	30	113	72	124	4.9975	5.71991	5.67453	5.84162	7.13977	6.21627	6.61047
ENSMUSG00000013663	19211	Pten	phosphatase and tensin homolog	protein_coding	1.58432	3.43713	0.000587906	0.00630478	672	864	582	739	1436	1579	2548	9.63794	10.008	9.74859	9.778	10.5576	10.1587	10.5905
ENSMUSG00000026111	67387	Unc50	unc-50 homolog	protein_coding	1.36781	3.43709	0.000587994	0.00630478	791	738	672	823	1167	1813	2159	9.86627	9.78663	9.95035	9.92907	10.2639	10.3539	10.3557
ENSMUSG00000046743	329628	Fat4	FAT atypical cadherin 4	protein_coding	2.03837	3.43663	0.00058901	0.00631307	62	44	45	39	100	146	246	6.57037	6.21992	6.46412	6.09134	6.99418	6.99601	7.41817
ENSMUSG00000033031	224171	Cip2a	cell proliferation regulating inhibitor of protein phosphatase 2A	protein_coding	1.71304	3.43456	0.000593527	0.006353	105	104	79	72	174	277	313	7.17975	7.18339	7.10562	6.74317	7.67468	7.78731	7.72173
ENSMUSG00000024218	68776	Taf11	TATA-box binding protein associated factor 11	protein_coding	1.42835	3.43342	0.000596013	0.00637293	525	505	351	481	796	1175	1273	9.29448	9.25812	9.04648	9.18044	9.72569	9.74325	9.61284
ENSMUSG00000030161	57436	Gabarapl1	gamma-aminobutyric acid (GABA) A receptor-associated protein-like 1	protein_coding	1.65274	3.43266	0.000597701	0.00638652	1637	1148	985	1481	2330	3251	5288	10.8952	10.4092	10.4902	10.7599	11.2465	11.184	11.6315
ENSMUSG00000043931	231932	Gimap7	GTPase, IMAP family member 7	protein_coding	14.0918	3.43223	0.00059863	0.00639422	3	3	0	1	69	8	19	4.41788	4.42245	3.67762	4.10919	6.57079	4.62045	4.98827
ENSMUSG00000048709		Gm8666	predicted gene 8666	processed_pseudogene	2.14265	3.43178	0.000599635	0.00640273	115	142	70	71	187	459	424	7.29044	7.56821	6.96218	6.72732	7.76674	8.45121	8.1155
ENSMUSG00000050953	14609	Gja1	gap junction protein, alpha 1	protein_coding	1.68459	3.431	0.000601356	0.00641662	4389	4281	2876	2708	6573	11372	11729	12.3059	12.2882	12.0192	11.621	12.7329	12.9792	12.7744
ENSMUSG00000016087	14247	Fli1	Friend leukemia integration 1	protein_coding	1.77062	3.43063	0.000602175	0.00642313	174	147	143	162	429	403	482	7.81111	7.61192	7.8455	7.72594	8.86997	8.27754	8.28504
ENSMUSG00000062846		Gm14176	predicted gene 14176	processed_pseudogene	1.94682	3.42942	0.000604871	0.00644964	223	123	123	126	285	582	581	8.13429	7.38874	7.65257	7.40929	8.31802	8.77199	8.53497
ENSMUSG00000017830	80861	Dhx58	DEXH (Asp-Glu-X-His) box polypeptide 58	protein_coding	3.45361	3.42873	0.000606409	0.00646379	247	56	103	97	861	406	674	8.26947	6.47315	7.42951	7.09058	9.83569	8.28739	8.73582
ENSMUSG00000028599	21938	Tnfrsf1b	tumor necrosis factor receptor superfamily, member 1b	protein_coding	3.39119	3.42764	0.000608844	0.00648749	702	242	439	489	3687	1427	1661	9.699	8.25902	9.35547	9.20322	11.903	10.016	9.98577
ENSMUSG00000028073	73182	Pear1	platelet endothelial aggregation receptor 1	protein_coding	1.98348	3.42748	0.000609209	0.00648912	305	198	182	275	774	595	851	8.55168	7.9949	8.1603	8.4194	9.68647	8.80207	9.05458
ENSMUSG00000074886	26385	Grk6	G protein-coupled receptor kinase 6	protein_coding	1.68781	3.42706	0.000610145	0.00649458	941	776	456	668	1498	2088	2171	10.1105	9.85705	9.40822	9.63667	10.6175	10.554	10.3636
ENSMUSG00000029250	231329	Polr2b	polymerase (RNA) II (DNA directed) polypeptide B	protein_coding	1.47713	3.4267	0.000610966	0.0064988	807	733	662	666	1159	1744	2420	9.89438	9.77711	9.92927	9.63248	10.2542	10.299	10.5174
ENSMUSG00000044258	13024	Ctla2a	cytotoxic T lymphocyte-associated protein 2 alpha	protein_coding	2.92008	3.4257	0.000613216	0.00651737	1638	643	716	985	5881	3896	2805	10.8961	9.5939	10.0396	10.1821	12.573	11.4425	10.7269
ENSMUSG00000078122		F630028O10Rik	RIKEN cDNA F630028O10 gene	antisense	4.50302	3.42552	0.000613617	0.00651795	29	25	14	24	268	63	89	5.80613	5.68565	5.38378	5.644	8.23632	6.0825	6.2558
ENSMUSG00000022108	16432	Itm2b	integral membrane protein 2B	protein_coding	1.50401	3.42503	0.000614724	0.00652744	21014	16390	14292	14936	27639	43264	53969	14.5595	14.2195	14.3252	14.0748	14.8008	14.9035	14.9723
ENSMUSG00000038828	68796	Tmem214	transmembrane protein 214	protein_coding	1.53248	3.42465	0.000615581	0.00653202	886	777	662	832	1695	1736	2397	10.0257	9.85886	9.92927	9.94436	10.7931	10.2925	10.5038
ENSMUSG00000041849	239319	Card6	caspase recruitment domain family, member 6	protein_coding	1.92092	3.42345	0.000618309	0.00655416	57	59	44	58	161	152	183	6.47868	6.5298	6.43996	6.503	7.57629	7.04369	7.05824
ENSMUSG00000004473	20256	Clec11a	C-type lectin domain family 11, member a	protein_coding	1.95793	3.42294	0.000619473	0.00656423	230	120	176	181	329	600	846	8.17505	7.35822	8.11614	7.86852	8.51016	8.81347	9.04648
ENSMUSG00000066756	232925	Igfl3	IGF-like family member 3	protein_coding	2.81933	3.42163	0.00062246	0.00658449	68	29	30	37	153	266	122	6.67298	5.81754	6.04765	6.03975	7.5122	7.73536	6.59248
ENSMUSG00000021987	219135	Mtmr6	myotubularin related protein 6	protein_coding	1.87419	3.42143	0.000622918	0.00658706	404	629	508	536	1419	1214	2100	8.93363	9.56319	9.55854	9.33023	10.5407	9.78899	10.3166
ENSMUSG00000024827	104174	Gldc	glycine decarboxylase	protein_coding	2.60457	3.42032	0.000625475	0.00660507	44	65	42	63	266	133	234	6.20711	6.63661	6.39035	6.5936	8.2264	6.88685	7.35626
ENSMUSG00000030103	20893	Bhlhe40	basic helix-loop-helix family, member e40	protein_coding	1.55109	3.42032	0.000625482	0.00660507	1875	2020	1714	2413	4353	4733	5872	11.0886	11.2128	11.2785	11.456	12.1411	11.7209	11.7814
ENSMUSG00000020671	19325	Rab10	RAB10, member RAS oncogene family	protein_coding	1.43125	3.41885	0.000628869	0.00663855	2984	2512	2320	2663	3973	6397	8487	11.7527	11.5242	11.7114	11.597	12.0101	12.1527	12.3096
ENSMUSG00000024785	59028	Rcl1	RNA terminal phosphate cyclase-like 1	protein_coding	1.54973	3.41712	0.000632883	0.00667631	386	277	280	388	584	918	1048	8.8713	8.43917	8.73757	8.88527	9.29436	9.39896	9.34216
ENSMUSG00000043716	19989	Rpl7	ribosomal protein L7	protein_coding	1.42163	3.4159	0.000635713	0.00670156	7438	7611	5584	6085	11821	16141	18384	13.0639	13.1151	12.9721	12.7825	13.5772	13.4831	13.4208
ENSMUSG00000073599	68545	Ecscr	endothelial cell surface expressed chemotaxis and apoptosis regulator	protein_coding	2.53845	3.41518	0.000637397	0.006717	534	194	398	353	1655	1166	1556	9.31803	7.96829	9.21969	8.75639	10.7591	9.73248	9.89398
ENSMUSG00000055805	57778	Fmnl1	formin-like 1	protein_coding	2.6606	3.41386	0.000640504	0.00674742	437	249	273	315	1778	929	1000	9.04133	8.2969	8.7032	8.60203	10.8611	9.41551	9.2772
ENSMUSG00000043939	328830	A530064D06Rik	RIKEN cDNA A530064D06 gene	protein_coding	10.6564	3.41135	0.000646415	0.00680501	4	0	7	12	181	28	35	4.52938	3.67762	4.91713	5.11769	7.72498	5.37368	5.41196
ENSMUSG00000037849	102639543	Ifi206	interferon activated gene 206	protein_coding	5.99409	3.41099	0.000647286	0.00681184	48	6	7	8	224	88	125	6.29654	4.71989	4.91713	4.86873	8.00039	6.42581	6.61939
ENSMUSG00000083836		Ldha-ps2	lactate dehydrogenase A, pseudogene 2	processed_pseudogene	2.23083	3.41005	0.00064951	0.00683086	117	61	106	131	309	277	563	7.31158	6.56632	7.46527	7.4577	8.42599	7.78731	8.49264
ENSMUSG00000048163	20345	Selplg	selectin, platelet (p-selectin) ligand	protein_coding	3.29952	3.41004	0.000649539	0.00683086	471	205	271	286	2388	930	984	9.14447	8.0403	8.69322	8.47198	11.2816	9.41701	9.25487
ENSMUSG00000079685	77777	Ulbp1	UL16 binding protein 1	protein_coding	2.23442	3.40964	0.000650482	0.00683609	34	34	36	38	113	88	189	5.95364	5.9656	6.22977	6.06579	7.13977	6.42581	7.09672
ENSMUSG00000021366	110521	Hivep1	human immunodeficiency virus type I enhancer binding protein 1	protein_coding	1.80589	3.40941	0.000651044	0.00683965	185	249	224	247	483	541	1038	7.89026	8.2969	8.43642	8.27619	9.03239	8.6728	9.32887
ENSMUSG00000029634	74132	Rnf6	ring finger protein (C3H2C3 type) 6	protein_coding	1.61019	3.40893	0.000652175	0.00684449	437	486	351	399	810	919	1622	9.04133	9.2051	9.04648	8.92351	9.7501	9.40047	9.95235
ENSMUSG00000092193		Cd9-ps	Cd9 antigen, pseudogene	processed_pseudogene	3.90483	3.4088	0.000652481	0.00684533	7	28	4	12	51	72	124	4.79285	5.78581	4.62649	5.11769	6.24906	6.21627	6.61047
ENSMUSG00000028641	56401	P3h1	prolyl 3-hydroxylase 1	protein_coding	1.87686	3.4073	0.000656095	0.00686979	462	266	363	442	1062	1033	1355	9.11788	8.38495	9.09272	9.06393	10.1308	9.56324	9.70009
ENSMUSG00000051000	229488	Fam160a1	family with sequence similarity 160, member A1	protein_coding	1.64744	3.40625	0.00065861	0.0068868	600	453	349	447	727	1362	1751	9.4799	9.10811	9.03863	9.0794	9.59894	9.95047	10.06
ENSMUSG00000094345		Igkv14-126	immunoglobulin kappa variable 14-126	IG_V_gene	953.118	3.40466	0.000662471	0.00691937	0	0	1	14	12193	11	4	3.67762	3.67762	4.15842	5.22344	13.6218	4.77623	4.29516
ENSMUSG00000081219		Bambi-ps1	BMP and activin membrane-bound inhibitor, pseudogene (Xenopus laevis)	processed_pseudogene	3.74712	3.40284	0.000666898	0.00695612	9	14	2	17	54	74	54	4.93383	5.22876	4.3545	5.36573	6.30818	6.24429	5.77447
ENSMUSG00000047996	546336	Prrg1	proline rich Gla (G-carboxyglutamic acid) 1	protein_coding	2.35143	3.40249	0.000667746	0.00696037	25	26	27	37	90	76	169	5.67475	5.71991	5.94641	6.03975	6.87101	6.27174	6.96414
ENSMUSG00000012114	94112	Med15	mediator complex subunit 15	protein_coding	1.48808	3.40249	0.00066776	0.00696037	627	569	514	647	1163	1546	1521	9.54121	9.4236	9.57491	9.59206	10.259	10.1289	9.86204
ENSMUSG00000044017	243277	Adgrd1	adhesion G protein-coupled receptor D1	protein_coding	1.61526	3.40138	0.000670476	0.00698393	539	410	436	607	1024	1179	1751	9.33095	8.97106	9.34595	9.50309	10.0795	9.748	10.06
ENSMUSG00000037465	21847	Klf10	Kruppel-like factor 10	protein_coding	1.46936	3.40077	0.000671961	0.00699703	1264	1044	817	1087	2029	2416	3040	10.5278	10.2749	10.2257	10.3213	11.0492	10.7612	10.8413
ENSMUSG00000039361	233489	Picalm	phosphatidylinositol binding clathrin assembly protein	protein_coding	2.0329	3.39816	0.000678406	0.0070557	1630	1721	1376	2048	6120	3835	5861	10.8891	10.9844	10.9653	11.2217	12.6303	11.4199	11.7787
ENSMUSG00000022893	11504	Adamts1	a disintegrin-like and metallopeptidase (reprolysin type) with thrombospondin type 1 motif, 1	protein_coding	2.05052	3.39593	0.000683967	0.00710755	509	454	562	669	1868	1255	2221	9.25164	9.11115	9.69964	9.63876	10.9314	9.83556	10.3958
ENSMUSG00000029009	17769	Mthfr	methylenetetrahydrofolate reductase	protein_coding	1.73232	3.39469	0.00068707	0.00713738	221	181	167	178	473	426	660	8.12243	7.87825	8.04724	7.84693	9.00366	8.35142	8.70732
ENSMUSG00000039182	105351	AW209491	expressed sequence AW209491	protein_coding	1.79423	3.39175	0.000694468	0.0072069	92	99	82	134	204	264	446	7.02161	7.12403	7.15038	7.48597	7.87884	7.72571	8.18218
ENSMUSG00000035042	20304	Ccl5	chemokine (C-C motif) ligand 5	protein_coding	51.5583	3.39161	0.000694842	0.00720834	81	13	21	1	5026	140	177	6.87244	5.17698	5.71705	4.10919	12.3474	6.94668	7.01868
ENSMUSG00000059089	246256	Fcgr4	Fc receptor, IgG, low affinity IV	protein_coding	16.5648	3.39134	0.000695511	0.00721284	185	25	55	74	4322	289	634	7.89026	5.68565	6.68501	6.77434	12.1309	7.84191	8.65284
ENSMUSG00000081239		Gm11836	predicted gene 11836	processed_pseudogene	1.7027	3.39067	0.000697214	0.00722561	90	85	85	83	203	230	276	6.99563	6.94323	7.19376	6.90665	7.87248	7.55083	7.56211
ENSMUSG00000036023	11546	Parp2	poly (ADP-ribose) polymerase family, member 2	protein_coding	1.49998	3.38993	0.000699095	0.0072418	289	311	194	255	464	686	775	8.47919	8.59492	8.24474	8.31858	8.97731	8.99666	8.92625
ENSMUSG00000020777	11430	Acox1	acyl-Coenzyme A oxidase 1, palmitoyl	protein_coding	1.62561	3.38987	0.000699249	0.0072418	1911	1650	1388	2047	2815	4322	7316	11.1157	10.9244	10.9776	11.221	11.5167	11.5909	12.0966
ENSMUSG00000035799	22160	Twist1	twist basic helix-loop-helix transcription factor 1	protein_coding	1.71553	3.38967	0.000699771	0.00724313	300	313	196	390	530	810	1230	8.52941	8.60358	8.25835	8.8923	9.16024	9.22552	9.56489
ENSMUSG00000026589	89867	Sec16b	SEC16 homolog B (S. cerevisiae)	protein_coding	1.73967	3.38964	0.00069985	0.00724313	58	77	48	67	137	174	220	6.49751	6.82848	6.53415	6.66206	7.37468	7.20593	7.28047
ENSMUSG00000053846	16891	Lipg	lipase, endothelial	protein_coding	3.66094	3.38925	0.000700848	0.00725101	87	49	18	34	359	153	224	6.95575	6.33116	5.58497	5.95844	8.62784	7.05148	7.30254
ENSMUSG00000019990	29863	Pde7b	phosphodiesterase 7B	protein_coding	1.91704	3.38914	0.00070112	0.00725138	74	103	83	105	222	217	431	6.76857	7.17171	7.16499	7.18587	7.98869	7.47787	8.13706
ENSMUSG00000039068	108946	Zzz3	zinc finger, ZZ domain containing 3	protein_coding	1.37326	3.38856	0.000702605	0.00726429	498	527	381	489	749	1111	1352	9.22143	9.31718	9.15942	9.20322	9.64058	9.66489	9.69699
ENSMUSG00000053113	12702	Socs3	suppressor of cytokine signaling 3	protein_coding	7.2703	3.38837	0.000703095	0.00726689	394	315	296	883	9212	1809	2602	8.89933	8.61219	8.81319	10.0281	13.2183	10.3508	10.6202
ENSMUSG00000091694	328563	Apol11b	apolipoprotein L 11b	protein_coding	58.5287	3.3864	0.000708161	0.00730939	4	3	0	3	482	8	14	4.52938	4.42245	3.67762	4.41971	9.02954	4.62045	4.8123
ENSMUSG00000084390		Gm15425	predicted gene 15425	processed_pseudogene	35.645	3.3861	0.000708928	0.00731239	0	0	0	0	6	9	19	3.67762	3.67762	3.67762	3.67762	4.66189	4.67552	4.98827
ENSMUSG00000048373	14181	Fgfbp1	fibroblast growth factor binding protein 1	protein_coding	1.79663	3.3856	0.000710229	0.00732088	2328	1190	1261	1658	3736	4831	5388	11.3975	10.4601	10.841	10.9205	11.9219	11.7502	11.6583
ENSMUSG00000027660	20482	Skil	SKI-like	protein_coding	2.03288	3.38507	0.000711609	0.00733264	438	289	276	333	1178	872	1072	9.04447	8.49609	8.71803	8.67721	10.2772	9.32762	9.37358
ENSMUSG00000034845	84094	Plvap	plasmalemma vesicle associated protein	protein_coding	2.1146	3.38495	0.000711923	0.00733341	5525	2217	2768	3683	11026	12012	12272	12.6365	11.3457	11.9644	12.0615	13.477	13.0579	12.8394
ENSMUSG00000070271		Gm13268	predicted gene 13268	processed_pseudogene	1.41144	3.38465	0.000712691	0.00733885	1164	1001	826	956	1748	2377	2661	10.411	10.2155	10.2411	10.14	10.8369	10.738	10.6521
ENSMUSG00000040296	230073	Ddx58	DEAD (Asp-Glu-Ala-Asp) box polypeptide 58	protein_coding	2.06066	3.38364	0.000715317	0.00736273	286	181	194	208	771	567	737	8.46518	7.87825	8.24474	8.04948	9.68104	8.73649	8.85752
ENSMUSG00000029454	17165	Mapkapk5	MAP kinase-activated protein kinase 5	protein_coding	3.06042	3.38341	0.00071591	0.00736273	8	39	21	29	85	103	185	4.86588	6.09876	5.71705	5.81072	6.80514	6.59698	7.07118
ENSMUSG00000043903	195209	Zfp469	zinc finger protein 469	protein_coding	2.36894	3.38065	0.00072314	0.00742728	71	36	29	77	163	163	284	6.72159	6.02046	6.01475	6.81984	7.59188	7.12712	7.59816
ENSMUSG00000020130	66687	Tbc1d15	TBC1 domain family, member 15	protein_coding	1.74338	3.38062	0.000723217	0.00742728	359	395	340	420	949	794	1462	8.77243	8.92	9.00275	8.99379	9.97238	9.19795	9.80654
ENSMUSG00000029061	26561	Mmp23	matrix metallopeptidase 23	protein_coding	1.53831	3.38022	0.000724282	0.00743571	534	468	444	525	936	1066	1760	9.31803	9.15301	9.37118	9.30149	9.95298	9.60712	10.0673
ENSMUSG00000066682	545812	Pilrb2	paired immunoglobin-like type 2 receptor beta 2	protein_coding	5.7477	3.3793	0.000726697	0.00745302	21	9	5	7	155	46	41	5.5282	4.94129	4.73396	4.79554	7.52849	5.78616	5.53819
ENSMUSG00000035245	101351	Eogt	EGF domain-specific O-linked N-acetylglucosamine (GlcNAc) transferase	protein_coding	1.47302	3.37901	0.000727469	0.00745844	281	279	188	244	416	651	730	8.44153	8.44882	8.20314	8.25997	8.82797	8.92489	8.84449
ENSMUSG00000091277		Gm1818	predicted gene 1818	unprocessed_pseudogene	4.54927	3.37806	0.000729992	0.00747931	3	20	9	6	49	41	132	4.41788	5.49882	5.07183	4.71614	6.20817	5.68447	6.68022
ENSMUSG00000024180	60455	Tmem8	transmembrane protein 8	protein_coding	2.77074	3.37673	0.000733519	0.0075029	291	118	137	230	1075	593	693	8.48845	7.33751	7.7903	8.18173	10.148	8.79748	8.77362
ENSMUSG00000081121		Gm12791	predicted gene 12791	processed_pseudogene	2.20099	3.37631	0.000734646	0.00750942	56	35	37	41	151	117	171	6.45959	5.99331	6.25788	6.14101	7.49571	6.73973	6.97798
ENSMUSG00000117515		Gm6883	predicted gene 6883	processed_pseudogene	1.46231	3.37581	0.000735988	0.00752062	685	577	417	553	960	1424	1608	9.66471	9.44301	9.28421	9.37354	9.98859	10.0131	9.94017
ENSMUSG00000021192	27277	Golga5	golgi autoantigen, golgin subfamily a, 5	protein_coding	1.40558	3.37522	0.000737571	0.00753365	671	670	487	676	933	1572	1874	9.63586	9.65135	9.4997	9.6533	9.94847	10.1524	10.1557
ENSMUSG00000068040	99237	Tm9sf4	transmembrane 9 superfamily protein member 4	protein_coding	1.52206	3.37475	0.000738841	0.007538	843	579	561	691	1129	1781	2143	9.95571	9.44783	9.69715	9.68398	10.2171	10.3287	10.3452
ENSMUSG00000039853	74735	Trim14	tripartite motif-containing 14	protein_coding	3.53058	3.37473	0.000738883	0.007538	20	13	9	7	58	36	120	5.4887	5.17698	5.07183	4.79554	6.38324	5.57395	6.57425
ENSMUSG00000059230	56519	Defb4	defensin beta 4	protein_coding	5.84644	3.3747	0.000738963	0.007538	61	5	12	5	97	232	285	6.55251	4.63238	5.26898	4.62892	6.95835	7.56173	7.60261
ENSMUSG00000037096		Gm9762	predicted pseudogene 9762	processed_pseudogene	1.62722	3.37462	0.000739164	0.007538	207	254	201	246	473	506	844	8.03655	8.32336	8.29181	8.2708	9.00366	8.58236	9.04323
ENSMUSG00000101316		Gm12663	predicted gene 12663	processed_pseudogene	3.8278	3.37404	0.000740734	0.00754899	11	30	5	8	67	60	123	5.0575	5.84852	4.73396	4.86873	6.53853	6.03479	6.60151
ENSMUSG00000030766	70497	Arhgap17	Rho GTPase activating protein 17	protein_coding	1.4897	3.37294	0.000743713	0.00757179	502	448	329	395	800	1052	1167	9.23249	9.09283	8.95764	8.90972	9.73271	9.58867	9.49162
ENSMUSG00000036966	223918	Spryd3	SPRY domain containing 3	protein_coding	1.53565	3.37248	0.000744955	0.00758192	939	657	640	713	1404	1789	2371	10.1075	9.62397	9.8818	9.72783	10.5256	10.3351	10.4884
ENSMUSG00000021583	80898	Erap1	endoplasmic reticulum aminopeptidase 1	protein_coding	2.09928	3.37189	0.000746532	0.00759544	492	389	361	430	1614	1001	1388	9.20468	8.89907	9.08512	9.0261	10.7235	9.51938	9.73377
ENSMUSG00000047879	59025	Usp14	ubiquitin specific peptidase 14	protein_coding	1.48595	3.37135	0.000747997	0.00760278	599	661	643	688	1055	1674	2114	9.47757	9.63245	9.88836	9.6779	10.1215	10.2411	10.326
ENSMUSG00000014303	83396	Glis2	GLIS family zinc finger 2	protein_coding	1.7693	3.36763	0.000758182	0.00769099	112	134	119	176	270	351	580	7.25813	7.49537	7.61066	7.83235	8.24618	8.09502	8.53266
ENSMUSG00000079363	17472	Gbp4	guanylate binding protein 4	protein_coding	4.48883	3.36743	0.000758722	0.00769393	248	71	66	133	1474	303	569	8.27484	6.73583	6.89344	7.47661	10.5946	7.90309	8.50689
ENSMUSG00000111356	621697	Rpl32l	ribosomal protein L32-like	processed_pseudogene	1.51688	3.36722	0.000759308	0.00769732	469	381	315	331	683	945	1162	9.13861	8.87067	8.89812	8.66905	9.51189	9.43925	9.48564
ENSMUSG00000000182	64654	Fgf23	fibroblast growth factor 23	protein_coding	179.876	3.36653	0.000761194	0.00770879	0	0	0	1	184	3	13	3.67762	3.67762	3.67762	4.10919	7.74601	4.26132	4.77293
ENSMUSG00000043535	269254	Setx	senataxin	protein_coding	1.48278	3.36394	0.000768381	0.00777386	431	507	379	434	850	985	1334	9.02234	9.26359	9.15216	9.03882	9.81765	9.49693	9.67825
ENSMUSG00000052212	68891	Cd177	CD177 antigen	protein_coding	24.1575	3.36369	0.000769069	0.00777826	16	1	12	3	616	101	33	5.31644	4.11081	5.26898	4.41971	9.36832	6.57534	5.36679
ENSMUSG00000027006	66861	Dnajc10	DnaJ heat shock protein family (Hsp40) member C10	protein_coding	1.47905	3.36276	0.000771685	0.00779967	878	880	685	834	1674	1787	2387	10.0129	10.0338	9.97729	9.94774	10.7754	10.3335	10.4979
ENSMUSG00000024065	57440	Ehd3	EH-domain containing 3	protein_coding	2.8388	3.36275	0.000771695	0.00779967	60	101	69	164	503	238	545	6.53442	7.14807	6.94531	7.74164	9.08819	7.59394	8.44903
ENSMUSG00000016487	67533	Ppfibp1	PTPRF interacting protein, binding protein 1 (liprin beta 1)	protein_coding	1.65861	3.36255	0.000772253	0.00780274	495	671	515	590	1045	1341	2375	9.21308	9.65343	9.57763	9.46355	10.1081	9.92863	10.4908
ENSMUSG00000053158	14159	Fes	feline sarcoma oncogene	protein_coding	2.56846	3.36183	0.000774264	0.0078121	669	387	471	411	2567	1376	1579	9.63169	8.89202	9.45321	8.96409	11.3848	9.96484	9.91459
ENSMUSG00000017652	21939	Cd40	CD40 antigen	protein_coding	3.31402	3.36168	0.000774695	0.0078121	134	35	86	71	562	266	380	7.47964	5.99331	7.20794	6.72732	9.24121	7.73536	7.97206
ENSMUSG00000026914	59029	Psmd14	proteasome (prosome, macropain) 26S subunit, non-ATPase, 14	protein_coding	1.53145	3.36154	0.000775085	0.00781331	1125	1508	1144	1278	2483	2894	4141	10.3628	10.7963	10.7026	10.5506	11.3373	11.0181	11.2819
ENSMUSG00000058656	320679	Samd12	sterile alpha motif domain containing 12	protein_coding	2.51048	3.36134	0.000775657	0.00781651	29	14	35	40	89	139	140	5.80613	5.22876	6.20107	6.1164	6.85808	6.93828	6.74666
ENSMUSG00000111133		Gm5831	predicted gene 5831	processed_pseudogene	4.87525	3.36109	0.000776355	0.00782097	28	8	22	19	246	66	79	5.77452	4.87298	5.7582	5.45189	8.12319	6.12858	6.13499
ENSMUSG00000040479	104418	Dgkz	diacylglycerol kinase zeta	protein_coding	1.41281	3.35961	0.000780527	0.00784753	1106	1176	875	990	1797	2274	3143	10.3387	10.4434	10.3226	10.1893	10.8762	10.6751	10.8887
ENSMUSG00000021298	56696	Gpr132	G protein-coupled receptor 132	protein_coding	3.90961	3.35927	0.000781485	0.00785458	87	71	51	56	668	214	168	6.95575	6.73583	6.60081	6.46504	9.48097	7.46049	6.95718
ENSMUSG00000051498	21899	Tlr6	toll-like receptor 6	protein_coding	3.19404	3.35533	0.000792711	0.00794656	31	39	33	41	260	124	111	5.86714	6.09876	6.14178	6.14101	8.19621	6.806	6.48911
ENSMUSG00000022491	14663	Glycam1	glycosylation dependent cell adhesion molecule 1	protein_coding	7.74534	3.35429	0.000795676	0.00797368	9	6	1	2	89	27	23	4.93383	4.71989	4.15842	4.28573	6.85808	5.34614	5.11017
ENSMUSG00000062585	12802	Cnr2	cannabinoid receptor 2 (macrophage)	protein_coding	5.08257	3.35417	0.000796037	0.00797468	22	15	6	4	138	48	65	5.56648	5.27829	4.82993	4.53147	7.38367	5.82469	5.94529
ENSMUSG00000029635	264064	Cdk8	cyclin-dependent kinase 8	protein_coding	1.62138	3.35313	0.000799033	0.00800208	185	190	104	158	300	424	541	7.89026	7.94118	7.44153	7.69403	8.38644	8.34515	8.43915
ENSMUSG00000032725	14276	Folr2	folate receptor 2 (fetal)	protein_coding	2.31628	3.35271	0.000800255	0.0080117	730	238	501	504	1331	1612	2822	9.75374	8.23692	9.53919	9.24498	10.4499	10.1879	10.7355
ENSMUSG00000036565	78339	Ttyh3	tweety family member 3	protein_coding	1.54714	3.35211	0.000801981	0.00802296	856	1007	555	757	1482	2115	2372	9.97723	10.2239	9.68211	9.81173	10.6023	10.5722	10.489
ENSMUSG00000020993	78232	Trappc6b	trafficking protein particle complex 6B	protein_coding	1.87512	3.35192	0.000802529	0.00802296	284	473	329	415	950	858	1649	8.45577	9.16767	8.95764	8.97737	9.97386	9.30519	9.97557
ENSMUSG00000002111	20375	Spi1	spleen focus forming virus (SFFV) proviral integration oncogene	protein_coding	2.88476	3.3518	0.000802866	0.00802296	772	355	661	538	3657	1696	2069	9.83215	8.7743	9.92715	9.33539	11.8913	10.2596	10.2955
ENSMUSG00000024563	17126	Smad2	SMAD family member 2	protein_coding	1.37436	3.35178	0.000802951	0.00802296	550	564	408	541	793	1267	1442	9.35897	9.41134	9.25401	9.3431	9.7204	9.84891	9.78723
ENSMUSG00000105461		Gm4742	predicted gene 4742	processed_pseudogene	2.25708	3.35101	0.000805179	0.00804205	16	19	14	25	50	70	85	5.31644	5.45783	5.38378	5.67913	6.22877	6.18767	6.20876
ENSMUSG00000052593	11491	Adam17	a disintegrin and metallopeptidase domain 17	protein_coding	1.71401	3.35094	0.000805386	0.00804205	936	569	657	657	1666	1838	2349	10.103	9.4236	9.91862	9.61347	10.7685	10.3733	10.4752
ENSMUSG00000035041	208677	Creb3l3	cAMP responsive element binding protein 3-like 3	protein_coding	1.94488	3.35054	0.000806527	0.00805082	59	50	29	56	92	187	188	6.51609	6.35236	6.01475	6.46504	6.89652	7.29375	7.09038
ENSMUSG00000018417	17912	Myo1b	myosin IB	protein_coding	1.86093	3.35015	0.000807669	0.00805959	593	323	263	347	848	1277	1314	9.46356	8.6461	8.65262	8.73309	9.81435	9.85995	9.65713
ENSMUSG00000020227	73914	Irak3	interleukin-1 receptor-associated kinase 3	protein_coding	2.00268	3.34944	0.000809762	0.00807687	445	251	335	280	1024	861	1255	9.06627	8.30755	8.98242	8.44354	10.0795	9.31003	9.59296
ENSMUSG00000038811	14710	Gngt2	guanine nucleotide binding protein (G protein), gamma transducing activity polypeptide 2	protein_coding	2.59516	3.34938	0.000809928	0.00807687	394	259	235	317	1647	739	1032	8.89933	8.34934	8.50076	8.61058	10.7522	9.09896	9.32083
ENSMUSG00000095159		Tubb4b-ps1	tubulin, beta 4B class IVB, pseudogene 1	processed_pseudogene	2.21404	3.34904	0.00081093	0.00808424	68	95	111	136	294	265	581	6.67298	7.07469	7.52295	7.50451	8.35946	7.73054	8.53497
ENSMUSG00000021886	14744	Gpr65	G-protein coupled receptor 65	protein_coding	5.70643	3.34886	0.000811445	0.00808674	70	18	24	18	515	100	116	6.70557	5.41541	5.83676	5.40958	9.12065	6.56439	6.53705
ENSMUSG00000024899	23972	Papss2	3'-phosphoadenosine 5'-phosphosulfate synthase 2	protein_coding	1.84179	3.3484	0.000812803	0.00809764	308	176	187	347	550	815	926	8.56487	7.84205	8.19609	8.73309	9.21138	9.23403	9.17093
ENSMUSG00000078945	17948	Naip2	NLR family, apoptosis inhibitory protein 2	protein_coding	3.81673	3.34777	0.000814652	0.00811343	68	26	34	32	366	116	163	6.67298	5.71991	6.17175	5.90133	8.65397	6.73001	6.92182
ENSMUSG00000044912	238266	Syt16	synaptotagmin XVI	protein_coding	12.7353	3.3441	0.000825503	0.00820816	2	2	2	0	3	67	33	4.28421	4.28798	4.3545	3.67762	4.38022	6.1436	5.36679
ENSMUSG00000114375		Gm31544	predicted gene, 31544	processed_pseudogene	6.78896	3.34362	0.000826939	0.00821976	4	13	2	0	34	39	89	4.52938	5.17698	4.3545	3.67762	5.85403	5.64142	6.2558
ENSMUSG00000044867		Gimap1os	GTPase, IMAP family member 1, opposite strand	processed_transcript	27.0738	3.3425	0.000830268	0.00825018	0	0	0	1	17	8	12	3.67762	3.67762	3.67762	4.10919	5.28265	4.62045	4.7318
ENSMUSG00000115637		Gm30970	predicted gene, 30970	processed_pseudogene	4.19067	3.34209	0.000831509	0.00825716	27	5	4	8	45	76	107	5.74212	4.63238	4.62649	4.86873	6.1225	6.27174	6.44952
ENSMUSG00000030452	93790	Nipa2	non imprinted in Prader-Willi/Angelman syndrome 2 homolog (human)	protein_coding	1.88545	3.34157	0.000833073	0.00827001	341	463	323	365	1117	816	1406	8.70254	9.1382	8.93244	8.80189	10.2021	9.23572	9.75181
ENSMUSG00000115338	18950	Pnp	purine-nucleoside phosphorylase	protein_coding	2.28474	3.34065	0.000835821	0.00828955	632	436	432	609	2345	1314	1731	9.55228	9.05547	9.33317	9.50767	11.2556	9.90005	10.0439
ENSMUSG00000042082	11881	Arsb	arylsulfatase B	protein_coding	1.62185	3.34064	0.000835852	0.00828955	190	201	136	202	323	432	724	7.92484	8.01453	7.78089	8.01119	8.48542	8.37009	8.83324
ENSMUSG00000067201	14997	H2-M9	histocompatibility 2, M region locus 9	protein_coding	3.02716	3.34005	0.000837631	0.00829645	50	16	39	27	94	117	317	6.33915	5.32579	6.31241	5.7466	6.92158	6.73973	7.73797
ENSMUSG00000027204	14118	Fbn1	fibrillin 1	protein_coding	2.50549	3.33973	0.000838606	0.0082995	1915	756	1595	2121	3822	4872	12242	11.1187	9.82042	11.1758	11.2717	11.9546	11.7623	12.8359
ENSMUSG00000050350	110168	Gpr18	G protein-coupled receptor 18	protein_coding	7.48034	3.33751	0.000845328	0.00835109	9	2	2	9	109	31	22	4.93383	4.28798	4.3545	4.93682	7.09654	5.45269	5.08097
ENSMUSG00000026104	20846	Stat1	signal transducer and activator of transcription 1	protein_coding	3.5714	3.33411	0.000855728	0.00844022	802	509	644	797	6376	1577	2175	9.88566	9.26904	9.89055	9.88398	12.6892	10.1569	10.3662
ENSMUSG00000033220	19354	Rac2	Rac family small GTPase 2	protein_coding	3.60907	3.33186	0.000862661	0.0085004	432	164	354	291	2785	806	1173	9.02552	7.75126	9.05818	8.49525	11.5014	9.21868	9.49876
ENSMUSG00000036103	140792	Colec12	collectin sub-family member 12	protein_coding	1.75329	3.33089	0.000865697	0.00852723	309	258	241	356	674	624	1208	8.56924	8.34419	8.53468	8.7679	9.49341	8.86698	9.53973
ENSMUSG00000041620	83996	Mmp1b	matrix metallopeptidase 1b (interstitial collagenase)	protein_coding	19.531	3.32923	0.000870872	0.00856753	5	1	0	0	85	7	19	4.6266	4.11081	3.67762	3.67762	6.80514	4.56145	4.98827
ENSMUSG00000037172	243780	Dennd11	DENN domain containing 11	protein_coding	1.71829	3.32913	0.000871187	0.00856788	342	252	228	220	455	710	1106	8.70652	8.31284	8.46015	8.12312	8.95046	9.04388	9.41694
ENSMUSG00000026356	226414	Dars	aspartyl-tRNA synthetase	protein_coding	1.82519	3.32884	0.000872095	0.00857406	499	819	460	665	1451	1397	2614	9.2242	9.93279	9.42035	9.63038	10.5723	9.98615	10.6268
ENSMUSG00000034118	22021	Tpst1	protein-tyrosine sulfotransferase 1	protein_coding	1.50285	3.32842	0.000873402	0.00858083	407	344	288	437	610	893	1259	8.94376	8.73151	8.77588	9.04829	9.35474	9.36063	9.59741
ENSMUSG00000029309	13602	Sparcl1	SPARC-like 1	protein_coding	1.84921	3.3279	0.000875038	0.0085893	1383	1130	1355	1779	2680	3548	7203	10.6555	10.3869	10.9434	11.0209	11.4464	11.3088	12.0742
ENSMUSG00000067377	56496	Tspan6	tetraspanin 6	protein_coding	1.6132	3.32688	0.000878233	0.00861506	130	165	99	130	273	354	396	7.44184	7.75905	7.38039	7.44814	8.26084	8.1062	8.02589
ENSMUSG00000033790	233276	Tubgcp5	tubulin, gamma complex associated protein 5	protein_coding	2.01872	3.32658	0.000879192	0.00862171	62	124	68	93	232	231	393	6.57037	7.39877	6.92823	7.04042	8.04627	7.55629	8.01595
ENSMUSG00000017837	71966	Nkiras2	NFKB inhibitor interacting Ras-like protein 2	protein_coding	1.56992	3.32605	0.000880854	0.00863524	889	638	552	596	1148	1815	2263	10.0305	9.58301	9.67453	9.47763	10.2407	10.3555	10.4223
ENSMUSG00000050530	269233	Fam171a1	family with sequence similarity 171, member A1	protein_coding	1.90578	3.32442	0.00088604	0.00867787	446	210	246	255	597	967	1184	9.06936	8.07188	8.56234	8.31858	9.32487	9.47126	9.51176
ENSMUSG00000056579		Tug1	taurine upregulated gene 1	protein_coding	1.35075	3.32441	0.000886052	0.00867787	564	523	434	529	814	1150	1456	9.39386	9.30662	9.33958	9.31201	9.757	9.71314	9.80077
ENSMUSG00000033460	78248	Armcx1	armadillo repeat containing, X-linked 1	protein_coding	1.98244	3.32402	0.000887314	0.00868746	59	110	53	62	158	264	270	6.51609	7.25149	6.64355	6.57594	7.55259	7.72571	7.53446
ENSMUSG00000051242	93880	Pcdhb9	protocadherin beta 9	protein_coding	6.50249	3.32388	0.000887754	0.00868898	10	7	1	0	37	36	68	4.9975	4.79955	4.15842	3.67762	5.9328	5.57395	5.98827
ENSMUSG00000008136	14200	Fhl2	four and a half LIM domains 2	protein_coding	2.11556	3.32304	0.000890427	0.0087068	361	185	227	183	441	1136	991	8.77999	7.90656	8.45425	7.88274	8.90768	9.696	9.26468
ENSMUSG00000029664	21789	Tfpi2	tissue factor pathway inhibitor 2	protein_coding	4.06556	3.32174	0.000894578	0.00874182	9	5	14	17	96	40	72	4.93383	4.63238	5.38378	5.36573	6.9462	5.66313	6.0435
ENSMUSG00000049502	209200	Dtx3l	deltex 3-like, E3 ubiquitin ligase	protein_coding	2.56781	3.32028	0.000899288	0.00877945	283	217	166	247	1226	523	817	8.45104	8.11495	8.03938	8.27619	10.3336	8.627	8.99858
ENSMUSG00000025231	24069	Sufu	SUFU negative regulator of hedgehog signaling	protein_coding	1.56932	3.31876	0.000904193	0.00882171	363	290	205	263	547	754	831	8.78752	8.50073	8.31802	8.35976	9.20382	9.12664	9.0219
ENSMUSG00000034652	217303	Cd300a	CD300A molecule	protein_coding	2.98421	3.31832	0.000905607	0.0088287	294	85	213	350	1326	825	1030	8.50224	6.94323	8.36907	8.74479	10.4446	9.25089	9.31814
ENSMUSG00000028037	99899	Ifi44	interferon-induced protein 44	protein_coding	3.53312	3.31827	0.000905773	0.0088287	52	21	20	36	243	75	180	6.38048	5.53849	5.67453	6.0132	8.10705	6.25809	7.03859
ENSMUSG00000051147	17961	Nat2	N-acetyltransferase 2 (arylamine N-acetyltransferase)	protein_coding	1.69429	3.31811	0.00090629	0.00883092	93	104	79	89	219	257	265	7.03442	7.18339	7.10562	6.98842	7.97095	7.69141	7.511
ENSMUSG00000047867	231931	Gimap6	GTPase, IMAP family member 6	protein_coding	2.29103	3.31782	0.000907226	0.00883672	286	168	136	340	880	620	949	8.46518	7.78217	7.78089	8.70542	9.86632	8.8582	9.2048
ENSMUSG00000098050		Gm5345	predicted gene 5345	processed_pseudogene	20.7836	3.31775	0.000907462	0.00883672	0	2	0	0	11	13	29	3.67762	4.28798	3.67762	3.67762	4.99055	4.86703	5.2709
ENSMUSG00000026442	269116	Nfasc	neurofascin	protein_coding	2.3822	3.31577	0.00091392	0.00888041	68	39	74	74	264	195	256	6.67298	6.09876	7.02773	6.77434	8.2164	7.34522	7.46778
ENSMUSG00000029860	22793	Zyx	zyxin	protein_coding	1.98287	3.31575	0.000913977	0.00888041	1678	1347	1246	1786	5356	3790	4552	10.9304	10.6359	10.824	11.0265	12.4387	11.403	11.4171
ENSMUSG00000051457	20737	Spn	sialophorin	protein_coding	2.6734	3.3142	0.000919056	0.00891845	110	65	42	54	345	217	241	7.23617	6.63661	6.39035	6.42601	8.57412	7.47787	7.3927
ENSMUSG00000083396		Gm15542	predicted gene 15542	processed_pseudogene	1.63324	3.31398	0.000919794	0.00892176	153	173	166	181	384	407	546	7.64668	7.81989	8.03938	7.86852	8.71906	8.29066	8.45149
ENSMUSG00000075010		AW112010	expressed sequence AW112010	lincRNA	11.6291	3.31372	0.000920652	0.00892264	175	99	117	156	5016	350	616	7.81849	7.12403	7.58923	7.6778	12.3446	8.09127	8.61388
ENSMUSG00000010142	57916	Tnfrsf13b	tumor necrosis factor receptor superfamily, member 13b	protein_coding	2.59316	3.31349	0.000921384	0.00892691	89	36	71	59	301	210	255	6.98246	6.02046	6.97886	6.5216	8.39089	7.43699	7.46289
ENSMUSG00000021065	53618	Fut8	fucosyltransferase 8	protein_coding	2.3123	3.31287	0.000923426	0.00894387	100	234	98	140	449	362	800	7.121	8.21447	7.36784	7.54089	8.93228	8.13561	8.96974
ENSMUSG00000024201	193796	Kdm4b	lysine (K)-specific demethylase 4B	protein_coding	1.52961	3.3122	0.00092566	0.00896267	459	403	282	392	627	933	1373	9.10891	8.94746	8.74724	8.89929	9.3929	9.42148	9.71856
ENSMUSG00000043889		Gm8399	predicted gene 8399	processed_pseudogene	1.86446	3.3115	0.000927969	0.00898219	701	478	474	520	1558	1773	1397	9.697	9.18218	9.46204	9.28824	10.6733	10.3224	9.74282
ENSMUSG00000026420	93672	Il24	interleukin 24	protein_coding	21.1321	3.30932	0.000935243	0.00904118	6	1	2	20	449	73	44	4.71362	4.11081	4.3545	5.49277	8.93228	6.23035	5.59677
ENSMUSG00000052488	27967	Cherp	calcium homeostasis endoplasmic reticulum protein	protein_coding	1.39734	3.30912	0.000935899	0.00904467	609	719	553	624	1072	1495	1731	9.50062	9.75009	9.67706	9.54158	10.144	10.0816	10.0439
ENSMUSG00000066151	338355	Fkbp15	FK506 binding protein 15	protein_coding	1.6322	3.30833	0.000938548	0.00905884	1010	639	581	722	1587	1906	2325	10.2104	9.58519	9.74618	9.7454	10.6995	10.4247	10.4606
ENSMUSG00000110744		Gm5171	predicted gene 5171	processed_pseudogene	1.77497	3.30819	0.000939016	0.0090605	156	109	81	97	205	376	392	7.67136	7.24037	7.13561	7.09058	7.88516	8.18566	8.01262
ENSMUSG00000042622	17133	Maff	v-maf musculoaponeurotic fibrosarcoma oncogene family, protein F (avian)	protein_coding	2.34873	3.30803	0.000939559	0.00906288	520	214	204	275	1105	1237	925	9.28123	8.09665	8.31151	8.4194	10.1868	9.8153	9.16944
ENSMUSG00000024798	15566	Htr7	5-hydroxytryptamine (serotonin) receptor 7	protein_coding	8.95937	3.30496	0.000949885	0.00914521	2	5	13	2	151	20	38	4.28421	4.63238	5.32778	4.28573	7.49571	5.13259	5.47671
ENSMUSG00000060739	59050	Nsa2	NSA2 ribosome biogenesis homolog	protein_coding	1.42651	3.30436	0.000951951	0.00915648	1183	1268	943	1133	2114	2411	3343	10.4339	10.5501	10.4285	10.38	11.1077	10.7582	10.9766
ENSMUSG00000029186	67073	Pi4k2b	phosphatidylinositol 4-kinase type 2 beta	protein_coding	1.74148	3.30374	0.000954056	0.00917096	251	293	139	233	488	563	895	8.29082	8.51457	7.80894	8.19886	9.04654	8.72687	9.12397
ENSMUSG00000027523	14683	Gnas	GNAS (guanine nucleotide binding protein, alpha stimulating) complex locus	protein_coding	1.71041	3.3028	0.000957261	0.00919889	6262	8847	7661	10267	16460	20280	34219	12.8164	13.3316	13.4271	13.535	14.054	13.8117	14.3156
ENSMUSG00000090625		Gm20721	predicted gene, 20721	protein_coding	2.75759	3.30193	0.000960227	0.00922161	18	11	21	13	63	52	100	5.40566	5.06559	5.71705	5.17181	6.47165	5.8985	6.3774
ENSMUSG00000058017	394252	Serpinb3d	serine (or cysteine) peptidase inhibitor, clade B (ovalbumin), member 3D	protein_coding	14.158	3.30162	0.000961291	0.00922877	5	0	0	0	13	25	53	4.6266	3.67762	3.67762	3.67762	5.09678	5.28906	5.75777
ENSMUSG00000029192	100855	Tbc1d14	TBC1 domain family, member 14	protein_coding	1.59086	3.30153	0.000961575	0.00922877	959	610	607	745	1493	1810	2358	10.1373	9.52043	9.80752	9.78933	10.6128	10.3516	10.4806
ENSMUSG00000067780	94227	Pi15	peptidase inhibitor 15	protein_coding	2.18631	3.30088	0.000963821	0.00924743	265	304	110	187	718	789	663	8.36312	8.5642	7.5116	7.91075	9.58156	9.18923	8.71347
ENSMUSG00000073491	623121	Ifi213	interferon activated gene 213	protein_coding	3.94771	3.30076	0.000964221	0.00924837	41	10	14	28	194	65	142	6.13595	5.00528	5.38378	5.77906	7.81396	6.1134	6.76279
ENSMUSG00000035692	100038882	Isg15	ISG15 ubiquitin-like modifier	protein_coding	3.73837	3.29939	0.000968943	0.00928204	466	101	238	259	2324	719	1207	9.12976	7.14807	8.51782	8.33932	11.2428	9.0612	9.53857
ENSMUSG00000071656	68852	Lrrn4cl	LRRN4 C-terminal like	protein_coding	2.01217	3.29909	0.000969973	0.00928901	530	369	361	553	799	1191	2757	9.30761	8.82699	9.08512	9.37354	9.73096	9.76219	10.7024
ENSMUSG00000081957		Ak3l2-ps	adenylate kinase 3-like 2, pseudogene	processed_pseudogene	7.26779	3.29885	0.000970831	0.00929432	7	0	2	1	18	28	46	4.79285	3.67762	4.3545	4.10919	5.32476	5.37368	5.63435
ENSMUSG00000000693	16950	Loxl3	lysyl oxidase-like 3	protein_coding	3.31344	3.29862	0.000971622	0.00929899	138	76	167	217	1084	324	812	7.51647	6.81346	8.04724	8.10506	10.1597	7.99023	8.99015
ENSMUSG00000059173	18573	Pde1a	phosphodiesterase 1A, calmodulin-dependent	protein_coding	2.57331	3.29715	0.000976716	0.00933607	49	38	49	75	250	130	248	6.31801	6.07317	6.55672	6.78967	8.14444	6.86041	7.42823
ENSMUSG00000102329		Gm10851	predicted gene 10851	antisense	48.445	3.29685	0.000977745	0.00933875	0	0	1	0	46	1	10	3.67762	3.67762	4.15842	3.67762	6.14443	4.01615	4.64337
ENSMUSG00000031529	21951	Tnks	tankyrase, TRF1-interacting ankyrin-related ADP-ribose polymerase	protein_coding	1.45901	3.29682	0.000977865	0.00933875	257	296	245	318	507	662	830	8.32225	8.52828	8.55685	8.61484	9.09909	8.94784	9.02025
ENSMUSG00000056917	20469	Sipa1	signal-induced proliferation associated gene 1	protein_coding	2.07608	3.29681	0.000977909	0.00933875	356	242	253	341	1109	724	1004	8.76102	8.25902	8.6002	8.70941	10.1919	9.07073	9.28272
ENSMUSG00000036006	193385	Ripor2	RHO family interacting cell polarization regulator 2	protein_coding	3.50545	3.29578	0.000981483	0.00936703	51	59	51	35	405	97	247	6.35997	6.5298	6.60081	5.9861	8.79146	6.53103	7.42321
ENSMUSG00000039252	246316	Lgi2	leucine-rich repeat LGI family, member 2	protein_coding	2.87916	3.29567	0.000981881	0.00936792	550	133	337	392	1785	1013	1948	9.35897	7.486	8.99059	8.89929	10.8667	9.53598	10.2104
ENSMUSG00000050069	23893	Grem2	gremlin 2, DAN family BMP antagonist	protein_coding	2.66593	3.29522	0.000983447	0.00937994	120	53	54	99	414	286	260	7.34272	6.41408	6.66443	7.11501	8.8214	7.82845	7.48715
ENSMUSG00000025037	17161	Maoa	monoamine oxidase A	protein_coding	1.80919	3.29483	0.000984804	0.00938996	580	366	374	379	667	1560	1693	9.43274	8.81586	9.13385	8.85322	9.47888	10.1416	10.0126
ENSMUSG00000115009		G930009F23Rik	RIKEN cDNA G930009F23 gene	lincRNA	3.53395	3.29395	0.000987887	0.00940515	19	4	13	16	82	51	81	5.44789	4.5346	5.32778	5.32019	6.76409	5.88044	6.16003
ENSMUSG00000057605		Gm6807	predicted gene 6807	processed_pseudogene	2.10822	3.29394	0.000987932	0.00940515	95	49	59	42	156	230	250	7.0597	6.33116	6.76443	6.16518	7.53657	7.55083	7.43822
ENSMUSG00000034854	73822	Mfsd12	major facilitator superfamily domain containing 12	protein_coding	1.82764	3.2934	0.000989822	0.00942022	313	304	326	330	789	665	1435	8.5866	8.5642	8.94509	8.66495	9.71333	8.95403	9.78041
ENSMUSG00000028540	67728	Dph2	DPH2 homolog	protein_coding	1.63386	3.29293	0.0009915	0.00943326	128	121	81	106	178	337	373	7.42256	7.36847	7.13561	7.19734	7.70364	8.04164	7.94786
ENSMUSG00000021069	110095	Pygl	liver glycogen phosphorylase	protein_coding	2.53004	3.29192	0.000995053	0.00946412	456	369	316	360	2010	823	1346	9.09988	8.82699	8.90246	8.78311	11.0357	9.24754	9.69077
ENSMUSG00000029299	27405	Abcg3	ATP binding cassette subfamily G member 3	protein_coding	2.41733	3.29079	0.000999069	0.00949937	17	18	28	28	82	77	109	5.36189	5.41541	5.98102	5.77906	6.76409	6.28526	6.46946
ENSMUSG00000045377	67020	Tmem88	transmembrane protein 88	protein_coding	1.92393	3.28995	0.00100204	0.00951577	276	140	116	185	440	598	613	8.41748	7.55035	7.5784	7.89681	8.90458	8.80892	8.60729
ENSMUSG00000021338	68732	Carmil1	capping protein regulator and myosin 1 linker 1	protein_coding	1.91046	3.28905	0.00100526	0.00954346	174	259	143	128	343	544	812	7.81111	8.34934	7.8455	7.42885	8.56627	8.68029	8.99015
ENSMUSG00000034616	245857	Ssh3	slingshot protein phosphatase 3	protein_coding	1.52848	3.2866	0.00101404	0.00962078	742	572	455	510	976	1482	1857	9.77658	9.43091	9.40517	9.26135	10.0118	10.0693	10.1429
ENSMUSG00000030254	58186	Rad18	RAD18 E3 ubiquitin protein ligase	protein_coding	1.66993	3.28631	0.00101511	0.00962375	97	98	76	72	159	272	278	7.08454	7.11185	7.0594	6.74317	7.56054	7.76393	7.57121
ENSMUSG00000040528	380732	Milr1	mast cell immunoglobulin like receptor 1	protein_coding	3.50332	3.28621	0.00101546	0.00962375	72	47	47	63	499	151	183	6.73743	6.28774	6.51119	6.5936	9.0772	7.03585	7.05824
ENSMUSG00000042659	66412	Arrdc4	arrestin domain containing 4	protein_coding	1.96505	3.28617	0.0010156	0.00962375	1157	537	631	572	1837	2468	2591	10.4025	9.34324	9.86192	9.42046	10.9075	10.7914	10.6142
ENSMUSG00000037957	69641	Wdr20	WD repeat domain 20	protein_coding	1.5839	3.28598	0.00101628	0.00962521	211	241	225	211	388	560	829	8.06161	8.25353	8.44239	8.06825	8.73313	8.71962	9.01859
ENSMUSG00000031828	234796	Klhl36	kelch-like 36	protein_coding	1.65779	3.28517	0.00101921	0.00964296	123	126	69	100	205	286	356	7.37318	7.41862	6.94531	7.12707	7.88516	7.82845	7.88733
ENSMUSG00000036435	69940	Exoc1	exocyst complex component 1	protein_coding	1.34443	3.28484	0.00102039	0.00965119	510	534	417	511	760	1134	1388	9.25435	9.33547	9.28421	9.26407	9.66095	9.69354	9.73377
ENSMUSG00000024215	30051	Spdef	SAM pointed domain containing ets transcription factor	protein_coding	7.4897	3.28408	0.00102315	0.00967134	3	3	8	2	62	8	75	4.41788	4.42245	4.99734	4.28573	6.45442	4.62045	6.08348
ENSMUSG00000047414	399558	Flrt2	fibronectin leucine rich transmembrane protein 2	protein_coding	1.66205	3.28394	0.00102367	0.00967213	257	294	288	357	619	690	1166	8.32225	8.51915	8.77588	8.77172	9.37507	9.00464	9.49043
ENSMUSG00000059456	19229	Ptk2b	PTK2 protein tyrosine kinase 2 beta	protein_coding	1.70448	3.28389	0.00102387	0.00967213	717	598	390	570	1421	1563	1559	9.72858	9.49276	9.19164	9.4156	10.5427	10.1443	9.89668
ENSMUSG00000022015	21943	Tnfsf11	tumor necrosis factor (ligand) superfamily, member 11	protein_coding	11.965	3.28331	0.00102595	0.00968878	4	8	0	9	192	16	19	4.52938	4.87298	3.67762	4.93682	7.80063	4.9892	4.98827
ENSMUSG00000042842	20708	Serpinb6b	serine (or cysteine) peptidase inhibitor, clade B, member 6b	protein_coding	3.71851	3.28166	0.00103197	0.00973963	12	12	6	18	87	31	83	5.11432	5.1227	4.82993	5.40958	6.83186	5.45269	6.18462
ENSMUSG00000038280	14628	Ostm1	osteopetrosis associated transmembrane protein 1	protein_coding	1.4905	3.28134	0.00103314	0.00974384	761	670	635	716	1448	1583	1976	9.81202	9.65135	9.87079	9.73371	10.5694	10.1622	10.2305
ENSMUSG00000027800	17112	Tm4sf1	transmembrane 4 superfamily member 1	protein_coding	2.2277	3.28128	0.00103337	0.00974384	672	948	483	827	3018	1644	2700	9.63794	10.1387	9.48822	9.93589	11.6163	10.2156	10.6727
ENSMUSG00000023947	18037	Nfkbie	nuclear factor of kappa light polypeptide gene enhancer in B cells inhibitor, epsilon	protein_coding	3.16965	3.28081	0.00103511	0.00975425	135	58	97	157	797	325	402	7.48894	6.51117	7.35518	7.68594	9.72745	7.99425	8.04557
ENSMUSG00000067586	13610	S1pr3	sphingosine-1-phosphate receptor 3	protein_coding	2.45398	3.28041	0.00103655	0.00976483	211	182	91	193	803	433	594	8.06161	7.88538	7.27676	7.95178	9.73795	8.37318	8.56479
ENSMUSG00000084230		Gm14388	predicted gene 14388	processed_pseudogene	3.72095	3.27988	0.00103853	0.00978049	12	40	5	15	99	79	135	5.11432	6.12388	4.73396	5.27283	6.98234	6.31191	6.70551
ENSMUSG00000109901	67064	Chmp1b	charged multivesicular body protein 1B	protein_coding	1.45148	3.27834	0.0010442	0.00982324	1163	942	957	943	1754	2583	2831	10.4098	10.1298	10.4494	10.1207	10.8417	10.8562	10.74
ENSMUSG00000024965	108101	Fermt3	fermitin family member 3	protein_coding	2.85978	3.2775	0.00104731	0.00984205	590	242	327	401	2428	1067	1337	9.45651	8.25902	8.94929	8.93035	11.3053	9.60843	9.68139
ENSMUSG00000112226		Gm48786	predicted gene, 48786	processed_pseudogene	35.1818	3.2774	0.00104769	0.00984255	0	0	0	0	10	14	6	3.67762	3.67762	3.67762	3.67762	4.9331	4.90942	4.43114
ENSMUSG00000025171	226122	Ubtd1	ubiquitin domain containing 1	protein_coding	1.53762	3.27707	0.00104892	0.0098511	951	633	650	754	1391	1820	2457	10.1254	9.57203	9.90357	9.80616	10.5124	10.3594	10.5389
ENSMUSG00000025903	18777	Lypla1	lysophospholipase 1	protein_coding	2.01716	3.27682	0.00104982	0.00985658	269	485	411	294	911	979	1832	8.38313	9.20226	9.26414	8.50904	9.91493	9.48843	10.1238
ENSMUSG00000021408	19766	Ripk1	receptor (TNFRSF)-interacting serine-threonine kinase 1	protein_coding	1.84187	3.27518	0.00105596	0.00990808	423	319	404	400	1151	977	1248	8.99662	8.62924	9.24038	8.92693	10.2444	9.48558	9.58516
ENSMUSG00000073555	240327	Gm4951	predicted gene 4951	protein_coding	3.54515	3.27482	0.00105728	0.00991443	106	48	83	77	687	186	311	7.19122	6.30962	7.16499	6.81984	9.52002	7.28718	7.71355
ENSMUSG00000074238	211556	Ap1ar	adaptor-related protein complex 1 associated regulatory protein	protein_coding	1.434	3.2742	0.00105961	0.00993327	377	428	328	372	638	847	1192	8.83909	9.03002	8.95347	8.82778	9.41706	9.28732	9.52114
ENSMUSG00000005125	17988	Ndrg1	N-myc downstream regulated gene 1	protein_coding	2.24225	3.27333	0.00106287	0.00994699	3960	2141	2093	2735	11446	7746	8224	12.1583	11.2958	11.564	11.6352	13.5308	12.4273	12.2644
ENSMUSG00000026807	68870	Ak8	adenylate kinase 8	protein_coding	3.11643	3.27322	0.00106328	0.00994699	6	12	7	8	22	55	53	4.71362	5.1227	4.91713	4.86873	5.47967	5.95127	5.75777
ENSMUSG00000026005	66646	Rpe	ribulose-5-phosphate-3-epimerase	protein_coding	1.62462	3.27316	0.00106353	0.00994699	263	384	296	339	676	759	1127	8.35301	8.88138	8.81319	8.70143	9.49754	9.13575	9.44309
ENSMUSG00000025616	74112	Usp16	ubiquitin specific peptidase 16	protein_coding	1.48779	3.27314	0.00106358	0.00994699	500	622	424	570	946	1175	1768	9.22697	9.54758	9.30726	9.4156	9.96793	9.74325	10.0737
ENSMUSG00000003849	18104	Nqo1	NAD(P)H dehydrogenase, quinone 1	protein_coding	1.61505	3.27264	0.00106548	0.00996084	253	252	257	267	441	632	1043	8.30137	8.31284	8.6214	8.37992	8.90768	8.88438	9.33553
ENSMUSG00000027293	98878	Ehd4	EH-domain containing 4	protein_coding	1.60965	3.27109	0.00107134	0.0100065	2666	1620	1845	1988	4140	5260	6615	11.5914	10.8982	11.3837	11.1793	12.0691	11.8721	11.9521
ENSMUSG00000117605		Gm50097	predicted gene, 50097	lincRNA	33.9107	3.26968	0.00107668	0.0100441	0	0	0	0	10	6	14	3.67762	3.67762	3.67762	3.67762	4.9331	4.49766	4.8123
ENSMUSG00000081405		Gm13142	predicted gene 13142	processed_pseudogene	26.4545	3.26927	0.00107827	0.0100558	1	0	0	0	6	8	29	4.10811	3.67762	3.67762	3.67762	4.66189	4.62045	5.2709
ENSMUSG00000036452	71302	Arhgap26	Rho GTPase activating protein 26	protein_coding	2.38348	3.26649	0.00108888	0.0101359	93	65	66	73	339	175	292	7.03442	6.63661	6.89344	6.75884	8.55046	7.21288	7.63333
ENSMUSG00000045349	230863	Sh2d5	SH2 domain containing 5	protein_coding	5.45701	3.26633	0.0010895	0.0101359	78	7	14	51	418	324	108	6.82886	4.79955	5.38378	6.36531	8.83452	7.99023	6.45953
ENSMUSG00000032553	20818	Srprb	signal recognition particle receptor, B subunit	protein_coding	1.36261	3.26595	0.00109096	0.0101434	745	741	560	740	1162	1488	2011	9.78224	9.79232	9.69465	9.77989	10.2578	10.075	10.2553
ENSMUSG00000046352	14619	Gjb2	gap junction protein, beta 2	protein_coding	3.86992	3.26595	0.00109099	0.0101434	10666	2609	1182	1905	17557	32740	24111	13.5826	11.5784	10.749	11.1184	14.1469	14.5018	13.8113
ENSMUSG00000035521	214505	Gnptg	N-acetylglucosamine-1-phosphotransferase, gamma subunit	protein_coding	1.46242	3.26575	0.00109175	0.0101434	411	400	281	352	681	813	1074	8.95715	8.93722	8.74242	8.75253	9.5078	9.23063	9.37616
ENSMUSG00000020682	118453	Mmp28	matrix metallopeptidase 28 (epilysin)	protein_coding	1.87764	3.26569	0.00109196	0.0101434	95	135	86	90	172	310	497	7.0597	7.50468	7.20794	7.0016	7.65998	7.93273	8.32581
ENSMUSG00000026696	53330	Vamp4	vesicle-associated membrane protein 4	protein_coding	1.84325	3.26559	0.00109238	0.0101442	338	388	370	451	1114	832	1471	8.69056	8.89555	9.11903	9.09166	10.1983	9.26258	9.81514
ENSMUSG00000044456	217835	Rin3	Ras and Rab interactor 3	protein_coding	2.19054	3.26515	0.00109405	0.0101505	202	154	114	211	682	425	575	8.00458	7.67095	7.55648	8.06825	9.50985	8.34829	8.521
ENSMUSG00000018654	22778	Ikzf1	IKAROS family zinc finger 1	protein_coding	2.68573	3.26425	0.00109752	0.0101766	90	63	78	85	453	196	292	6.99563	6.60191	7.09038	6.93444	8.94443	7.35153	7.63333
ENSMUSG00000049792	70369	Bag5	BCL2-associated athanogene 5	protein_coding	1.4159	3.26413	0.001098	0.0101779	417	486	348	433	704	948	1296	8.97702	9.2051	9.03468	9.03565	9.55409	9.44365	9.63785
ENSMUSG00000022489	18574	Pde1b	phosphodiesterase 1B, Ca2+-calmodulin dependent	protein_coding	2.72602	3.26334	0.00110107	0.0102033	94	53	61	99	422	286	207	7.04712	6.41408	6.80251	7.11501	8.84751	7.82845	7.20629
ENSMUSG00000114277		Gm48583	predicted gene, 48583	processed_pseudogene	1.87587	3.26001	0.00111409	0.0103115	349	484	250	234	615	1168	1307	8.73403	9.19941	8.5841	8.20452	9.36607	9.73488	9.64966
ENSMUSG00000021196	56421	Pfkp	phosphofructokinase, platelet	protein_coding	1.67302	3.25878	0.00111891	0.0103467	2409	1538	1251	1702	3807	5037	4936	11.4464	10.8243	10.8297	10.9578	11.9489	11.81	11.5329
ENSMUSG00000025823	12304	Pdia4	protein disulfide isomerase associated 4	protein_coding	1.79908	3.25673	0.00112702	0.0104154	1513	1018	949	1153	3347	2976	3385	10.7831	10.2393	10.4375	10.4047	11.7644	11.0579	10.9944
ENSMUSG00000031360	55936	Ctps2	cytidine 5'-triphosphate synthase 2	protein_coding	1.81028	3.25596	0.00113008	0.0104311	237	288	209	280	731	553	884	8.21468	8.49143	8.34377	8.44354	9.6066	8.70255	9.10694
ENSMUSG00000080968		Atf1-ps	activating transcription factor 1, pseudogene	processed_pseudogene	3.25117	3.25552	0.00113184	0.0104442	6	14	18	8	51	47	91	4.71362	5.22876	5.58497	4.86873	6.24906	5.80557	6.27873
ENSMUSG00000029038	68991	Ssu72	Ssu72 RNA polymerase II CTD phosphatase homolog (yeast)	protein_coding	1.48358	3.25532	0.00113263	0.0104474	1693	1724	1347	1485	3243	3455	4468	10.9431	10.9868	10.9349	10.7638	11.7192	11.2708	11.3905
ENSMUSG00000043613	17392	Mmp3	matrix metallopeptidase 3	protein_coding	6.92198	3.25362	0.00113946	0.0105051	3957	1019	1521	3069	42618	10996	12908	12.1572	10.2407	11.108	11.8001	15.4251	12.9308	12.9121
ENSMUSG00000025982	81898	Sf3b1	splicing factor 3b, subunit 1	protein_coding	1.39131	3.25218	0.00114524	0.0105456	2182	2627	1924	2375	4039	5037	6398	11.305	11.5883	11.4436	11.4333	12.0337	11.81	11.9043
ENSMUSG00000027843	19260	Ptpn22	protein tyrosine phosphatase, non-receptor type 22 (lymphoid)	protein_coding	2.69777	3.25135	0.00114857	0.0105731	36	23	27	36	163	86	122	6.00832	5.61422	5.94641	6.0132	7.59188	6.4013	6.59248
ENSMUSG00000035929	15015	H2-Q4	histocompatibility 2, Q region locus 4	protein_coding	2.39438	3.25046	0.00115217	0.010603	1608	1618	1103	1207	6810	3041	4801	10.8698	10.8965	10.6507	10.4696	12.7838	11.0887	11.4932
ENSMUSG00000015312	17873	Gadd45b	growth arrest and DNA-damage-inducible 45 beta	protein_coding	2.05912	3.24851	0.00116013	0.0106641	946	840	685	883	2874	3143	1828	10.118	9.96839	9.97729	10.0281	11.5463	11.1358	10.1207
ENSMUSG00000027994	66815	Mcub	mitochondrial calcium uniporter dominant negative beta subunit	protein_coding	1.9979	3.24791	0.00116257	0.0106795	280	200	243	276	875	637	802	8.43675	8.00802	8.54581	8.42426	9.85832	8.89515	8.97316
ENSMUSG00000032068	76509	Plet1	placenta expressed transcript 1	protein_coding	2.38612	3.24697	0.0011664	0.0107051	671	470	564	497	2670	1660	1515	9.63586	9.15889	9.70461	9.22564	11.4411	10.2293	9.85649
ENSMUSG00000025964	23792	Adam23	a disintegrin and metallopeptidase domain 23	protein_coding	2.09391	3.24633	0.00116902	0.0107204	163	139	100	119	204	399	830	7.72734	7.54133	7.39283	7.33864	7.87884	8.26429	9.02025
ENSMUSG00000038884	319278	Shfl	shiftless antiviral inhibitor of ribosomal frameshifting	protein_coding	1.67777	3.24586	0.00117096	0.0107304	141	152	110	153	340	312	466	7.54348	7.65433	7.5116	7.65311	8.55443	7.94109	8.24023
ENSMUSG00000031169	53627	Porcn	porcupine O-acyltransferase	protein_coding	1.8308	3.24584	0.00117103	0.0107304	363	293	209	197	567	1001	791	8.78752	8.51457	8.34377	7.97849	9.25347	9.51938	8.95423
ENSMUSG00000081723		Gm15931	predicted gene 15931	unprocessed_pseudogene	28.2843	3.24579	0.00117126	0.0107304	2	0	0	0	37	5	17	4.28421	3.67762	3.67762	3.67762	5.9328	4.42785	4.92156
ENSMUSG00000038806	208768	Sde2	SDE2 telomere maintenance homolog (S. pombe)	protein_coding	1.58102	3.24493	0.00117481	0.010759	303	321	290	326	718	765	863	8.54281	8.6377	8.7853	8.64844	9.58156	9.1466	9.07384
ENSMUSG00000027900	67171	Dram2	DNA-damage regulated autophagy modulator 2	protein_coding	1.85682	3.24486	0.00117508	0.010759	421	487	441	531	1330	948	1937	8.99011	9.20794	9.36177	9.31724	10.4489	9.44365	10.2024
ENSMUSG00000020122	13649	Egfr	epidermal growth factor receptor	protein_coding	1.4733	3.2445	0.00117657	0.0107694	958	896	661	780	1632	1831	2404	10.1358	10.0592	9.92715	9.85371	10.7392	10.3679	10.508
ENSMUSG00000039183	26426	Nubp2	nucleotide binding protein 2	protein_coding	1.47386	3.24422	0.00117771	0.0107766	682	517	438	512	977	1313	1581	9.65858	9.29063	9.3523	9.26677	10.0133	9.89898	9.91637
ENSMUSG00000037031	70423	Tspan15	tetraspanin 15	protein_coding	1.66173	3.2419	0.00118738	0.0108586	190	179	162	242	460	451	633	7.92484	7.86388	8.00749	8.24905	8.96544	8.42765	8.65071
ENSMUSG00000050106	217356	Tmc8	transmembrane channel-like gene family 8	protein_coding	2.40269	3.24081	0.0011919	0.0108837	32	19	14	17	73	76	84	5.89661	5.45783	5.38378	5.36573	6.63317	6.27174	6.19674
ENSMUSG00000031389	171207	Arhgap4	Rho GTPase activating protein 4	protein_coding	3.1044	3.23992	0.00119565	0.0109136	157	94	49	102	683	246	396	7.67949	7.06208	6.55672	7.15088	9.51189	7.63579	8.02589
ENSMUSG00000028480	384009	Glipr2	GLI pathogenesis-related 2	protein_coding	3.09629	3.23811	0.00120326	0.0109678	323	148	230	306	1796	547	1021	8.62909	7.6205	8.47187	8.56291	10.8754	8.68775	9.30598
ENSMUSG00000007777	66050	0610009B22Rik	RIKEN cDNA 0610009B22 gene	protein_coding	1.60114	3.23789	0.00120416	0.0109695	208	286	210	218	416	570	866	8.04285	8.48207	8.35014	8.11111	8.82797	8.74366	9.07862
ENSMUSG00000025089	14585	Gfra1	glial cell line derived neurotrophic factor family receptor alpha 1	protein_coding	2.66304	3.23654	0.0012099	0.0110087	162	218	172	210	1107	408	714	7.71947	8.121	8.08592	8.06202	10.1894	8.29393	8.81427
ENSMUSG00000032584	19882	Mst1r	macrophage stimulating 1 receptor (c-met-related tyrosine kinase)	protein_coding	1.46446	3.23633	0.00121076	0.0110133	440	354	313	392	625	1054	1018	9.05073	8.77047	8.88941	8.89929	9.38846	9.59132	9.3019
ENSMUSG00000050910	237988	Cdr2l	cerebellar degeneration-related protein 2-like	protein_coding	1.57846	3.23618	0.0012114	0.0110159	216	177	145	184	399	428	542	8.09234	7.84936	7.86344	7.88979	8.77114	8.35767	8.44163
ENSMUSG00000026193	14268	Fn1	fibronectin 1	protein_coding	2.19499	3.2353	0.00121514	0.0110466	2974	2162	2443	2719	3740	8004	18757	11.7478	11.3098	11.7854	11.6268	11.9235	12.4744	13.4497
ENSMUSG00000026822	16819	Lcn2	lipocalin 2	protein_coding	7.78701	3.23515	0.0012158	0.0110493	2602	200	1686	1218	28750	7600	10230	11.5566	8.00802	11.255	10.4824	14.8576	12.4	12.5778
ENSMUSG00000029321	75750	Slc10a6	solute carrier family 10 (sodium/bile acid cotransporter family), member 6	protein_coding	2.63071	3.23503	0.00121629	0.0110504	394	106	142	175	804	941	742	8.89933	7.20645	7.83645	7.82501	9.73969	9.43335	8.86675
ENSMUSG00000062743	210503	Zfp677	zinc finger protein 677	protein_coding	3.65674	3.23444	0.0012188	0.0110667	15	13	5	3	37	41	86	5.26916	5.17698	4.73396	4.41971	5.9328	5.68447	6.22068
ENSMUSG00000054690	59308	Emcn	endomucin	protein_coding	2.10967	3.23427	0.00121954	0.0110702	570	253	253	402	1233	1145	1224	9.40856	8.31811	8.6002	8.93376	10.3417	9.70704	9.55807
ENSMUSG00000030780	233913	BC017158	cDNA sequence BC017158	protein_coding	1.47849	3.23371	0.00122195	0.0110887	233	255	181	212	353	544	729	8.19217	8.3286	8.15303	8.07445	8.60506	8.68029	8.84262
ENSMUSG00000025534	110006	Gusb	glucuronidase, beta	protein_coding	1.84764	3.23225	0.00122818	0.011142	972	623	832	849	2431	2169	2551	10.1563	9.54982	10.2514	9.9728	11.3071	10.608	10.5921
ENSMUSG00000079037	19122	Prnp	prion protein	protein_coding	1.49709	3.23157	0.00123114	0.0111655	3227	3299	2738	3464	4716	7660	11881	11.8648	11.9144	11.9487	11.9736	12.256	12.4113	12.7929
ENSMUSG00000047562	17384	Mmp10	matrix metallopeptidase 10	protein_coding	53.5681	3.23142	0.00123176	0.0111678	11	3	0	38	2186	101	145	5.0575	4.42245	3.67762	6.06579	11.1554	6.57534	6.78664
ENSMUSG00000027803	97064	Wwtr1	WW domain containing transcription regulator 1	protein_coding	1.38272	3.23124	0.00123256	0.0111718	910	803	614	836	1295	1736	2354	10.0633	9.90507	9.8236	9.9511	10.4111	10.2925	10.4782
ENSMUSG00000032661	246727	Oas3	2'-5' oligoadenylate synthetase 3	protein_coding	3.86413	3.23091	0.00123397	0.0111779	147	45	70	74	814	203	331	7.59601	6.24291	6.96218	6.77434	9.757	7.3949	7.79339
ENSMUSG00000038067	12985	Csf3	colony stimulating factor 3 (granulocyte)	protein_coding	71.8174	3.23039	0.00123623	0.011192	3	0	16	49	4120	100	243	4.41788	3.67762	5.4885	6.3233	12.0622	6.56439	7.40294
ENSMUSG00000032096	213827	Arcn1	archain 1	protein_coding	1.39154	3.2298	0.00123875	0.0111979	1445	1473	1237	1542	2555	2967	4186	10.7178	10.7629	10.8137	10.8173	11.3781	11.0536	11.2973
ENSMUSG00000048076	11840	Arf1	ADP-ribosylation factor 1	protein_coding	1.4102	3.22973	0.00123909	0.0111979	6004	4694	3967	4838	8317	12155	13103	12.756	12.4204	12.4808	12.453	13.0713	13.0749	12.9336
ENSMUSG00000027104	11909	Atf2	activating transcription factor 2	protein_coding	1.55379	3.22961	0.00123959	0.011198	244	302	236	320	544	618	944	8.25325	8.55531	8.50647	8.62331	9.19623	8.85379	9.19751
ENSMUSG00000056144	94094	Trim34a	tripartite motif-containing 34A	protein_coding	2.10653	3.22942	0.00124041	0.0111998	52	70	47	54	202	147	197	6.38048	6.71978	6.51119	6.42601	7.86609	7.00407	7.14647
ENSMUSG00000024242	225028	Map4k3	mitogen-activated protein kinase kinase kinase kinase 3	protein_coding	1.72069	3.22854	0.00124422	0.0112277	214	302	214	253	431	613	1113	8.08013	8.55531	8.37532	8.3081	8.87633	8.8427	9.42571
ENSMUSG00000049414		Gm5417	predicted gene 5417	processed_pseudogene	2.7588	3.22731	0.00124961	0.011273	9	17	15	14	42	46	106	4.93383	5.37144	5.43727	5.22344	6.05448	5.78616	6.43945
ENSMUSG00000059994	229499	Fcrl1	Fc receptor-like 1	protein_coding	36.3063	3.22608	0.00125496	0.0113146	0	0	0	0	13	4	14	3.67762	3.67762	3.67762	3.67762	5.09678	4.35012	4.8123
ENSMUSG00000031749	20444	St3gal2	ST3 beta-galactoside alpha-2,3-sialyltransferase 2	protein_coding	1.60616	3.22189	0.0012735	0.0114716	627	534	604	690	1172	1384	2397	9.54121	9.33547	9.80057	9.68196	10.2699	9.973	10.5038
ENSMUSG00000022357	268807	Klhl38	kelch-like 38	protein_coding	3.28573	3.22142	0.00127555	0.0114867	24	69	46	111	343	150	478	5.63968	6.70353	6.48786	7.25336	8.56627	7.02797	8.27397
ENSMUSG00000022634	67057	Yaf2	YY1 associated factor 2	protein_coding	1.67463	3.22114	0.00127684	0.0114949	201	235	138	199	342	466	818	7.99811	8.22012	7.79965	7.99166	8.56234	8.47152	9.00026
ENSMUSG00000022686	108105	B3gnt5	UDP-GlcNAc:betaGal beta-1,3-N-acetylglucosaminyltransferase 5	protein_coding	7.59718	3.22075	0.00127856	0.0115016	3	7	7	7	140	21	17	4.41788	4.79955	4.91713	4.79554	7.40149	5.16567	4.92156
ENSMUSG00000115070		Gm4740	predicted gene 4740	processed_pseudogene	2.81747	3.22072	0.0012787	0.0115016	13	26	8	12	46	55	106	5.16834	5.71991	4.99734	5.11769	6.14443	5.95127	6.43945
ENSMUSG00000036644	76795	Tbc1d9b	TBC1 domain family, member 9B	protein_coding	1.5483	3.22045	0.00127991	0.0115091	948	748	730	970	1751	1819	2849	10.121	9.8055	10.0669	10.1605	10.8393	10.3586	10.7491
ENSMUSG00000055371	56324	Stam2	signal transducing adaptor molecule (SH3 domain and ITAM motif) 2	protein_coding	1.82667	3.22014	0.00128127	0.0115167	811	422	433	443	1036	1844	1889	9.90133	9.01063	9.33638	9.06704	10.0959	10.3779	10.167
ENSMUSG00000026836	11477	Acvr1	activin A receptor, type 1	protein_coding	1.7317	3.2186	0.00128816	0.0115683	219	248	236	208	461	524	1014	8.11047	8.29155	8.50647	8.04948	8.96841	8.62958	9.29645
ENSMUSG00000063568	231986	Jazf1	JAZF zinc finger 1	protein_coding	2.54701	3.21855	0.00128839	0.0115683	19	10	20	24	61	60	110	5.44789	5.00528	5.67453	5.644	6.43697	6.03479	6.47932
ENSMUSG00000003226	19386	Ranbp2	RAN binding protein 2	protein_coding	1.57493	3.21813	0.00129031	0.0115821	689	957	660	817	1611	1714	2697	9.67285	10.1521	9.92502	9.91879	10.7208	10.2745	10.6712
ENSMUSG00000056492	224792	Adgrf5	adhesion G protein-coupled receptor F5	protein_coding	1.81384	3.21539	0.00130267	0.0116855	759	521	422	774	1652	1405	2270	9.80833	9.30131	9.30071	9.84288	10.7565	9.99418	10.4267
ENSMUSG00000031266	11605	Gla	galactosidase, alpha	protein_coding	2.28272	3.21533	0.00130296	0.0116855	206	139	147	270	800	601	550	8.03021	7.54133	7.88116	8.39485	9.73271	8.81574	8.46128
ENSMUSG00000046794	244416	Ppp1r3b	protein phosphatase 1, regulatory subunit 3B	protein_coding	4.2758	3.21521	0.00130349	0.0116868	81	170	23	71	887	274	326	6.87244	7.79738	5.79807	6.72732	9.87744	7.77333	7.77385
ENSMUSG00000044906	269033	4930503L19Rik	RIKEN cDNA 4930503L19 gene	protein_coding	2.8315	3.2145	0.00130671	0.0117088	21	34	15	38	127	63	168	5.5282	5.9656	5.43727	6.06579	7.28146	6.0825	6.95718
ENSMUSG00000020108	74747	Ddit4	DNA-damage-inducible transcript 4	protein_coding	1.94721	3.2138	0.00130992	0.0117341	1789	1531	1229	1508	5287	4042	4033	11.0217	10.8178	10.8045	10.7856	12.4201	11.4951	11.2442
ENSMUSG00000060470	54672	Adgrg3	adhesion G protein-coupled receptor G3	protein_coding	2.85055	3.21345	0.00131151	0.0117363	46	27	16	20	140	115	92	6.25256	5.75328	5.4885	5.49277	7.40149	6.72021	6.29005
ENSMUSG00000064289	21353	Tank	TRAF family member-associated Nf-kappa B activator	protein_coding	1.83914	3.21341	0.00131169	0.0117363	176	200	182	235	487	411	907	7.82583	8.00802	8.1603	8.21017	9.04372	8.30367	9.14233
ENSMUSG00000028019	54635	Pdgfc	platelet-derived growth factor, C polypeptide	protein_coding	2.22933	3.2112	0.00132181	0.0118178	61	96	111	82	246	223	528	6.55251	7.08718	7.52295	6.89255	8.12319	7.51201	8.40659
ENSMUSG00000026721	29809	Rabgap1l	RAB GTPase activating protein 1-like	protein_coding	1.77056	3.21114	0.0013221	0.0118178	632	412	364	380	722	1621	1649	9.55228	8.97773	9.09651	8.85681	9.58931	10.1957	9.97557
ENSMUSG00000018167	59045	Stard3	START domain containing 3	protein_coding	1.4792	3.21056	0.00132478	0.0118327	494	483	381	489	960	1084	1226	9.21028	9.19655	9.15942	9.20322	9.98859	9.63051	9.56035
ENSMUSG00000003161	109552	Sri	sorcin	protein_coding	1.52249	3.20961	0.00132913	0.0118546	1430	1117	1059	1226	2613	2797	3416	10.7029	10.3705	10.593	10.4917	11.4102	10.9695	11.0074
ENSMUSG00000010476	13593	Ebf3	early B cell factor 3	protein_coding	1.75156	3.20905	0.00133174	0.0118706	91	80	62	126	194	249	323	7.00868	6.87262	6.82117	7.40929	7.81396	7.65118	7.76199
ENSMUSG00000048779	233571	P2ry6	pyrimidinergic receptor P2Y, G-protein coupled, 6	protein_coding	2.74248	3.20884	0.00133273	0.011876	318	125	244	229	1289	560	987	8.608	7.40873	8.55134	8.17598	10.4045	8.71962	9.25909
ENSMUSG00000043207	230709	Zmpste24	zinc metallopeptidase, STE24	protein_coding	1.43848	3.208	0.00133664	0.0119073	473	453	395	554	856	1037	1409	9.15032	9.10811	9.20924	9.37605	9.82752	9.56863	9.75479
ENSMUSG00000022971	15976	Ifnar2	interferon (alpha and beta) receptor 2	protein_coding	2.41371	3.20789	0.00133713	0.0119083	580	266	388	475	2008	1077	1566	9.43274	8.38495	9.18454	9.16312	11.0343	9.62146	9.90298
ENSMUSG00000040383	11834	Aqr	aquarius	protein_coding	1.39284	3.20748	0.00133903	0.0119218	388	427	294	384	581	922	1067	8.87836	9.02681	8.80395	8.87111	9.28723	9.405	9.36709
ENSMUSG00000041827	231655	Oasl1	2'-5' oligoadenylate synthetase-like 1	protein_coding	2.95923	3.20572	0.00134723	0.0119774	138	35	91	57	426	264	422	7.51647	5.99331	7.27676	6.48415	8.86039	7.72571	8.10928
ENSMUSG00000035206	73218	Sppl2b	signal peptide peptidase like 2B	protein_coding	1.45756	3.20511	0.00135013	0.0119927	368	385	309	425	666	801	1206	8.80615	8.88494	8.87184	9.01004	9.47679	9.21008	9.53742
ENSMUSG00000072294	16597	Klf12	Kruppel-like factor 12	protein_coding	2.30031	3.20431	0.00135384	0.0120222	19	13	21	22	44	86	87	5.44789	5.17698	5.71705	5.57068	6.1002	6.4013	6.23249
ENSMUSG00000002733	83435	Plekha3	pleckstrin homology domain-containing, family A (phosphoinositide binding specific) member 3	protein_coding	2.4568	3.20417	0.00135454	0.0120249	56	135	84	97	406	228	431	6.45959	7.50468	7.17945	7.09058	8.79482	7.53985	8.13706
ENSMUSG00000115160		Gm6532	predicted pseudogene 6532	unprocessed_pseudogene	3.61514	3.20128	0.00136818	0.0121319	4	10	20	10	59	48	94	4.52938	5.00528	5.67453	5.00063	6.40138	5.82469	6.31241
ENSMUSG00000032028	78252	Nxpe2	neurexophilin and PC-esterase domain family, member 2	protein_coding	2.57844	3.20078	0.00137055	0.0121459	20	11	14	9	45	62	63	5.4887	5.06559	5.38378	4.93682	6.1225	6.06679	5.91584
ENSMUSG00000040323		Gm15429	predicted pseudogene 15429	processed_pseudogene	1.53567	3.19946	0.00137684	0.0121946	462	432	290	322	642	1049	1162	9.11788	9.0428	8.7853	8.63174	9.42574	9.58468	9.48564
ENSMUSG00000014550	78287	Rbsn	rabenosyn, RAB effector	protein_coding	1.61312	3.19932	0.00137751	0.012197	544	376	286	365	677	1113	1351	9.34375	8.85263	8.7664	8.80189	9.4996	9.6674	9.69596
ENSMUSG00000031304	16186	Il2rg	interleukin 2 receptor, gamma chain	protein_coding	2.96895	3.19814	0.00138318	0.0122331	395	179	246	290	1903	796	804	8.9028	7.86388	8.56234	8.49063	10.9578	9.20143	8.97657
ENSMUSG00000103921		Gm5841	predicted gene 5841	processed_pseudogene	10.2085	3.19743	0.00138658	0.0122596	0	4	1	0	13	18	34	3.67762	4.5346	4.15842	3.67762	5.09678	5.06329	5.38959
ENSMUSG00000021701	20620	Plk2	polo like kinase 2	protein_coding	1.73873	3.19719	0.00138775	0.0122624	526	679	453	372	1174	1282	1857	9.29712	9.67	9.39905	8.82778	10.2724	9.86543	10.1429
ENSMUSG00000118220		Gm6192	predicted gene 6192	processed_pseudogene	1.87604	3.19708	0.00138828	0.0122624	94	118	68	65	231	262	278	7.04712	7.33751	6.92823	6.62825	8.04062	7.71599	7.57121
ENSMUSG00000035517	100121	Tdrd7	tudor domain containing 7	protein_coding	1.58671	3.19703	0.0013885	0.0122624	303	333	243	342	707	679	927	8.54281	8.6874	8.54581	8.71338	9.56002	8.98259	9.17242
ENSMUSG00000024544	52662	Ldlrad4	low density lipoprotein receptor class A domain containing 4	protein_coding	2.18528	3.19621	0.00139247	0.0122904	61	44	71	72	144	167	391	6.55251	6.21992	6.97886	6.74317	7.43648	7.15629	8.00929
ENSMUSG00000022367	15117	Has2	hyaluronan synthase 2	protein_coding	3.52744	3.19589	0.00139403	0.0122975	7	35	17	25	142	66	130	4.79285	5.99331	5.53768	5.67913	7.41909	6.12858	6.66311
ENSMUSG00000009687	18301	Fxyd5	FXYD domain-containing ion transport regulator 5	protein_coding	2.82529	3.19588	0.00139407	0.0122975	1998	892	1124	1641	8936	3780	4354	11.1792	10.0529	10.6775	10.9059	13.1745	11.3993	11.3536
ENSMUSG00000051412	20955	Vamp7	vesicle-associated membrane protein 7	protein_coding	2.02573	3.19413	0.00140254	0.012365	91	123	112	153	348	260	580	7.00868	7.38874	7.53422	7.65311	8.5858	7.70621	8.53266
ENSMUSG00000000958	20540	Slc7a7	solute carrier family 7 (cationic amino acid transporter, y+ system), member 7	protein_coding	2.42839	3.1939	0.00140364	0.0123712	150	78	95	136	546	314	385	7.62157	6.84335	7.32952	7.50451	9.20129	7.94939	7.9891
ENSMUSG00000078452	19368,19369,19370,56554	Raet1d	retinoic acid early transcript delta	protein_coding	13.004	3.19353	0.00140545	0.0123836	0	3	1	0	28	17	12	3.67762	4.42245	4.15842	3.67762	5.68058	5.02689	4.7318
ENSMUSG00000056427	20564	Slit3	slit guidance ligand 3	protein_coding	1.53996	3.19298	0.00140813	0.0124036	1144	878	768	1171	1974	2167	3292	10.3865	10.0306	10.1384	10.4267	11.01	10.6067	10.9547
ENSMUSG00000087700		Gm15283	predicted gene 15283	antisense	8.57442	3.19237	0.00141112	0.0124224	4	0	3	0	26	22	23	4.52938	3.67762	4.50295	3.67762	5.61712	5.19779	5.11017
ENSMUSG00000044340	98432	Phlpp1	PH domain and leucine rich repeat protein phosphatase 1	protein_coding	1.59812	3.19217	0.00141208	0.0124224	235	199	127	163	336	477	607	8.20347	8.00147	7.69329	7.73381	8.53849	8.50286	8.594
ENSMUSG00000006005	108989	Tpr	translocated promoter region, nuclear basket protein	protein_coding	1.30684	3.19185	0.00141366	0.0124224	1891	1977	1647	1868	2923	3992	4983	11.1007	11.1821	11.2216	11.0905	11.5705	11.4773	11.5465
ENSMUSG00000047030	263876	Spata2	spermatogenesis associated 2	protein_coding	1.39337	3.19185	0.00141367	0.0124224	319	280	235	296	485	668	773	8.61224	8.45361	8.50076	8.51816	9.03807	8.9602	8.92271
ENSMUSG00000015950	17969	Ncf1	neutrophil cytosolic factor 1	protein_coding	3.06063	3.19163	0.00141473	0.0124224	544	251	536	483	3250	1120	1683	9.34375	8.30755	9.63342	9.18617	11.7223	9.67617	10.0043
ENSMUSG00000015305	70097	Sash1	SAM and SH3 domain containing 1	protein_coding	1.50719	3.19104	0.0014176	0.0124299	675	544	461	704	1204	1355	1777	9.64416	9.3612	9.42337	9.71006	10.308	9.94322	10.0808
ENSMUSG00000034738	329416	Nostrin	nitric oxide synthase trafficker	protein_coding	2.06847	3.19058	0.00141986	0.012439	62	28	30	43	95	159	159	6.57037	5.78581	6.04765	6.18892	6.93394	7.09735	6.89288
ENSMUSG00000055994	257632	Nod2	nucleotide-binding oligomerization domain containing 2	protein_coding	2.58867	3.18973	0.00142404	0.012472	142	56	78	110	487	285	343	7.55237	6.47315	7.09038	7.24233	9.04372	7.82394	7.83925
ENSMUSG00000002812	14248	Flii	flightless I actin binding protein	protein_coding	1.36191	3.18732	0.00143597	0.0125658	2505	2071	1871	2309	3738	4765	6099	11.5023	11.2484	11.4037	11.393	11.9227	11.7305	11.8358
ENSMUSG00000040170	55990	Fmo2	flavin containing monooxygenase 2	protein_coding	2.77465	3.18543	0.00144538	0.0126408	87	197	104	174	600	245	1043	6.95575	7.98829	7.44153	7.81763	9.33182	7.63063	9.33553
ENSMUSG00000004364	26554	Cul3	cullin 3	protein_coding	1.48247	3.18207	0.00146225	0.0127702	1503	1551	1182	1398	2058	3440	5108	10.7737	10.8363	10.749	10.678	11.0694	11.2646	11.5819
ENSMUSG00000059669	21340	Taf1b	TATA-box binding protein associated factor, RNA polymerase I, B	protein_coding	1.76378	3.18045	0.00147046	0.0128273	124	209	101	158	269	479	548	7.3832	8.06562	7.40516	7.69403	8.24126	8.50849	8.45639
ENSMUSG00000036905	12260	C1qb	complement component 1, q subcomponent, beta polypeptide	protein_coding	2.79748	3.18045	0.00147046	0.0128273	6621	1768	4319	4261	23032	11693	19373	12.8966	11.0228	12.6029	12.2707	14.538	13.0192	13.4962
ENSMUSG00000021978	54616	Extl3	exostosin-like glycosyltransferase 3	protein_coding	1.46525	3.17844	0.00148069	0.0129019	1098	824	836	1103	1773	2213	2955	10.3284	9.94135	10.2581	10.342	10.8571	10.6365	10.801
ENSMUSG00000026536	381308	Ifi211	interferon activated gene 211	protein_coding	3.17856	3.17658	0.00149022	0.0129738	94	48	71	97	553	144	384	7.04712	6.30962	6.97886	7.09058	9.2189	6.97976	7.98571
ENSMUSG00000038366	16796	Lasp1	LIM and SH3 protein 1	protein_coding	1.61275	3.1745	0.00150093	0.0130559	2007	1294	1130	1377	3066	4047	4137	11.1856	10.5789	10.6851	10.6565	11.6389	11.4968	11.2805
ENSMUSG00000021390	18295	Ogn	osteoglycin	protein_coding	2.77043	3.1735	0.00150614	0.0130901	212	334	420	397	757	844	3587	8.06781	8.69147	9.29413	8.91663	9.65542	9.2824	11.077
ENSMUSG00000089961		Gm16567	predicted gene 16567	antisense	22.3847	3.17285	0.00150953	0.0131158	1	0	0	0	10	8	15	4.10811	3.67762	3.67762	3.67762	4.9331	4.62045	4.85009
ENSMUSG00000079562	59003	Maea	macrophage erythroblast attacher	protein_coding	1.45025	3.17116	0.00151832	0.0131773	1342	1429	1368	1422	2522	3035	4451	10.6127	10.7198	10.957	10.7022	11.3596	11.0859	11.385
ENSMUSG00000081126		Gm15784	predicted gene 15784	processed_pseudogene	39.5649	3.17074	0.00152053	0.013189	0	0	0	0	3	6	32	3.67762	3.67762	3.67762	3.67762	4.38022	4.49766	5.34354
ENSMUSG00000082088		Gm15753	predicted gene 15753	unprocessed_pseudogene	4.1544	3.17058	0.00152136	0.0131925	11	4	13	3	59	36	59	5.0575	4.5346	5.32778	4.41971	6.40138	5.57395	5.85489
ENSMUSG00000017707	26943	Serinc3	serine incorporator 3	protein_coding	1.75268	3.17025	0.00152306	0.0132034	4276	3757	4065	4578	11649	8808	14362	12.2684	12.1008	12.5158	12.3737	13.5561	12.6119	13.0656
ENSMUSG00000020152	66713	Actr2	ARP2 actin-related protein 2	protein_coding	1.65042	3.16912	0.00152901	0.0132507	2959	2188	2126	1861	5306	6218	6570	11.7406	11.3269	11.5864	11.0851	12.4253	12.112	11.9424
ENSMUSG00000050234	14612	Gja4	gap junction protein, alpha 4	protein_coding	1.87862	3.16755	0.00153727	0.0133153	370	173	173	273	593	816	819	8.81353	7.81989	8.09354	8.40963	9.31555	9.23572	9.00193
ENSMUSG00000047657		Crry-ps	complement receptor related protein, pseudogene	processed_pseudogene	1.72386	3.16724	0.00153892	0.0133259	69	61	42	78	139	180	201	6.68937	6.56632	6.39035	6.83469	7.39261	7.24714	7.1707
ENSMUSG00000038696	227743	Mapkap1	mitogen-activated protein kinase associated protein 1	protein_coding	1.38452	3.16715	0.00153942	0.0133264	796	781	567	749	1049	1830	2108	9.87511	9.86606	9.71203	9.79683	10.1134	10.3671	10.3219
ENSMUSG00000027111	16403	Itga6	integrin alpha 6	protein_coding	1.52791	3.16677	0.00154143	0.0133401	1846	1724	1258	1572	2464	5169	4485	11.0664	10.9868	10.8376	10.8447	11.3263	11.8471	11.3959
ENSMUSG00000078853	16145	Igtp	interferon gamma induced GTPase	protein_coding	8.12264	3.16647	0.00154303	0.0133502	498	242	292	328	8202	830	1686	9.22143	8.25902	8.79466	8.65672	13.0512	9.25925	10.0068
ENSMUSG00000037362	18133	Ccn3	cellular communication network factor 3	protein_coding	2.86587	3.16632	0.00154382	0.0133532	218	58	141	114	315	438	1283	8.10446	6.51117	7.82734	7.28594	8.45176	8.38852	9.62377
ENSMUSG00000026321	21934	Tnfrsf11a	tumor necrosis factor receptor superfamily, member 11a, NFKB activator	protein_coding	1.9229	3.16497	0.001551	0.0134039	98	73	75	107	270	205	329	7.09679	6.7674	7.04366	7.20873	8.24618	7.40705	7.78561
ENSMUSG00000028893	230784	Sesn2	sestrin 2	protein_coding	1.60153	3.16422	0.00155498	0.0134317	418	309	275	289	719	835	926	8.98031	8.58621	8.7131	8.48599	9.5835	9.26756	9.17093
ENSMUSG00000035473	319625	Galm	galactose mutarotase	protein_coding	1.76637	3.1641	0.00155566	0.0134317	64	96	59	100	168	210	317	6.60542	7.08718	6.76443	7.12707	7.63011	7.43699	7.73797
ENSMUSG00000111167		Gm39321	predicted gene, 39321	lincRNA	45.2871	3.16401	0.00155611	0.0134317	0	0	0	0	24	6	3	3.67762	3.67762	3.67762	3.67762	5.5503	4.49766	4.21343
ENSMUSG00000000805	12351	Car4	carbonic anhydrase 4	protein_coding	12.7182	3.16396	0.0015564	0.0134317	97	86	67	277	5222	360	570	7.08454	6.95694	6.91094	8.4291	12.4023	8.12831	8.50925
ENSMUSG00000029204	74734	Rhoh	ras homolog family member H	protein_coding	4.25141	3.16021	0.00157656	0.0135928	43	22	38	64	480	111	127	6.1838	5.57693	6.28542	6.61103	9.02383	6.68033	6.63704
ENSMUSG00000036402	14701	Gng12	guanine nucleotide binding protein (G protein), gamma 12	protein_coding	1.62211	3.16016	0.00157684	0.0135928	1997	1240	1199	1227	2830	3916	4479	11.1785	10.5185	10.7693	10.4929	11.5243	11.4498	11.394
ENSMUSG00000052102	26384	Gnpda1	glucosamine-6-phosphate deaminase 1	protein_coding	1.82986	3.16001	0.00157762	0.0135957	326	200	211	189	621	704	688	8.64159	8.00802	8.35647	7.92456	9.37955	9.03222	8.76377
ENSMUSG00000035181	320487	Heatr5a	HEAT repeat containing 5A	protein_coding	1.65883	3.15864	0.00158505	0.0136278	269	327	298	349	740	683	1081	8.38313	8.66277	8.82237	8.7409	9.62369	8.99065	9.38518
ENSMUSG00000050211	329502	Pla2g4e	phospholipase A2, group IVE	protein_coding	2.75206	3.1586	0.00158527	0.0136278	1193	272	346	408	1559	3249	2634	10.4459	8.41478	9.02677	8.95405	10.6742	11.1831	10.6376
ENSMUSG00000085152		Gm11496	predicted gene 11496	lincRNA	4.29934	3.15859	0.00158535	0.0136278	6	1	4	6	15	33	46	4.71362	4.11081	4.62649	4.71614	5.19354	5.50264	5.63435
ENSMUSG00000019923	52696	Zwint	ZW10 interactor	protein_coding	1.33982	3.15796	0.00158876	0.0136533	844	777	721	878	1326	1798	2180	9.95738	9.85886	10.0494	10.0201	10.4446	10.3422	10.3694
ENSMUSG00000022026	380924	Olfm4	olfactomedin 4	protein_coding	11.0271	3.15726	0.00159259	0.0136785	0	4	0	3	42	28	10	3.67762	4.5346	3.67762	4.41971	6.05448	5.37368	4.64337
ENSMUSG00000029265	13486	Dr1	down-regulator of transcription 1	protein_coding	1.80365	3.15709	0.00159352	0.0136787	308	423	345	280	830	761	1435	8.56487	9.01388	9.02279	8.44354	9.78427	9.13937	9.78041
ENSMUSG00000031256	108062	Cstf2	cleavage stimulation factor, 3' pre-RNA subunit 2	protein_coding	1.61955	3.15697	0.0015942	0.0136787	306	271	213	197	405	765	833	8.55609	8.40985	8.36907	7.97849	8.79146	9.1466	9.0252
ENSMUSG00000021248	68581	Tmed10	transmembrane p24 trafficking protein 10	protein_coding	1.46552	3.15611	0.00159888	0.0137095	2074	1516	1461	2055	3308	4177	5200	11.2325	10.8038	11.0507	11.2266	11.7476	11.5421	11.6074
ENSMUSG00000040345	216445	Arhgap9	Rho GTPase activating protein 9	protein_coding	2.33239	3.15602	0.00159936	0.0137098	384	194	223	281	1231	745	835	8.8642	7.96829	8.43042	8.44831	10.3394	9.11009	9.0285
ENSMUSG00000035949	30050	Fbxw2	F-box and WD-40 domain protein 2	protein_coding	1.35631	3.15559	0.00160173	0.0137262	994	1013	753	967	1443	2008	2825	10.1878	10.2323	10.1106	10.1561	10.5645	10.4986	10.737
ENSMUSG00000024776	76630	Stambpl1	STAM binding protein like 1	protein_coding	1.60866	3.15431	0.00160879	0.0137829	133	114	88	156	253	333	368	7.47029	7.29515	7.23587	7.6778	8.16016	8.02602	7.93032
ENSMUSG00000030199	14011	Etv6	ets variant 6	protein_coding	1.87127	3.15341	0.00161376	0.0138216	492	272	292	335	1005	1049	990	9.20468	8.41478	8.79466	8.68533	10.0531	9.58468	9.26329
ENSMUSG00000020057	71712	Dram1	DNA-damage regulated autophagy modulator 1	protein_coding	2.81135	3.15231	0.00161986	0.0138655	563	288	353	817	2903	1106	2264	9.3914	8.49143	9.05429	9.91879	11.5607	9.65858	10.423
ENSMUSG00000030737	101488	Slco2b1	solute carrier organic anion transporter family, member 2b1	protein_coding	1.82197	3.15216	0.0016207	0.0138655	384	402	323	602	1004	930	1898	8.8642	8.94405	8.93244	9.49157	10.0517	9.41701	10.1737
ENSMUSG00000050994	215772	Adgb	androglobin	protein_coding	22.4475	3.15197	0.00162174	0.0138677	0	2	0	0	26	13	9	3.67762	4.28798	3.67762	3.67762	5.61712	4.86703	4.59546
ENSMUSG00000027351	114715	Spred1	sprouty protein with EVH-1 domain 1, related sequence	protein_coding	1.72579	3.15154	0.00162414	0.0138784	437	473	461	546	1287	1038	1631	9.04133	9.16767	9.42337	9.35587	10.4023	9.56998	9.96013
ENSMUSG00000005371	225055	Fbxo11	F-box protein 11	protein_coding	1.63406	3.15146	0.00162456	0.0138784	428	546	490	515	1098	1073	1809	9.01275	9.3663	9.50826	9.27486	10.1778	9.61626	10.106
ENSMUSG00000030341	21937	Tnfrsf1a	tumor necrosis factor receptor superfamily, member 1a	protein_coding	1.73513	3.15143	0.00162472	0.0138784	4637	2560	2561	3523	8238	9085	9982	12.3848	11.5513	11.853	11.9978	13.0575	12.6564	12.5426
ENSMUSG00000022453	17939	Naga	N-acetyl galactosaminidase, alpha	protein_coding	1.56294	3.1514	0.00162492	0.0138784	919	788	597	742	1695	1630	2382	10.0772	9.87859	9.78423	9.78367	10.7931	10.2035	10.4949
ENSMUSG00000050174	229228	Nudt6	nudix (nucleoside diphosphate linked moiety X)-type motif 6	protein_coding	1.91178	3.15096	0.00162736	0.0138954	71	134	83	85	229	240	412	6.72159	7.49537	7.16499	6.93444	8.02924	7.60452	8.07778
ENSMUSG00000038175	218203	Mylip	myosin regulatory light chain interacting protein	protein_coding	1.89163	3.1508	0.00162824	0.0138956	426	698	385	346	1084	1159	2110	9.00632	9.7086	9.17383	8.72917	10.1597	9.72405	10.3233
ENSMUSG00000026833	56177	Olfm1	olfactomedin 1	protein_coding	1.52308	3.15078	0.00162835	0.0138956	597	485	492	609	1170	1241	1599	9.47292	9.20226	9.51393	9.50767	10.2675	9.81983	9.93228
ENSMUSG00000015653	74051	Steap2	six transmembrane epithelial antigen of prostate 2	protein_coding	2.37495	3.15071	0.00162874	0.0138956	80	127	65	136	460	282	337	6.85806	7.42845	6.87572	7.50451	8.96544	7.81031	7.81651
ENSMUSG00000103088	93703	Pcdhgb6	protocadherin gamma subfamily B, 6	protein_coding	3.91981	3.15053	0.00162977	0.0138997	10	6	7	5	32	20	89	4.9975	4.71989	4.91713	4.62892	5.79876	5.13259	6.2558
ENSMUSG00000038058	107607	Nod1	nucleotide-binding oligomerization domain containing 1	protein_coding	1.61488	3.14941	0.00163601	0.0139341	741	556	536	579	1423	1337	1916	9.77469	9.39149	9.63342	9.43737	10.5447	9.92443	10.187
ENSMUSG00000022283	18458	Pabpc1	poly(A) binding protein, cytoplasmic 1	protein_coding	1.50703	3.14753	0.00164659	0.0140088	5639	4348	5072	5460	10356	12897	14379	12.6658	12.3105	12.8339	12.6267	13.3868	13.1602	13.0673
ENSMUSG00000037580	14528	Gch1	GTP cyclohydrolase 1	protein_coding	2.36484	3.147	0.00164953	0.0140299	484	183	278	235	1235	913	1061	9.18204	7.89247	8.72783	8.21017	10.344	9.39138	9.35926
ENSMUSG00000019370	12315	Calm3	calmodulin 3	protein_coding	1.47522	3.14677	0.00165087	0.0140374	2635	2902	2252	2964	5506	5572	8088	11.5746	11.7308	11.6688	11.7503	12.4784	11.9547	12.2405
ENSMUSG00000024182	12005	Axin1	axin 1	protein_coding	1.43516	3.14628	0.00165359	0.0140528	848	733	520	681	1080	1766	2099	9.96403	9.77711	9.59111	9.6636	10.1545	10.3168	10.3159
ENSMUSG00000052760	319997	A630001G21Rik	RIKEN cDNA A630001G21 gene	protein_coding	2.85835	3.14565	0.00165718	0.0140793	41	20	29	50	203	120	119	6.13595	5.49882	6.01475	6.34446	7.87248	6.76852	6.56504
ENSMUSG00000040220	104346	Gas8	growth arrest specific 8	protein_coding	1.42388	3.14438	0.0016644	0.0141368	275	232	197	258	393	627	665	8.41263	8.20311	8.2651	8.33416	8.75053	8.87353	8.71756
ENSMUSG00000090946	72123	Ccdc71l	coiled-coil domain containing 71 like	protein_coding	1.96592	3.14365	0.00166855	0.0141682	673	448	363	464	1642	1392	1323	9.64001	9.09283	9.09272	9.13081	10.7479	9.9811	9.66667
ENSMUSG00000032965	73916	Ift57	intraflagellar transport 57	protein_coding	1.87328	3.14336	0.00167019	0.0141781	141	151	74	90	305	336	368	7.54348	7.64594	7.02773	7.0016	8.40855	8.03775	7.93032
ENSMUSG00000008976	14390	Gabpa	GA repeat binding protein, alpha	protein_coding	1.7646	3.14186	0.00167877	0.014243	216	354	290	259	612	694	1167	8.09234	8.77047	8.7853	8.33932	9.35928	9.01257	9.49162
ENSMUSG00000091243	73569	Vgll3	vestigial like family member 3	protein_coding	1.68693	3.14148	0.00168095	0.0142576	464	333	376	316	673	955	1570	9.12383	8.6874	9.1412	8.60631	9.49135	9.45389	9.90656
ENSMUSG00000066807		Gm10179	predicted gene 10179	processed_pseudogene	3.98413	3.14052	0.00168646	0.0143004	9	2	7	12	49	26	68	4.93383	4.28798	4.91713	5.11769	6.20817	5.31795	5.98827
ENSMUSG00000092072		Gm4540	predicted gene 4540	processed_pseudogene	1.59818	3.14009	0.00168898	0.0143059	255	373	260	271	604	691	975	8.31185	8.8417	8.6371	8.39979	9.34103	9.00663	9.24216
ENSMUSG00000021133	217684	Susd6	sushi domain containing 6	protein_coding	1.61962	3.13884	0.00169617	0.0143589	1190	887	952	1028	2443	2278	3158	10.4423	10.045	10.442	10.2425	11.3141	10.6776	10.8955
ENSMUSG00000030148	26888	Clec4a2	C-type lectin domain family 4, member a2	protein_coding	2.53764	3.13828	0.00169944	0.01438	223	139	242	177	1035	516	691	8.13429	7.54133	8.54025	7.83966	10.0945	8.60878	8.76968
ENSMUSG00000035382	18554	Pcsk7	proprotein convertase subtilisin/kexin type 7	protein_coding	1.61693	3.13799	0.00170111	0.0143815	439	315	252	384	697	771	1289	9.04761	8.61219	8.59486	8.87111	9.54016	9.15738	9.63029
ENSMUSG00000021000	338320	Mia2	MIA SH3 domain ER export factor 2	protein_coding	1.45471	3.13666	0.00170884	0.0144382	1307	953	831	1021	1677	2739	2961	10.5752	10.1461	10.2497	10.2328	10.7779	10.9397	10.8039
ENSMUSG00000051041	244198	Olfml1	olfactomedin-like 1	protein_coding	2.35068	3.13645	0.00171007	0.0144406	87	48	72	133	260	211	520	6.95575	6.30962	6.99534	7.47661	8.19621	7.4429	8.38617
ENSMUSG00000063975	108096	Slco1a5	solute carrier organic anion transporter family, member 1a5	protein_coding	4.20238	3.13623	0.00171133	0.0144433	12	7	15	1	51	73	58	5.11432	4.79955	5.43727	4.10919	6.24906	6.23035	5.83919
ENSMUSG00000015468	18132	Notch4	notch 4	protein_coding	2.061	3.13496	0.00171875	0.014494	369	209	182	318	931	850	742	8.80985	8.06562	8.1603	8.61484	9.94545	9.29221	8.86675
ENSMUSG00000023952	56055	Gtpbp2	GTP binding protein 2	protein_coding	1.41022	3.13472	0.00172016	0.0145019	1046	1032	658	904	1482	2138	2687	10.2598	10.2586	9.92076	10.0611	10.6023	10.5875	10.6659
ENSMUSG00000020901	320207	Pik3r5	phosphoinositide-3-kinase regulatory subunit 5	protein_coding	3.41402	3.13304	0.00173007	0.0145734	103	38	108	160	804	300	410	7.15654	6.07317	7.48862	7.71007	9.73969	7.8902	8.0714
ENSMUSG00000049281	235281	Scn3b	sodium channel, voltage-gated, type III, beta	protein_coding	2.73049	3.13243	0.00173367	0.0145917	19	19	31	14	99	70	103	5.44789	5.45783	6.07977	5.22344	6.98234	6.18767	6.40877
ENSMUSG00000040026	20210	Saa3	serum amyloid A 3	protein_coding	16.6471	3.13198	0.0017363	0.0146018	6913	161	2584	6089	190244	22891	38476	12.9586	7.72764	11.8658	12.7834	17.5828	13.9862	14.4846
ENSMUSG00000033436	67416	Armcx2	armadillo repeat containing, X-linked 2	protein_coding	1.67316	3.13105	0.00174183	0.0146442	129	112	131	129	298	301	422	7.43223	7.27349	7.73289	7.43853	8.37751	7.89451	8.10928
ENSMUSG00000037892	73173	Pcdh18	protocadherin 18	protein_coding	1.9061	3.13067	0.00174409	0.0146486	44	35	37	67	98	155	178	6.20711	5.99331	6.25788	6.66206	6.97039	7.06693	7.02535
ENSMUSG00000042211	107035	Fbxo38	F-box protein 38	protein_coding	1.50452	3.13064	0.00174426	0.0146486	596	528	388	409	904	1159	1467	9.47059	9.3198	9.18454	8.9574	9.9041	9.72405	9.81133
ENSMUSG00000045689	93875	Pcdhb4	protocadherin beta 4	protein_coding	5.35755	3.12928	0.00175236	0.0147065	4	11	1	1	20	46	47	4.52938	5.06559	4.15842	4.10919	5.40471	5.78616	5.65273
ENSMUSG00000034761	399510	Map4k5	mitogen-activated protein kinase kinase kinase kinase 5	protein_coding	1.76873	3.12915	0.00175311	0.0147065	602	392	414	385	754	1229	2097	9.48453	8.90957	9.27421	8.87467	9.64988	9.8062	10.3145
ENSMUSG00000090958	434215	Lrrc32	leucine rich repeat containing 32	protein_coding	2.46381	3.12908	0.00175355	0.0147065	702	166	325	497	1394	1406	2241	9.699	7.7668	8.94089	9.22564	10.5155	9.99518	10.4085
[truncated: 53,495 more rows]
