# Supplementary material for: Topical ABT-263 treatment reduces aged skin senescence and improves subsequent wound healing
Source: Aging (Albany NY). 2024 Dec 3;17(1):16–32. doi: 10.18632/aging.206165 (PMC11810067; doi:10.18632/aging.206165)
Supplement: Supplementary Table 2 [file aging-17-206165-s003.xlsx]

## Sheet: Compiled GSEA results
Supplementary Table 2. GSEA results.
			ABT-263 vs DMSO
Group	Gene Set Name	Gene Set Size	NES	p	FDR q
MH Hallmark	HALLMARK_INTERFERON_GAMMA_RESPONSE	187	2.88292	0	0
MH Hallmark	HALLMARK_INFLAMMATORY_RESPONSE	194	2.82163	0	0
MH Hallmark	HALLMARK_TNFA_SIGNALING_VIA_NFKB	195	2.77208	0	0
M5 GO Biological Process	GOBP_MYELOID_LEUKOCYTE_MIGRATION	231	2.74742	0	0
M5 GO Biological Process	GOBP_LEUKOCYTE_CHEMOTAXIS	223	2.7053	0	0
MH Hallmark	HALLMARK_INTERFERON_ALPHA_RESPONSE	93	2.70279	0	0
M5 GO Biological Process	GOBP_RESPONSE_TO_TYPE_II_INTERFERON	138	2.69647	0	0
M5 GO Biological Process	GOBP_GRANULOCYTE_MIGRATION	151	2.69633	0	0
MH Hallmark	HALLMARK_IL6_JAK_STAT3_SIGNALING	82	2.6915	0	0
M5 GO Biological Process	GOBP_REGULATION_OF_LEUKOCYTE_MIGRATION	233	2.67994	0	0
M5 GO Biological Process	GOBP_LEUKOCYTE_MIGRATION	373	2.66888	0	0
M5 GO Biological Process	GOBP_NEUTROPHIL_MIGRATION	123	2.66136	0	0
MH Hallmark	HALLMARK_ALLOGRAFT_REJECTION	188	2.63801	0	0
M5 GO Biological Process	GOBP_CELL_CHEMOTAXIS	307	2.61446	0	0
M2 WikiPathways pathway	WP_TYROBP_CAUSAL_NETWORK_IN_MICROGLIA	57	2.61179	0	0
M5 GO Biological Process	GOBP_CELLULAR_RESPONSE_TO_BIOTIC_STIMULUS	226	2.60621	0	0
M5 GO Biological Process	GOBP_PHAGOCYTOSIS	225	2.59994	0	0
M5 GO Biological Process	GOBP_GRANULOCYTE_CHEMOTAXIS	123	2.59634	0	0
M5 GO Biological Process	GOBP_POSITIVE_REGULATION_OF_LEUKOCYTE_MIGRATION	161	2.57824	0	0
M5 GO Biological Process	GOBP_RESPONSE_TO_MOLECULE_OF_BACTERIAL_ORIGIN	296	2.54216	0	0
M5 GO Biological Process	GOBP_NEUTROPHIL_CHEMOTAXIS	98	2.52344	0	0
M5 GO Biological Process	GOBP_REGULATION_OF_NEUTROPHIL_MIGRATION	51	2.51345	0	0
M5 GO Biological Process	GOBP_POSITIVE_REGULATION_OF_PHAGOCYTOSIS	82	2.51177	0	0
M5 GO Biological Process	GOBP_REGULATION_OF_PHAGOCYTOSIS	116	2.50763	0	0
M5 GO Biological Process	GOBP_CELLULAR_RESPONSE_TO_TYPE_II_INTERFERON	112	2.50614	0	0
M2 Reactome pathway	REACTOME_IMMUNOREGULATORY_INTERACTIONS_BETWEEN_A_LYMPHOID_AND_A_NON_LYMPHOID_CELL	95	2.49808	0	0
M5 GO Biological Process	GOBP_REGULATION_OF_IMMUNE_EFFECTOR_PROCESS	414	2.49484	0	0
MH Hallmark	HALLMARK_COMPLEMENT	185	2.4942	0	0
M5 GO Cellular Component	GOCC_EXTERNAL_SIDE_OF_PLASMA_MEMBRANE	463	2.49386	0	0
M5 GO Biological Process	GOBP_CELLULAR_EXTRAVASATION	76	2.49261	0	0
M5 GO Biological Process	GOBP_MONONUCLEAR_CELL_MIGRATION	181	2.49227	0	0
M5 GO Biological Process	GOBP_ADAPTIVE_IMMUNE_RESPONSE	446	2.48906	0	0
M5 GO Biological Process	GOBP_ACUTE_PHASE_RESPONSE	39	2.48894	0	0
M5 GO Biological Process	GOBP_INTEGRIN_MEDIATED_SIGNALING_PATHWAY	99	2.48266	0	0
M5 GO Biological Process	GOBP_RESPONSE_TO_INTERFERON_BETA	67	2.48125	0	0
M2 Reactome pathway	REACTOME_CELL_SURFACE_INTERACTIONS_AT_THE_VASCULAR_WALL	95	2.47949	0	0
MH Hallmark	HALLMARK_COAGULATION	131	2.47475	0	0
M5 GO Biological Process	GOBP_POSITIVE_REGULATION_OF_RESPONSE_TO_BIOTIC_STIMULUS	380	2.47422	0	0
M5 GO Biological Process	GOBP_CYTOKINE_PRODUCTION_INVOLVED_IN_IMMUNE_RESPONSE	161	2.47042	0	0
M5 GO Biological Process	GOBP_POSITIVE_REGULATION_OF_DEFENSE_RESPONSE	478	2.46471	0	0
M5 GO Biological Process	GOBP_ADAPTIVE_IMMUNE_RESPONSE_BASED_ON_SOMATIC_RECOMBINATION_OF_IMMUNE_RECEPTORS_BUILT_FROM_IMMUNOGLOBULIN_SUPERFAMILY_DOMAINS	329	2.46294	0	0
M5 GO Biological Process	GOBP_POSITIVE_REGULATION_OF_TUMOR_NECROSIS_FACTOR_SUPERFAMILY_CYTOKINE_PRODUCTION	130	2.45981	0	0
M5 GO Biological Process	GOBP_POSITIVE_REGULATION_OF_INFLAMMATORY_RESPONSE	146	2.45536	0	0
M5 GO Biological Process	GOBP_POSITIVE_REGULATION_OF_IMMUNE_EFFECTOR_PROCESS	286	2.45151	0	0
M5 GO Biological Process	GOBP_REGULATION_OF_LEUKOCYTE_CHEMOTAXIS	124	2.4487	0	0
M5 GO Biological Process	GOBP_PRODUCTION_OF_MOLECULAR_MEDIATOR_INVOLVED_IN_INFLAMMATORY_RESPONSE	101	2.44739	0	0
M5 GO Biological Process	GOBP_MYELOID_LEUKOCYTE_ACTIVATION	258	2.44025	0	0
M5 GO Molecular Function	GOMF_PATTERN_RECOGNITION_RECEPTOR_ACTIVITY	38	2.43407	0	0
M5 GO Biological Process	GOBP_REGULATION_OF_ADAPTIVE_IMMUNE_RESPONSE	217	2.43112	0	0
M2 Reactome pathway	REACTOME_NEUTROPHIL_DEGRANULATION	496	2.42895	0	0
M5 GO Biological Process	GOBP_DETECTION_OF_BIOTIC_STIMULUS	39	2.42645	0	0
M5 GO Biological Process	GOBP_CYTOKINE_MEDIATED_SIGNALING_PATHWAY	413	2.42643	0	0
M5 GO Biological Process	GOBP_REGULATION_OF_LEUKOCYTE_MEDIATED_IMMUNITY	267	2.42612	0	0
M5 GO Biological Process	GOBP_RESPONSE_TO_CHEMOKINE	73	2.41583	0	0
M5 GO Biological Process	GOBP_ACTIVATION_OF_INNATE_IMMUNE_RESPONSE	270	2.41539	0	0
M5 GO Biological Process	GOBP_ANTIGEN_PROCESSING_AND_PRESENTATION	108	2.4087	0	0
M5 GO Biological Process	GOBP_REGULATION_OF_GRANULOCYTE_CHEMOTAXIS	57	2.40864	0	0
M2 WikiPathways pathway	WP_MICROGLIA_PATHOGEN_PHAGOCYTOSIS_PATHWAY	41	2.40238	0	0
M5 GO Biological Process	GOBP_DEFENSE_RESPONSE_TO_BACTERIUM	298	2.40104	0	0
M5 GO Biological Process	GOBP_DEFENSE_RESPONSE_TO_GRAM_POSITIVE_BACTERIUM	124	2.40009	0	0
M5 GO Biological Process	GOBP_TUMOR_NECROSIS_FACTOR_SUPERFAMILY_CYTOKINE_PRODUCTION	209	2.39792	0	0
M5 GO Biological Process	GOBP_LYMPHOCYTE_MEDIATED_IMMUNITY	317	2.39754	0	0
M5 GO Biological Process	GOBP_TAXIS	433	2.39751	0	0
M2 Reactome pathway	REACTOME_INTEGRIN_CELL_SURFACE_INTERACTIONS	73	2.39391	0	0
M5 GO Biological Process	GOBP_POSITIVE_REGULATION_OF_NEUTROPHIL_MIGRATION	40	2.39374	0	0
M5 GO Biological Process	GOBP_CYTOKINE_PRODUCTION_INVOLVED_IN_INFLAMMATORY_RESPONSE	68	2.39148	0	0
M5 GO Biological Process	GOBP_LEUKOCYTE_MEDIATED_IMMUNITY	428	2.38923	0	0
M5 GO Biological Process	GOBP_REGULATION_OF_INNATE_IMMUNE_RESPONSE	428	2.38853	0	0
M2 WikiPathways pathway	WP_TYPE_II_INTERFERON_SIGNALING_IFNG	31	2.37729	0	0
M5 GO Biological Process	GOBP_TYPE_II_INTERFERON_PRODUCTION	136	2.3761	0	0
M5 GO Biological Process	GOBP_CELL_KILLING	226	2.36925	0	0
M5 GO Biological Process	GOBP_REGULATION_OF_CELLULAR_EXTRAVASATION	43	2.36917	0	0
M5 GO Biological Process	GOBP_T_CELL_MIGRATION	65	2.36872	0	0
M5 GO Biological Process	GOBP_RESPONSE_TO_VIRUS	357	2.36271	0	0
MH Hallmark	HALLMARK_EPITHELIAL_MESENCHYMAL_TRANSITION	193	2.36144	0	0
M5 GO Biological Process	GOBP_ANTIGEN_PROCESSING_AND_PRESENTATION_OF_PEPTIDE_OR_POLYSACCHARIDE_ANTIGEN_VIA_MHC_CLASS_II	25	2.35718	0	0
M5 GO Molecular Function	GOMF_COLLAGEN_BINDING	70	2.35499	0	0
M5 GO Biological Process	GOBP_GLIAL_CELL_ACTIVATION	57	2.35254	0	0
M5 GO Biological Process	GOBP_T_CELL_MEDIATED_IMMUNITY	140	2.35087	0	0
M5 GO Biological Process	GOBP_NEUTROPHIL_ACTIVATION_INVOLVED_IN_IMMUNE_RESPONSE	20	2.34932	0	0
M2 Reactome pathway	REACTOME_EXTRACELLULAR_MATRIX_ORGANIZATION	239	2.34806	0	0
M5 GO Biological Process	GOBP_ACTIVATION_OF_IMMUNE_RESPONSE	499	2.34748	0	0
M5 GO Biological Process	GOBP_KILLING_OF_CELLS_OF_ANOTHER_ORGANISM	85	2.34552	0	0
M5 GO Biological Process	GOBP_REGULATION_OF_INFLAMMATORY_RESPONSE	362	2.34239	0	0
M5 GO Biological Process	GOBP_INNATE_IMMUNE_RESPONSE_ACTIVATING_SIGNALING_PATHWAY	235	2.34152	0	0
M5 GO Biological Process	GOBP_POSITIVE_REGULATION_OF_LEUKOCYTE_CHEMOTAXIS	98	2.34101	0	0
M5 GO Biological Process	GOBP_REGULATION_OF_MONONUCLEAR_CELL_MIGRATION	122	2.34094	0	0
M5 GO Biological Process	GOBP_LYMPHOCYTE_CHEMOTAXIS	50	2.3396	0	0
M5 GO Biological Process	GOBP_DEFENSE_RESPONSE_TO_SYMBIONT	304	2.33623	0	0
MH Hallmark	HALLMARK_KRAS_SIGNALING_UP	198	2.32851	0	0
M5 GO Biological Process	GOBP_DETECTION_OF_EXTERNAL_BIOTIC_STIMULUS	28	2.32535	0	0
M5 GO Biological Process	GOBP_RESPONSE_TO_FUNGUS	67	2.32372	0	0
M2 Reactome pathway	REACTOME_ASSEMBLY_OF_COLLAGEN_FIBRILS_AND_OTHER_MULTIMERIC_STRUCTURES	47	2.31981	0	0
M5 GO Biological Process	GOBP_POSITIVE_REGULATION_OF_ADAPTIVE_IMMUNE_RESPONSE	144	2.31685	0	0
M5 GO Biological Process	GOBP_POSITIVE_REGULATION_OF_CHEMOTAXIS	151	2.31475	0	0
M5 GO Biological Process	GOBP_POSITIVE_REGULATION_OF_ENDOCYTOSIS	190	2.30929	0	0
M5 GO Biological Process	GOBP_DISRUPTION_OF_ANATOMICAL_STRUCTURE_IN_ANOTHER_ORGANISM	89	2.30913	0	0
M5 GO Biological Process	GOBP_ACUTE_INFLAMMATORY_RESPONSE	114	2.30787	0	0
M5 GO Biological Process	GOBP_REGULATION_OF_PRODUCTION_OF_MOLECULAR_MEDIATOR_OF_IMMUNE_RESPONSE	213	2.30395	0	0
M5 GO Biological Process	GOBP_LEUKOCYTE_ACTIVATION_INVOLVED_IN_INFLAMMATORY_RESPONSE	52	2.30383	0	0
M5 GO Biological Process	GOBP_RESPONSE_TO_INTERLEUKIN_1	93	2.30091	0	0
M5 GO Molecular Function	GOMF_IMMUNE_RECEPTOR_ACTIVITY	131	2.29992	0	0
M5 GO Molecular Function	GOMF_INTEGRIN_BINDING	150	2.29775	0	0
M5 GO Cellular Component	GOCC_PHAGOCYTIC_VESICLE	109	2.29316	0	0
M5 GO Biological Process	GOBP_REGULATION_OF_NEUTROPHIL_CHEMOTAXIS	35	2.29092	0	0
M5 GO Biological Process	GOBP_POSITIVE_REGULATION_OF_RESPONSE_TO_CYTOKINE_STIMULUS	65	2.29067	0	0
M5 GO Biological Process	GOBP_ANTIGEN_PROCESSING_AND_PRESENTATION_OF_PEPTIDE_ANTIGEN	63	2.28412	0	0
M5 GO Biological Process	GOBP_NEGATIVE_REGULATION_OF_LEUKOCYTE_MEDIATED_IMMUNITY	81	2.28222	0	0
M5 GO Biological Process	GOBP_CYTOSOLIC_PATTERN_RECOGNITION_RECEPTOR_SIGNALING_PATHWAY	144	2.27974	0	0
M5 GO Biological Process	GOBP_REGULATION_OF_T_CELL_MEDIATED_IMMUNITY	99	2.27874	0	0
M5 GO Biological Process	GOBP_POSITIVE_REGULATION_OF_CHEMOKINE_PRODUCTION	84	2.27872	0	0
M5 GO Biological Process	GOBP_MACROPHAGE_ACTIVATION	103	2.27769	0	0
M5 GO Biological Process	GOBP_PYROPTOSIS	45	2.27688	0	0
M5 GO Biological Process	GOBP_NEUTROPHIL_ACTIVATION	39	2.27527	0	0
M5 GO Molecular Function	GOMF_CHEMOKINE_ACTIVITY	35	2.27408	0	0
M5 GO Biological Process	GOBP_REGULATION_OF_PEPTIDYL_TYROSINE_PHOSPHORYLATION	255	2.27395	0	0
M5 GO Biological Process	GOBP_LEUKOCYTE_MEDIATED_CYTOTOXICITY	149	2.27305	0	0
M5 GO Biological Process	GOBP_DEFENSE_RESPONSE_TO_GRAM_NEGATIVE_BACTERIUM	72	2.27299	0	0
M5 GO Biological Process	GOBP_INTERLEUKIN_6_PRODUCTION	179	2.27201	0	0
M5 GO Biological Process	GOBP_POSITIVE_REGULATION_OF_CD4_POSITIVE_ALPHA_BETA_T_CELL_ACTIVATION	41	2.27102	0	0
M5 GO Biological Process	GOBP_REGULATION_OF_CELL_KILLING	127	2.27074	0	0
M5 GO Molecular Function	GOMF_EXTRACELLULAR_MATRIX_STRUCTURAL_CONSTITUENT	141	2.26877	0	0
M5 GO Biological Process	GOBP_NEGATIVE_REGULATION_OF_IMMUNE_EFFECTOR_PROCESS	143	2.26842	0	0
M5 GO Biological Process	GOBP_POSITIVE_REGULATION_OF_INTERLEUKIN_1_PRODUCTION	66	2.26561	0	0
M5 GO Biological Process	GOBP_POSITIVE_REGULATION_OF_VASCULATURE_DEVELOPMENT	175	2.26256	0	0
M5 GO Biological Process	GOBP_REGULATION_OF_MYELOID_LEUKOCYTE_MEDIATED_IMMUNITY	81	2.26181	0	0
M5 GO Biological Process	GOBP_POSITIVE_REGULATION_OF_CD4_POSITIVE_ALPHA_BETA_T_CELL_DIFFERENTIATION	30	2.25914	0	0
M5 GO Biological Process	GOBP_CELLULAR_RESPONSE_TO_INTERLEUKIN_1	78	2.2588	0	0
M5 GO Biological Process	GOBP_GRANULOCYTE_ACTIVATION	47	2.25805	0	0
M5 GO Biological Process	GOBP_IMMUNE_RESPONSE_REGULATING_SIGNALING_PATHWAY	428	2.25697	0	0
M5 GO Biological Process	GOBP_REGULATION_OF_LYMPHOCYTE_MEDIATED_IMMUNITY	198	2.25439	0	0
M5 GO Biological Process	GOBP_ANTIGEN_PROCESSING_AND_PRESENTATION_OF_EXOGENOUS_PEPTIDE_ANTIGEN_VIA_MHC_CLASS_II	19	2.25324	0	0
M5 GO Biological Process	GOBP_POSITIVE_REGULATION_OF_TYPE_II_INTERFERON_PRODUCTION	82	2.25301	0	0
M5 GO Biological Process	GOBP_LYMPHOCYTE_MIGRATION	106	2.2517	0	0
M5 GO Biological Process	GOBP_RESPONSE_TO_PROTOZOAN	45	2.25159	0	0
M5 GO Biological Process	GOBP_POSITIVE_REGULATION_OF_CYTOKINE_PRODUCTION_INVOLVED_IN_IMMUNE_RESPONSE	98	2.25069	0	0
M5 GO Biological Process	GOBP_NUCLEOTIDE_BINDING_DOMAIN_LEUCINE_RICH_REPEAT_CONTAINING_RECEPTOR_SIGNALING_PATHWAY	22	2.25018	0	0
M5 GO Biological Process	GOBP_REGULATION_OF_MACROPHAGE_MIGRATION	47	2.24827	0	0
M5 GO Biological Process	GOBP_NEUROINFLAMMATORY_RESPONSE	82	2.2461	0	0
M5 GO Biological Process	GOBP_POSITIVE_REGULATION_OF_LEUKOCYTE_MEDIATED_IMMUNITY	163	2.24596	0	0
M5 GO Biological Process	GOBP_PHAGOCYTOSIS_ENGULFMENT	58	2.24215	0	0
M5 GO Biological Process	GOBP_HEMOSTASIS	179	2.24121	0	0
M5 GO Biological Process	GOBP_CELL_ADHESION_MEDIATED_BY_INTEGRIN	87	2.24115	0	0
M5 GO Biological Process	GOBP_POSITIVE_REGULATION_OF_MACROPHAGE_ACTIVATION	29	2.24094	0	0
M5 GO Biological Process	GOBP_REGULATION_OF_LYMPHOCYTE_MIGRATION	65	2.23966	0	0
M5 GO Biological Process	GOBP_REGULATION_OF_VASCULATURE_DEVELOPMENT	302	2.23801	0	0
M5 GO Biological Process	GOBP_MACROPHAGE_MIGRATION	65	2.23735	0	0
M2 Reactome pathway	REACTOME_COLLAGEN_FORMATION	77	2.23669	0	0
M5 GO Molecular Function	GOMF_PEPTIDASE_ACTIVATOR_ACTIVITY	53	2.2356	0	0
M5 GO Biological Process	GOBP_REGULATION_OF_T_CELL_MIGRATION	50	2.2355	0	0
M5 GO Cellular Component	GOCC_PHAGOCYTIC_VESICLE_MEMBRANE	23	2.23388	0	0
M5 GO Biological Process	GOBP_MYELOID_LEUKOCYTE_CYTOKINE_PRODUCTION	66	2.22988	0	0
M5 GO Biological Process	GOBP_POSITIVE_REGULATION_OF_INTERLEUKIN_1_BETA_PRODUCTION	56	2.22639	0	0
M5 GO Biological Process	GOBP_PEPTIDYL_TYROSINE_MODIFICATION	312	2.22465	0	0
M5 GO Biological Process	GOBP_REGULATION_OF_CHEMOTAXIS	228	2.22336	0	0
M5 GO Biological Process	GOBP_POSITIVE_REGULATION_OF_NITRIC_OXIDE_METABOLIC_PROCESS	51	2.22003	0	0
M5 GO Biological Process	GOBP_REGULATION_OF_LEUKOCYTE_PROLIFERATION	292	2.21901	0	0
M5 GO Biological Process	GOBP_PRODUCTION_OF_MOLECULAR_MEDIATOR_OF_IMMUNE_RESPONSE	287	2.21855	0	0
M5 GO Biological Process	GOBP_MONOCYTE_CHEMOTAXIS	56	2.21774	0	0
M5 GO Biological Process	GOBP_POSITIVE_REGULATION_OF_ALPHA_BETA_T_CELL_ACTIVATION	87	2.21644	0	0
M2 WikiPathways pathway	WP_CHEMOKINE_SIGNALING_PATHWAY	169	2.21394	0	6.62132e-06
M5 GO Molecular Function	GOMF_CYTOKINE_RECEPTOR_BINDING	253	2.21238	0	6.58045e-06
M5 GO Biological Process	GOBP_POSITIVE_REGULATION_OF_CELL_KILLING	88	2.21126	0	6.54008e-06
M5 GO Biological Process	GOBP_ENDOTHELIAL_CELL_PROLIFERATION	170	2.20922	0	6.5002e-06
M2 WikiPathways pathway	WP_KIT_RECEPTOR_SIGNALING_PATHWAY	67	2.2086	0	6.46081e-06
M5 GO Biological Process	GOBP_LEUKOCYTE_ADHESION_TO_VASCULAR_ENDOTHELIAL_CELL	51	2.20737	0	6.42189e-06
M5 GO Biological Process	GOBP_NEGATIVE_REGULATION_OF_IMMUNE_RESPONSE	207	2.20704	0	1.28467e-05
M5 GO Biological Process	GOBP_SUBSTRATE_ADHESION_DEPENDENT_CELL_SPREADING	102	2.20483	0	1.27702e-05
M5 GO Biological Process	GOBP_CHEMOKINE_PRODUCTION	123	2.20479	0	1.26947e-05
M5 GO Biological Process	GOBP_ANTIFUNGAL_INNATE_IMMUNE_RESPONSE	21	2.20468	0	1.262e-05
M5 GO Biological Process	GOBP_INTERLEUKIN_8_PRODUCTION	74	2.20424	0	1.25462e-05
M5 GO Biological Process	GOBP_NEGATIVE_REGULATION_OF_CYTOKINE_PRODUCTION	301	2.20243	0	1.24732e-05
M5 GO Biological Process	GOBP_DEFENSE_RESPONSE_TO_FUNGUS	56	2.20113	0	1.24011e-05
M2 Reactome pathway	REACTOME_CHEMOKINE_RECEPTORS_BIND_CHEMOKINES	46	2.19979	0	1.23299e-05
M5 GO Biological Process	GOBP_INTERLEUKIN_2_PRODUCTION	76	2.1992	0	1.22594e-05
M2 Reactome pathway	REACTOME_FCGAMMA_RECEPTOR_FCGR_DEPENDENT_PHAGOCYTOSIS	78	2.19612	0	1.84352e-05
M5 GO Biological Process	GOBP_NEGATIVE_REGULATION_OF_INTERLEUKIN_6_PRODUCTION	51	2.19608	0	1.8331e-05
M5 GO Biological Process	GOBP_LEUKOCYTE_PROLIFERATION	384	2.19568	0	1.8228e-05
M2 Reactome pathway	REACTOME_COLLAGEN_DEGRADATION	50	2.19363	0	1.81262e-05
M5 GO Biological Process	GOBP_TOLL_LIKE_RECEPTOR_SIGNALING_PATHWAY	66	2.18687	0	2.40905e-05
M5 GO Biological Process	GOBP_MACROPHAGE_CYTOKINE_PRODUCTION	50	2.18612	0	2.39574e-05
M5 GO Cellular Component	GOCC_PODOSOME	29	2.18601	0	2.38258e-05
M5 GO Cellular Component	GOCC_ENDOCYTIC_VESICLE	210	2.18289	0	2.36956e-05
M5 GO Biological Process	GOBP_T_CELL_PROLIFERATION	253	2.178	0	2.93646e-05
M5 GO Biological Process	GOBP_POSITIVE_REGULATION_OF_T_HELPER_CELL_DIFFERENTIATION	19	2.17717	0	2.92059e-05
M5 GO Biological Process	GOBP_NEGATIVE_REGULATION_OF_T_CELL_MEDIATED_IMMUNITY	22	2.17662	0	2.90489e-05
M2 WikiPathways pathway	WP_LUNG_FIBROSIS	58	2.17277	0	3.47145e-05
M5 GO Biological Process	GOBP_B_CELL_MEDIATED_IMMUNITY	155	2.17267	0	3.45299e-05
M5 GO Biological Process	GOBP_COLLAGEN_CATABOLIC_PROCESS	38	2.17148	0	3.43472e-05
M5 GO Biological Process	GOBP_ALPHA_BETA_T_CELL_PROLIFERATION	67	2.17111	0	3.41664e-05
M5 GO Biological Process	GOBP_NUCLEOTIDE_BINDING_OLIGOMERIZATION_DOMAIN_CONTAINING_2_SIGNALING_PATHWAY	18	2.17041	0	3.39875e-05
M5 GO Biological Process	GOBP_POSITIVE_REGULATION_OF_PEPTIDYL_TYROSINE_PHOSPHORYLATION	180	2.17011	0	3.38105e-05
M2 Reactome pathway	REACTOME_G_ALPHA_I_SIGNALLING_EVENTS	245	2.16649	0	4.4859e-05
M5 GO Biological Process	GOBP_REGULATION_OF_LEUKOCYTE_DEGRANULATION	52	2.16287	0	5.57325e-05
M5 GO Biological Process	GOBP_POSITIVE_REGULATION_OF_CYTOKINE_PRODUCTION_INVOLVED_IN_INFLAMMATORY_RESPONSE	29	2.16161	0	6.65065e-05
M5 GO Cellular Component	GOCC_COLLAGEN_CONTAINING_EXTRACELLULAR_MATRIX	376	2.15991	0	7.17371e-05
M5 GO Biological Process	GOBP_REGULATION_OF_T_CELL_PROLIFERATION	209	2.15868	0	7.70288e-05
M5 GO Biological Process	GOBP_REGULATION_OF_SUBSTRATE_ADHESION_DEPENDENT_CELL_SPREADING	59	2.15802	0	7.66398e-05
M5 GO Biological Process	GOBP_POSITIVE_REGULATION_OF_ACUTE_INFLAMMATORY_RESPONSE	42	2.15788	0	7.62547e-05
M5 GO Biological Process	GOBP_LIPOPOLYSACCHARIDE_MEDIATED_SIGNALING_PATHWAY	55	2.15738	0	7.58734e-05
M2 WikiPathways pathway	WP_MATRIX_METALLOPROTEINASES	27	2.15676	0	7.54959e-05
M5 GO Molecular Function	GOMF_PENTOSYLTRANSFERASE_ACTIVITY	51	2.15197	0	8.57553e-05
M5 GO Biological Process	GOBP_MEMBRANE_INVAGINATION	75	2.15123	0	8.53328e-05
M5 GO Biological Process	GOBP_REGULATION_OF_NITRIC_OXIDE_METABOLIC_PROCESS	75	2.15102	0	8.49145e-05
M5 GO Biological Process	GOBP_REGULATION_OF_MAST_CELL_ACTIVATION	55	2.15034	0	8.45003e-05
M5 GO Biological Process	GOBP_HUMORAL_IMMUNE_RESPONSE_MEDIATED_BY_CIRCULATING_IMMUNOGLOBULIN	44	2.14888	0	8.40901e-05
M5 GO Molecular Function	GOMF_GROWTH_FACTOR_RECEPTOR_BINDING	150	2.14709	0	9.42498e-05
M5 GO Biological Process	GOBP_CELL_ACTIVATION_INVOLVED_IN_IMMUNE_RESPONSE	298	2.14684	0	9.37967e-05
M5 GO Biological Process	GOBP_HUMORAL_IMMUNE_RESPONSE	206	2.14526	0	9.33479e-05
M5 GO Biological Process	GOBP_NEGATIVE_REGULATION_OF_B_CELL_PROLIFERATION	20	2.14302	0	9.29034e-05
M5 GO Biological Process	GOBP_PLATELET_ACTIVATION	97	2.14292	0	9.24631e-05
M5 GO Biological Process	GOBP_REGULATION_OF_SUPEROXIDE_METABOLIC_PROCESS	35	2.14182	0	9.20269e-05
M5 GO Biological Process	GOBP_POSITIVE_REGULATION_OF_PRODUCTION_OF_MOLECULAR_MEDIATOR_OF_IMMUNE_RESPONSE	153	2.13714	0	0.000117053
M5 GO Biological Process	GOBP_POSITIVE_REGULATION_OF_CELL_ACTIVATION	416	2.1331	0	0.000121549
MH Hallmark	HALLMARK_IL2_STAT5_SIGNALING	199	2.13252	0	0.000120984
M5 GO Biological Process	GOBP_RESPONSE_TO_INTERLEUKIN_17	25	2.13197	0	0.000120423
M5 GO Biological Process	GOBP_NEGATIVE_REGULATION_OF_ADAPTIVE_IMMUNE_RESPONSE	55	2.13146	0	0.000119869
M2 WikiPathways pathway	WP_INFLAMMATORY_RESPONSE_PATHWAY	30	2.13141	0	0.000119319
M5 GO Molecular Function	GOMF_PHOSPHATIDYLINOSITOL_PHOSPHATE_BINDING	194	2.13052	0	0.000118774
M5 GO Biological Process	GOBP_POSITIVE_REGULATION_OF_MYELOID_LEUKOCYTE_CYTOKINE_PRODUCTION_INVOLVED_IN_IMMUNE_RESPONSE	41	2.12787	0	0.000118234
M5 GO Biological Process	GOBP_POSITIVE_REGULATION_OF_LYMPHOCYTE_MIGRATION	42	2.12677	0	0.000132487
M5 GO Biological Process	GOBP_INTERLEUKIN_1_PRODUCTION	115	2.12527	0	0.000141725
M5 GO Biological Process	GOBP_RESPONSE_TO_TUMOR_NECROSIS_FACTOR	180	2.12435	0	0.00014109
M5 GO Biological Process	GOBP_MEMBRANE_PROTEIN_ECTODOMAIN_PROTEOLYSIS	44	2.1236	0	0.00014046
M5 GO Biological Process	GOBP_WOUND_HEALING	366	2.12277	0	0.000139836
M5 GO Biological Process	GOBP_POSITIVE_REGULATION_OF_LEUKOCYTE_ADHESION_TO_VASCULAR_ENDOTHELIAL_CELL	27	2.12228	0	0.000143983
M5 GO Biological Process	GOBP_NEGATIVE_REGULATION_OF_CELL_ACTIVATION	219	2.12152	0	0.00014809
M5 GO Biological Process	GOBP_REGULATION_OF_ENDOCYTOSIS	329	2.12106	0	0.00014744
M5 GO Biological Process	GOBP_REGULATION_OF_NATURAL_KILLER_CELL_ACTIVATION	63	2.1201	0	0.000146796
M2 Reactome pathway	REACTOME_COMPLEMENT_CASCADE	47	2.11966	0	0.000146158
M5 GO Biological Process	GOBP_MACROPHAGE_CHEMOTAXIS	45	2.11924	0	0.000145525
M5 GO Cellular Component	GOCC_EXTERNAL_ENCAPSULATING_STRUCTURE	494	2.11837	0	0.000154285
M5 GO Biological Process	GOBP_VASCULAR_ENDOTHELIAL_GROWTH_FACTOR_RECEPTOR_SIGNALING_PATHWAY	51	2.11556	0	0.000153623
M5 GO Biological Process	GOBP_ANTIGEN_PROCESSING_AND_PRESENTATION_OF_EXOGENOUS_ANTIGEN	46	2.1149	0	0.000152967
M5 GO Biological Process	GOBP_POSITIVE_REGULATION_OF_SUBSTRATE_ADHESION_DEPENDENT_CELL_SPREADING	41	2.11454	0	0.000152316
M5 GO Biological Process	GOBP_PLATELET_AGGREGATION	58	2.11432	0	0.00015167
M5 GO Molecular Function	GOMF_GLYCOSYLTRANSFERASE_ACTIVITY	251	2.11344	0	0.000155579
M5 GO Biological Process	GOBP_POSITIVE_REGULATION_OF_MYELOID_LEUKOCYTE_MEDIATED_IMMUNITY	39	2.11326	0	0.000154925
M5 GO Biological Process	GOBP_REGULATION_OF_T_CELL_CYTOKINE_PRODUCTION	36	2.11296	0	0.000154277
M5 GO Biological Process	GOBP_REGULATION_OF_PROTEIN_AUTOPHOSPHORYLATION	44	2.11042	0	0.000167103
M2 Reactome pathway	REACTOME_TOLL_LIKE_RECEPTOR_CASCADES	143	2.10723	0	0.000175396
M5 GO Biological Process	GOBP_MYELOID_LEUKOCYTE_DIFFERENTIATION	255	2.10693	0	0.000179115
M5 GO Biological Process	GOBP_POSITIVE_REGULATION_OF_INTERLEUKIN_8_PRODUCTION	58	2.10677	0	0.000178378
M5 GO Biological Process	GOBP_INTERLEUKIN_1_BETA_PRODUCTION	97	2.1064	0	0.000177647
M5 GO Biological Process	GOBP_REGULATION_OF_ANTIGEN_PROCESSING_AND_PRESENTATION	20	2.10543	0	0.000181372
M5 GO Biological Process	GOBP_T_HELPER_1_TYPE_IMMUNE_RESPONSE	52	2.10537	0	0.000180635
M5 GO Biological Process	GOBP_LEUKOCYTE_TETHERING_OR_ROLLING	35	2.10437	0	0.000184275
M5 GO Biological Process	GOBP_REGULATION_OF_T_HELPER_1_TYPE_IMMUNE_RESPONSE	32	2.09922	0	0.000196553
M5 GO Biological Process	GOBP_NEUTROPHIL_MEDIATED_IMMUNITY	39	2.09684	0	0.000208794
M5 GO Biological Process	GOBP_REGULATION_OF_LEUKOCYTE_ADHESION_TO_VASCULAR_ENDOTHELIAL_CELL	33	2.0967	0	0.000207958
M2 Reactome pathway	REACTOME_DEGRADATION_OF_THE_EXTRACELLULAR_MATRIX	102	2.09612	0	0.00020713
M2 Reactome pathway	REACTOME_DAP12_INTERACTIONS	57	2.09488	0	0.000206308
M5 GO Molecular Function	GOMF_NADPLUS_PROTEIN_ADP_RIBOSYLTRANSFERASE_ACTIVITY	24	2.09481	0	0.000205493
M5 GO Biological Process	GOBP_INTERLEUKIN_10_PRODUCTION	66	2.09213	0	0.00021748
M5 GO Biological Process	GOBP_POSITIVE_REGULATION_OF_INTERLEUKIN_6_PRODUCTION	112	2.0916	0	0.000216627
M5 GO Biological Process	GOBP_MAST_CELL_ACTIVATION	87	2.09145	0	0.000215781
M5 GO Biological Process	GOBP_ENDOLYSOSOMAL_TOLL_LIKE_RECEPTOR_SIGNALING_PATHWAY	50	2.09047	0	0.000219131
M5 GO Biological Process	GOBP_T_CELL_MEDIATED_CYTOTOXICITY	62	2.09041	0	0.000218282
M5 GO Biological Process	GOBP_MEMBRANE_PROTEIN_PROTEOLYSIS	57	2.08925	0	0.000217439
M5 GO Biological Process	GOBP_DETECTION_OF_OTHER_ORGANISM	19	2.08795	0	0.000216603
M2 WikiPathways pathway	WP_IL_5_SIGNALING_PATHWAY	68	2.08543	0	0.000224074
M5 GO Biological Process	GOBP_POSITIVE_REGULATION_OF_MONONUCLEAR_CELL_MIGRATION	74	2.08466	0	0.000223219
M5 GO Biological Process	GOBP_POSITIVE_REGULATION_OF_LEUKOCYTE_PROLIFERATION	183	2.0826	0	0.000234664
M5 GO Biological Process	GOBP_BONE_RESORPTION	76	2.08207	0	0.000233776
M5 GO Biological Process	GOBP_NEGATIVE_REGULATION_OF_B_CELL_ACTIVATION	37	2.08125	0	0.000237021
M5 GO Biological Process	GOBP_LEUKOCYTE_CELL_CELL_ADHESION	416	2.08115	0	0.00023613
M5 GO Biological Process	GOBP_IMMUNE_RESPONSE_REGULATING_CELL_SURFACE_RECEPTOR_SIGNALING_PATHWAY	279	2.08084	0	0.000235246
M5 GO Biological Process	GOBP_REGULATION_OF_ACUTE_INFLAMMATORY_RESPONSE	62	2.07976	0	0.000234368
M5 GO Molecular Function	GOMF_MANNOSE_BINDING	33	2.07649	0	0.000257571
M5 GO Biological Process	GOBP_REGULATION_OF_INTEGRIN_MEDIATED_SIGNALING_PATHWAY	20	2.07645	0	0.000256617
M2 Reactome pathway	REACTOME_ECM_PROTEOGLYCANS	47	2.07512	0	0.00025567
M5 GO Biological Process	GOBP_INTERFERON_MEDIATED_SIGNALING_PATHWAY	79	2.0749	0	0.000258739
M5 GO Biological Process	GOBP_POSITIVE_REGULATION_OF_LEUKOCYTE_CELL_CELL_ADHESION	280	2.07381	0	0.000261791
M5 GO Molecular Function	GOMF_PHOSPHATIDYLINOSITOL_3_4_BISPHOSPHATE_BINDING	30	2.0735	0	0.000260835
M5 GO Biological Process	GOBP_REGULATION_OF_MONOCYTE_CHEMOTAXIS	31	2.07287	0	0.000263748
M5 GO Biological Process	GOBP_RESPONSE_TO_INTERFERON_ALPHA	30	2.0719	0	0.000274668
M5 GO Biological Process	GOBP_T_CELL_CHEMOTAXIS	21	2.07161	0	0.000273677
M5 GO Biological Process	GOBP_PINOCYTOSIS	22	2.07079	0	0.000276583
M2 Reactome pathway	REACTOME_O_LINKED_GLYCOSYLATION_OF_MUCINS	54	2.0675	0	0.00028732
M5 GO Molecular Function	GOMF_CHEMOKINE_RECEPTOR_BINDING	58	2.06745	0	0.000286294
M5 GO Biological Process	GOBP_POSITIVE_REGULATION_OF_ALPHA_BETA_T_CELL_PROLIFERATION	40	2.06698	0	0.000285275
M5 GO Molecular Function	GOMF_SIGNALING_ADAPTOR_ACTIVITY	86	2.06689	0	0.000284263
M5 GO Cellular Component	GOCC_ENDOPLASMIC_RETICULUM_EXIT_SITE	31	2.06623	0	0.00028713
M5 GO Biological Process	GOBP_ENDOTHELIAL_CELL_MIGRATION	225	2.06599	0	0.000286119
M5 GO Biological Process	GOBP_POSITIVE_REGULATION_OF_T_CELL_MEDIATED_IMMUNITY	72	2.06554	0	0.000285115
M5 GO Biological Process	GOBP_NEGATIVE_REGULATION_OF_PRODUCTION_OF_MOLECULAR_MEDIATOR_OF_IMMUNE_RESPONSE	46	2.0642	0	0.000295492
M5 GO Biological Process	GOBP_POSITIVE_REGULATION_OF_T_CELL_PROLIFERATION	124	2.06283	0	0.000302017
M5 GO Biological Process	GOBP_REGULATION_OF_NEUTROPHIL_ACTIVATION	15	2.06221	0.00171821	0.000304668
M5 GO Biological Process	GOBP_POSITIVE_REGULATION_OF_MACROPHAGE_CYTOKINE_PRODUCTION	29	2.06213	0	0.000303613
M5 GO Cellular Component	GOCC_COLLAGEN_TRIMER	80	2.061	0	0.000310007
M5 GO Biological Process	GOBP_POSITIVE_REGULATION_OF_ALPHA_BETA_T_CELL_DIFFERENTIATION	50	2.05851	0	0.00034603
M5 GO Biological Process	GOBP_POSITIVE_REGULATION_OF_T_HELPER_1_TYPE_IMMUNE_RESPONSE	19	2.05776	0	0.000352217
M5 GO Biological Process	GOBP_TISSUE_MIGRATION	326	2.05705	0	0.000362092
M5 GO Biological Process	GOBP_HEAT_GENERATION	22	2.05681	0	0.00036086
M5 GO Biological Process	GOBP_T_CELL_CYTOKINE_PRODUCTION	48	2.05592	0	0.000359637
M2 Reactome pathway	REACTOME_SIGNALING_BY_PDGF	53	2.05234	0	0.00036933
M5 GO Cellular Component	GOCC_PROTEIN_COMPLEX_INVOLVED_IN_CELL_ADHESION	56	2.05196	0	0.000368087
M5 GO Molecular Function	GOMF_EPIDERMAL_GROWTH_FACTOR_RECEPTOR_BINDING	38	2.0506	0	0.00037775
M5 GO Biological Process	GOBP_REGULATION_OF_HUMORAL_IMMUNE_RESPONSE	48	2.04923	0	0.000383792
M5 GO Biological Process	GOBP_COLLAGEN_METABOLIC_PROCESS	121	2.04617	0	0.000418498
M5 GO Biological Process	GOBP_INTERLEUKIN_17_PRODUCTION	46	2.04418	0	0.000435122
M5 GO Biological Process	GOBP_ANTIMICROBIAL_HUMORAL_IMMUNE_RESPONSE_MEDIATED_BY_ANTIMICROBIAL_PEPTIDE	76	2.04254	0	0.000440776
M2 Reactome pathway	REACTOME_NCAM1_INTERACTIONS	17	2.04209	0	0.000439322
M5 GO Biological Process	GOBP_POSITIVE_REGULATION_OF_CELLULAR_EXTRAVASATION	22	2.04039	0	0.000452053
M5 GO Biological Process	GOBP_REGULATION_OF_T_CELL_MEDIATED_CYTOTOXICITY	49	2.03977	0	0.000461169
M5 GO Biological Process	GOBP_NEGATIVE_REGULATION_OF_LEUKOCYTE_PROLIFERATION	102	2.03976	0	0.000459661
M5 GO Biological Process	GOBP_REGULATION_OF_RESPONSE_TO_CYTOKINE_STIMULUS	153	2.03899	0	0.000475901
M5 GO Cellular Component	GOCC_EARLY_ENDOSOME	348	2.03803	0	0.000491913
M5 GO Biological Process	GOBP_REGULATION_OF_B_CELL_ACTIVATION	139	2.03794	0	0.000490321
M5 GO Biological Process	GOBP_FC_RECEPTOR_MEDIATED_STIMULATORY_SIGNALING_PATHWAY	17	2.0368	0	0.000492239
M5 GO Biological Process	GOBP_POSITIVE_REGULATION_OF_MACROPHAGE_MIGRATION	30	2.0359	0	0.000494067
M5 GO Biological Process	GOBP_POSITIVE_REGULATION_OF_CELL_SUBSTRATE_ADHESION	136	2.03529	0	0.000495949
M2 Reactome pathway	REACTOME_PLATELET_ACTIVATION_SIGNALING_AND_AGGREGATION	251	2.03473	0	0.000497817
M5 GO Biological Process	GOBP_INFLAMMATORY_RESPONSE_TO_WOUNDING	31	2.03457	0	0.000496232
M5 GO Biological Process	GOBP_BLOOD_VESSEL_ENDOTHELIAL_CELL_MIGRATION	122	2.03403	0	0.000498132
M5 GO Biological Process	GOBP_INFLAMMASOME_MEDIATED_SIGNALING_PATHWAY	43	2.03361	0	0.000500036
MH Hallmark	HALLMARK_PROTEIN_SECRETION	93	2.03346	0	0.000498458
M5 GO Biological Process	GOBP_MATURE_B_CELL_DIFFERENTIATION	43	2.03342	0	0.000496891
M5 GO Biological Process	GOBP_REGULATION_OF_HEAT_GENERATION	16	2.0333	0	0.000502144
M5 GO Cellular Component	GOCC_MEMBRANE_MICRODOMAIN	296	2.03126	0	0.000534246
M5 GO Biological Process	GOBP_EXTRACELLULAR_STRUCTURE_ORGANIZATION	317	2.03085	0	0.000539356
M2 Reactome pathway	REACTOME_CROSSLINKING_OF_COLLAGEN_FIBRILS	16	2.03042	0	0.00054443
M5 GO Biological Process	GOBP_TYPE_II_INTERFERON_MEDIATED_SIGNALING_PATHWAY	23	2.03032	0	0.000542745
M5 GO Biological Process	GOBP_RESPONSE_TO_GROWTH_HORMONE	21	2.02881	0	0.00055776
M5 GO Biological Process	GOBP_REGULATION_OF_OSTEOCLAST_DIFFERENTIATION	86	2.02723	0	0.000562779
M5 GO Biological Process	GOBP_NEGATIVE_REGULATION_OF_INTERLEUKIN_12_PRODUCTION	19	2.0271	0	0.000564388
M5 GO Biological Process	GOBP_MYELOID_LEUKOCYTE_MEDIATED_IMMUNITY	131	2.02675	0	0.000572651
M2 Reactome pathway	REACTOME_SIGNALING_BY_VEGF	100	2.02621	0	0.000580839
M5 GO Biological Process	GOBP_OSTEOCLAST_DIFFERENTIATION	128	2.02441	0	0.000608754
M2 Reactome pathway	REACTOME_COLLAGEN_BIOSYNTHESIS_AND_MODIFYING_ENZYMES	65	2.02436	0	0.000610168
M5 GO Biological Process	GOBP_POSITIVE_REGULATION_OF_MYELOID_LEUKOCYTE_DIFFERENTIATION	72	2.02322	0	0.000618226
M5 GO Biological Process	GOBP_POSITIVE_REGULATION_OF_GRANULOCYTE_CHEMOTAXIS	29	2.02298	0	0.000616364
M5 GO Molecular Function	GOMF_PHOSPHOTYROSINE_RESIDUE_BINDING	48	2.02267	0	0.000620985
MH Hallmark	HALLMARK_HYPOXIA	195	2.02259	0	0.000622362
M2 WikiPathways pathway	WP_IL_2_SIGNALING_PATHWAY	75	2.02252	0	0.000620505
M5 GO Biological Process	GOBP_POSITIVE_REGULATION_OF_CELL_CELL_ADHESION	331	2.02097	0	0.000641156
M5 GO Biological Process	GOBP_NATURAL_KILLER_CELL_ACTIVATION	101	2.02096	0	0.000639253
M5 GO Biological Process	GOBP_MYELOID_CELL_ACTIVATION_INVOLVED_IN_IMMUNE_RESPONSE	106	2.02044	0	0.000646952
M5 GO Biological Process	GOBP_SUPEROXIDE_METABOLIC_PROCESS	70	2.02009	0	0.000645044
M5 GO Molecular Function	GOMF_CYTOKINE_RECEPTOR_ACTIVITY	96	2.01988	0	0.000649463
M5 GO Biological Process	GOBP_RESPONSE_TO_WOUNDING	488	2.01988	0	0.000647558
M5 GO Biological Process	GOBP_POSITIVE_REGULATION_OF_HUMORAL_IMMUNE_RESPONSE	23	2.01879	0	0.000651969
M5 GO Biological Process	GOBP_POSITIVE_REGULATION_OF_MACROPHAGE_CHEMOTAXIS	24	2.01543	0	0.000697612
M5 GO Biological Process	GOBP_REACTIVE_NITROGEN_SPECIES_METABOLIC_PROCESS	92	2.01485	0	0.000708243
M5 GO Biological Process	GOBP_NEGATIVE_REGULATION_OF_VIRAL_PROCESS	98	2.01481	0	0.00070619
M5 GO Biological Process	GOBP_AMEBOIDAL_TYPE_CELL_MIGRATION	463	2.0142	0	0.00070728
M5 GO Biological Process	GOBP_NEGATIVE_REGULATION_OF_LYMPHOCYTE_ACTIVATION	171	2.01384	0	0.00071469
M5 GO Cellular Component	GOCC_GOLGI_CISTERNA	66	2.01323	0	0.000718895
M5 GO Biological Process	GOBP_NEUTROPHIL_EXTRAVASATION	15	2.01121	0	0.000744674
M5 GO Molecular Function	GOMF_SCAVENGER_RECEPTOR_ACTIVITY	43	2.01094	0	0.000745641
M5 GO Biological Process	GOBP_REGULATION_OF_MACROPHAGE_CHEMOTAXIS	32	2.01087	0	0.000746598
M5 GO Biological Process	GOBP_LAMELLIPODIUM_MORPHOGENESIS	16	2.01031	0	0.000747556
M5 GO Biological Process	GOBP_NEGATIVE_REGULATION_OF_CYTOKINE_PRODUCTION_INVOLVED_IN_IMMUNE_RESPONSE	33	2.00996	0	0.000748558
M5 GO Cellular Component	GOCC_EXTRACELLULAR_ORGANELLE	110	2.00963	0	0.000746443
M5 GO Biological Process	GOBP_REGULATION_OF_B_CELL_DIFFERENTIATION	37	2.00821	0	0.000762621
M5 GO Biological Process	GOBP_INTERLEUKIN_12_PRODUCTION	65	2.00682	0	0.00077868
M5 GO Biological Process	GOBP_REGULATION_OF_ALPHA_BETA_T_CELL_ACTIVATION	131	2.00639	0	0.000785539
M5 GO Biological Process	GOBP_REGULATION_OF_MYELOID_LEUKOCYTE_DIFFERENTIATION	141	2.00626	0	0.000783345
M5 GO Biological Process	GOBP_REGULATION_OF_RESPONSE_TO_OXIDATIVE_STRESS	36	2.00604	0	0.000787182
M5 GO Biological Process	GOBP_POSITIVE_REGULATION_OF_EXTRINSIC_APOPTOTIC_SIGNALING_PATHWAY	63	2.00578	0	0.000784995
M5 GO Biological Process	GOBP_REGULATION_OF_MACROPHAGE_ACTIVATION	56	2.00576	0	0.00078282
M2 WikiPathways pathway	WP_FIBRIN_COMPLEMENT_RECEPTOR_3_SIGNALING_PATHWAY	43	2.00385	0.00157233	0.000807518
M5 GO Biological Process	GOBP_LEUKOCYTE_APOPTOTIC_PROCESS	133	2.00328	0	0.000814234
M2 Reactome pathway	REACTOME_CLASS_A_1_RHODOPSIN_LIKE_RECEPTORS	284	2.00311	0	0.000814984
M5 GO Biological Process	GOBP_REGULATION_OF_EPITHELIAL_CELL_MIGRATION	245	2.00308	0	0.000812751
M5 GO Biological Process	GOBP_COLLAGEN_FIBRIL_ORGANIZATION	61	2.00308	0	0.000810531
M5 GO Biological Process	GOBP_TYPE_I_INTERFERON_PRODUCTION	133	2.00299	0	0.000808322
M5 GO Biological Process	GOBP_LAMELLIPODIUM_ORGANIZATION	92	2.00231	0	0.000809062
M5 GO Biological Process	GOBP_INFLAMMATORY_RESPONSE_TO_ANTIGENIC_STIMULUS	84	2.00193	0	0.000815665
M5 GO Biological Process	GOBP_REGULATION_OF_SUPEROXIDE_ANION_GENERATION	29	2.00144	0	0.000831119
M5 GO Biological Process	GOBP_POSITIVE_REGULATION_OF_NF_KAPPAB_TRANSCRIPTION_FACTOR_ACTIVITY	152	2.00005	0	0.000858074
M5 GO Molecular Function	GOMF_NON_MEMBRANE_SPANNING_PROTEIN_TYROSINE_KINASE_ACTIVITY	45	1.99992	0	0.000861549
M5 GO Biological Process	GOBP_CELL_SUBSTRATE_ADHESION	364	1.99859	0	0.000882535
M5 GO Molecular Function	GOMF_PEPTIDOGLYCAN_BINDING	15	1.99815	0	0.000883086
M5 GO Biological Process	GOBP_BONE_REMODELING	102	1.99772	0	0.000886556
M5 GO Biological Process	GOBP_CELLULAR_RESPONSE_TO_VIRUS	47	1.99771	0	0.000884198
M5 GO Molecular Function	GOMF_CYTOKINE_BINDING	141	1.99761	0	0.000881853
M5 GO Molecular Function	GOMF_MHC_PROTEIN_COMPLEX_BINDING	21	1.99568	0	0.000899579
M5 GO Biological Process	GOBP_POSITIVE_REGULATION_OF_LEUKOCYTE_TETHERING_OR_ROLLING	15	1.99476	0	0.000920163
M5 GO Biological Process	GOBP_NEGATIVE_REGULATION_OF_TYPE_II_INTERFERON_PRODUCTION	40	1.99475	0	0.000917742
M5 GO Biological Process	GOBP_HOMOTYPIC_CELL_CELL_ADHESION	86	1.99428	0	0.000923797
M5 GO Biological Process	GOBP_POSITIVE_REGULATION_OF_ENDOTHELIAL_CELL_PROLIFERATION	100	1.99387	0	0.000929904
M5 GO Biological Process	GOBP_SURFACTANT_HOMEOSTASIS	28	1.99318	0.00165017	0.000927476
M5 GO Biological Process	GOBP_POSITIVE_REGULATION_OF_ERK1_AND_ERK2_CASCADE	224	1.99266	0	0.00093068
M5 GO Biological Process	GOBP_ANTIMICROBIAL_HUMORAL_RESPONSE	118	1.99252	0	0.000931092
M5 GO Biological Process	GOBP_REGULATION_OF_CELL_MIGRATION_INVOLVED_IN_SPROUTING_ANGIOGENESIS	39	1.99226	0	0.000931473
M5 GO Biological Process	GOBP_ENTRY_INTO_HOST	98	1.99217	0	0.000929066
M2 Reactome pathway	REACTOME_GPVI_MEDIATED_ACTIVATION_CASCADE	34	1.99154	0	0.000935016
M5 GO Biological Process	GOBP_TOLL_LIKE_RECEPTOR_3_SIGNALING_PATHWAY	31	1.98575	0.00171821	0.00102751
M2 BioCarta pathway	BIOCARTA_CASPASE_PATHWAY	22	1.98546	0	0.00102487
M5 GO Biological Process	GOBP_REGULATION_OF_SYNCYTIUM_FORMATION_BY_PLASMA_MEMBRANE_FUSION	34	1.98507	0	0.00102777
M5 GO Biological Process	GOBP_SUPEROXIDE_ANION_GENERATION	46	1.98398	0	0.00105
M5 GO Biological Process	GOBP_REGULATION_OF_LEUKOCYTE_TETHERING_OR_ROLLING	19	1.98339	0	0.00105557
M5 GO Cellular Component	GOCC_ENDOCYTIC_VESICLE_MEMBRANE	45	1.98181	0	0.00108317
M2 Reactome pathway	REACTOME_GPCR_LIGAND_BINDING	350	1.98169	0	0.00108315
M5 GO Molecular Function	GOMF_PROTEIN_TYROSINE_KINASE_ACTIVATOR_ACTIVITY	31	1.97926	0	0.00112407
M5 GO Molecular Function	GOMF_SH3_DOMAIN_BINDING	129	1.97908	0	0.00112124
M5 GO Biological Process	GOBP_REGULATION_OF_PLATELET_ACTIVATION	44	1.97868	0.00166113	0.0011348
M5 GO Biological Process	GOBP_DENDRITIC_CELL_DIFFERENTIATION	42	1.97839	0	0.00114011
M5 GO Molecular Function	GOMF_CELL_ADHESION_MOLECULE_BINDING	301	1.97812	0	0.00114531
M5 GO Biological Process	GOBP_POSITIVE_REGULATION_OF_EPITHELIAL_CELL_MIGRATION	161	1.97783	0	0.00115329
M5 GO Molecular Function	GOMF_MHC_PROTEIN_BINDING	43	1.97723	0	0.00117195
M2 BioCarta pathway	BIOCARTA_CCR5_PATHWAY	16	1.97722	0	0.00116904
M5 GO Biological Process	GOBP_REGULATION_OF_BIOLOGICAL_PROCESS_INVOLVED_IN_SYMBIOTIC_INTERACTION	61	1.97646	0	0.00117949
M5 GO Cellular Component	GOCC_EARLY_ENDOSOME_MEMBRANE	97	1.97564	0	0.0011873
M2 BioCarta pathway	BIOCARTA_NKT_PATHWAY	27	1.97516	0	0.00118968
M5 GO Biological Process	GOBP_B_CELL_DIFFERENTIATION	151	1.97503	0	0.00118944
M5 GO Biological Process	GOBP_NEGATIVE_REGULATION_OF_INTERLEUKIN_10_PRODUCTION	20	1.97422	0.00178571	0.00119977
M5 GO Biological Process	GOBP_LYMPHOCYTE_ACTIVATION_INVOLVED_IN_IMMUNE_RESPONSE	199	1.97347	0	0.00121007
M5 GO Molecular Function	GOMF_UDP_GLYCOSYLTRANSFERASE_ACTIVITY	136	1.97333	0	0.00120712
M5 GO Biological Process	GOBP_REGULATION_OF_DNA_TEMPLATED_TRANSCRIPTION_IN_RESPONSE_TO_STRESS	42	1.97265	0	0.00121208
M2 WikiPathways pathway	WP_FOCAL_ADHESION_PI3K_AKT_MTOR_SIGNALING_PATHWAY	299	1.97251	0	0.00120913
M5 GO Biological Process	GOBP_REGULATION_OF_BONE_RESORPTION	50	1.97098	0	0.00123243
M5 GO Biological Process	GOBP_CANONICAL_NF_KAPPAB_SIGNAL_TRANSDUCTION	243	1.97057	0	0.00123205
M2 Reactome pathway	REACTOME_INTERFERON_ALPHA_BETA_SIGNALING	21	1.97056	0	0.00122908
M2 WikiPathways pathway	WP_SPINAL_CORD_INJURY	97	1.9702	0	0.00123136
M5 GO Biological Process	GOBP_RECEPTOR_SIGNALING_PATHWAY_VIA_STAT	169	1.96958	0	0.00123618
M5 GO Cellular Component	GOCC_GOLGI_MEMBRANE	254	1.96882	0	0.00124875
M5 GO Cellular Component	GOCC_MHC_PROTEIN_COMPLEX	27	1.96709	0	0.00127934
M5 GO Biological Process	GOBP_INTERLEUKIN_1_MEDIATED_SIGNALING_PATHWAY	27	1.9669	0	0.00127629
M5 GO Biological Process	GOBP_DENDRITIC_CELL_CYTOKINE_PRODUCTION	19	1.96549	0	0.00130668
M5 GO Biological Process	GOBP_POSITIVE_REGULATION_OF_INTERFERON_BETA_PRODUCTION	51	1.96521	0	0.00130359
M5 GO Biological Process	GOBP_POSITIVE_REGULATION_OF_INTERLEUKIN_2_PRODUCTION	41	1.9647	0	0.00130566
M5 GO Biological Process	GOBP_NEGATIVE_REGULATION_OF_ACTIVATED_T_CELL_PROLIFERATION	16	1.96222	0	0.00133577
M5 GO Biological Process	GOBP_REGULATION_OF_NATURAL_KILLER_CELL_MEDIATED_IMMUNITY	70	1.96207	0	0.00133517
M5 GO Molecular Function	GOMF_SERINE_HYDROLASE_ACTIVITY	183	1.96132	0	0.0013473
M5 GO Biological Process	GOBP_VASCULAR_PROCESS_IN_CIRCULATORY_SYSTEM	243	1.96049	0	0.00136192
M5 GO Biological Process	GOBP_NEGATIVE_REGULATION_OF_TISSUE_REMODELING	26	1.96049	0	0.00135874
M5 GO Biological Process	GOBP_NEGATIVE_REGULATION_OF_ENDOTHELIAL_CELL_PROLIFERATION	46	1.96011	0	0.00135808
M5 GO Biological Process	GOBP_POSITIVE_REGULATION_OF_BLOOD_VESSEL_ENDOTHELIAL_CELL_MIGRATION	57	1.95893	0	0.00138261
M5 GO Biological Process	GOBP_GLYCOPROTEIN_CATABOLIC_PROCESS	31	1.95849	0	0.00138442
M2 WikiPathways pathway	WP_TOLL_LIKE_RECEPTOR_SIGNALING	32	1.9572	0	0.00141118
M5 GO Biological Process	GOBP_ERK1_AND_ERK2_CASCADE	348	1.95678	0	0.00141791
M5 GO Biological Process	GOBP_LEUKOCYTE_HOMEOSTASIS	139	1.95667	0	0.00141464
M5 GO Biological Process	GOBP_CELL_MIGRATION_INVOLVED_IN_SPROUTING_ANGIOGENESIS	54	1.95636	0	0.00142878
M5 GO Biological Process	GOBP_GLYCOPROTEIN_METABOLIC_PROCESS	340	1.95633	0	0.0014255
M5 GO Biological Process	GOBP_MAST_CELL_MIGRATION	17	1.95492	0	0.00145442
M5 GO Molecular Function	GOMF_IMMUNOGLOBULIN_BINDING	23	1.9549	0	0.00145355
M2 WikiPathways pathway	WP_FOCAL_ADHESION	185	1.95484	0	0.00145024
M5 GO Biological Process	GOBP_B_CELL_PROLIFERATION	100	1.95406	0	0.00146666
M5 GO Molecular Function	GOMF_GALACTOSYLTRANSFERASE_ACTIVITY	27	1.95394	0	0.00146334
M5 GO Biological Process	GOBP_POSITIVE_REGULATION_OF_LYMPHOCYTE_ACTIVATION	336	1.95387	0	0.00146247
M5 GO Biological Process	GOBP_NEGATIVE_REGULATION_OF_LEUKOCYTE_MIGRATION	43	1.95319	0	0.0014787
M5 GO Molecular Function	GOMF_PHOSPHATIDYLINOSITOL_4_PHOSPHATE_BINDING	38	1.95305	0	0.00147785
M5 GO Biological Process	GOBP_POSITIVE_REGULATION_OF_MAP_KINASE_ACTIVITY	129	1.95273	0	0.00148419
M5 GO Biological Process	GOBP_MYELOID_DENDRITIC_CELL_DIFFERENTIATION	24	1.95267	0	0.00148087
M5 GO Biological Process	GOBP_POSITIVE_REGULATION_OF_CELL_MIGRATION_INVOLVED_IN_SPROUTING_ANGIOGENESIS	21	1.95229	0	0.00148969
M5 GO Molecular Function	GOMF_HEXOSYLTRANSFERASE_ACTIVITY	179	1.95135	0	0.0015105
M5 GO Biological Process	GOBP_REGULATION_OF_CELL_ADHESION_MEDIATED_BY_INTEGRIN	47	1.95116	0	0.00151438
M5 GO Biological Process	GOBP_B_CELL_ACTIVATION	281	1.95108	0	0.00151583
M5 GO Biological Process	GOBP_REGULATION_OF_CELL_CELL_ADHESION	500	1.95108	0	0.00151247
M5 GO Biological Process	GOBP_PLATELET_DERIVED_GROWTH_FACTOR_RECEPTOR_SIGNALING_PATHWAY	63	1.9509	0	0.00151151
M5 GO Biological Process	GOBP_REGULATION_OF_PATTERN_RECOGNITION_RECEPTOR_SIGNALING_PATHWAY	135	1.94924	0	0.00154647
M5 GO Biological Process	GOBP_ESTROGEN_METABOLIC_PROCESS	30	1.94918	0.00165289	0.00154306
M5 GO Biological Process	GOBP_RECEPTOR_MEDIATED_ENDOCYTOSIS	266	1.94837	0	0.00155631
M5 GO Cellular Component	GOCC_ENDOSOME_MEMBRANE	304	1.94739	0	0.00158141
M5 GO Biological Process	GOBP_REGULATION_OF_T_CELL_RECEPTOR_SIGNALING_PATHWAY	49	1.94663	0	0.00159927
M5 GO Biological Process	GOBP_ACTIVATED_T_CELL_PROLIFERATION	52	1.94605	0	0.00161462
M5 GO Biological Process	GOBP_NATURAL_KILLER_CELL_MEDIATED_IMMUNITY	93	1.94594	0	0.00161348
M5 GO Biological Process	GOBP_REGULATION_OF_CD4_POSITIVE_ALPHA_BETA_T_CELL_ACTIVATION	77	1.94573	0	0.00161232
M5 GO Biological Process	GOBP_REGULATION_OF_INFLAMMASOME_MEDIATED_SIGNALING_PATHWAY	37	1.9457	0	0.00161349
M5 GO Biological Process	GOBP_NEGATIVE_REGULATION_OF_CELL_ADHESION	306	1.94565	0	0.00161
M5 GO Molecular Function	GOMF_PEPTIDASE_REGULATOR_ACTIVITY	223	1.94543	0	0.0016112
M5 GO Biological Process	GOBP_TOLERANCE_INDUCTION	43	1.94439	0	0.00163345
MH Hallmark	HALLMARK_ANGIOGENESIS	36	1.94332	0	0.00165332
M5 GO Cellular Component	GOCC_GOLGI_ASSOCIATED_VESICLE	95	1.94232	0	0.00167294
M2 WikiPathways pathway	WP_PROSTAGLANDIN_SYNTHESIS_AND_REGULATION	29	1.94224	0	0.00167399
M5 GO Biological Process	GOBP_MATURE_B_CELL_DIFFERENTIATION_INVOLVED_IN_IMMUNE_RESPONSE	34	1.94191	0	0.00167506
M2 BioCarta pathway	BIOCARTA_EICOSANOID_PATHWAY	20	1.94112	0.00166389	0.00168997
M5 GO Biological Process	GOBP_REGULATION_OF_DEFENSE_RESPONSE_TO_VIRUS	97	1.9408	0	0.00169798
M5 GO Biological Process	GOBP_MOVEMENT_IN_HOST	118	1.94062	0	0.00169668
M5 GO Biological Process	GOBP_POSITIVE_REGULATION_OF_REACTIVE_OXYGEN_SPECIES_METABOLIC_PROCESS	84	1.94033	0	0.00170457
M2 Reactome pathway	REACTOME_SIGNALING_BY_MET	69	1.93939	0	0.00173308
M5 GO Biological Process	GOBP_NEGATIVE_REGULATION_OF_INFLAMMATORY_RESPONSE	156	1.93918	0	0.00173173
M5 GO Biological Process	GOBP_REGULATION_OF_BLOOD_VESSEL_ENDOTHELIAL_CELL_MIGRATION	94	1.93883	0	0.00173719
M5 GO Biological Process	GOBP_REGULATION_OF_T_CELL_ACTIVATION	386	1.93752	0	0.00176313
M5 GO Biological Process	GOBP_MHC_CLASS_II_BIOSYNTHETIC_PROCESS	17	1.93612	0.00171821	0.00181167
M5 GO Cellular Component	GOCC_IMMUNOLOGICAL_SYNAPSE	45	1.93484	0	0.00183964
M5 GO Molecular Function	GOMF_PHOSPHATIDYLINOSITOL_BINDING	289	1.93443	0	0.00184713
M5 GO Molecular Function	GOMF_ENDOPEPTIDASE_ACTIVITY	373	1.93282	0	0.0018998
M5 GO Biological Process	GOBP_REGULATION_OF_B_CELL_PROLIFERATION	70	1.93259	0	0.00189808
M5 GO Biological Process	GOBP_LIVER_MORPHOGENESIS	36	1.93252	0	0.00189864
M5 GO Biological Process	GOBP_NEGATIVE_REGULATION_OF_DEFENSE_RESPONSE	287	1.93165	0	0.00192599
M5 GO Molecular Function	GOMF_VASCULAR_ENDOTHELIAL_GROWTH_FACTOR_RECEPTOR_BINDING	16	1.93114	0.00166945	0.00193324
M2 Reactome pathway	REACTOME_MET_PROMOTES_CELL_MOTILITY	32	1.93108	0	0.00193149
M2 Reactome pathway	REACTOME_PEPTIDE_LIGAND_BINDING_RECEPTORS	171	1.92958	0	0.00197653
M5 GO Biological Process	GOBP_POSITIVE_REGULATION_OF_OSTEOCLAST_DIFFERENTIATION	38	1.92934	0	0.00197923
M5 GO Biological Process	GOBP_POSITIVE_REGULATION_OF_MEMBRANE_INVAGINATION	17	1.92898	0.0017301	0.00197961
M5 GO Molecular Function	GOMF_EXTRACELLULAR_MATRIX_BINDING	58	1.92697	0	0.00202215
M2 WikiPathways pathway	WP_BURN_WOUND_HEALING	15	1.92631	0	0.00203563
M2 Reactome pathway	REACTOME_ANTIMICROBIAL_PEPTIDES	42	1.92525	0	0.00206675
M5 GO Biological Process	GOBP_POSITIVE_REGULATION_OF_INTERLEUKIN_12_PRODUCTION	44	1.92479	0	0.00207799
M5 GO Molecular Function	GOMF_ENDOPEPTIDASE_ACTIVATOR_ACTIVITY	16	1.9246	0	0.00208258
M5 GO Cellular Component	GOCC_GOLGI_STACK	91	1.92342	0	0.00212654
M5 GO Biological Process	GOBP_REGULATION_OF_CELLULAR_RESPONSE_TO_OXIDATIVE_STRESS	26	1.92239	0	0.00215506
M5 GO Biological Process	GOBP_NEGATIVE_REGULATION_OF_COAGULATION	48	1.92188	0	0.00216812
M5 GO Biological Process	GOBP_REGULATION_OF_BODY_FLUID_LEVELS	319	1.92185	0	0.00216376
M5 GO Biological Process	GOBP_POSITIVE_REGULATION_OF_SYNCYTIUM_FORMATION_BY_PLASMA_MEMBRANE_FUSION	26	1.92096	0.00171233	0.00218989
M5 GO Biological Process	GOBP_ACTIVATION_OF_CYSTEINE_TYPE_ENDOPEPTIDASE_ACTIVITY_INVOLVED_IN_APOPTOTIC_PROCESS	77	1.9206	0	0.00219856
M2 Reactome pathway	REACTOME_RAC1_GTPASE_CYCLE	171	1.92035	0	0.00220063
M5 GO Biological Process	GOBP_NATURAL_KILLER_CELL_ACTIVATION_INVOLVED_IN_IMMUNE_RESPONSE	22	1.9201	0	0.00220488
M5 GO Biological Process	GOBP_POSITIVE_REGULATION_OF_MONOCYTE_CHEMOTAXIS	23	1.92003	0	0.00220049
M5 GO Biological Process	GOBP_AMYLOID_BETA_CLEARANCE	37	1.9198	0.00165837	0.00220039
M5 GO Biological Process	GOBP_NEGATIVE_REGULATION_OF_VIRAL_LIFE_CYCLE	34	1.91929	0.00340136	0.0021982
M5 GO Biological Process	GOBP_REGULATION_OF_ANTIGEN_RECEPTOR_MEDIATED_SIGNALING_PATHWAY	65	1.91909	0	0.00219811
M5 GO Biological Process	GOBP_POSITIVE_REGULATION_OF_APOPTOTIC_SIGNALING_PATHWAY	167	1.91717	0	0.00225369
M2 WikiPathways pathway	WP_GPCRS_SMALL_LIGAND	17	1.91513	0	0.00230702
M5 GO Biological Process	GOBP_POSITIVE_REGULATION_OF_MYELOID_CELL_DIFFERENTIATION	112	1.91445	0	0.00232175
M5 GO Biological Process	GOBP_T_CELL_ACTIVATION_INVOLVED_IN_IMMUNE_RESPONSE	109	1.91437	0	0.00232146
M5 GO Biological Process	GOBP_REGULATION_OF_T_HELPER_17_TYPE_IMMUNE_RESPONSE	31	1.91357	0	0.00234235
M5 GO Biological Process	GOBP_MYELOID_DENDRITIC_CELL_ACTIVATION	38	1.91309	0	0.00234841
M5 GO Biological Process	GOBP_NEGATIVE_REGULATION_OF_CELL_CELL_ADHESION	203	1.91189	0	0.00237981
M2 Reactome pathway	REACTOME_MET_ACTIVATES_PTK2_SIGNALING	21	1.9117	0	0.00238358
M2 BioCarta pathway	BIOCARTA_CARDIACEGF_PATHWAY	18	1.91169	0	0.00237894
M2 Reactome pathway	REACTOME_RHO_GTPASES_ACTIVATE_WASPS_AND_WAVES	32	1.9116	0	0.00237854
M5 GO Biological Process	GOBP_GLYCOSYLATION	215	1.91084	0	0.00239907
M2 Reactome pathway	REACTOME_SIGNALING_BY_RECEPTOR_TYROSINE_KINASES	400	1.91055	0	0.00240073
M5 GO Biological Process	GOBP_NEGATIVE_REGULATION_OF_NERVOUS_SYSTEM_PROCESS	24	1.91035	0	0.00241081
M5 GO Biological Process	GOBP_NEGATIVE_REGULATION_OF_TUMOR_NECROSIS_FACTOR_SUPERFAMILY_CYTOKINE_PRODUCTION	67	1.91031	0	0.00240617
M5 GO Biological Process	GOBP_REGULATION_OF_BONE_REMODELING	60	1.90902	0	0.00245556
M5 GO Biological Process	GOBP_LEUKOCYTE_AGGREGATION	17	1.90762	0	0.00249667
M5 GO Biological Process	GOBP_SPROUTING_ANGIOGENESIS	131	1.90737	0	0.00250021
M2 WikiPathways pathway	WP_APOPTOSIS_MODULATION_BY_HSP70	16	1.90608	0.0018018	0.00254305
M5 GO Biological Process	GOBP_REGULATION_OF_LEUKOCYTE_APOPTOTIC_PROCESS	104	1.90598	0	0.00254026
M2 Reactome pathway	REACTOME_COSTIMULATION_BY_THE_CD28_FAMILY	61	1.90533	0	0.0025623
M5 GO Molecular Function	GOMF_PROTEOGLYCAN_BINDING	40	1.90463	0	0.00258005
M5 GO Biological Process	GOBP_HYPERSENSITIVITY	28	1.90432	0	0.00258953
M5 GO Biological Process	GOBP_LYMPHOCYTE_COSTIMULATION	32	1.9031	0	0.00263601
M5 GO Molecular Function	GOMF_CARBOHYDRATE_BINDING	269	1.90256	0	0.00265361
M5 GO Molecular Function	GOMF_MANNOSIDASE_ACTIVITY	15	1.90235	0.00172414	0.00265884
M5 GO Biological Process	GOBP_REGULATION_OF_CELL_SUBSTRATE_ADHESION	224	1.90101	0	0.00269886
M5 GO Biological Process	GOBP_BASEMENT_MEMBRANE_ORGANIZATION	41	1.90099	0.00166667	0.00269379
M5 GO Biological Process	GOBP_ALPHA_BETA_T_CELL_ACTIVATION	202	1.90087	0	0.00269075
M5 GO Biological Process	GOBP_MICROGLIA_DIFFERENTIATION	15	1.90036	0.00520833	0.00269986
M5 GO Molecular Function	GOMF_NADPLUS_ADP_RIBOSYLTRANSFERASE_ACTIVITY	22	1.8998	0	0.0027232
M5 GO Biological Process	GOBP_REGULATION_OF_VIRAL_PROCESS	173	1.89938	0	0.00274443
M2 Reactome pathway	REACTOME_TOLL_LIKE_RECEPTOR_4_TLR4_CASCADE	115	1.89863	0	0.00276555
M5 GO Biological Process	GOBP_INNATE_IMMUNE_RESPONSE_ACTIVATING_CELL_SURFACE_RECEPTOR_SIGNALING_PATHWAY	80	1.89835	0	0.0027705
M5 GO Cellular Component	GOCC_BASEMENT_MEMBRANE	112	1.89813	0	0.00277341
M2 Reactome pathway	REACTOME_O_LINKED_GLYCOSYLATION	103	1.89793	0	0.00277426
M5 GO Cellular Component	GOCC_CANONICAL_INFLAMMASOME_COMPLEX	17	1.89736	0	0.00279114
M5 GO Biological Process	GOBP_NEGATIVE_REGULATION_OF_IMMUNOGLOBULIN_PRODUCTION	15	1.89674	0.00527241	0.00280398
M5 GO Biological Process	GOBP_FC_GAMMA_RECEPTOR_SIGNALING_PATHWAY	15	1.89656	0	0.00281082
M5 GO Biological Process	GOBP_REGULATION_OF_T_CELL_CHEMOTAXIS	15	1.89598	0	0.00282752
M5 GO Biological Process	GOBP_REGULATION_OF_NATURAL_KILLER_CELL_DIFFERENTIATION	18	1.89515	0	0.00284616
M5 GO Biological Process	GOBP_ENDOTHELIAL_CELL_DEVELOPMENT	69	1.89503	0	0.00284684
M5 GO Biological Process	GOBP_POSITIVE_REGULATION_OF_INTERLEUKIN_17_PRODUCTION	27	1.89385	0.00166389	0.00289123
M5 GO Biological Process	GOBP_ENDOTHELIUM_DEVELOPMENT	136	1.89337	0	0.00290963
M5 GO Biological Process	GOBP_NK_T_CELL_ACTIVATION	16	1.89271	0	0.00293788
M5 GO Biological Process	GOBP_BIOLOGICAL_PROCESS_INVOLVED_IN_INTERACTION_WITH_HOST	152	1.89231	0	0.0029542
M5 GO Biological Process	GOBP_REGULATION_OF_CANONICAL_NF_KAPPAB_SIGNAL_TRANSDUCTION	204	1.89176	0	0.00297632
M5 GO Biological Process	GOBP_COMPLEMENT_ACTIVATION	50	1.89115	0	0.00299448
M5 GO Biological Process	GOBP_REGULATION_OF_MAST_CELL_ACTIVATION_INVOLVED_IN_IMMUNE_RESPONSE	38	1.89098	0	0.00299887
M5 GO Biological Process	GOBP_HETEROTYPIC_CELL_CELL_ADHESION	56	1.89025	0	0.00302675
M5 GO Biological Process	GOBP_REGULATION_OF_BLOOD_VESSEL_ENDOTHELIAL_CELL_PROLIFERATION_INVOLVED_IN_SPROUTING_ANGIOGENESIS	17	1.88999	0	0.00303296
M5 GO Biological Process	GOBP_REGULATION_OF_MEMBRANE_INVAGINATION	21	1.88916	0	0.00306663
M5 GO Biological Process	GOBP_NEGATIVE_REGULATION_OF_T_CELL_PROLIFERATION	79	1.88891	0	0.00307472
M2 WikiPathways pathway	WP_IL_1_SIGNALING_PATHWAY	37	1.88825	0	0.00311586
M5 GO Biological Process	GOBP_REGULATION_OF_HUMORAL_IMMUNE_RESPONSE_MEDIATED_BY_CIRCULATING_IMMUNOGLOBULIN	18	1.88782	0.00178891	0.00312972
M2 Reactome pathway	REACTOME_METAL_ION_SLC_TRANSPORTERS	19	1.88687	0.00172117	0.0031783
M5 GO Biological Process	GOBP_NEGATIVE_REGULATION_OF_INNATE_IMMUNE_RESPONSE	104	1.8866	0	0.00318806
M5 GO Biological Process	GOBP_POSITIVE_REGULATION_OF_INFLAMMATORY_RESPONSE_TO_ANTIGENIC_STIMULUS	30	1.88636	0	0.00319001
M5 GO Molecular Function	GOMF_CYSTEINE_TYPE_ENDOPEPTIDASE_REGULATOR_ACTIVITY_INVOLVED_IN_APOPTOTIC_PROCESS	47	1.88554	0	0.00322092
M5 GO Biological Process	GOBP_POSITIVE_REGULATION_OF_CYTOSOLIC_CALCIUM_ION_CONCENTRATION	190	1.88551	0	0.00321714
M5 GO Biological Process	GOBP_ESTABLISHMENT_OF_ENDOTHELIAL_BARRIER	49	1.88514	0	0.00323062
M5 GO Biological Process	GOBP_PROTEIN_O_LINKED_GLYCOSYLATION	82	1.88495	0	0.0032364
M5 GO Biological Process	GOBP_POSITIVE_REGULATION_OF_PROTEIN_SERINE_THREONINE_KINASE_ACTIVITY	196	1.88484	0	0.0032364
M5 GO Biological Process	GOBP_POSITIVE_REGULATION_OF_VASCULAR_ENDOTHELIAL_GROWTH_FACTOR_PRODUCTION	27	1.8844	0	0.00324975
M5 GO Biological Process	GOBP_VIRAL_LIFE_CYCLE	237	1.88352	0	0.00328973
M5 GO Cellular Component	GOCC_COMPLEX_OF_COLLAGEN_TRIMERS	19	1.88276	0.00175439	0.00332954
M5 GO Biological Process	GOBP_NEGATIVE_REGULATION_OF_BONE_REMODELING	17	1.8822	0.0018018	0.00335024
M2 Reactome pathway	REACTOME_INITIAL_TRIGGERING_OF_COMPLEMENT	21	1.88157	0.0034965	0.0033747
M5 GO Biological Process	GOBP_INFLAMMATORY_CELL_APOPTOTIC_PROCESS	28	1.88137	0	0.00337828
M2 Reactome pathway	REACTOME_BINDING_AND_UPTAKE_OF_LIGANDS_BY_SCAVENGER_RECEPTORS	33	1.88041	0	0.00341012
M5 GO Biological Process	GOBP_REGULATION_OF_ENDOTHELIAL_CELL_MIGRATION	172	1.88009	0	0.00341922
M5 GO Biological Process	GOBP_POSITIVE_REGULATION_OF_MYOBLAST_FUSION	19	1.87995	0.00172117	0.00342638
M5 GO Cellular Component	GOCC_GOLGI_APPARATUS_SUBCOMPARTMENT	316	1.87942	0	0.00345043
M2 Reactome pathway	REACTOME_CTLA4_INHIBITORY_SIGNALING	21	1.87709	0.00170068	0.00356608
M2 Reactome pathway	REACTOME_NON_INTEGRIN_MEMBRANE_ECM_INTERACTIONS	30	1.87703	0	0.00356554
M5 GO Biological Process	GOBP_CGMP_MEDIATED_SIGNALING	33	1.87459	0.0015949	0.00366786
M5 GO Biological Process	GOBP_REGULATION_OF_TOLERANCE_INDUCTION	20	1.87418	0.00170648	0.00368576
M5 GO Molecular Function	GOMF_CCR_CHEMOKINE_RECEPTOR_BINDING	40	1.87415	0	0.00368128
M5 GO Biological Process	GOBP_XENOPHAGY	16	1.87405	0	0.00367496
M5 GO Biological Process	GOBP_REGULATION_OF_DEFENSE_RESPONSE_TO_VIRUS_BY_HOST	43	1.87352	0	0.00369833
M5 GO Biological Process	GOBP_ASTROCYTE_ACTIVATION	21	1.87245	0	0.00374208
M5 GO Biological Process	GOBP_POSITIVE_REGULATION_OF_MEMBRANE_PROTEIN_ECTODOMAIN_PROTEOLYSIS	16	1.87238	0	0.00373569
M5 GO Biological Process	GOBP_LEUKOCYTE_DEGRANULATION	86	1.8721	0	0.0037404
M5 GO Biological Process	GOBP_FIBROBLAST_MIGRATION	72	1.87163	0	0.00376733
MH Hallmark	HALLMARK_XENOBIOTIC_METABOLISM	194	1.87148	0	0.00376642
M5 GO Biological Process	GOBP_REGULATION_OF_HOMOTYPIC_CELL_CELL_ADHESION	35	1.87037	0	0.00383002
M5 GO Biological Process	GOBP_POSITIVE_REGULATION_OF_CANONICAL_NF_KAPPAB_SIGNAL_TRANSDUCTION	135	1.86988	0	0.00384378
M5 GO Molecular Function	GOMF_FIBRONECTIN_BINDING	36	1.86982	0.00171233	0.00383911
M2 WikiPathways pathway	WP_COMPLEMENT_ACTIVATION_CLASSICAL_PATHWAY	16	1.86969	0	0.00383626
M2 Reactome pathway	REACTOME_FCERI_MEDIATED_CA_2_MOBILIZATION	29	1.86964	0	0.00383163
M5 GO Biological Process	GOBP_RESPONSE_TO_PEPTIDE	440	1.86774	0	0.00393425
M2 Reactome pathway	REACTOME_NICOTINATE_METABOLISM	30	1.8671	0.00170068	0.00397124
M5 GO Biological Process	GOBP_ENDOPLASMIC_RETICULUM_TO_GOLGI_VESICLE_MEDIATED_TRANSPORT	122	1.8662	0	0.00401906
M5 GO Biological Process	GOBP_ANGIOGENESIS_INVOLVED_IN_WOUND_HEALING	25	1.86559	0.00334448	0.00403788
M5 GO Cellular Component	GOCC_RECYCLING_ENDOSOME	161	1.86527	0	0.00403838
M5 GO Molecular Function	GOMF_PHOSPHATIDYLINOSITOL_3_4_5_TRISPHOSPHATE_BINDING	45	1.86518	0.00170648	0.00404068
M5 GO Biological Process	GOBP_COMPLEMENT_ACTIVATION_CLASSICAL_PATHWAY	29	1.86445	0	0.00407175
M5 GO Biological Process	GOBP_VASCULAR_WOUND_HEALING	18	1.8641	0.00174825	0.00407757
M5 GO Biological Process	GOBP_TRANSFORMING_GROWTH_FACTOR_BETA1_PRODUCTION	15	1.86384	0.0017301	0.0040762
M5 GO Biological Process	GOBP_DENDRITIC_CELL_MIGRATION	24	1.86379	0.00171527	0.00407303
M5 GO Biological Process	GOBP_NEGATIVE_REGULATION_OF_RESPONSE_TO_BIOTIC_STIMULUS	155	1.86341	0	0.00409125
M5 GO Biological Process	GOBP_REGULATION_OF_VIRAL_LIFE_CYCLE	143	1.86328	0	0.00409344
M5 GO Biological Process	GOBP_PROGRAMMED_NECROTIC_CELL_DEATH	51	1.86269	0	0.00412064
M2 Reactome pathway	REACTOME_RESPONSE_TO_ELEVATED_PLATELET_CYTOSOLIC_CA2	126	1.86197	0	0.00415472
M5 GO Biological Process	GOBP_REGULATION_OF_LYMPHOCYTE_CHEMOTAXIS	21	1.86145	0.003367	0.00417468
M5 GO Biological Process	GOBP_CELL_MATRIX_ADHESION	232	1.86107	0	0.00418909
M5 GO Biological Process	GOBP_REGULATION_OF_PLATELET_AGGREGATION	24	1.8601	0.00171527	0.0042301
M2 WikiPathways pathway	WP_CYTOKINES_AND_INFLAMMATORY_RESPONSE	24	1.85991	0	0.004232
M5 GO Biological Process	GOBP_REGULATION_OF_COAGULATION	70	1.85988	0	0.00422688
M2 Reactome pathway	REACTOME_REGULATION_OF_INSULIN_LIKE_GROWTH_FACTOR_IGF_TRANSPORT_AND_UPTAKE_BY_INSULIN_LIKE_GROWTH_FACTOR_BINDING_PROTEINS_IGFBPS	114	1.85981	0	0.00422176
M5 GO Biological Process	GOBP_REACTIVE_OXYGEN_SPECIES_METABOLIC_PROCESS	240	1.85934	0	0.00424306
M5 GO Biological Process	GOBP_PROTEIN_N_LINKED_GLYCOSYLATION	61	1.85882	0.00168067	0.00426952
M5 GO Biological Process	GOBP_MODULATION_BY_SYMBIONT_OF_ENTRY_INTO_HOST	53	1.85807	0	0.00430294
M2 WikiPathways pathway	WP_PRIMARY_FOCAL_SEGMENTAL_GLOMERULOSCLEROSIS_FSGS	70	1.85778	0	0.00431173
M5 GO Biological Process	GOBP_SUBSTRATE_DEPENDENT_CELL_MIGRATION	30	1.85761	0	0.00431354
M2 Reactome pathway	REACTOME_PLATELET_AGGREGATION_PLUG_FORMATION	37	1.85729	0	0.00431705
M5 GO Cellular Component	GOCC_VACUOLAR_LUMEN	24	1.85709	0.00338409	0.0043223
M5 GO Biological Process	GOBP_POSITIVE_REGULATION_OF_INTERLEUKIN_10_PRODUCTION	44	1.85702	0	0.00431882
M5 GO Biological Process	GOBP_REGULATION_OF_TUBE_SIZE	184	1.8566	0	0.00434662
M5 GO Molecular Function	GOMF_EXOGENOUS_PROTEIN_BINDING	42	1.85513	0	0.00442471
M5 GO Biological Process	GOBP_REGULATION_OF_NITRIC_OXIDE_SYNTHASE_ACTIVITY	33	1.85495	0	0.00442455
M5 GO Biological Process	GOBP_POSITIVE_REGULATION_OF_NATURAL_KILLER_CELL_ACTIVATION	44	1.85449	0.00319489	0.00445556
M5 GO Biological Process	GOBP_PROTEIN_PROCESSING	249	1.85439	0	0.0044536
M5 GO Biological Process	GOBP_REGULATION_OF_MYOBLAST_FUSION	25	1.85366	0	0.00448947
M5 GO Cellular Component	GOCC_COATED_VESICLE	204	1.85356	0	0.00448576
M5 GO Biological Process	GOBP_POSITIVE_REGULATION_OF_TYPE_I_INTERFERON_PRODUCTION	81	1.85337	0	0.00448553
M5 GO Molecular Function	GOMF_METALLOENDOPEPTIDASE_ACTIVITY	102	1.85242	0	0.00452998
M5 GO Cellular Component	GOCC_GOLGI_CISTERNA_MEMBRANE	20	1.85119	0	0.00459111
M2 BioCarta pathway	BIOCARTA_COMP_PATHWAY	16	1.85102	0	0.00460612
M5 GO Biological Process	GOBP_ANTIGEN_PROCESSING_AND_PRESENTATION_OF_PEPTIDE_ANTIGEN_VIA_MHC_CLASS_I	40	1.85088	0	0.00461082
M5 GO Biological Process	GOBP_POSITIVE_REGULATION_OF_NITRIC_OXIDE_SYNTHASE_BIOSYNTHETIC_PROCESS	21	1.85039	0	0.00463082
M5 GO Molecular Function	GOMF_SIGNALING_RECEPTOR_COMPLEX_ADAPTOR_ACTIVITY	39	1.84999	0	0.00464741
M5 GO Biological Process	GOBP_VASCULAR_ENDOTHELIAL_GROWTH_FACTOR_PRODUCTION	38	1.84964	0.00167785	0.00465882
M5 GO Molecular Function	GOMF_G_PROTEIN_ACTIVITY	53	1.84923	0	0.00467016
M2 Reactome pathway	REACTOME_GLYCOSPHINGOLIPID_METABOLISM	41	1.84897	0	0.00468145
M5 GO Biological Process	GOBP_REGULATION_OF_INFLAMMATORY_RESPONSE_TO_ANTIGENIC_STIMULUS	50	1.84823	0	0.00470464
M5 GO Molecular Function	GOMF_PROTEIN_PHOSPHORYLATED_AMINO_ACID_BINDING	64	1.84799	0.00162866	0.00471417
M5 GO Biological Process	GOBP_POSITIVE_REGULATION_OF_CELL_SUBSTRATE_JUNCTION_ORGANIZATION	35	1.84767	0.00166945	0.00472537
M5 GO Biological Process	GOBP_CELL_SURFACE_PATTERN_RECOGNITION_RECEPTOR_SIGNALING_PATHWAY	69	1.84653	0	0.00479551
M5 GO Biological Process	GOBP_NATURAL_KILLER_CELL_DIFFERENTIATION	34	1.84585	0	0.00483342
M5 GO Molecular Function	GOMF_DOPAMINE_RECEPTOR_BINDING	26	1.84563	0.0035461	0.00483928
M5 GO Biological Process	GOBP_NEGATIVE_REGULATION_OF_PEPTIDYL_TYROSINE_PHOSPHORYLATION	55	1.8456	0	0.00483349
M5 GO Biological Process	GOBP_POSITIVE_REGULATION_OF_PROTEIN_AUTOPHOSPHORYLATION	26	1.84528	0	0.00484945
M5 GO Biological Process	GOBP_INTERFERON_BETA_PRODUCTION	72	1.84521	0	0.00484531
M2 WikiPathways pathway	WP_IL_3_SIGNALING_PATHWAY	98	1.84453	0	0.00488297
M5 GO Biological Process	GOBP_MYELOID_CELL_DIFFERENTIATION	452	1.8445	0	0.00487546
M5 GO Biological Process	GOBP_IMMUNOLOGICAL_SYNAPSE_FORMATION	15	1.84377	0.00344234	0.00492622
M5 GO Biological Process	GOBP_RESPONSE_TO_TYPE_I_INTERFERON	68	1.8435	0	0.00493526
M2 Reactome pathway	REACTOME_CASPASE_ACTIVATION_VIA_DEATH_RECEPTORS_IN_THE_PRESENCE_OF_LIGAND	15	1.84288	0	0.00497594
M2 Reactome pathway	REACTOME_CASPASE_ACTIVATION_VIA_EXTRINSIC_APOPTOTIC_SIGNALLING_PATHWAY	19	1.84215	0	0.00502964
M2 Reactome pathway	REACTOME_CELL_EXTRACELLULAR_MATRIX_INTERACTIONS	18	1.84202	0	0.00502528
M5 GO Biological Process	GOBP_PROSTAGLANDIN_SECRETION	21	1.84114	0	0.0050754
M5 GO Biological Process	GOBP_INTERFERON_ALPHA_PRODUCTION	35	1.84015	0.00172414	0.00512709
M2 BioCarta pathway	BIOCARTA_FAS_PATHWAY	28	1.84	0	0.0051275
M5 GO Biological Process	GOBP_ER_NUCLEUS_SIGNALING_PATHWAY	41	1.83885	0	0.00516919
M5 GO Biological Process	GOBP_POSITIVE_REGULATION_OF_INTERFERON_ALPHA_PRODUCTION	28	1.83848	0	0.00517616
M5 GO Biological Process	GOBP_TISSUE_REMODELING	202	1.83715	0	0.00525986
M5 GO Biological Process	GOBP_REGULATION_OF_VASOCONSTRICTION	88	1.83685	0.0015361	0.00526665
M5 GO Cellular Component	GOCC_GOLGI_MEDIAL_CISTERNA	23	1.8347	0	0.00541727
M5 GO Biological Process	GOBP_PROTEIN_TRIMERIZATION	16	1.83393	0.00175131	0.00546466
M5 GO Biological Process	GOBP_REGULATION_OF_RECEPTOR_SIGNALING_PATHWAY_VIA_STAT	105	1.83292	0	0.00552811
M2 Reactome pathway	REACTOME_MYD88_INDEPENDENT_TLR4_CASCADE	99	1.83194	0	0.00559944
M5 GO Biological Process	GOBP_CD4_POSITIVE_ALPHA_BETA_T_CELL_PROLIFERATION	27	1.83166	0	0.00561535
M5 GO Biological Process	GOBP_VASOCONSTRICTION	111	1.83157	0	0.00561021
M2 Reactome pathway	REACTOME_SIGNALING_BY_PTK6	48	1.83156	0.00162602	0.00560182
M5 GO Biological Process	GOBP_NEGATIVE_REGULATION_OF_LEUKOCYTE_CELL_CELL_ADHESION	147	1.83033	0	0.00569195
M2 Reactome pathway	REACTOME_KERATAN_SULFATE_KERATIN_METABOLISM	34	1.83029	0	0.00568507
M5 GO Biological Process	GOBP_GLYCOPROTEIN_BIOSYNTHETIC_PROCESS	277	1.83023	0	0.0056831
M5 GO Biological Process	GOBP_REGULATION_OF_LEUKOCYTE_DIFFERENTIATION	344	1.82993	0	0.00570042
M2 Reactome pathway	REACTOME_PD_1_SIGNALING	16	1.82967	0	0.00571278
M2 Reactome pathway	REACTOME_FCERI_MEDIATED_MAPK_ACTIVATION	31	1.82941	0.00172414	0.00572358
M5 GO Biological Process	GOBP_POSITIVE_REGULATION_OF_HEMOPOIESIS	205	1.82933	0	0.00572476
M5 GO Biological Process	GOBP_GLYCEROL_METABOLIC_PROCESS	21	1.82917	0.00173611	0.00572919
M5 GO Biological Process	GOBP_LYMPHOCYTE_HOMEOSTASIS	95	1.82888	0	0.00575275
M5 GO Biological Process	GOBP_POSITIVE_REGULATION_OF_PEPTIDASE_ACTIVITY	182	1.82682	0	0.00591666
M5 GO Biological Process	GOBP_NEGATIVE_REGULATION_OF_VASCULATURE_DEVELOPMENT	110	1.8265	0	0.00592399
M5 GO Molecular Function	GOMF_PHOSPHATIDYLINOSITOL_3_KINASE_BINDING	42	1.82588	0.00162075	0.00594231
M5 GO Molecular Function	GOMF_PEPTIDE_ANTIGEN_BINDING	33	1.82421	0	0.00606364
M5 GO Biological Process	GOBP_POSITIVE_REGULATION_OF_KINASE_ACTIVITY	404	1.82356	0	0.00609293
M5 GO Molecular Function	GOMF_MONOSACCHARIDE_BINDING	92	1.82304	0	0.00612188
M2 WikiPathways pathway	WP_APOPTOSIS	78	1.82286	0	0.00613033
M5 GO Biological Process	GOBP_PHOSPHATIDYLINOSITOL_3_KINASE_PROTEIN_KINASE_B_SIGNAL_TRANSDUCTION	298	1.82239	0	0.00616084
M5 GO Biological Process	GOBP_REGULATION_OF_FIBROBLAST_MIGRATION	51	1.82193	0	0.00617864
M5 GO Biological Process	GOBP_CELLULAR_RESPONSE_TO_VASCULAR_ENDOTHELIAL_GROWTH_FACTOR_STIMULUS	60	1.82166	0	0.00618388
M5 GO Biological Process	GOBP_RESPONSE_TO_AMYLOID_BETA	39	1.82117	0	0.00621581
M5 GO Molecular Function	GOMF_CYSTEINE_TYPE_ENDOPEPTIDASE_ACTIVITY	71	1.82116	0	0.0062068
M5 GO Biological Process	GOBP_LYMPH_VESSEL_DEVELOPMENT	32	1.82104	0.00165289	0.00621039
M5 GO Biological Process	GOBP_B_CELL_HOMEOSTASIS	44	1.82036	0	0.00628273
M5 GO Biological Process	GOBP_REGULATION_OF_MAP_KINASE_ACTIVITY	193	1.82026	0	0.00628302
M5 GO Cellular Component	GOCC_INTEGRIN_COMPLEX	33	1.82016	0	0.00628645
M5 GO Biological Process	GOBP_REGULATION_OF_RESPONSE_TO_WOUNDING	169	1.81974	0	0.00632099
M5 GO Biological Process	GOBP_RESPONSE_TO_ENDOPLASMIC_RETICULUM_STRESS	260	1.81904	0	0.00635549
M5 GO Biological Process	GOBP_NECROPTOTIC_PROCESS	38	1.8185	0	0.00640546
M5 GO Molecular Function	GOMF_PROTEIN_TYROSINE_KINASE_BINDING	125	1.81816	0	0.00641805
M5 GO Biological Process	GOBP_NEGATIVE_REGULATION_OF_CELL_MIGRATION_INVOLVED_IN_SPROUTING_ANGIOGENESIS	16	1.81793	0.00181488	0.00643361
MH Hallmark	HALLMARK_APICAL_JUNCTION	198	1.81764	0	0.0064445
M5 GO Biological Process	GOBP_REGULATION_OF_LYSOSOMAL_LUMEN_PH	22	1.8169	0	0.0064925
M5 GO Biological Process	GOBP_SMALL_GTPASE_MEDIATED_SIGNAL_TRANSDUCTION	422	1.81623	0	0.00652181
M5 GO Cellular Component	GOCC_GOLGI_ASSOCIATED_VESICLE_MEMBRANE	45	1.81599	0.00167504	0.00652951
M5 GO Biological Process	GOBP_APOPTOTIC_CELL_CLEARANCE	42	1.8154	0	0.00656471
M5 GO Biological Process	GOBP_ACUTE_INFLAMMATORY_RESPONSE_TO_ANTIGENIC_STIMULUS	43	1.81489	0.00308642	0.00661078
M5 GO Biological Process	GOBP_PHAGOCYTOSIS_RECOGNITION	25	1.81341	0	0.00673641
M5 GO Biological Process	GOBP_REGULATION_OF_CD8_POSITIVE_ALPHA_BETA_T_CELL_ACTIVATION	33	1.81332	0	0.00673455
M5 GO Biological Process	GOBP_FC_RECEPTOR_SIGNALING_PATHWAY	19	1.81304	0	0.00674188
M2 WikiPathways pathway	WP_EGFR1_SIGNALING_PATHWAY	174	1.81298	0	0.00674001
M5 GO Biological Process	GOBP_MODULATION_OF_PROCESS_OF_ANOTHER_ORGANISM	19	1.81241	0	0.00678078
M5 GO Biological Process	GOBP_NEGATIVE_REGULATION_OF_EXOCYTOSIS	36	1.81218	0.00171821	0.00678951
M2 Reactome pathway	REACTOME_KERATAN_SULFATE_BIOSYNTHESIS	27	1.81203	0.00171821	0.00679222
M5 GO Biological Process	GOBP_GOLGI_VESICLE_TRANSPORT	277	1.81135	0	0.00682825
M5 GO Biological Process	GOBP_ENDOPLASMIC_RETICULUM_UNFOLDED_PROTEIN_RESPONSE	68	1.81088	0.00160772	0.0068717
M5 GO Biological Process	GOBP_RESPONSE_TO_DSRNA	46	1.81061	0.00158983	0.00688185
M5 GO Biological Process	GOBP_ALDITOL_METABOLIC_PROCESS	25	1.81045	0.00170068	0.00688131
M5 GO Biological Process	GOBP_TYROSINE_PHOSPHORYLATION_OF_STAT_PROTEIN	71	1.81005	0	0.00690336
M5 GO Biological Process	GOBP_POSITIVE_REGULATION_OF_PHOSPHATIDYLINOSITOL_3_KINASE_PROTEIN_KINASE_B_SIGNAL_TRANSDUCTION	176	1.80974	0	0.00692397
M5 GO Biological Process	GOBP_RECEPTOR_INTERNALIZATION	148	1.80958	0	0.00692943
M5 GO Biological Process	GOBP_REGULATION_OF_MYELOID_CELL_DIFFERENTIATION	221	1.80848	0	0.00699954
M5 GO Biological Process	GOBP_PEPTIDYL_TYROSINE_AUTOPHOSPHORYLATION	26	1.80766	0	0.00705284
M5 GO Molecular Function	GOMF_CYTOKINE_ACTIVITY	195	1.80667	0	0.00713019
M5 GO Biological Process	GOBP_POSITIVE_REGULATION_OF_FATTY_ACID_BIOSYNTHETIC_PROCESS	27	1.80664	0	0.00712331
M5 GO Biological Process	GOBP_GAP_JUNCTION_ASSEMBLY	17	1.80614	0.0035524	0.00714937
M5 GO Molecular Function	GOMF_ENDOPEPTIDASE_REGULATOR_ACTIVITY	181	1.80493	0	0.00724411
M5 GO Biological Process	GOBP_REGULATION_OF_LAMELLIPODIUM_ORGANIZATION	51	1.80406	0.00326797	0.0073221
M5 GO Biological Process	GOBP_NEGATIVE_REGULATION_OF_ERK1_AND_ERK2_CASCADE	82	1.80406	0	0.00731203
M5 GO Molecular Function	GOMF_CARGO_RECEPTOR_ACTIVITY	82	1.80368	0	0.0073288
M5 GO Biological Process	GOBP_CELLULAR_RESPONSE_TO_LIPOPROTEIN_PARTICLE_STIMULUS	38	1.80324	0.00155521	0.00736778
M5 GO Biological Process	GOBP_CALCIUM_MEDIATED_SIGNALING	200	1.80281	0	0.00741117
M5 GO Molecular Function	GOMF_PEPTIDASE_ACTIVATOR_ACTIVITY_INVOLVED_IN_APOPTOTIC_PROCESS	19	1.80259	0	0.00741138
M5 GO Molecular Function	GOMF_ANTIGEN_BINDING	57	1.80221	0.00165017	0.00743971
M2 BioCarta pathway	BIOCARTA_IL1R_PATHWAY	29	1.80191	0.00158228	0.00744429
M2 Reactome pathway	REACTOME_RAC2_GTPASE_CYCLE	84	1.80169	0	0.00744893
M5 GO Biological Process	GOBP_NEGATIVE_REGULATION_OF_VIRAL_GENOME_REPLICATION	53	1.80133	0.00160514	0.00747124
M5 GO Biological Process	GOBP_CARBOHYDRATE_DERIVATIVE_CATABOLIC_PROCESS	158	1.79946	0	0.00763347
M5 GO Biological Process	GOBP_PROTEIN_AUTOPHOSPHORYLATION	237	1.79914	0	0.0076437
M5 GO Molecular Function	GOMF_PHOSPHATIDYLINOSITOL_BISPHOSPHATE_BINDING	118	1.79882	0	0.00765673
M5 GO Biological Process	GOBP_VASCULOGENESIS	96	1.79867	0	0.00766538
M2 WikiPathways pathway	WP_INTEGRIN_MEDIATED_CELL_ADHESION	100	1.79811	0	0.0077048
M5 GO Cellular Component	GOCC_EXTRACELLULAR_EXOSOME	89	1.79782	0	0.00771627
M5 GO Biological Process	GOBP_POSITIVE_REGULATION_OF_DEFENSE_RESPONSE_TO_VIRUS_BY_HOST	32	1.79724	0.00164204	0.00775687
M5 GO Cellular Component	GOCC_CELL_SUBSTRATE_JUNCTION	184	1.79662	0	0.00780903
M5 GO Biological Process	GOBP_NEGATIVE_REGULATION_OF_INFLAMMASOME_MEDIATED_SIGNALING_PATHWAY	15	1.79652	0.00512821	0.0078116
M5 GO Biological Process	GOBP_TRANSITION_METAL_ION_TRANSPORT	99	1.79649	0	0.00780257
M5 GO Biological Process	GOBP_REGULATION_OF_PROTEIN_SERINE_THREONINE_KINASE_ACTIVITY	333	1.79572	0	0.00784733
M2 Reactome pathway	REACTOME_INTERLEUKIN_3_INTERLEUKIN_5_AND_GM_CSF_SIGNALING	38	1.79521	0.00324675	0.00789187
M5 GO Biological Process	GOBP_REGULATION_OF_VIRAL_INDUCED_CYTOPLASMIC_PATTERN_RECOGNITION_RECEPTOR_SIGNALING_PATHWAY	87	1.79387	0	0.00803451
M5 GO Biological Process	GOBP_B_CELL_RECEPTOR_SIGNALING_PATHWAY	53	1.79331	0	0.00807294
M5 GO Biological Process	GOBP_TRANSPORT_OF_VIRUS	15	1.79214	0.00181488	0.00817469
M5 GO Biological Process	GOBP_MONONUCLEAR_CELL_DIFFERENTIATION	487	1.792	0	0.00817534
M5 GO Biological Process	GOBP_CELLULAR_RESPONSE_TO_HYDROGEN_PEROXIDE	61	1.79195	0	0.00816877
MH Hallmark	HALLMARK_APOPTOSIS	160	1.79099	0	0.00824999
M5 GO Biological Process	GOBP_REGULATION_OF_VASCULAR_ENDOTHELIAL_GROWTH_FACTOR_RECEPTOR_SIGNALING_PATHWAY	33	1.79065	0.00516351	0.00827207
M5 GO Biological Process	GOBP_REGULATION_OF_VASCULOGENESIS	16	1.78955	0.00866551	0.00836295
M5 GO Biological Process	GOBP_POSITIVE_REGULATION_OF_CD8_POSITIVE_ALPHA_BETA_T_CELL_ACTIVATION	22	1.7895	0.00342466	0.00835479
M5 GO Biological Process	GOBP_BIOLOGICAL_PROCESS_INVOLVED_IN_SYMBIOTIC_INTERACTION	248	1.78936	0	0.00835368
M5 GO Biological Process	GOBP_NEGATIVE_REGULATION_OF_OSTEOCLAST_DIFFERENTIATION	37	1.78928	0	0.00834552
M5 GO Cellular Component	GOCC_EXTRINSIC_COMPONENT_OF_CYTOPLASMIC_SIDE_OF_PLASMA_MEMBRANE	72	1.78908	0	0.00834445
M2 WikiPathways pathway	WP_ALPHA_6_BETA_4_INTEGRIN_SIGNALING_PATHWAY	65	1.78901	0	0.00834344
M5 GO Biological Process	GOBP_CD4_POSITIVE_ALPHA_BETA_T_CELL_ACTIVATION	127	1.78851	0	0.00837941
M5 GO Biological Process	GOBP_REGULATION_OF_PHOSPHOLIPASE_ACTIVITY	59	1.78847	0	0.00837555
M5 GO Biological Process	GOBP_REGULATION_OF_B_CELL_MEDIATED_IMMUNITY	79	1.78826	0	0.00838027
M5 GO Biological Process	GOBP_LAMELLIPODIUM_ASSEMBLY	73	1.78821	0	0.00837215
M5 GO Biological Process	GOBP_REGULATION_OF_LIPOPOLYSACCHARIDE_MEDIATED_SIGNALING_PATHWAY	27	1.78761	0.00515464	0.00843887
MH Hallmark	HALLMARK_UV_RESPONSE_DN	144	1.78755	0	0.0084349
M5 GO Molecular Function	GOMF_NUCLEOTIDE_RECEPTOR_ACTIVITY	18	1.78587	0.00506757	0.00856377
M5 GO Biological Process	GOBP_RESPONSE_TO_YEAST	16	1.78504	0.0052356	0.00862879
M5 GO Molecular Function	GOMF_LIPOPOLYSACCHARIDE_BINDING	35	1.78428	0.00170648	0.00870346
M5 GO Biological Process	GOBP_NEGATIVE_REGULATION_OF_NATURAL_KILLER_CELL_MEDIATED_IMMUNITY	35	1.78417	0.00166389	0.00870198
M5 GO Molecular Function	GOMF_LAMININ_BINDING	31	1.78408	0.00174216	0.00870052
M2 Reactome pathway	REACTOME_NEGATIVE_REGULATION_OF_THE_PI3K_AKT_NETWORK	106	1.78393	0	0.00870889
M5 GO Molecular Function	GOMF_PHOSPHOLIPASE_ACTIVATOR_ACTIVITY	15	1.78372	0.00340715	0.00871722
M2 BioCarta pathway	BIOCARTA_NFKB_PATHWAY	21	1.78362	0.00347222	0.00871578
M5 GO Biological Process	GOBP_REGULATION_OF_REACTIVE_OXYGEN_SPECIES_METABOLIC_PROCESS	165	1.78348	0	0.00871432
M5 GO Biological Process	GOBP_NEGATIVE_REGULATION_OF_RESPONSE_TO_EXTERNAL_STIMULUS	438	1.78324	0	0.00871846
M5 GO Biological Process	GOBP_BLOOD_VESSEL_ENDOTHELIAL_CELL_PROLIFERATION_INVOLVED_IN_SPROUTING_ANGIOGENESIS	23	1.78312	0.00169492	0.00872117
M5 GO Biological Process	GOBP_CELL_CELL_ADHESION_MEDIATED_BY_INTEGRIN	18	1.78285	0.0017301	0.00873216
M5 GO Biological Process	GOBP_REGULATION_OF_ACTIVATED_T_CELL_PROLIFERATION	43	1.78184	0.00347222	0.008821
M2 WikiPathways pathway	WP_FAS_PATHWAY_AND_STRESS_INDUCTION_OF_HSP_REGULATION	36	1.78071	0.00165017	0.008911
M5 GO Biological Process	GOBP_REGULATION_OF_ACUTE_INFLAMMATORY_RESPONSE_TO_ANTIGENIC_STIMULUS	33	1.78036	0	0.00894811
M2 Reactome pathway	REACTOME_TRANS_GOLGI_NETWORK_VESICLE_BUDDING	70	1.7803	0	0.00894224
M5 GO Molecular Function	GOMF_INSULIN_RECEPTOR_BINDING	25	1.78009	0.00168919	0.00894464
M5 GO Molecular Function	GOMF_EXTRACELLULAR_MATRIX_STRUCTURAL_CONSTITUENT_CONFERRING_TENSILE_STRENGTH	44	1.77897	0	0.00904789
M5 GO Biological Process	GOBP_REGULATION_OF_PHOSPHATIDYLINOSITOL_3_KINASE_PROTEIN_KINASE_B_SIGNAL_TRANSDUCTION	248	1.77759	0	0.00917427
M2 Reactome pathway	REACTOME_RAC3_GTPASE_CYCLE	90	1.77672	0	0.00926041
M5 GO Biological Process	GOBP_CD8_POSITIVE_ALPHA_BETA_T_CELL_ACTIVATION	46	1.77665	0.00320513	0.00925417
M5 GO Biological Process	GOBP_POSITIVE_REGULATION_OF_PATTERN_RECOGNITION_RECEPTOR_SIGNALING_PATHWAY	66	1.77642	0.00160256	0.00926301
M5 GO Biological Process	GOBP_POSITIVE_REGULATION_OF_SMOOTH_MUSCLE_CELL_PROLIFERATION	115	1.77545	0	0.00933357
M2 Reactome pathway	REACTOME_ACTIVATION_OF_MATRIX_METALLOPROTEINASES	29	1.77536	0.00171527	0.00933406
M5 GO Biological Process	GOBP_POSITIVE_REGULATION_OF_ENDOTHELIAL_CELL_MIGRATION	109	1.77526	0.00149031	0.00933458
M5 GO Molecular Function	GOMF_DEAMINASE_ACTIVITY	27	1.7752	0.00338983	0.00932684
M5 GO Biological Process	GOBP_REGULATION_OF_EXTRACELLULAR_MATRIX_ORGANIZATION	62	1.77461	0.00157978	0.00937513
M5 GO Biological Process	GOBP_POSITIVE_REGULATION_OF_AMYLOID_PRECURSOR_PROTEIN_CATABOLIC_PROCESS	26	1.77437	0.00170358	0.00939195
M5 GO Biological Process	GOBP_EPIDERMAL_GROWTH_FACTOR_RECEPTOR_SIGNALING_PATHWAY	104	1.77427	0	0.00938563
M5 GO Molecular Function	GOMF_PHOSPHOPROTEIN_BINDING	112	1.77425	0	0.00937654
M5 GO Biological Process	GOBP_VACUOLE_ORGANIZATION	219	1.77422	0	0.00936478
M5 GO Cellular Component	GOCC_RUFFLE	155	1.77361	0	0.00941942
M5 GO Biological Process	GOBP_REGULATION_OF_ENDOPEPTIDASE_ACTIVITY	341	1.77359	0	0.00940901
M5 GO Biological Process	GOBP_RESPONSE_TO_MURAMYL_DIPEPTIDE	21	1.77324	0.003367	0.00944454
M2 Reactome pathway	REACTOME_GPER1_SIGNALING	27	1.77305	0.00340715	0.00945437
M5 GO Biological Process	GOBP_POSITIVE_REGULATION_OF_SMOOTH_MUSCLE_CELL_MIGRATION	67	1.77285	0.00308166	0.00945889
M5 GO Biological Process	GOBP_CELLULAR_SENESCENCE	87	1.77242	0	0.00948895
M5 GO Biological Process	GOBP_POSITIVE_REGULATION_OF_VASOCONSTRICTION	53	1.77241	0	0.00947714
M5 GO Biological Process	GOBP_REGULATION_OF_MONOOXYGENASE_ACTIVITY	45	1.77022	0	0.00971562
M2 BioCarta pathway	BIOCARTA_NO2IL12_PATHWAY	15	1.76995	0.00508475	0.00973172
M2 Reactome pathway	REACTOME_CELL_CELL_COMMUNICATION	95	1.76953	0	0.00976007
M5 GO Biological Process	GOBP_CELLULAR_RESPONSE_TO_PEPTIDE	333	1.7695	0	0.00975201
M5 GO Biological Process	GOBP_ENDOTHELIAL_CELL_APOPTOTIC_PROCESS	62	1.7693	0	0.00975468
M2 Reactome pathway	REACTOME_CYTOSOLIC_SENSORS_OF_PATHOGEN_ASSOCIATED_DNA	31	1.76882	0.00336134	0.00980409
M2 Reactome pathway	REACTOME_G_PROTEIN_BETA_GAMMA_SIGNALLING	31	1.76878	0.00332779	0.009792
M5 GO Biological Process	GOBP_AMINOGLYCAN_METABOLIC_PROCESS	112	1.76769	0	0.00990399
M5 GO Molecular Function	GOMF_CHEMOKINE_BINDING	33	1.76748	0.00339559	0.00990901
M5 GO Biological Process	GOBP_VASODILATION	63	1.76722	0.00162866	0.0099301
M5 GO Biological Process	GOBP_LIPID_EXPORT_FROM_CELL	56	1.76711	0	0.00992984
M5 GO Molecular Function	GOMF_LIPASE_ACTIVATOR_ACTIVITY	19	1.76588	0.00711744	0.0100519
M5 GO Biological Process	GOBP_ANTIGEN_RECEPTOR_MEDIATED_SIGNALING_PATHWAY	177	1.76551	0	0.0100927
M5 GO Biological Process	GOBP_ANTIVIRAL_INNATE_IMMUNE_RESPONSE	51	1.76526	0.00326264	0.0101175
M5 GO Biological Process	GOBP_PODOSOME_ASSEMBLY	23	1.76511	0	0.010121
M5 GO Biological Process	GOBP_RESPONSE_TO_HYDROGEN_PEROXIDE	91	1.76509	0	0.0101113
M5 GO Biological Process	GOBP_REGULATION_OF_WOUND_HEALING	124	1.76438	0	0.0101728
M5 GO Biological Process	GOBP_SECOND_MESSENGER_MEDIATED_SIGNALING	304	1.76434	0	0.0101617
M2 Reactome pathway	REACTOME_PLATELET_SENSITIZATION_BY_LDL	17	1.76272	0.00353357	0.010336
M5 GO Biological Process	GOBP_GOLGI_ORGANIZATION	135	1.76253	0	0.010351
M2 Reactome pathway	REACTOME_NICOTINAMIDE_SALVAGING	18	1.76241	0.00167504	0.0103516
M5 GO Biological Process	GOBP_POSITIVE_REGULATION_OF_B_CELL_DIFFERENTIATION	19	1.76219	0.00875657	0.0103691
M5 GO Biological Process	GOBP_LYTIC_VACUOLE_ORGANIZATION	99	1.76181	0	0.0104024
M5 GO Molecular Function	GOMF_NUCLEOSIDE_TRIPHOSPHATASE_REGULATOR_ACTIVITY	426	1.76156	0	0.0104134
M2 Reactome pathway	REACTOME_GLYCOSAMINOGLYCAN_METABOLISM	120	1.76106	0	0.010461
M2 Reactome pathway	REACTOME_PHOSPHORYLATION_OF_CD3_AND_TCR_ZETA_CHAINS	15	1.76103	0	0.010451
M5 GO Cellular Component	GOCC_ER_TO_GOLGI_TRANSPORT_VESICLE_MEMBRANE	23	1.76074	0.0017452	0.0104788
M5 GO Biological Process	GOBP_POSITIVE_REGULATION_OF_LEUKOCYTE_DEGRANULATION	32	1.76068	0.00167504	0.0104728
M5 GO Biological Process	GOBP_VESICLE_BUDDING_FROM_MEMBRANE	76	1.76013	0	0.010542
M5 GO Molecular Function	GOMF_TRANSMEMBRANE_RECEPTOR_PROTEIN_TYROSINE_KINASE_ACTIVATOR_ACTIVITY	16	1.75954	0.0034904	0.0106099
M5 GO Biological Process	GOBP_CELLULAR_RESPONSE_TO_CHEMICAL_STRESS	295	1.75897	0	0.0106492
M5 GO Molecular Function	GOMF_TUMOR_NECROSIS_FACTOR_RECEPTOR_BINDING	32	1.75872	0.00164204	0.0106701
M5 GO Molecular Function	GOMF_MHC_CLASS_I_PROTEIN_BINDING	32	1.75819	0.00671141	0.0107336
M2 Reactome pathway	REACTOME_RHO_GTPASES_ACTIVATE_NADPH_OXIDASES	23	1.75807	0.00170648	0.0107349
M5 GO Biological Process	GOBP_REGULATION_OF_MEMBRANE_PROTEIN_ECTODOMAIN_PROTEOLYSIS	23	1.758	0.00164474	0.0107351
M5 GO Biological Process	GOBP_LYMPH_VESSEL_MORPHOGENESIS	24	1.75743	0.00171821	0.0107753
M5 GO Cellular Component	GOCC_COPI_COATED_VESICLE_MEMBRANE	17	1.75725	0.00175439	0.0107754
M5 GO Molecular Function	GOMF_OXIDOREDUCTASE_ACTIVITY_ACTING_ON_THE_CH_NH2_GROUP_OF_DONORS	21	1.75708	0.00338409	0.0107871
M5 GO Biological Process	GOBP_ICOSANOID_SECRETION	51	1.75704	0.0015949	0.0107794
M5 GO Biological Process	GOBP_VASCULAR_ENDOTHELIAL_GROWTH_FACTOR_SIGNALING_PATHWAY	42	1.75661	0	0.0108282
M2 Reactome pathway	REACTOME_GLYCOSPHINGOLIPID_CATABOLISM	31	1.75632	0.00507614	0.01085
M5 GO Biological Process	GOBP_LYMPHOCYTE_APOPTOTIC_PROCESS	97	1.75579	0	0.0109052
M5 GO Biological Process	GOBP_T_HELPER_17_TYPE_IMMUNE_RESPONSE	46	1.75481	0	0.0110073
M5 GO Biological Process	GOBP_POSITIVE_REGULATION_OF_LYMPHOCYTE_CHEMOTAXIS	17	1.75449	0.00650406	0.0110263
M5 GO Biological Process	GOBP_CELLULAR_DEFENSE_RESPONSE	15	1.75446	0.00694444	0.0110158
M5 GO Biological Process	GOBP_T_CELL_RECEPTOR_SIGNALING_PATHWAY	138	1.75441	0	0.0110118
M5 GO Biological Process	GOBP_LEUKOCYTE_MIGRATION_INVOLVED_IN_INFLAMMATORY_RESPONSE	26	1.75334	0.0034188	0.0111298
M5 GO Biological Process	GOBP_POSITIVE_REGULATION_OF_GTPASE_ACTIVITY	246	1.75214	0	0.0112618
M2 Reactome pathway	REACTOME_EGFR_DOWNREGULATION	31	1.75186	0.00335008	0.0112752
M5 GO Molecular Function	GOMF_CATALYTIC_ACTIVITY_ACTING_ON_A_GLYCOPROTEIN	22	1.75139	0.00327869	0.0113091
M5 GO Biological Process	GOBP_VIRAL_PROCESS	315	1.7475	0	0.0118569
M5 GO Molecular Function	GOMF_BILE_ACID_TRANSMEMBRANE_TRANSPORTER_ACTIVITY	20	1.74739	0.00332779	0.0118595
M5 GO Molecular Function	GOMF_I_SMAD_BINDING	16	1.74707	0.00350263	0.0118888
M2 Reactome pathway	REACTOME_INTEGRIN_SIGNALING	27	1.7451	0.00344234	0.012187
M5 GO Molecular Function	GOMF_ACETYLGALACTOSAMINYLTRANSFERASE_ACTIVITY	33	1.74426	0.00327869	0.0122762
M5 GO Biological Process	GOBP_SYNCYTIUM_FORMATION	67	1.74416	0.00152672	0.0122771
M2 BioCarta pathway	BIOCARTA_MAPK_PATHWAY	76	1.7439	0	0.0123044
M5 GO Biological Process	GOBP_REGULATION_OF_HEMOPOIESIS	430	1.74288	0	0.0124359
M5 GO Biological Process	GOBP_POSITIVE_REGULATION_OF_VASCULAR_PERMEABILITY	20	1.74249	0.00499168	0.012493
M5 GO Molecular Function	GOMF_C_C_CHEMOKINE_BINDING	25	1.74248	0.00657895	0.0124798
M5 GO Biological Process	GOBP_TRANSCYTOSIS	21	1.74247	0	0.0124666
M5 GO Biological Process	GOBP_NEGATIVE_REGULATION_OF_REGULATED_SECRETORY_PATHWAY	24	1.74241	0.00673401	0.0124598
M5 GO Molecular Function	GOMF_GTPASE_ACTIVITY	293	1.74238	0	0.0124504
M5 GO Biological Process	GOBP_POSITIVE_REGULATION_OF_GLIAL_CELL_PROLIFERATION	29	1.7422	0.00332226	0.012466
M5 GO Cellular Component	GOCC_LYSOSOMAL_LUMEN	20	1.74171	0.00180832	0.0125202
M5 GO Biological Process	GOBP_NUCLEOTIDE_SUGAR_METABOLIC_PROCESS	34	1.74061	0	0.0126641
M2 Reactome pathway	REACTOME_NCAM_SIGNALING_FOR_NEURITE_OUT_GROWTH	35	1.73992	0.00168634	0.0127378
M5 GO Biological Process	GOBP_REGULATION_OF_RESPONSE_TO_TYPE_II_INTERFERON	15	1.73896	0.0053286	0.0128598
M5 GO Molecular Function	GOMF_PHOSPHATIDYLINOSITOL_3_5_BISPHOSPHATE_BINDING	30	1.73882	0.00525394	0.0128736
M5 GO Biological Process	GOBP_CELLULAR_RESPONSE_TO_ACID_CHEMICAL	87	1.73837	0	0.0129073
M5 GO Biological Process	GOBP_NUCLEOTIDE_SUGAR_BIOSYNTHETIC_PROCESS	17	1.73789	0.00668896	0.0129582
M5 GO Biological Process	GOBP_RESPONSE_TO_EPIDERMAL_GROWTH_FACTOR	41	1.73775	0	0.0129669
M5 GO Biological Process	GOBP_POSITIVE_REGULATION_OF_DEFENSE_RESPONSE_TO_BACTERIUM	15	1.73762	0.00680272	0.0129669
M5 GO Biological Process	GOBP_REGULATION_OF_TISSUE_REMODELING	83	1.73757	0	0.0129656
M2 WikiPathways pathway	WP_ALZHEIMER_39_S_DISEASE	74	1.7373	0.0015748	0.0129866
M5 GO Biological Process	GOBP_NEGATIVE_REGULATION_OF_TYPE_I_INTERFERON_PRODUCTION	44	1.73626	0.00168919	0.0131184
M5 GO Molecular Function	GOMF_MITOGEN_ACTIVATED_PROTEIN_KINASE_BINDING	32	1.73605	0.0017094	0.0131256
M5 GO Biological Process	GOBP_REGULATION_OF_HEPATOCYTE_PROLIFERATION	25	1.73537	0.00334448	0.0132188
M5 GO Cellular Component	GOCC_ENDOPLASMIC_RETICULUM_GOLGI_INTERMEDIATE_COMPARTMENT	77	1.7348	0	0.0132823
M5 GO Biological Process	GOBP_REGULATION_OF_PEPTIDASE_ACTIVITY	416	1.73404	0	0.0133813
M5 GO Biological Process	GOBP_NEGATIVE_REGULATION_OF_INTERLEUKIN_17_PRODUCTION	19	1.73373	0.0104895	0.013398
M5 GO Molecular Function	GOMF_PHOSPHOLIPID_BINDING	480	1.73285	0	0.0134991
M2 BioCarta pathway	BIOCARTA_CDMAC_PATHWAY	15	1.73221	0	0.0135962
M5 GO Biological Process	GOBP_NEGATIVE_REGULATION_OF_MONONUCLEAR_CELL_MIGRATION	19	1.73205	0.0051458	0.0136028
M5 GO Biological Process	GOBP_POSITIVE_REGULATION_OF_CYSTEINE_TYPE_ENDOPEPTIDASE_ACTIVITY	146	1.73153	0	0.0136693
M5 GO Cellular Component	GOCC_HIGH_DENSITY_LIPOPROTEIN_PARTICLE	34	1.73129	0.00332226	0.0136928
M2 Reactome pathway	REACTOME_CDC42_GTPASE_CYCLE	93	1.72932	0	0.0139289
M5 GO Biological Process	GOBP_NEGATIVE_REGULATION_OF_VIRAL_INDUCED_CYTOPLASMIC_PATTERN_RECOGNITION_RECEPTOR_SIGNALING_PATHWAY	35	1.72785	0.003367	0.0141622
M5 GO Biological Process	GOBP_TRANSFORMING_GROWTH_FACTOR_BETA_PRODUCTION	42	1.72763	0.00315457	0.0141814
M5 GO Biological Process	GOBP_POSITIVE_REGULATION_OF_PROTEIN_CONTAINING_COMPLEX_ASSEMBLY	206	1.72734	0	0.0142092
M5 GO Biological Process	GOBP_POSITIVE_REGULATION_OF_ACUTE_INFLAMMATORY_RESPONSE_TO_ANTIGENIC_STIMULUS	24	1.72698	0.00519931	0.014255
M2 Reactome pathway	REACTOME_GAB1_SIGNALOSOME	17	1.72645	0.00673401	0.0143213
M5 GO Biological Process	GOBP_LIPID_LOCALIZATION	483	1.72487	0	0.0145494
M5 GO Biological Process	GOBP_INTEGRATED_STRESS_RESPONSE_SIGNALING	21	1.72392	0.0118846	0.0146972
M5 GO Cellular Component	GOCC_PEPTIDASE_INHIBITOR_COMPLEX	23	1.72376	0.0034188	0.0147099
M5 GO Biological Process	GOBP_TOLL_LIKE_RECEPTOR_2_SIGNALING_PATHWAY	17	1.72365	0.0103627	0.014708
M5 GO Biological Process	GOBP_EOSINOPHIL_MIGRATION	24	1.72347	0.003367	0.0147157
M2 WikiPathways pathway	WP_TGF_BETA_SIGNALING_PATHWAY	52	1.72342	0.00326264	0.014703
M2 Reactome pathway	REACTOME_PLATELET_HOMEOSTASIS	74	1.72309	0.00158983	0.0147383
M5 GO Biological Process	GOBP_POSITIVE_REGULATION_OF_MONOCYTE_CHEMOTACTIC_PROTEIN_1_PRODUCTION	20	1.72264	0.00847458	0.0148
M5 GO Biological Process	GOBP_REGULATION_OF_SMALL_GTPASE_MEDIATED_SIGNAL_TRANSDUCTION	228	1.72212	0	0.0148566
M5 GO Biological Process	GOBP_NATURAL_KILLER_CELL_PROLIFERATION	29	1.72211	0	0.0148415
M5 GO Biological Process	GOBP_ARP2_3_COMPLEX_MEDIATED_ACTIN_NUCLEATION	41	1.72143	0.00335008	0.0149338
M2 Reactome pathway	REACTOME_GOLGI_ASSOCIATED_VESICLE_BIOGENESIS	54	1.72104	0.00316456	0.0149866
M5 GO Biological Process	GOBP_REGULATION_OF_VASCULAR_PERMEABILITY	47	1.72082	0	0.0149988
M2 Reactome pathway	REACTOME_SIGNALING_BY_HIPPO	20	1.72076	0.005291	0.0149895
M5 GO Biological Process	GOBP_POSITIVE_REGULATION_OF_RECEPTOR_SIGNALING_PATHWAY_VIA_STAT	54	1.72058	0.00325733	0.0149932
M5 GO Biological Process	GOBP_PROTEIN_AUTOPROCESSING	26	1.71986	0.0033557	0.0151075
M5 GO Biological Process	GOBP_CELL_SUBSTRATE_JUNCTION_ORGANIZATION	105	1.71968	0	0.0151183
M2 Reactome pathway	REACTOME_ACTIVATION_OF_IRF3_IRF7_MEDIATED_BY_TBK1_IKBKE	17	1.71906	0.00517241	0.0152275
M2 WikiPathways pathway	WP_IL_9_SIGNALING_PATHWAY	23	1.719	0.00695652	0.0152168
M5 GO Biological Process	GOBP_POSITIVE_REGULATION_OF_LIPID_KINASE_ACTIVITY	21	1.71869	0.00880282	0.015258
M5 GO Molecular Function	GOMF_ATPASE_COUPLED_INTRAMEMBRANE_LIPID_TRANSPORTER_ACTIVITY	28	1.71838	0.00848896	0.0152886
M5 GO Molecular Function	GOMF_GLYCOSAMINOGLYCAN_BINDING	225	1.71835	0	0.0152779
M2 Reactome pathway	REACTOME_MAPK_TARGETS_NUCLEAR_EVENTS_MEDIATED_BY_MAP_KINASES	28	1.71619	0	0.0156051
M5 GO Biological Process	GOBP_REGULATION_OF_CYSTEINE_TYPE_ENDOPEPTIDASE_ACTIVITY	232	1.71554	0	0.0156942
M5 GO Biological Process	GOBP_POSITIVE_REGULATION_OF_NATURAL_KILLER_CELL_MEDIATED_IMMUNITY	48	1.71544	0.00162866	0.0157007
M5 GO Biological Process	GOBP_CELLULAR_RESPONSE_TO_OXIDATIVE_STRESS	237	1.71495	0	0.0157764
M5 GO Molecular Function	GOMF_GTPASE_ACTIVATOR_ACTIVITY	237	1.71482	0	0.0157781
M5 GO Molecular Function	GOMF_SH2_DOMAIN_BINDING	45	1.71394	0	0.0159277
M5 GO Biological Process	GOBP_NEGATIVE_REGULATION_OF_BONE_MINERALIZATION	17	1.71382	0.00505902	0.0159257
M5 GO Biological Process	GOBP_NEUTROPHIL_HOMEOSTASIS	32	1.71373	0.00319489	0.0159178
M5 GO Biological Process	GOBP_POSITIVE_REGULATION_OF_MACROAUTOPHAGY	77	1.7135	0.00155521	0.0159381
M2 WikiPathways pathway	WP_GPCRS_NON_ODORANT	244	1.71302	0	0.0160202
M5 GO Biological Process	GOBP_REGULATION_OF_PROTEIN_TYROSINE_KINASE_ACTIVITY	70	1.71298	0	0.01601
M5 GO Cellular Component	GOCC_RETROMER_COMPLEX	20	1.71093	0.0122378	0.0163515
M5 GO Biological Process	GOBP_INTEGRIN_ACTIVATION	27	1.71055	0.00513699	0.016399
M5 GO Biological Process	GOBP_REGULATION_OF_CD4_POSITIVE_ALPHA_BETA_T_CELL_DIFFERENTIATION	53	1.71015	0.00319489	0.016457
M5 GO Biological Process	GOBP_POSITIVE_REGULATION_OF_B_CELL_MEDIATED_IMMUNITY	61	1.70996	0.00163399	0.0164697
M5 GO Biological Process	GOBP_REGULATION_OF_MACROPHAGE_DERIVED_FOAM_CELL_DIFFERENTIATION	25	1.7092	0.00520833	0.0165911
M5 GO Biological Process	GOBP_NEGATIVE_REGULATION_OF_T_CELL_RECEPTOR_SIGNALING_PATHWAY	25	1.70854	0.00693241	0.0166916
M5 GO Biological Process	GOBP_POSITIVE_REGULATION_OF_RECEPTOR_MEDIATED_ENDOCYTOSIS	62	1.7085	0.00466563	0.0166819
M5 GO Cellular Component	GOCC_COATED_VESICLE_MEMBRANE	94	1.70742	0	0.0168736
M5 GO Biological Process	GOBP_CELLULAR_RESPONSE_TO_UNFOLDED_PROTEIN	80	1.70737	0.00151286	0.0168625
M5 GO Cellular Component	GOCC_TRANS_GOLGI_NETWORK	250	1.70722	0	0.01687
M5 GO Biological Process	GOBP_DENDRITIC_CELL_CHEMOTAXIS	18	1.70639	0.0119863	0.0170146
M5 GO Biological Process	GOBP_POSITIVE_REGULATION_OF_TYROSINE_PHOSPHORYLATION_OF_STAT_PROTEIN	53	1.70564	0.00155039	0.0171323
M5 GO Molecular Function	GOMF_APOLIPOPROTEIN_BINDING	20	1.70542	0.0104712	0.0171533
M5 GO Cellular Component	GOCC_LATE_ENDOSOME	251	1.7052	0	0.0171627
M5 GO Molecular Function	GOMF_CORECEPTOR_ACTIVITY	41	1.70456	0.00325203	0.0172741
M5 GO Biological Process	GOBP_NEGATIVE_REGULATION_OF_INTERLEUKIN_2_PRODUCTION	26	1.70437	0.00683761	0.0172993
M5 GO Biological Process	GOBP_NEGATIVE_REGULATION_OF_LOCOMOTION	347	1.70417	0	0.017312
M5 GO Biological Process	GOBP_ANTIGEN_PROCESSING_AND_PRESENTATION_OF_ENDOGENOUS_ANTIGEN	34	1.70365	0.00525394	0.0173795
M5 GO Biological Process	GOBP_REGULATION_OF_TYPE_2_IMMUNE_RESPONSE	33	1.70307	0.00874126	0.0174799
M5 GO Biological Process	GOBP_COPPER_ION_TRANSPORT	16	1.70074	0.00883392	0.0179215
M5 GO Biological Process	GOBP_NEGATIVE_REGULATION_OF_CYTOKINE_PRODUCTION_INVOLVED_IN_INFLAMMATORY_RESPONSE	25	1.70068	0.00840336	0.0179118
M5 GO Biological Process	GOBP_POSITIVE_REGULATION_OF_TRANSFERASE_ACTIVITY	485	1.70045	0	0.0179385
M5 GO Biological Process	GOBP_NEUTROPHIL_MEDIATED_CYTOTOXICITY	17	1.69917	0.00338983	0.0181494
M5 GO Biological Process	GOBP_SMOOTH_MUSCLE_CELL_MIGRATION	114	1.69897	0	0.018169
M5 GO Biological Process	GOBP_NEGATIVE_REGULATION_OF_VIRAL_TRANSCRIPTION	16	1.69893	0.0102389	0.0181601
M5 GO Biological Process	GOBP_BRANCHING_INVOLVED_IN_BLOOD_VESSEL_MORPHOGENESIS	45	1.69845	0.00473934	0.018217
M5 GO Biological Process	GOBP_ACTIN_FILAMENT_SEVERING	17	1.69827	0.0102041	0.0182388
M5 GO Biological Process	GOBP_POSITIVE_CHEMOTAXIS	44	1.69815	0.00156006	0.0182412
M5 GO Cellular Component	GOCC_PHAGOCYTIC_CUP	22	1.69763	0.00865052	0.0183318
M5 GO Molecular Function	GOMF_TRANSITION_METAL_ION_TRANSMEMBRANE_TRANSPORTER_ACTIVITY	40	1.69709	0.00163132	0.0183962
M2 Reactome pathway	REACTOME_ANTIGEN_PRESENTATION_FOLDING_ASSEMBLY_AND_PEPTIDE_LOADING_OF_CLASS_I_MHC	33	1.6965	0.00859107	0.0185078
M5 GO Biological Process	GOBP_POSITIVE_REGULATION_OF_RESPONSE_TO_WOUNDING	78	1.69607	0.0015625	0.0185777
M5 GO Biological Process	GOBP_REGULATION_OF_GLIAL_CELL_MIGRATION	26	1.69603	0.00686106	0.0185697
M5 GO Cellular Component	GOCC_VESICLE_COAT	62	1.69548	0.00485437	0.018646
M2 BioCarta pathway	BIOCARTA_TNFR2_PATHWAY	17	1.69438	0.00487805	0.0188446
M5 GO Biological Process	GOBP_LEUKOTRIENE_METABOLIC_PROCESS	22	1.69383	0.00831947	0.0189383
M2 Reactome pathway	REACTOME_TNF_RECEPTOR_SUPERFAMILY_TNFSF_MEMBERS_MEDIATING_NON_CANONICAL_NF_KB_PATHWAY	17	1.69382	0.00701754	0.018921
M5 GO Biological Process	GOBP_ANTIGEN_PROCESSING_AND_PRESENTATION_VIA_MHC_CLASS_IB	32	1.69363	0.00329489	0.0189362
M5 GO Molecular Function	GOMF_GDP_BINDING	79	1.69317	0	0.018986
M5 GO Biological Process	GOBP_REGULATION_OF_ALPHA_BETA_T_CELL_DIFFERENTIATION	73	1.69257	0	0.019067
M5 GO Biological Process	GOBP_AMINOGLYCAN_BIOSYNTHETIC_PROCESS	59	1.69096	0.00488599	0.0193734
M5 GO Biological Process	GOBP_NEGATIVE_REGULATION_OF_NON_CANONICAL_NF_KAPPAB_SIGNAL_TRANSDUCTION	27	1.69085	0.00162866	0.019369
M5 GO Biological Process	GOBP_POSITIVE_REGULATION_OF_DNA_BINDING_TRANSCRIPTION_FACTOR_ACTIVITY	264	1.69011	0	0.0195005
M5 GO Biological Process	GOBP_EPIBOLY	35	1.68899	0.00666667	0.0197167
M5 GO Biological Process	GOBP_NEGATIVE_REGULATION_OF_ENDOPEPTIDASE_ACTIVITY	168	1.68817	0	0.0198723
M5 GO Biological Process	GOBP_REGULATION_OF_T_HELPER_CELL_DIFFERENTIATION	38	1.68807	0.00498339	0.0198719
M5 GO Biological Process	GOBP_NEGATIVE_REGULATION_OF_ANTIGEN_RECEPTOR_MEDIATED_SIGNALING_PATHWAY	31	1.68801	0.00980392	0.0198616
M5 GO Cellular Component	GOCC_ACTIN_FILAMENT	132	1.6874	0	0.0199535
M5 GO Biological Process	GOBP_REGULATION_OF_MONOATOMIC_ANION_TRANSMEMBRANE_TRANSPORT	16	1.68735	0.00683761	0.0199497
M5 GO Biological Process	GOBP_NEGATIVE_REGULATION_OF_LEUKOCYTE_APOPTOTIC_PROCESS	66	1.68728	0.00167504	0.0199426
M5 GO Biological Process	GOBP_TYPE_2_IMMUNE_RESPONSE	48	1.68637	0.00329489	0.0201224
M5 GO Biological Process	GOBP_POSITIVE_REGULATION_OF_VIRAL_LIFE_CYCLE	28	1.68576	0.00874126	0.020243
M5 GO Biological Process	GOBP_RESPONSE_TO_OXIDATIVE_STRESS	376	1.68564	0	0.0202478
M5 GO Biological Process	GOBP_GLYCOSYL_COMPOUND_CATABOLIC_PROCESS	29	1.68549	0.00675676	0.0202515
M5 GO Biological Process	GOBP_ACTIVATION_OF_PROTEIN_KINASE_ACTIVITY	93	1.68548	0.00143885	0.0202331
M5 GO Biological Process	GOBP_REGULATION_OF_GTPASE_ACTIVITY	338	1.68543	0	0.0202236
M2 WikiPathways pathway	WP_ERBB_SIGNALING_PATHWAY	46	1.68506	0.00656814	0.0202823
M5 GO Biological Process	GOBP_CD4_POSITIVE_ALPHA_BETA_T_CELL_CYTOKINE_PRODUCTION	26	1.68484	0.0116473	0.0203057
M5 GO Cellular Component	GOCC_COPI_COATED_VESICLE	30	1.68474	0	0.0203027
M5 GO Biological Process	GOBP_REGULATION_OF_SPROUTING_ANGIOGENESIS	43	1.68454	0.00157978	0.0203185
M5 GO Biological Process	GOBP_RESPIRATORY_BURST	28	1.68448	0.0117845	0.0203089
M5 GO Biological Process	GOBP_IMMUNOGLOBULIN_PRODUCTION	145	1.68436	0	0.0203179
M5 GO Biological Process	GOBP_OLIGOSACCHARIDE_METABOLIC_PROCESS	49	1.6842	0.00326264	0.0203334
M5 GO Biological Process	GOBP_VACUOLAR_TRANSPORT	163	1.6841	0	0.0203402
M5 GO Molecular Function	GOMF_CYSTEINE_TYPE_ENDOPEPTIDASE_INHIBITOR_ACTIVITY_INVOLVED_IN_APOPTOTIC_PROCESS	29	1.68398	0.00337838	0.0203372
M5 GO Biological Process	GOBP_REGULATION_OF_IMMUNOGLOBULIN_PRODUCTION	95	1.68381	0.00297177	0.0203473
M5 GO Biological Process	GOBP_REGULATION_OF_ENDOTHELIAL_CELL_DIFFERENTIATION	42	1.68325	0.00341297	0.0204291
M5 GO Biological Process	GOBP_CELLULAR_RESPONSE_TO_INTERFERON_ALPHA	19	1.68309	0.00693241	0.0204412
M2 Reactome pathway	REACTOME_N_GLYCAN_ANTENNAE_ELONGATION_IN_THE_MEDIAL_TRANS_GOLGI	23	1.68276	0.00699301	0.0204857
M5 GO Biological Process	GOBP_REGULATION_OF_MONOATOMIC_ANION_TRANSPORT	25	1.68245	0.00339559	0.0205292
M5 GO Biological Process	GOBP_NITRIC_OXIDE_SYNTHASE_BIOSYNTHETIC_PROCESS	28	1.68195	0.00696864	0.0206157
M5 GO Biological Process	GOBP_POSITIVE_REGULATION_OF_WOUND_HEALING	61	1.68174	0	0.0206385
M5 GO Biological Process	GOBP_NEGATIVE_REGULATION_OF_PHAGOCYTOSIS	27	1.68137	0.0034965	0.0207032
M2 Reactome pathway	REACTOME_SYNTHESIS_OF_PIPS_AT_THE_PLASMA_MEMBRANE	50	1.68103	0.00654665	0.0207648
M2 Reactome pathway	REACTOME_ADP_SIGNALLING_THROUGH_P2Y_PURINOCEPTOR_12	21	1.68101	0.00819672	0.0207473
M5 GO Biological Process	GOBP_POSITIVE_REGULATION_OF_ACTIN_FILAMENT_POLYMERIZATION	53	1.68074	0.00494234	0.0207687
M5 GO Biological Process	GOBP_NEGATIVE_REGULATION_OF_ENDOTHELIAL_CELL_APOPTOTIC_PROCESS	33	1.68033	0.00670017	0.0208127
M2 Reactome pathway	REACTOME_CYTOKINE_SIGNALING_IN_IMMUNE_SYSTEM	437	1.67853	0	0.0211612
M5 GO Biological Process	GOBP_FATTY_ACID_DERIVATIVE_BIOSYNTHETIC_PROCESS	19	1.67786	0.0165837	0.0212691
M2 Reactome pathway	REACTOME_DAP12_SIGNALING	28	1.67767	0.0066335	0.0212878
M5 GO Biological Process	GOBP_REGULATION_OF_PROGRAMMED_NECROTIC_CELL_DEATH	28	1.67763	0.0118644	0.0212775
M5 GO Biological Process	GOBP_B_CELL_ACTIVATION_INVOLVED_IN_IMMUNE_RESPONSE	93	1.67737	0.00156495	0.0213099
M5 GO Cellular Component	GOCC_PLASMA_MEMBRANE_RAFT	133	1.67643	0	0.0214783
M5 GO Biological Process	GOBP_BEHAVIORAL_RESPONSE_TO_PAIN	31	1.67603	0.00985222	0.0215413
M5 GO Biological Process	GOBP_REGULATION_OF_RESPIRATORY_BURST	15	1.67562	0.0102215	0.0215926
M5 GO Molecular Function	GOMF_ARP2_3_COMPLEX_BINDING	16	1.67558	0.0088968	0.0215767
M5 GO Molecular Function	GOMF_KINASE_ACTIVATOR_ACTIVITY	135	1.67548	0	0.0215757
M5 GO Biological Process	GOBP_FATTY_ACID_TRANSMEMBRANE_TRANSPORT	17	1.67543	0.0108696	0.0215641
M5 GO Biological Process	GOBP_ADENYLATE_CYCLASE_INHIBITING_G_PROTEIN_COUPLED_RECEPTOR_SIGNALING_PATHWAY	68	1.67527	0.00161551	0.0215674
M5 GO Biological Process	GOBP_POSITIVE_REGULATION_OF_CELL_ADHESION_MEDIATED_BY_INTEGRIN	21	1.67467	0.0133111	0.0216866
M5 GO Biological Process	GOBP_NON_CANONICAL_NF_KAPPAB_SIGNAL_TRANSDUCTION	120	1.67394	0.0014881	0.021813
M5 GO Molecular Function	GOMF_GUANYL_NUCLEOTIDE_EXCHANGE_FACTOR_ACTIVITY	202	1.67292	0	0.022024
M2 Reactome pathway	REACTOME_SIGNALING_BY_INTERLEUKINS	265	1.67054	0	0.0225411
M5 GO Biological Process	GOBP_POSITIVE_REGULATION_OF_PROTEOLYSIS	358	1.67049	0	0.0225307
M5 GO Biological Process	GOBP_REGULATION_OF_RECEPTOR_BINDING	23	1.66975	0.00862069	0.0226968
M5 GO Biological Process	GOBP_POSITIVE_REGULATION_OF_RESPONSE_TO_ENDOPLASMIC_RETICULUM_STRESS	34	1.66954	0.00900901	0.0227328
M5 GO Biological Process	GOBP_TYPE_II_HYPERSENSITIVITY	18	1.66933	0.0154639	0.0227582
M5 GO Molecular Function	GOMF_TRANSFORMING_GROWTH_FACTOR_BETA_RECEPTOR_BINDING	28	1.66894	0.00694444	0.0228216
M5 GO Biological Process	GOBP_REGULATION_OF_ICOSANOID_SECRETION	26	1.66736	0.00488599	0.0231567
M5 GO Biological Process	GOBP_PROSTAGLANDIN_TRANSPORT	30	1.66721	0.00676819	0.0231668
M5 GO Biological Process	GOBP_RESPONSE_TO_UV_A	15	1.66712	0.0123894	0.0231591
M5 GO Biological Process	GOBP_SEROTONIN_SECRETION	17	1.66631	0.00509338	0.023331
M5 GO Molecular Function	GOMF_POLYPEPTIDE_N_ACETYLGALACTOSAMINYLTRANSFERASE_ACTIVITY	18	1.66595	0.0135593	0.0233944
M5 GO Biological Process	GOBP_IRON_ION_TRANSPORT	57	1.66553	0.00323625	0.0234713
M5 GO Biological Process	GOBP_T_CELL_DIFFERENTIATION_INVOLVED_IN_IMMUNE_RESPONSE	80	1.66447	0	0.0237085
M5 GO Biological Process	GOBP_CELLULAR_RESPONSE_TO_TOPOLOGICALLY_INCORRECT_PROTEIN	101	1.66413	0	0.0237589
M5 GO Biological Process	GOBP_POSITIVE_REGULATION_OF_MAST_CELL_ACTIVATION	32	1.66366	0.00343643	0.0238456
M2 Reactome pathway	REACTOME_TOLL_LIKE_RECEPTOR_9_TLR9_CASCADE	93	1.66344	0.00149925	0.0238758
M5 GO Biological Process	GOBP_REGULATION_OF_OXIDOREDUCTASE_ACTIVITY	90	1.66192	0	0.0242274
M5 GO Biological Process	GOBP_REGULATION_OF_INOSITOL_PHOSPHATE_BIOSYNTHETIC_PROCESS	17	1.66187	0.00888099	0.0242197
M5 GO Biological Process	GOBP_GRANULOCYTE_MACROPHAGE_COLONY_STIMULATING_FACTOR_PRODUCTION	17	1.66102	0.0121317	0.0243996
M5 GO Biological Process	GOBP_POSITIVE_REGULATION_OF_LAMELLIPODIUM_ORGANIZATION	37	1.66099	0.0101695	0.0243814
M5 GO Molecular Function	GOMF_GUANYL_NUCLEOTIDE_BINDING	376	1.66031	0	0.0245339
M5 GO Biological Process	GOBP_WOUND_HEALING_SPREADING_OF_EPIDERMAL_CELLS	20	1.65944	0.00886525	0.0247265
M5 GO Biological Process	GOBP_MORPHOGENESIS_OF_AN_ENDOTHELIUM	19	1.65944	0.00665557	0.0247028
M2 Reactome pathway	REACTOME_G_BETA_GAMMA_SIGNALLING_THROUGH_PI3KGAMMA	24	1.65913	0.00512821	0.0247601
M5 GO Biological Process	GOBP_POSITIVE_REGULATION_OF_TOR_SIGNALING	69	1.6587	0.00470219	0.0248399
M5 GO Biological Process	GOBP_TRANSFORMING_GROWTH_FACTOR_BETA_RECEPTOR_SIGNALING_PATHWAY	205	1.65842	0	0.0248981
M5 GO Biological Process	GOBP_MUCOPOLYSACCHARIDE_METABOLIC_PROCESS	78	1.65822	0	0.024926
M5 GO Molecular Function	GOMF_INTRAMEMBRANE_LIPID_TRANSPORTER_ACTIVITY	49	1.65795	0.00487013	0.0249559
M5 GO Biological Process	GOBP_HISTAMINE_TRANSPORT	19	1.65762	0.0172117	0.0250104
M5 GO Biological Process	GOBP_REGULATION_OF_COMPLEMENT_ACTIVATION	20	1.65742	0.0124777	0.0250352
M2 WikiPathways pathway	WP_EICOSANOID_SYNTHESIS	17	1.65715	0.0157068	0.0250834
M5 GO Cellular Component	GOCC_CELL_LEADING_EDGE	410	1.65693	0	0.0251243
M5 GO Biological Process	GOBP_RETROGRADE_TRANSPORT_ENDOSOME_TO_GOLGI	87	1.65641	0.00151515	0.0252385
M5 GO Molecular Function	GOMF_GLUCOSYLTRANSFERASE_ACTIVITY	18	1.65616	0.0123023	0.0252791
M5 GO Biological Process	GOBP_REGULATION_OF_KERATINOCYTE_MIGRATION	15	1.65572	0.0137694	0.0253671
M5 GO Biological Process	GOBP_POSITIVE_REGULATION_OF_FATTY_ACID_METABOLIC_PROCESS	48	1.65536	0.0049505	0.0254222
M5 GO Biological Process	GOBP_ACTIN_POLYMERIZATION_OR_DEPOLYMERIZATION	190	1.65516	0.00143062	0.0254575
M5 GO Biological Process	GOBP_REGULATION_OF_VIRAL_GENOME_REPLICATION	83	1.65452	0.00311042	0.0255941
M2 Reactome pathway	REACTOME_PROGRAMMED_CELL_DEATH	133	1.65352	0.00144509	0.0258325
M5 GO Biological Process	GOBP_NEGATIVE_REGULATION_OF_VASCULAR_PERMEABILITY	19	1.65215	0.011745	0.0261349
M5 GO Biological Process	GOBP_EXTRACELLULAR_MATRIX_ASSEMBLY	45	1.65169	0.00646204	0.0262296
M5 GO Biological Process	GOBP_LIPOPROTEIN_LOCALIZATION	19	1.65119	0.0105263	0.02632
M5 GO Molecular Function	GOMF_G_PROTEIN_COUPLED_RECEPTOR_ACTIVITY	427	1.65099	0	0.0263493
M5 GO Biological Process	GOBP_POSITIVE_REGULATION_OF_RESPONSE_TO_TUMOR_CELL	18	1.65048	0.0122592	0.0264588
M5 GO Biological Process	GOBP_REGULATION_OF_LIPASE_ACTIVITY	79	1.64998	0.00149254	0.0265773
M5 GO Biological Process	GOBP_NEGATIVE_REGULATION_OF_ENDOCYTOSIS	72	1.64995	0.00151745	0.0265606
M2 Reactome pathway	REACTOME_REGULATED_NECROSIS	51	1.64977	0.00837521	0.0265856
M5 GO Biological Process	GOBP_PURINE_NUCLEOSIDE_MONOPHOSPHATE_CATABOLIC_PROCESS	15	1.64941	0.0189655	0.0266609
M5 GO Biological Process	GOBP_CD8_POSITIVE_ALPHA_BETA_T_CELL_PROLIFERATION	22	1.64938	0.00854701	0.0266421
M5 GO Biological Process	GOBP_PROTEIN_TARGETING_TO_LYSOSOME	29	1.6488	0.0117647	0.0267548
M2 Reactome pathway	REACTOME_SIGNAL_AMPLIFICATION	32	1.64874	0.0049505	0.026752
M5 GO Molecular Function	GOMF_MOLECULAR_SEQUESTERING_ACTIVITY	45	1.64863	0.00489396	0.0267583
M5 GO Biological Process	GOBP_NEGATIVE_REGULATION_OF_ENDOTHELIAL_CELL_MIGRATION	55	1.64833	0.00335008	0.026814
M2 Reactome pathway	REACTOME_PI_METABOLISM	76	1.64812	0.00158983	0.0268435
M5 GO Biological Process	GOBP_MEMBRANE_RAFT_ORGANIZATION	23	1.64749	0.0142631	0.0269934
M5 GO Biological Process	GOBP_FAT_SOLUBLE_VITAMIN_METABOLIC_PROCESS	36	1.64746	0.0138648	0.0269744
M5 GO Biological Process	GOBP_GRANULOCYTE_DIFFERENTIATION	48	1.64727	0.0049505	0.0270067
M5 GO Biological Process	GOBP_CALCIUM_MEDIATED_SIGNALING_USING_INTRACELLULAR_CALCIUM_SOURCE	21	1.64598	0.0136286	0.0273228
M2 Reactome pathway	REACTOME_COLLAGEN_CHAIN_TRIMERIZATION	37	1.64577	0.00980392	0.0273536
M5 GO Molecular Function	GOMF_T_CELL_RECEPTOR_BINDING	24	1.64568	0.0140105	0.0273484
M5 GO Biological Process	GOBP_REGULATION_OF_NATURAL_KILLER_CELL_PROLIFERATION	25	1.64556	0.0116667	0.0273522
M2 BioCarta pathway	BIOCARTA_GLEEVEC_PATHWAY	23	1.64537	0.020339	0.0273801
M5 GO Biological Process	GOBP_P38MAPK_CASCADE	57	1.64519	0.00312989	0.0274058
M5 GO Biological Process	GOBP_COPII_COATED_VESICLE_CARGO_LOADING	15	1.64492	0.0107335	0.0274504
M5 GO Biological Process	GOBP_REGULATION_OF_NECROPTOTIC_PROCESS	23	1.64478	0.0114566	0.027467
M5 GO Cellular Component	GOCC_CLATHRIN_COATED_PIT	72	1.64471	0.00476191	0.0274646
M5 GO Biological Process	GOBP_NEGATIVE_REGULATION_OF_WOUND_HEALING	66	1.64412	0.00158983	0.027571
M5 GO Biological Process	GOBP_NEGATIVE_REGULATION_OF_MYELOID_LEUKOCYTE_DIFFERENTIATION	57	1.64355	0.0115702	0.0276978
M5 GO Biological Process	GOBP_MACROPHAGE_ACTIVATION_INVOLVED_IN_IMMUNE_RESPONSE	19	1.64347	0.0160256	0.0277002
M2 WikiPathways pathway	WP_GPCRS_CLASS_A_RHODOPSIN_LIKE	172	1.64285	0	0.0278457
M5 GO Biological Process	GOBP_BILE_ACID_AND_BILE_SALT_TRANSPORT	27	1.64267	0.00683761	0.027872
M2 WikiPathways pathway	WP_P38_MAPK_SIGNALING_PATHWAY	33	1.64184	0.00658979	0.0280575
M5 GO Biological Process	GOBP_ASTROCYTE_DEVELOPMENT	38	1.64147	0.0164745	0.0281369
M2 Reactome pathway	REACTOME_SIGNALING_BY_SCF_KIT	36	1.64088	0.0066778	0.0282684
M5 GO Molecular Function	GOMF_OPSONIN_BINDING	18	1.64071	0.0105263	0.0282872
M5 GO Molecular Function	GOMF_NATURAL_KILLER_CELL_LECTIN_LIKE_RECEPTOR_BINDING	27	1.63972	0.00859107	0.0285398
M5 GO Biological Process	GOBP_POSITIVE_REGULATION_OF_T_CELL_CYTOKINE_PRODUCTION	25	1.6396	0.00847458	0.0285444
M5 GO Biological Process	GOBP_POSITIVE_REGULATION_OF_BONE_RESORPTION	26	1.63955	0.0167785	0.0285322
M5 GO Biological Process	GOBP_NEGATIVE_REGULATION_OF_BIOMINERAL_TISSUE_DEVELOPMENT	24	1.63927	0.0145631	0.0285644
M5 GO Biological Process	GOBP_TISSUE_HOMEOSTASIS	267	1.63904	0	0.0285865
M5 GO Biological Process	GOBP_NEGATIVE_REGULATION_OF_ALPHA_BETA_T_CELL_PROLIFERATION	16	1.63834	0.0124555	0.0287404
M2 Reactome pathway	REACTOME_TERMINATION_OF_O_GLYCAN_BIOSYNTHESIS	17	1.6379	0.0136986	0.0288539
M5 GO Biological Process	GOBP_REGULATION_OF_NEUROINFLAMMATORY_RESPONSE	30	1.63775	0.0171821	0.0288621
M5 GO Biological Process	GOBP_IRON_ION_TRANSMEMBRANE_TRANSPORT	29	1.63759	0.0104167	0.0288879
M5 GO Biological Process	GOBP_GLIAL_CELL_MIGRATION	71	1.63755	0.00325203	0.0288706
M5 GO Biological Process	GOBP_CELLULAR_METABOLIC_COMPOUND_SALVAGE	35	1.63751	0.0107914	0.0288582
M2 Reactome pathway	REACTOME_APOPTOSIS	102	1.63737	0.00152905	0.0288762
M5 GO Biological Process	GOBP_VESICLE_CARGO_LOADING	25	1.63608	0.0101351	0.0292436
M5 GO Biological Process	GOBP_RESPONSE_TO_CORTICOSTEROID	98	1.63463	0.00153846	0.029632
M2 Reactome pathway	REACTOME_PYROPTOSIS	20	1.63374	0.0223368	0.0298374
M5 GO Molecular Function	GOMF_CADHERIN_BINDING	69	1.63372	0.00162602	0.0298184
M5 GO Biological Process	GOBP_IMMUNE_RESPONSE_TO_TUMOR_CELL	28	1.63306	0.00699301	0.0299699
M5 GO Biological Process	GOBP_NEGATIVE_REGULATION_OF_BLOOD_PRESSURE	65	1.63283	0.0015083	0.0299975
M5 GO Biological Process	GOBP_POSITIVE_REGULATION_OF_TRANSCRIPTION_FROM_RNA_POLYMERASE_II_PROMOTER_INVOLVED_IN_CELLULAR_RESPONSE_TO_CHEMICAL_STIMULUS	16	1.63266	0.0141343	0.0300162
M5 GO Biological Process	GOBP_POSITIVE_REGULATION_OF_INFLAMMASOME_MEDIATED_SIGNALING_PATHWAY	21	1.63246	0.015873	0.0300523
M2 WikiPathways pathway	WP_EPO_RECEPTOR_SIGNALING	25	1.6324	0.0119658	0.0300381
M5 GO Molecular Function	GOMF_PROTEASE_BINDING	174	1.63228	0	0.0300412
M5 GO Molecular Function	GOMF_GTP_DEPENDENT_PROTEIN_BINDING	23	1.63211	0.00688468	0.0300444
M5 GO Molecular Function	GOMF_ALDEHYDE_DEHYDROGENASE_NAD_P_PLUS_ACTIVITY	19	1.63199	0.0238908	0.0300428
M5 GO Biological Process	GOBP_EXTRINSIC_APOPTOTIC_SIGNALING_PATHWAY	239	1.63093	0	0.030327
M5 GO Biological Process	GOBP_PROTEIN_CATABOLIC_PROCESS_IN_THE_VACUOLE	22	1.62969	0.0153846	0.0306468
M5 GO Biological Process	GOBP_CHRONIC_INFLAMMATORY_RESPONSE	20	1.62937	0.0136054	0.0307218
M2 Reactome pathway	REACTOME_PROSTACYCLIN_SIGNALLING_THROUGH_PROSTACYCLIN_RECEPTOR	18	1.62933	0.0141093	0.0307012
M2 Reactome pathway	REACTOME_EXTRA_NUCLEAR_ESTROGEN_SIGNALING	67	1.62919	0	0.0307115
M5 GO Biological Process	GOBP_VASCULAR_TRANSPORT	22	1.62836	0.0175439	0.0309082
M5 GO Molecular Function	GOMF_METALLOPEPTIDASE_ACTIVITY	177	1.6281	0	0.0309691
M5 GO Biological Process	GOBP_NEGATIVE_REGULATION_OF_CHEMOTAXIS	56	1.62713	0.00301659	0.0312612
M5 GO Biological Process	GOBP_NEGATIVE_REGULATION_OF_CELL_KILLING	45	1.62692	0.00664452	0.0312979
M5 GO Biological Process	GOBP_ERBB_SIGNALING_PATHWAY	123	1.62675	0.00145773	0.0313286
M5 GO Biological Process	GOBP_POSITIVE_REGULATION_OF_CELL_MATRIX_ADHESION	63	1.6264	0.00159744	0.0314151
M5 GO Biological Process	GOBP_REGULATION_OF_T_HELPER_17_CELL_DIFFERENTIATION	19	1.62573	0.0136054	0.0316016
M5 GO Biological Process	GOBP_REGULATION_OF_INTEGRIN_ACTIVATION	18	1.6256	0.0140105	0.0316102
M5 GO Biological Process	GOBP_RAS_PROTEIN_SIGNAL_TRANSDUCTION	337	1.62531	0	0.0316844
M5 GO Biological Process	GOBP_REGULATION_OF_CELL_SUBSTRATE_JUNCTION_ORGANIZATION	69	1.62516	0.0030581	0.0317061
M2 BioCarta pathway	BIOCARTA_ETS_PATHWAY	17	1.62515	0.0176991	0.031681
M5 GO Biological Process	GOBP_PROTEIN_N_LINKED_GLYCOSYLATION_VIA_ASPARAGINE	18	1.62454	0.0152542	0.0318104
M5 GO Biological Process	GOBP_REGULATION_OF_LIPID_KINASE_ACTIVITY	36	1.62428	0.0084317	0.0318604
M5 GO Molecular Function	GOMF_COMPLEMENT_BINDING	24	1.62402	0.0205128	0.0319048
M5 GO Biological Process	GOBP_REGULATION_OF_RIBONUCLEASE_ACTIVITY	15	1.62372	0.0218855	0.0319735
M5 GO Cellular Component	GOCC_EXTRINSIC_COMPONENT_OF_PLASMA_MEMBRANE	145	1.6229	0	0.0321788
M5 GO Biological Process	GOBP_NUCLEOSIDE_MONOPHOSPHATE_CATABOLIC_PROCESS	24	1.62286	0.00888099	0.032162
M5 GO Biological Process	GOBP_RIBONUCLEOTIDE_CATABOLIC_PROCESS	47	1.62268	0.00626959	0.032184
M2 Reactome pathway	REACTOME_INTERLEUKIN_2_FAMILY_SIGNALING	31	1.62267	0.00682594	0.0321578
M5 GO Molecular Function	GOMF_HEPARAN_SULFATE_PROTEOGLYCAN_BINDING	21	1.62203	0.0188034	0.0323291
M5 GO Biological Process	GOBP_PROTEIN_LOCALIZATION_TO_ENDOSOME	28	1.62202	0.0120069	0.0323047
M5 GO Molecular Function	GOMF_SIGNALING_RECEPTOR_INHIBITOR_ACTIVITY	34	1.62191	0.0113452	0.0323114
M5 GO Biological Process	GOBP_VIRAL_GENOME_REPLICATION	116	1.62172	0.002849	0.0323342
M5 GO Biological Process	GOBP_REGULATION_OF_MACROAUTOPHAGY	116	1.62169	0.00150602	0.0323127
M5 GO Biological Process	GOBP_NITRIC_OXIDE_MEDIATED_SIGNAL_TRANSDUCTION	27	1.62098	0.0136752	0.032489
M5 GO Biological Process	GOBP_REGULATION_OF_LYMPHOCYTE_APOPTOTIC_PROCESS	73	1.62038	0.0030303	0.0326438
M2 Reactome pathway	REACTOME_INTERLEUKIN_17_SIGNALING	58	1.62024	0.00674536	0.0326625
M5 GO Biological Process	GOBP_POSITIVE_REGULATION_OF_LEUKOCYTE_APOPTOTIC_PROCESS	33	1.62017	0.0118846	0.0326557
M5 GO Biological Process	GOBP_REGULATION_OF_BLOOD_PRESSURE	204	1.62015	0	0.0326312
M5 GO Biological Process	GOBP_CYTOSOLIC_TRANSPORT	166	1.6184	0.00290698	0.0331068
M5 GO Biological Process	GOBP_INTRACELLULAR_IRON_ION_HOMEOSTASIS	67	1.61797	0	0.0332168
M5 GO Biological Process	GOBP_REGULATION_OF_TOLL_LIKE_RECEPTOR_SIGNALING_PATHWAY	28	1.61764	0.0136986	0.0332788
M5 GO Biological Process	GOBP_PROTEIN_HYDROXYLATION	28	1.61724	0.00700525	0.0333688
M5 GO Biological Process	GOBP_RENAL_FILTRATION	29	1.61708	0.00513699	0.0333858
M5 GO Biological Process	GOBP_PROTEIN_TARGETING_TO_VACUOLE	46	1.61623	0.00995025	0.03361
M5 GO Biological Process	GOBP_NEGATIVE_REGULATION_OF_ORGANIC_ACID_TRANSPORT	30	1.61457	0.0145631	0.0341035
M2 Reactome pathway	REACTOME_ADP_SIGNALLING_THROUGH_P2Y_PURINOCEPTOR_1	24	1.61382	0.0169492	0.0343257
M5 GO Biological Process	GOBP_MULTICELLULAR_ORGANISMAL_LEVEL_CHEMICAL_HOMEOSTASIS	82	1.61332	0.00470219	0.0344573
MH Hallmark	HALLMARK_GLYCOLYSIS	198	1.61326	0	0.0344472
M5 GO Molecular Function	GOMF_SMAD_BINDING	85	1.61326	0.00304878	0.0344177
M2 Reactome pathway	REACTOME_FORMATION_OF_FIBRIN_CLOT_CLOTTING_CASCADE	37	1.61296	0.0150502	0.0344708
M2 Reactome pathway	REACTOME_G_ALPHA_S_SIGNALLING_EVENTS	121	1.6129	0	0.0344645
M5 GO Biological Process	GOBP_ACTIN_NUCLEATION	55	1.61285	0.00944882	0.0344517
M5 GO Biological Process	GOBP_SMOOTH_MUSCLE_CELL_PROLIFERATION	196	1.61195	0	0.034715
M5 GO Biological Process	GOBP_NEGATIVE_REGULATION_OF_SPROUTING_ANGIOGENESIS	15	1.61188	0.0227273	0.0347085
M5 GO Biological Process	GOBP_REGULATION_OF_ENDOTHELIAL_CELL_DEVELOPMENT	19	1.61146	0.0251799	0.0348139
M5 GO Biological Process	GOBP_TOLL_LIKE_RECEPTOR_4_SIGNALING_PATHWAY	57	1.61138	0.00161031	0.034811
M2 WikiPathways pathway	WP_COMPREHENSIVE_IL_17A_SIGNALING	99	1.61138	0.00296296	0.0347822
M5 GO Biological Process	GOBP_RESPONSE_TO_REACTIVE_OXYGEN_SPECIES	191	1.61103	0	0.0348513
M5 GO Molecular Function	GOMF_SIGNALING_RECEPTOR_REGULATOR_ACTIVITY	482	1.61045	0	0.0350136
M2 Reactome pathway	REACTOME_G_ALPHA_Q_SIGNALLING_EVENTS	196	1.61014	0.00137363	0.035098
M2 Reactome pathway	REACTOME_ISG15_ANTIVIRAL_MECHANISM	28	1.60954	0.0179445	0.0352641
M5 GO Molecular Function	GOMF_GROWTH_FACTOR_BINDING	140	1.60936	0	0.0353114
M5 GO Molecular Function	GOMF_EPHRIN_RECEPTOR_BINDING	32	1.60925	0.0134003	0.0353136
M5 GO Cellular Component	GOCC_VACUOLAR_MEMBRANE	272	1.6092	0	0.0353039
M5 GO Molecular Function	GOMF_PHOSPHORUS_OXYGEN_LYASE_ACTIVITY	25	1.60884	0.0217028	0.0353923
M5 GO Biological Process	GOBP_PROTEIN_LOCALIZATION_TO_VACUOLE	79	1.60861	0.00314961	0.0354339
M5 GO Biological Process	GOBP_POSITIVE_REGULATION_OF_STRESS_ACTIVATED_PROTEIN_KINASE_SIGNALING_CASCADE	131	1.60857	0.00146628	0.0354139
M5 GO Biological Process	GOBP_PURINE_CONTAINING_COMPOUND_SALVAGE	22	1.60833	0.0140845	0.0354673
M5 GO Biological Process	GOBP_POSITIVE_REGULATION_OF_LYMPHOCYTE_APOPTOTIC_PROCESS	21	1.60814	0.0140598	0.0355069
M5 GO Biological Process	GOBP_REGULATION_OF_APOPTOTIC_SIGNALING_PATHWAY	421	1.60796	0	0.0355234
M5 GO Biological Process	GOBP_FOAM_CELL_DIFFERENTIATION	32	1.60716	0.0187394	0.0357462
M5 GO Biological Process	GOBP_COLLAGEN_ACTIVATED_SIGNALING_PATHWAY	17	1.60656	0.0174216	0.0358922
M5 GO Biological Process	GOBP_ACTIN_FILAMENT_ORGANIZATION	456	1.60513	0	0.0363768
M5 GO Biological Process	GOBP_VESICLE_COATING	33	1.60504	0.0172117	0.0363781
M5 GO Biological Process	GOBP_NEGATIVE_REGULATION_OF_CANONICAL_NF_KAPPAB_SIGNAL_TRANSDUCTION	52	1.60455	0.00630915	0.0364993
M5 GO Biological Process	GOBP_MUSCLE_CELL_MIGRATION	129	1.60452	0.00142857	0.036476
M5 GO Biological Process	GOBP_NEGATIVE_REGULATION_OF_RESPONSE_TO_WOUNDING	90	1.60433	0.00154083	0.0364999
M2 Reactome pathway	REACTOME_VEGFR2_MEDIATED_VASCULAR_PERMEABILITY	29	1.60399	0.0115512	0.0365891
M5 GO Cellular Component	GOCC_MEMBRANE_COAT	98	1.60366	0.0015083	0.0366764
M5 GO Biological Process	GOBP_REGULATION_OF_CELL_SHAPE	140	1.60363	0.00296736	0.0366556
M5 GO Molecular Function	GOMF_FAD_BINDING	43	1.60293	0.00661157	0.0368477
M2 BioCarta pathway	BIOCARTA_DEATH_PATHWAY	30	1.60271	0.017094	0.0368918
M2 WikiPathways pathway	WP_GPCRS_OTHER	81	1.60258	0.00162602	0.0369008
M5 GO Biological Process	GOBP_FATTY_ACID_TRANSPORT	113	1.60196	0	0.0370713
M2 WikiPathways pathway	WP_MAPK_SIGNALING_PATHWAY	159	1.60182	0	0.0370909
M5 GO Biological Process	GOBP_INTRINSIC_APOPTOTIC_SIGNALING_PATHWAY_IN_RESPONSE_TO_ENDOPLASMIC_RETICULUM_STRESS	65	1.60175	0.00157233	0.0370799
M2 BioCarta pathway	BIOCARTA_TH1TH2_PATHWAY	18	1.60155	0.0250896	0.0371131
M5 GO Biological Process	GOBP_REGULATION_OF_VIRAL_TRANSCRIPTION	23	1.60131	0.0134454	0.0371658
M5 GO Biological Process	GOBP_MONOCARBOXYLIC_ACID_TRANSPORT	174	1.6011	0.00142857	0.0372015
M5 GO Biological Process	GOBP_INTRACELLULAR_RECEPTOR_SIGNALING_PATHWAY	317	1.60035	0	0.0374133
M5 GO Molecular Function	GOMF_LIPID_TRANSPORTER_ACTIVITY	176	1.59999	0	0.0375061
M5 GO Biological Process	GOBP_REGULATION_OF_CELL_MATRIX_ADHESION	125	1.59996	0.00299401	0.0374904
M5 GO Biological Process	GOBP_REGULATION_OF_TRANSLATION_IN_RESPONSE_TO_STRESS	23	1.59903	0.0242634	0.0377567
M2 BioCarta pathway	BIOCARTA_IL12_PATHWAY	19	1.59878	0.013468	0.0378107
M5 GO Biological Process	GOBP_POSITIVE_REGULATION_OF_ANTIGEN_RECEPTOR_MEDIATED_SIGNALING_PATHWAY	27	1.59861	0.0196429	0.0378287
M2 Reactome pathway	REACTOME_PRESYNAPTIC_FUNCTION_OF_KAINATE_RECEPTORS	20	1.59844	0.028169	0.0378636
M5 GO Biological Process	GOBP_PURINE_NUCLEOBASE_METABOLIC_PROCESS	22	1.59837	0.0171233	0.0378573
M5 GO Biological Process	GOBP_POSITIVE_REGULATION_OF_OXIDOREDUCTASE_ACTIVITY	54	1.59832	0.00778816	0.0378476
M5 GO Biological Process	GOBP_T_HELPER_1_CELL_DIFFERENTIATION	27	1.59824	0.0212389	0.037845
M5 GO Biological Process	GOBP_T_CELL_APOPTOTIC_PROCESS	69	1.59808	0	0.0378637
M5 GO Biological Process	GOBP_NUCLEOTIDE_SALVAGE	24	1.59782	0.0124113	0.0379127
M2 Reactome pathway	REACTOME_SPHINGOLIPID_METABOLISM	77	1.59761	0.00470958	0.0379687
M2 WikiPathways pathway	WP_OXIDATIVE_DAMAGE_RESPONSE	41	1.59757	0.0135823	0.0379562
M5 GO Biological Process	GOBP_RESPONSE_TO_TRANSFORMING_GROWTH_FACTOR_BETA	249	1.59708	0	0.0380802
M5 GO Biological Process	GOBP_NEGATIVE_REGULATION_OF_PEPTIDASE_ACTIVITY	228	1.59699	0	0.0380774
M5 GO Biological Process	GOBP_CELLULAR_RESPONSE_TO_GLUCOCORTICOID_STIMULUS	48	1.59694	0.00347826	0.0380701
M5 GO Biological Process	GOBP_AUTOPHAGOSOME_ORGANIZATION	121	1.59632	0.00150376	0.0382663
M5 GO Biological Process	GOBP_PHOSPHOLIPASE_C_ACTIVATING_G_PROTEIN_COUPLED_RECEPTOR_SIGNALING_PATHWAY	102	1.59624	0.00459418	0.0382563
M5 GO Biological Process	GOBP_URATE_METABOLIC_PROCESS	15	1.59595	0.0241796	0.038316
M5 GO Cellular Component	GOCC_CLATHRIN_COATED_VESICLE	119	1.5955	0.0014556	0.0384384
M5 GO Biological Process	GOBP_REGULATION_OF_CELLULAR_RESPONSE_TO_VASCULAR_ENDOTHELIAL_GROWTH_FACTOR_STIMULUS	25	1.59491	0.0169205	0.038589
M5 GO Biological Process	GOBP_NEGATIVE_REGULATION_OF_PHOSPHORYLATION	361	1.59489	0	0.0385672
M5 GO Biological Process	GOBP_RESPONSE_TO_PLATELET_DERIVED_GROWTH_FACTOR	23	1.59465	0.0213115	0.0386292
M2 WikiPathways pathway	WP_INSULIN_SIGNALING	158	1.59455	0	0.0386286
M5 GO Biological Process	GOBP_POSITIVE_REGULATION_OF_FAT_CELL_DIFFERENTIATION	71	1.59429	0.00156006	0.0386914
M5 GO Biological Process	GOBP_CELL_JUNCTION_DISASSEMBLY	26	1.59426	0.0189003	0.0386759
M2 WikiPathways pathway	WP_IL_6_SIGNALING_PATHWAY	99	1.59421	0	0.0386638
M5 GO Biological Process	GOBP_AMYLOID_PRECURSOR_PROTEIN_CATABOLIC_PROCESS	60	1.5937	0.00625978	0.0388038
M2 Reactome pathway	REACTOME_SIGNALLING_TO_ERKS	26	1.59344	0.0151515	0.0388688
M5 GO Biological Process	GOBP_POSITIVE_REGULATION_OF_FIBROBLAST_MIGRATION	25	1.59321	0.0284281	0.0389118
M5 GO Biological Process	GOBP_POSITIVE_REGULATION_OF_T_CELL_RECEPTOR_SIGNALING_PATHWAY	19	1.59319	0.0332168	0.0388917
M5 GO Molecular Function	GOMF_RETINOIC_ACID_BINDING	16	1.59262	0.0266904	0.0390474
M5 GO Molecular Function	GOMF_DIPEPTIDASE_ACTIVITY	16	1.5926	0.0165441	0.0390211
M5 GO Biological Process	GOBP_MACROPHAGE_DIFFERENTIATION	58	1.5926	0.0132231	0.0389914
M5 GO Biological Process	GOBP_NEGATIVE_REGULATION_OF_EPITHELIAL_CELL_MIGRATION	73	1.59218	0.00156495	0.0391015
M5 GO Biological Process	GOBP_RESPONSE_TO_ACID_CHEMICAL	109	1.59204	0.00444444	0.0391075
M5 GO Biological Process	GOBP_PHOSPHOLIPID_CATABOLIC_PROCESS	55	1.59176	0.00322061	0.039178
M5 GO Biological Process	GOBP_REGULATION_OF_P38MAPK_CASCADE	43	1.59121	0.0115512	0.0393388
M5 GO Biological Process	GOBP_REGULATION_OF_PH	106	1.5909	0.00151286	0.0394097
M5 GO Molecular Function	GOMF_ZINC_ION_TRANSMEMBRANE_TRANSPORTER_ACTIVITY	23	1.59071	0.00838926	0.0394433
M5 GO Biological Process	GOBP_NEGATIVE_REGULATION_OF_LEUKOCYTE_CHEMOTAXIS	16	1.59044	0.0259516	0.0394986
M5 GO Biological Process	GOBP_MYELOID_CELL_APOPTOTIC_PROCESS	44	1.59042	0.00802568	0.0394713
M5 GO Biological Process	GOBP_PROTEIN_LOCALIZATION_TO_CELL_SURFACE	72	1.59036	0.00487013	0.0394578
M5 GO Biological Process	GOBP_NEGATIVE_REGULATION_OF_SECRETION	201	1.59035	0	0.0394289
M5 GO Molecular Function	GOMF_HEPARIN_BINDING	163	1.59031	0	0.0394129
M5 GO Biological Process	GOBP_REGULATION_OF_EARLY_ENDOSOME_TO_LATE_ENDOSOME_TRANSPORT	19	1.5902	0.0197044	0.0394177
M5 GO Biological Process	GOBP_POSITIVE_REGULATION_OF_PHOSPHOLIPASE_ACTIVITY	47	1.5898	0.00990099	0.0395289
M5 GO Biological Process	GOBP_RESPONSE_TO_PAIN	45	1.58908	0.0163666	0.0397471
M2 Reactome pathway	REACTOME_DEATH_RECEPTOR_SIGNALING	139	1.58894	0.00144092	0.039763
M5 GO Biological Process	GOBP_REGULATION_OF_NON_CANONICAL_NF_KAPPAB_SIGNAL_TRANSDUCTION	98	1.5888	0.00309119	0.0397717
M2 BioCarta pathway	BIOCARTA_TNFR1_PATHWAY	28	1.5887	0.0123023	0.0397815
M5 GO Cellular Component	GOCC_COPII_VESICLE_COAT	15	1.58867	0.0236887	0.0397567
M5 GO Biological Process	GOBP_ACTIN_FILAMENT_BASED_TRANSPORT	22	1.58846	0.0198676	0.0398008
M2 BioCarta pathway	BIOCARTA_IL2RB_PATHWAY	36	1.58828	0.00854701	0.0398424
M5 GO Biological Process	GOBP_T_HELPER_CELL_LINEAGE_COMMITMENT	17	1.5881	0.0269784	0.03987
M2 BioCarta pathway	BIOCARTA_NKCELLS_PATHWAY	17	1.58798	0.0353357	0.0398823
M5 GO Biological Process	GOBP_HORMONE_METABOLIC_PROCESS	216	1.58778	0	0.0399261
M2 Reactome pathway	REACTOME_ELASTIC_FIBRE_FORMATION	38	1.58691	0.0150502	0.0401908
M5 GO Biological Process	GOBP_CELLULAR_RESPONSE_TO_REACTIVE_OXYGEN_SPECIES	141	1.58685	0	0.040178
M5 GO Biological Process	GOBP_FOCAL_ADHESION_ASSEMBLY	87	1.58639	0.00153374	0.0403165
M5 GO Biological Process	GOBP_RIBONUCLEOSIDE_CATABOLIC_PROCESS	15	1.58612	0.0189003	0.0403932
M5 GO Biological Process	GOBP_REGULATION_OF_RHO_PROTEIN_SIGNAL_TRANSDUCTION	85	1.586	0.00314465	0.0403938
M5 GO Biological Process	GOBP_ICOSANOID_TRANSPORT	65	1.58574	0.0126783	0.0404491
M5 GO Biological Process	GOBP_REGULATION_OF_PODOSOME_ASSEMBLY	16	1.58566	0.0313044	0.040447
M5 GO Molecular Function	GOMF_GLYCOLIPID_BINDING	31	1.58538	0.0135364	0.0405277
M5 GO Biological Process	GOBP_MAST_CELL_ACTIVATION_INVOLVED_IN_IMMUNE_RESPONSE	62	1.58526	0.011041	0.0405401
M2 Reactome pathway	REACTOME_P130CAS_LINKAGE_TO_MAPK_SIGNALING_FOR_INTEGRINS	15	1.58505	0.0287648	0.0405798
M5 GO Biological Process	GOBP_CD40_SIGNALING_PATHWAY	17	1.58491	0.0241636	0.0406049
M5 GO Biological Process	GOBP_REGULATION_OF_PROSTAGLANDIN_SECRETION	17	1.58486	0.0244328	0.0405934
M2 BioCarta pathway	BIOCARTA_NTHI_PATHWAY	22	1.58431	0.0213523	0.0407806
M5 GO Biological Process	GOBP_ZYMOGEN_ACTIVATION	60	1.5837	0.00455235	0.0409701
M5 GO Biological Process	GOBP_POSITIVE_REGULATION_OF_ERYTHROCYTE_DIFFERENTIATION	28	1.58313	0.0259067	0.0411446
M5 GO Molecular Function	GOMF_PHOSPHOLIPASE_BINDING	28	1.58272	0.0182119	0.0412605
M2 Reactome pathway	REACTOME_RAB_GEFS_EXCHANGE_GTP_FOR_GDP_ON_RABS	89	1.58243	0.00626959	0.0413375
M5 GO Molecular Function	GOMF_RECEPTOR_TYROSINE_KINASE_BINDING	81	1.58233	0.00931677	0.0413467
M5 GO Biological Process	GOBP_REGULATION_OF_POSITIVE_CHEMOTAXIS	26	1.58232	0.0122592	0.0413179
M5 GO Biological Process	GOBP_GMP_METABOLIC_PROCESS	23	1.58214	0.0176056	0.0413651
M2 WikiPathways pathway	WP_OXIDATIVE_STRESS_RESPONSE	28	1.58161	0.011745	0.0415286
M5 GO Biological Process	GOBP_CELLULAR_RESPONSE_TO_DSRNA	19	1.58114	0.0218121	0.0416741
M5 GO Cellular Component	GOCC_DESMOSOME	25	1.58067	0.0195035	0.0418319
M5 GO Biological Process	GOBP_RESPONSE_TO_FLUID_SHEAR_STRESS	24	1.5806	0.0101523	0.0418229
M5 GO Biological Process	GOBP_TRANSEPITHELIAL_TRANSPORT	33	1.5804	0.0137931	0.0418695
M5 GO Biological Process	GOBP_RUFFLE_ORGANIZATION	53	1.57988	0.0130933	0.0420183
M5 GO Molecular Function	GOMF_SPHINGOLIPID_TRANSPORTER_ACTIVITY	16	1.57972	0.0206186	0.0420353
M5 GO Biological Process	GOBP_SEROTONIN_TRANSPORT	30	1.57883	0.017094	0.0423283
M5 GO Biological Process	GOBP_BARBED_END_ACTIN_FILAMENT_CAPPING	26	1.57812	0.0304054	0.0425486
M5 GO Biological Process	GOBP_CELLULAR_RESPONSE_TO_ARSENIC_CONTAINING_SUBSTANCE	18	1.57794	0.024735	0.0425793
M5 GO Molecular Function	GOMF_PHOSPHOLIPID_SCRAMBLASE_ACTIVITY	21	1.57736	0.0202703	0.0427658
M2 Reactome pathway	REACTOME_PLASMA_LIPOPROTEIN_ASSEMBLY_REMODELING_AND_CLEARANCE	62	1.57728	0.0136157	0.0427654
M2 Reactome pathway	REACTOME_NUCLEOTIDE_BINDING_DOMAIN_LEUCINE_RICH_REPEAT_CONTAINING_RECEPTOR_NLR_SIGNALING_PATHWAYS	45	1.57702	0.0134003	0.0428252
M5 GO Biological Process	GOBP_MONOCYTE_CHEMOTACTIC_PROTEIN_1_PRODUCTION	30	1.57689	0.0130933	0.0428446
M5 GO Molecular Function	GOMF_WW_DOMAIN_BINDING	24	1.57634	0.020654	0.0430227
M5 GO Molecular Function	GOMF_FLAVIN_ADENINE_DINUCLEOTIDE_BINDING	89	1.57632	0.0015456	0.0429971
M2 Reactome pathway	REACTOME_DRUG_ADME	88	1.5762	0.00471698	0.0430116
M5 GO Biological Process	GOBP_IMP_METABOLIC_PROCESS	23	1.57596	0.0178571	0.0430593
M2 Reactome pathway	REACTOME_SIGNALING_BY_CSF3_G_CSF	22	1.5756	0.0392857	0.0431651
M5 GO Biological Process	GOBP_POSITIVE_REGULATION_OF_VASCULAR_ASSOCIATED_SMOOTH_MUSCLE_CELL_PROLIFERATION	43	1.5749	0.0183946	0.0433955
M5 GO Biological Process	GOBP_POST_GOLGI_VESICLE_MEDIATED_TRANSPORT	97	1.57419	0	0.0436114
M5 GO Cellular Component	GOCC_GLIAL_CELL_PROJECTION	45	1.574	0.00995025	0.0436394
M5 GO Biological Process	GOBP_LYSOSOMAL_TRANSPORT	126	1.57396	0.00737463	0.0436193
M5 GO Biological Process	GOBP_MYOBLAST_FUSION	49	1.57375	0.00475436	0.0436555
M5 GO Biological Process	GOBP_REGULATION_OF_PROTEIN_CONTAINING_COMPLEX_ASSEMBLY	425	1.57328	0	0.0438077
M5 GO Cellular Component	GOCC_PLASMA_MEMBRANE_SIGNALING_RECEPTOR_COMPLEX	182	1.57325	0.00141243	0.0437818
M5 GO Biological Process	GOBP_NEGATIVE_REGULATION_OF_CELLULAR_RESPONSE_TO_GROWTH_FACTOR_STIMULUS	105	1.57319	0.00606061	0.0437682
M2 Reactome pathway	REACTOME_SIGNALING_BY_NTRKS	75	1.57239	0.00475436	0.0440842
M2 Reactome pathway	REACTOME_RHO_GTPASE_CYCLE	419	1.57216	0	0.0441398
M5 GO Biological Process	GOBP_POSITIVE_REGULATION_OF_NITRIC_OXIDE_SYNTHASE_ACTIVITY	19	1.5707	0.0269784	0.0446458
M5 GO Molecular Function	GOMF_CYCLASE_ACTIVITY	26	1.57061	0.0213523	0.0446399
M5 GO Biological Process	GOBP_T_CELL_DIFFERENTIATION	329	1.57049	0.00129534	0.0446488
M2 BioCarta pathway	BIOCARTA_ERK_PATHWAY	25	1.57005	0.0207612	0.0447884
M5 GO Biological Process	GOBP_ORGANOPHOSPHATE_CATABOLIC_PROCESS	136	1.5691	0.00146199	0.0451539
M5 GO Biological Process	GOBP_BONE_MINERALIZATION	133	1.56903	0.00303951	0.0451369
M5 GO Biological Process	GOBP_CYTOKINETIC_PROCESS	41	1.56851	0.00837521	0.045285
M2 BioCarta pathway	BIOCARTA_CHEMICAL_PATHWAY	18	1.56851	0.0133779	0.0452507
M2 Reactome pathway	REACTOME_RAB_REGULATION_OF_TRAFFICKING	115	1.56813	0.00149254	0.0453485
M5 GO Biological Process	GOBP_GOLGI_TO_VACUOLE_TRANSPORT	21	1.56769	0.0305085	0.04546
M5 GO Cellular Component	GOCC_LYTIC_VACUOLE_MEMBRANE	219	1.56738	0.0027894	0.0455477
M2 Reactome pathway	REACTOME_OPIOID_SIGNALLING	71	1.56706	0.00492611	0.045636
M2 BioCarta pathway	BIOCARTA_KERATINOCYTE_PATHWAY	46	1.56703	0.0164474	0.045613
M5 GO Molecular Function	GOMF_HYDROLASE_ACTIVITY_ACTING_ON_CARBON_NITROGEN_BUT_NOT_PEPTIDE_BONDS_IN_CYCLIC_AMIDINES	29	1.56641	0.0239316	0.0458098
M5 GO Biological Process	GOBP_TUMOR_NECROSIS_FACTOR_MEDIATED_SIGNALING_PATHWAY	80	1.56632	0.00464396	0.0458079
M5 GO Cellular Component	GOCC_RECEPTOR_COMPLEX	396	1.56512	0	0.0462569
M5 GO Biological Process	GOBP_RESPONSE_TO_OSMOTIC_STRESS	83	1.56502	0.0015674	0.0462621
M5 GO Biological Process	GOBP_PROTEIN_LOCALIZATION_TO_GOLGI_APPARATUS	30	1.56474	0.0209677	0.046342
M5 GO Molecular Function	GOMF_PHOSPHATIDYLINOSITOL_4_5_BISPHOSPHATE_BINDING	93	1.56459	0.00453858	0.0463651
M2 Reactome pathway	REACTOME_ERK_MAPK_TARGETS	19	1.56446	0.0212389	0.0463783
M5 GO Cellular Component	GOCC_FILOPODIUM_MEMBRANE	17	1.56373	0.0328152	0.04664
M5 GO Biological Process	GOBP_SMOOTH_MUSCLE_CONTRACTION	118	1.56348	0.00455235	0.0467097
M5 GO Biological Process	GOBP_ENDODERM_FORMATION	41	1.56265	0.0197044	0.0470082
M5 GO Molecular Function	GOMF_PHOSPHOLIPID_TRANSPORTER_ACTIVITY	64	1.56249	0.00643087	0.0470339
M5 GO Biological Process	GOBP_REGULATION_OF_GRANULOCYTE_DIFFERENTIATION	20	1.5622	0.0164745	0.0471194
M5 GO Molecular Function	GOMF_TUMOR_NECROSIS_FACTOR_RECEPTOR_SUPERFAMILY_BINDING	48	1.56204	0.0144695	0.0471595
M5 GO Biological Process	GOBP_GERMINAL_CENTER_FORMATION	16	1.56096	0.0282862	0.0475574
M5 GO Biological Process	GOBP_PROTEIN_LOCALIZATION_TO_LYSOSOME	55	1.56086	0.0146341	0.0475551
M5 GO Biological Process	GOBP_RESPONSE_TO_UNFOLDED_PROTEIN	109	1.55983	0.00449102	0.0479406
M5 GO Biological Process	GOBP_CD8_POSITIVE_ALPHA_BETA_T_CELL_DIFFERENTIATION	22	1.5595	0.0246479	0.0480291
M5 GO Biological Process	GOBP_POSITIVE_REGULATION_OF_TYPE_I_INTERFERON_MEDIATED_SIGNALING_PATHWAY	21	1.55944	0.0324232	0.0480167
M5 GO Biological Process	GOBP_COPII_COATED_VESICLE_BUDDING	36	1.55869	0.0129241	0.0482744
M5 GO Biological Process	GOBP_AMYLOID_PRECURSOR_PROTEIN_METABOLIC_PROCESS	76	1.55784	0.00322581	0.0486113
M5 GO Biological Process	GOBP_REGULATION_OF_CELLULAR_RESPONSE_TO_GROWTH_FACTOR_STIMULUS	320	1.55757	0	0.048684
M5 GO Biological Process	GOBP_REGULATION_OF_ACTIN_FILAMENT_ORGANIZATION	271	1.55752	0	0.0486792
M5 GO Biological Process	GOBP_REGULATION_OF_ACTIN_FILAMENT_LENGTH	163	1.5575	0	0.0486471
M5 GO Biological Process	GOBP_VESICLE_TARGETING_TO_FROM_OR_WITHIN_GOLGI	29	1.55673	0.0281457	0.0489226
M5 GO Biological Process	GOBP_RIBONUCLEOSIDE_MONOPHOSPHATE_BIOSYNTHETIC_PROCESS	33	1.55639	0.0215947	0.0490323
M5 GO Biological Process	GOBP_REGULATION_OF_ENDOPLASMIC_RETICULUM_STRESS_INDUCED_INTRINSIC_APOPTOTIC_SIGNALING_PATHWAY	31	1.55581	0.0119863	0.0492562
M5 GO Biological Process	GOBP_TOLL_LIKE_RECEPTOR_9_SIGNALING_PATHWAY	16	1.5556	0.0359066	0.0493064
M5 GO Biological Process	GOBP_NEGATIVE_REGULATION_OF_INTERLEUKIN_1_PRODUCTION	38	1.55554	0.0242718	0.0492972
M5 GO Biological Process	GOBP_PURINE_RIBONUCLEOTIDE_CATABOLIC_PROCESS	38	1.55537	0.0120069	0.0493305
M5 GO Biological Process	GOBP_NEGATIVE_REGULATION_OF_INTERLEUKIN_1_BETA_PRODUCTION	31	1.55487	0.0166667	0.0495197
M5 GO Biological Process	GOBP_PROTEIN_LOCALIZATION_TO_ENDOPLASMIC_RETICULUM	75	1.55426	0.00597015	0.0497403
M5 GO Biological Process	GOBP_NUCLEOSIDE_PHOSPHATE_CATABOLIC_PROCESS	75	1.55411	0.0046875	0.0497628
M5 GO Cellular Component	GOCC_PROTEIN_LIPID_COMPLEX	45	1.55278	0.0176282	0.0503309
M5 GO Biological Process	GOBP_REGULATION_OF_PROTEIN_LOCALIZATION_TO_NUCLEUS	159	1.55264	0	0.0503703
M5 GO Biological Process	GOBP_REGULATION_OF_LYMPHOCYTE_DIFFERENTIATION	217	1.5526	0	0.0503436
M5 GO Biological Process	GOBP_POSITIVE_REGULATION_OF_ALCOHOL_BIOSYNTHETIC_PROCESS	29	1.55232	0.0135364	0.0504109
M5 GO Biological Process	GOBP_REGULATION_OF_ALCOHOL_BIOSYNTHETIC_PROCESS	52	1.55231	0.0116861	0.0503755
M5 GO Cellular Component	GOCC_CYTOPLASMIC_SIDE_OF_PLASMA_MEMBRANE	177	1.5522	0	0.0504069
M5 GO Biological Process	GOBP_CELLULAR_RESPONSE_TO_DEXAMETHASONE_STIMULUS	23	1.55177	0.0252765	0.0505431
M5 GO Biological Process	GOBP_NUCLEOBASE_METABOLIC_PROCESS	40	1.55164	0.0148026	0.0505601
M5 GO Biological Process	GOBP_NEGATIVE_REGULATION_OF_DEFENSE_RESPONSE_TO_VIRUS	49	1.55147	0.0127186	0.0505984
M5 GO Biological Process	GOBP_POSITIVE_REGULATION_OF_COAGULATION	29	1.5512	0.0315615	0.0506883
M5 GO Biological Process	GOBP_URONIC_ACID_METABOLIC_PROCESS	15	1.5512	0.0399274	0.0506512
M5 GO Biological Process	GOBP_INTRINSIC_APOPTOTIC_SIGNALING_PATHWAY	323	1.55058	0	0.0508946
M2 Reactome pathway	REACTOME_CLATHRIN_MEDIATED_ENDOCYTOSIS	140	1.54978	0.00148368	0.051184
M5 GO Molecular Function	GOMF_HYDROLASE_ACTIVITY_HYDROLYZING_O_GLYCOSYL_COMPOUNDS	89	1.5492	0.0015456	0.051387
M5 GO Biological Process	GOBP_REGULATION_OF_INTRINSIC_APOPTOTIC_SIGNALING_PATHWAY	191	1.54808	0	0.0518058
M5 GO Biological Process	GOBP_GLOMERULAR_EPITHELIUM_DEVELOPMENT	18	1.54755	0.0371622	0.0519973
M5 GO Biological Process	GOBP_INTRACELLULAR_STEROL_TRANSPORT	33	1.54736	0.0137221	0.052043
M5 GO Cellular Component	GOCC_TRANS_GOLGI_NETWORK_TRANSPORT_VESICLE	36	1.54722	0.0303541	0.0520664
M2 Reactome pathway	REACTOME_NEGATIVE_REGULATION_OF_MET_ACTIVITY	21	1.54703	0.0261011	0.0521058
M5 GO Biological Process	GOBP_HEMOGLOBIN_METABOLIC_PROCESS	21	1.54694	0.0269784	0.0521144
M5 GO Biological Process	GOBP_MACROAUTOPHAGY	265	1.54568	0.00134771	0.0526265
M5 GO Biological Process	GOBP_POSITIVE_REGULATION_OF_TRANSCRIPTION_FROM_RNA_POLYMERASE_II_PROMOTER_IN_RESPONSE_TO_STRESS	20	1.54526	0.0262697	0.0527742
M5 GO Biological Process	GOBP_POSITIVE_REGULATION_OF_MONOOXYGENASE_ACTIVITY	29	1.54493	0.024055	0.0528631
M5 GO Biological Process	GOBP_RECEPTOR_CATABOLIC_PROCESS	31	1.54415	0.0169205	0.0531818
M5 GO Biological Process	GOBP_CD4_POSITIVE_ALPHA_BETA_T_CELL_DIFFERENTIATION	96	1.54366	0.00765697	0.0533304
M5 GO Biological Process	GOBP_POSITIVE_REGULATION_OF_LYMPHOCYTE_DIFFERENTIATION	136	1.54346	0.00435414	0.0533914
M5 GO Biological Process	GOBP_POSITIVE_REGULATION_OF_JUN_KINASE_ACTIVITY	55	1.54341	0.0146819	0.0533755
M5 GO Molecular Function	GOMF_ADENYLYLTRANSFERASE_ACTIVITY	35	1.54324	0.0118243	0.0534034
M5 GO Molecular Function	GOMF_CHEMOATTRACTANT_ACTIVITY	37	1.54249	0.0231405	0.0537063
M2 Reactome pathway	REACTOME_SIGNALING_BY_EGFR	46	1.54249	0.0231405	0.05367
M5 GO Molecular Function	GOMF_FLIPPASE_ACTIVITY	17	1.54165	0.0332168	0.0539833
M5 GO Biological Process	GOBP_MYELOID_CELL_DEVELOPMENT	93	1.54143	0.0107362	0.0540301
M2 Reactome pathway	REACTOME_METABOLISM_OF_CARBOHYDRATES	265	1.5409	0	0.0542461
M5 GO Biological Process	GOBP_VACUOLAR_ACIDIFICATION	25	1.54041	0.0169779	0.0544406
M2 Reactome pathway	REACTOME_SIGNAL_TRANSDUCTION_BY_L1	19	1.54032	0.04	0.0544342
M5 GO Cellular Component	GOCC_LAMELLIPODIUM	179	1.54001	0	0.0545296
M5 GO Biological Process	GOBP_NEGATIVE_REGULATION_OF_HOMOTYPIC_CELL_CELL_ADHESION	15	1.53958	0.0395189	0.0546768
M5 GO Biological Process	GOBP_POSITIVE_REGULATION_OF_MAST_CELL_ACTIVATION_INVOLVED_IN_IMMUNE_RESPONSE	22	1.53899	0.0266667	0.0549139
M5 GO Cellular Component	GOCC_AUTOPHAGOSOME	90	1.53898	0.00930233	0.0548792
M5 GO Biological Process	GOBP_SMAD_PROTEIN_SIGNAL_TRANSDUCTION	82	1.53889	0.0116861	0.0548748
M5 GO Biological Process	GOBP_NEGATIVE_REGULATION_OF_RECEPTOR_SIGNALING_PATHWAY_VIA_STAT	30	1.53754	0.0151515	0.0554389
M5 GO Biological Process	GOBP_MIDBODY_ABSCISSION	16	1.53682	0.0369718	0.0557284
M5 GO Biological Process	GOBP_GTP_METABOLIC_PROCESS	26	1.53646	0.0242718	0.0558536
M5 GO Biological Process	GOBP_PROCESS_UTILIZING_AUTOPHAGIC_MECHANISM	492	1.53595	0	0.0560502
M5 GO Biological Process	GOBP_GLYCOSPHINGOLIPID_METABOLIC_PROCESS	51	1.53507	0.0180328	0.0564059
M5 GO Biological Process	GOBP_REGULATION_OF_SMAD_PROTEIN_SIGNAL_TRANSDUCTION	44	1.53503	0.0247678	0.0563796
M5 GO Molecular Function	GOMF_METALLOCARBOXYPEPTIDASE_ACTIVITY	26	1.53471	0.0272109	0.0565007
MH Hallmark	HALLMARK_ANDROGEN_RESPONSE	95	1.53448	0.00623053	0.0565561
M5 GO Biological Process	GOBP_EOSINOPHIL_CHEMOTAXIS	21	1.53371	0.0345423	0.0568664
M2 Reactome pathway	REACTOME_NERVOUS_SYSTEM_DEVELOPMENT	260	1.5337	0	0.0568367
M5 GO Biological Process	GOBP_HOMEOSTASIS_OF_NUMBER_OF_CELLS	381	1.53345	0	0.0569095
M5 GO Biological Process	GOBP_CELL_CELL_JUNCTION_ORGANIZATION	211	1.53297	0	0.0570997
M5 GO Biological Process	GOBP_NUCLEOBASE_CONTAINING_SMALL_MOLECULE_CATABOLIC_PROCESS	25	1.53265	0.0245098	0.0571936
M5 GO Biological Process	GOBP_NEGATIVE_REGULATION_OF_G_PROTEIN_COUPLED_RECEPTOR_SIGNALING_PATHWAY	63	1.53171	0.0096	0.0575722
M5 GO Biological Process	GOBP_RESPONSE_TO_PROSTAGLANDIN_E	19	1.53107	0.0337838	0.0578437
M5 GO Biological Process	GOBP_NEGATIVE_REGULATION_OF_PROTEIN_LOCALIZATION_TO_CELL_PERIPHERY	30	1.53063	0.0317726	0.058021
M5 GO Biological Process	GOBP_REGULATION_OF_ACTIN_FILAMENT_BASED_PROCESS	389	1.53055	0	0.0580275
M5 GO Biological Process	GOBP_POSITIVE_REGULATION_OF_B_CELL_ACTIVATION	88	1.53055	0.00941915	0.0579872
M5 GO Biological Process	GOBP_NEGATIVE_REGULATION_OF_PROTEIN_LOCALIZATION_TO_NUCLEUS	44	1.53048	0.00950872	0.0579693
M5 GO Cellular Component	GOCC_GTPASE_COMPLEX	39	1.53019	0.0291096	0.0580729
M2 Reactome pathway	REACTOME_MYD88_MAL_TIRAP_CASCADE_INITIATED_ON_PLASMA_MEMBRANE	83	1.53018	0.0123839	0.058035
M5 GO Biological Process	GOBP_REGULATION_OF_EXTRINSIC_APOPTOTIC_SIGNALING_PATHWAY	169	1.52997	0.0014771	0.0580866
M5 GO Biological Process	GOBP_CHONDROITIN_SULFATE_METABOLIC_PROCESS	26	1.52958	0.0184874	0.0582494
M2 Reactome pathway	REACTOME_CLASS_B_2_SECRETIN_FAMILY_RECEPTORS	50	1.52893	0.0206349	0.0585379
M5 GO Molecular Function	GOMF_PHOSPHATIDYLINOSITOL_5_PHOSPHATE_BINDING	22	1.52856	0.025641	0.0586544
M5 GO Molecular Function	GOMF_ICOSANOID_RECEPTOR_ACTIVITY	16	1.52838	0.0234899	0.0586946
M5 GO Biological Process	GOBP_REGULATION_OF_VACUOLE_ORGANIZATION	55	1.52815	0.0127389	0.058759
M2 BioCarta pathway	BIOCARTA_GCR_PATHWAY	16	1.52804	0.0331126	0.0587702
M5 GO Molecular Function	GOMF_SERINE_TYPE_ENDOPEPTIDASE_INHIBITOR_ACTIVITY	110	1.52778	0.00294551	0.058849
M5 GO Biological Process	GOBP_ZINC_ION_TRANSPORT	30	1.52733	0.0222603	0.0590173
M5 GO Cellular Component	GOCC_FILOPODIUM	99	1.52729	0	0.0589904
M5 GO Biological Process	GOBP_ALPHA_BETA_T_CELL_DIFFERENTIATION	134	1.52704	0.00291545	0.0590726
M5 GO Molecular Function	GOMF_G_PROTEIN_BETA_SUBUNIT_BINDING	23	1.52697	0.0477002	0.0590691
M5 GO Biological Process	GOBP_RESPONSE_TO_NITRIC_OXIDE	17	1.52675	0.049236	0.05913
M5 GO Biological Process	GOBP_NEGATIVE_REGULATION_OF_CELL_MATRIX_ADHESION	37	1.52648	0.0210356	0.0592085
M5 GO Biological Process	GOBP_NUCLEOSIDE_CATABOLIC_PROCESS	21	1.5254	0.0328152	0.0597098
M5 GO Biological Process	GOBP_REGULATION_OF_EPITHELIAL_CELL_PROLIFERATION	412	1.5252	0	0.0597625
M5 GO Biological Process	GOBP_RESPONSE_TO_ANGIOTENSIN	32	1.52512	0.0180328	0.059763
M5 GO Biological Process	GOBP_CELLULAR_RESPONSE_TO_CORTICOSTEROID_STIMULUS	58	1.52429	0.0111465	0.0601241
M5 GO Biological Process	GOBP_VESICLE_ORGANIZATION	354	1.52385	0	0.0603
M5 GO Biological Process	GOBP_KILLING_BY_HOST_OF_SYMBIONT_CELLS	22	1.52367	0.0417423	0.0603484
M5 GO Molecular Function	GOMF_PROTEIN_PHOSPHATASE_BINDING	179	1.52284	0.00144928	0.0607165
M5 GO Biological Process	GOBP_ADENYLATE_CYCLASE_MODULATING_G_PROTEIN_COUPLED_RECEPTOR_SIGNALING_PATHWAY	222	1.52277	0	0.0606962
M5 GO Biological Process	GOBP_CARBOHYDRATE_TRANSPORT	150	1.5226	0.00290698	0.0607338
M5 GO Biological Process	GOBP_COLLAGEN_BIOSYNTHETIC_PROCESS	65	1.52153	0.00955414	0.0612046
M5 GO Cellular Component	GOCC_PLATELET_ALPHA_GRANULE	20	1.52129	0.0326461	0.061271
M5 GO Biological Process	GOBP_RESPONSE_TO_TOPOLOGICALLY_INCORRECT_PROTEIN	132	1.52058	0.00298954	0.0615901
M5 GO Cellular Component	GOCC_EXTRINSIC_COMPONENT_OF_MEMBRANE	222	1.5203	0.0027248	0.0616869
M5 GO Biological Process	GOBP_PEPTIDE_CROSS_LINKING	33	1.52008	0.016835	0.0617543
M5 GO Molecular Function	GOMF_HYDROLASE_ACTIVITY_ACTING_ON_GLYCOSYL_BONDS	124	1.52004	0.00718391	0.0617318
M5 GO Biological Process	GOBP_ENDODERMAL_CELL_DIFFERENTIATION	31	1.51961	0.0342466	0.061921
M5 GO Biological Process	GOBP_POSITIVE_REGULATION_OF_EPITHELIAL_CELL_PROLIFERATION	226	1.51922	0.0013947	0.0620479
M5 GO Biological Process	GOBP_PURINE_RIBONUCLEOTIDE_SALVAGE	16	1.51912	0.0428816	0.0620507
M5 GO Molecular Function	GOMF_G_PROTEIN_COUPLED_RECEPTOR_BINDING	298	1.51879	0	0.0621563
M5 GO Biological Process	GOBP_POSITIVE_REGULATION_OF_LIPID_METABOLIC_PROCESS	170	1.51679	0.00284495	0.0631765
M5 GO Cellular Component	GOCC_CIS_GOLGI_NETWORK	57	1.51613	0.0152207	0.0634623
M5 GO Biological Process	GOBP_PLATELET_DENSE_GRANULE_ORGANIZATION	21	1.51595	0.0473773	0.0635096
M5 GO Biological Process	GOBP_POSITIVE_REGULATION_OF_RECEPTOR_INTERNALIZATION	35	1.51594	0.0352941	0.063466
M2 Reactome pathway	REACTOME_APOPTOTIC_CLEAVAGE_OF_CELLULAR_PROTEINS	37	1.51517	0.0201342	0.0637866
M5 GO Biological Process	GOBP_AMINOGLYCAN_CATABOLIC_PROCESS	37	1.51481	0.0204778	0.0639323
M5 GO Biological Process	GOBP_PROTEIN_NITROSYLATION	15	1.51454	0.0476191	0.0640371
M5 GO Biological Process	GOBP_G_PROTEIN_COUPLED_RECEPTOR_SIGNALING_PATHWAY_INVOLVED_IN_HEART_PROCESS	16	1.5144	0.0310345	0.0640683
M5 GO Biological Process	GOBP_MELANOSOME_ASSEMBLY	19	1.51435	0.0243506	0.0640445
M5 GO Biological Process	GOBP_REGULATION_OF_FATTY_ACID_BIOSYNTHETIC_PROCESS	50	1.51429	0.0144	0.0640326
M5 GO Biological Process	GOBP_GLYCOSAMINOGLYCAN_CATABOLIC_PROCESS	28	1.51413	0.0213904	0.064074
M5 GO Biological Process	GOBP_INTERLEUKIN_5_PRODUCTION	20	1.5138	0.0320285	0.0642114
M5 GO Biological Process	GOBP_REGULATION_OF_RECEPTOR_MEDIATED_ENDOCYTOSIS	129	1.5137	0.00298063	0.0642193
M5 GO Biological Process	GOBP_VESICLE_TARGETING	60	1.51325	0.0143541	0.0644187
M2 Reactome pathway	REACTOME_ANTIGEN_ACTIVATES_B_CELL_RECEPTOR_BCR_LEADING_TO_GENERATION_OF_SECOND_MESSENGERS	24	1.51321	0.0344234	0.0643954
M5 GO Biological Process	GOBP_REGULATION_OF_HORMONE_BIOSYNTHETIC_PROCESS	29	1.51313	0.0224719	0.0643848
M2 Reactome pathway	REACTOME_REGULATION_OF_TLR_BY_ENDOGENOUS_LIGAND	19	1.51302	0.0420875	0.0643955
M5 GO Biological Process	GOBP_POSITIVE_REGULATION_OF_SMAD_PROTEIN_SIGNAL_TRANSDUCTION	26	1.51246	0.0390879	0.0646362
M5 GO Biological Process	GOBP_TRANSMEMBRANE_RECEPTOR_PROTEIN_SERINE_THREONINE_KINASE_SIGNALING_PATHWAY	374	1.51202	0	0.0648178
M5 GO Biological Process	GOBP_SIGNALING_RECEPTOR_LIGAND_PRECURSOR_PROCESSING	29	1.51193	0.0402685	0.0648134
M5 GO Biological Process	GOBP_GLOMERULUS_DEVELOPMENT	66	1.51173	0.0122888	0.0648642
M5 GO Biological Process	GOBP_NEGATIVE_REGULATION_OF_PLATELET_ACTIVATION	15	1.5117	0.0340502	0.0648312
M2 Reactome pathway	REACTOME_RHOQ_GTPASE_CYCLE	58	1.51125	0.0213465	0.0650166
M2 Reactome pathway	REACTOME_NOD1_2_SIGNALING_PATHWAY	31	1.50952	0.0322581	0.0658908
M5 GO Biological Process	GOBP_ENDOSOMAL_TRANSPORT	236	1.5092	0	0.0660186
M2 Reactome pathway	REACTOME_VASOPRESSIN_REGULATES_RENAL_WATER_HOMEOSTASIS_VIA_AQUAPORINS	31	1.50909	0.0344234	0.0660296
M5 GO Biological Process	GOBP_REGULATION_OF_WNT_SIGNALING_PATHWAY_PLANAR_CELL_POLARITY_PATHWAY	15	1.50861	0.0506329	0.066248
M5 GO Biological Process	GOBP_REGULATION_OF_AMYLOID_BETA_CLEARANCE	18	1.50836	0.0464716	0.0663415
M5 GO Biological Process	GOBP_NEGATIVE_REGULATION_OF_PROTEIN_MODIFICATION_PROCESS	458	1.50794	0	0.06653
M5 GO Biological Process	GOBP_STEROID_CATABOLIC_PROCESS	23	1.50785	0.0394511	0.0665318
M5 GO Biological Process	GOBP_VESICLE_TETHERING	31	1.50779	0.0334507	0.0665154
M2 Reactome pathway	REACTOME_DEFENSINS	16	1.50774	0.0480427	0.0664896
MH Hallmark	HALLMARK_TGF_BETA_SIGNALING	53	1.50763	0.0276074	0.0665011
M5 GO Molecular Function	GOMF_NADPLUS_BINDING	16	1.50638	0.0457038	0.0671069
M5 GO Biological Process	GOBP_EPITHELIAL_CELL_PROLIFERATION	496	1.50558	0	0.0675078
M5 GO Biological Process	GOBP_NEGATIVE_REGULATION_OF_PHOSPHORUS_METABOLIC_PROCESS	417	1.50541	0	0.0675518
M5 GO Biological Process	GOBP_REGULATION_OF_T_CELL_APOPTOTIC_PROCESS	50	1.50525	0.0149007	0.0675989
M5 GO Biological Process	GOBP_ANTIBACTERIAL_HUMORAL_RESPONSE	63	1.50509	0.0238095	0.0676342
M5 GO Biological Process	GOBP_PURINE_CONTAINING_COMPOUND_CATABOLIC_PROCESS	55	1.50486	0.0162602	0.0677102
M5 GO Biological Process	GOBP_B_CELL_APOPTOTIC_PROCESS	30	1.50453	0.0416667	0.0678225
M5 GO Molecular Function	GOMF_HISTONE_KINASE_ACTIVITY	24	1.5045	0.0364299	0.0678017
M5 GO Biological Process	GOBP_POSITIVE_REGULATION_OF_T_CELL_APOPTOTIC_PROCESS	16	1.50442	0.0354132	0.0678056
M5 GO Biological Process	GOBP_REGULATION_OF_SMOOTH_MUSCLE_CONTRACTION	69	1.50426	0.00620155	0.0678545
M5 GO Biological Process	GOBP_SUPPRESSION_OF_VIRAL_RELEASE_BY_HOST	22	1.50409	0.038983	0.067907
M5 GO Biological Process	GOBP_REGULATION_OF_AMINO_ACID_TRANSMEMBRANE_TRANSPORT	19	1.50384	0.0386643	0.0679902
M5 GO Biological Process	GOBP_GLYCEROPHOSPHOLIPID_CATABOLIC_PROCESS	34	1.50371	0.0204429	0.0680121
M2 Reactome pathway	REACTOME_SYNTHESIS_OF_IP3_AND_IP4_IN_THE_CYTOSOL	28	1.50347	0.0319328	0.0680948
M5 GO Cellular Component	GOCC_RUFFLE_MEMBRANE	75	1.50299	0.00952381	0.0683225
M5 GO Molecular Function	GOMF_LIPOPROTEIN_PARTICLE_RECEPTOR_ACTIVITY	17	1.50223	0.0609756	0.0686596
M5 GO Biological Process	GOBP_POSITIVE_REGULATION_OF_IMMUNOGLOBULIN_PRODUCTION	70	1.5021	0.0206022	0.0686737
M5 GO Cellular Component	GOCC_RECYCLING_ENDOSOME_MEMBRANE	62	1.50189	0.0203125	0.0687484
M2 BioCarta pathway	BIOCARTA_HCMV_PATHWAY	17	1.50157	0.0495727	0.0688734
M5 GO Molecular Function	GOMF_CARBOXYPEPTIDASE_ACTIVITY	41	1.50156	0.0225443	0.0688305
M2 BioCarta pathway	BIOCARTA_HIVNEF_PATHWAY	54	1.50148	0.0176849	0.0688358
M5 GO Molecular Function	GOMF_PROTEIN_TYROSINE_KINASE_ACTIVITY	133	1.50105	0.00590842	0.0690182
M5 GO Biological Process	GOBP_ICOSANOID_BIOSYNTHETIC_PROCESS	44	1.50067	0.0254777	0.0691845
M5 GO Biological Process	GOBP_REGULATION_OF_LAMELLIPODIUM_ASSEMBLY	41	1.50044	0.031405	0.0692449
M2 Reactome pathway	REACTOME_METABOLISM_OF_WATER_SOLUBLE_VITAMINS_AND_COFACTORS	111	1.5003	0.00742942	0.0692736
M2 Reactome pathway	REACTOME_ROLE_OF_PHOSPHOLIPIDS_IN_PHAGOCYTOSIS	22	1.50021	0.0428816	0.0692809
M5 GO Cellular Component	GOCC_CAVEOLA	98	1.50006	0.00914634	0.0693247
M5 GO Biological Process	GOBP_REGULATION_OF_STRESS_ACTIVATED_PROTEIN_KINASE_SIGNALING_CASCADE	201	1.50004	0	0.069286
M5 GO Biological Process	GOBP_NEGATIVE_REGULATION_OF_KINASE_ACTIVITY	220	1.49973	0.00273973	0.0694042
M5 GO Biological Process	GOBP_ENDOCRINE_HORMONE_SECRETION	66	1.49949	0.022187	0.0694937
M5 GO Biological Process	GOBP_REGULATION_OF_RESPONSE_TO_ENDOPLASMIC_RETICULUM_STRESS	77	1.49921	0.0138675	0.0696122
M2 WikiPathways pathway	WP_LEPTIN_INSULIN_SIGNALING_OVERLAP	17	1.49888	0.0470588	0.0697426
M2 BioCarta pathway	BIOCARTA_STRESS_PATHWAY	24	1.49864	0.0369069	0.0698379
M5 GO Molecular Function	GOMF_ACETYLCHOLINE_RECEPTOR_BINDING	22	1.4985	0.0324324	0.0698592
M2 WikiPathways pathway	WP_MYOMETRIAL_RELAXATION_AND_CONTRACTION_PATHWAYS	146	1.49842	0.00295858	0.0698559
M5 GO Biological Process	GOBP_POSITIVE_REGULATION_OF_PROTEIN_LOCALIZATION_TO_NUCLEUS	99	1.49639	0.0015456	0.0709238
M5 GO Biological Process	GOBP_NEGATIVE_REGULATION_OF_TRANSPORT	500	1.49611	0.00123762	0.0710416
M5 GO Biological Process	GOBP_RIBONUCLEOSIDE_MONOPHOSPHATE_METABOLIC_PROCESS	52	1.49605	0.0223642	0.071019
M5 GO Biological Process	GOBP_EXOCYTOSIS	380	1.49581	0	0.0710956
M5 GO Biological Process	GOBP_OVULATION_CYCLE	66	1.49543	0.0172684	0.0712494
M2 Reactome pathway	REACTOME_SYNTHESIS_OF_PIPS_AT_THE_GOLGI_MEMBRANE	17	1.49474	0.0434783	0.0715689
M5 GO Biological Process	GOBP_RENAL_SYSTEM_VASCULATURE_DEVELOPMENT	27	1.49448	0.0404218	0.071684
M5 GO Biological Process	GOBP_REGULATION_OF_JUN_KINASE_ACTIVITY	72	1.49407	0.00972447	0.0718661
M2 BioCarta pathway	BIOCARTA_P38MAPK_PATHWAY	32	1.49335	0.0357751	0.0722318
M5 GO Biological Process	GOBP_NEGATIVE_REGULATION_OF_MYELOID_CELL_DIFFERENTIATION	91	1.49241	0.00895522	0.0727078
M5 GO Biological Process	GOBP_NEGATIVE_REGULATION_OF_CELL_SUBSTRATE_JUNCTION_ORGANIZATION	16	1.49203	0.0330882	0.0728734
M5 GO Biological Process	GOBP_HORMONE_BIOSYNTHETIC_PROCESS	56	1.49181	0.0176565	0.0729588
M2 Reactome pathway	REACTOME_TRANSPORT_TO_THE_GOLGI_AND_SUBSEQUENT_MODIFICATION	174	1.4918	0.00295421	0.0729133
MH Hallmark	HALLMARK_PI3K_AKT_MTOR_SIGNALING	104	1.49148	0.00434783	0.073058
M5 GO Biological Process	GOBP_RESPONSE_TO_EXTRACELLULAR_STIMULUS	416	1.49114	0	0.0732031
M5 GO Molecular Function	GOMF_PROTEIN_SERINE_THREONINE_KINASE_ACTIVATOR_ACTIVITY	63	1.491	0.0188088	0.073233
M2 BioCarta pathway	BIOCARTA_IL2_PATHWAY	23	1.49056	0.037225	0.0734557
M5 GO Biological Process	GOBP_REGULATION_OF_SYSTEMIC_ARTERIAL_BLOOD_PRESSURE_BY_RENIN_ANGIOTENSIN	29	1.49049	0.0529915	0.0734396
M2 BioCarta pathway	BIOCARTA_MTOR_PATHWAY	19	1.49045	0.059754	0.0734137
M5 GO Biological Process	GOBP_DETECTION_OF_MECHANICAL_STIMULUS_INVOLVED_IN_SENSORY_PERCEPTION_OF_PAIN	25	1.48925	0.0433333	0.0740515
M5 GO Biological Process	GOBP_POSITIVE_REGULATION_OF_JNK_CASCADE	94	1.4889	0.0109204	0.0741948
M5 GO Biological Process	GOBP_POSITIVE_REGULATION_OF_LIPASE_ACTIVITY	58	1.48883	0.023622	0.0741797
M5 GO Molecular Function	GOMF_G_PROTEIN_ALPHA_SUBUNIT_BINDING	42	1.48862	0.0387205	0.0742417
M5 GO Biological Process	GOBP_REGULATION_OF_CELLULAR_PH	89	1.48836	0.0182927	0.0743678
M5 GO Biological Process	GOBP_NEGATIVE_REGULATION_OF_TRANSFERASE_ACTIVITY	253	1.48827	0	0.0743693
M5 GO Biological Process	GOBP_REGULATION_OF_PROTEIN_MATURATION	72	1.48824	0.00630915	0.0743367
M5 GO Biological Process	GOBP_ESTABLISHMENT_OF_PIGMENT_GRANULE_LOCALIZATION	17	1.48819	0.0490368	0.0743167
M5 GO Cellular Component	GOCC_CYTOPLASMIC_SIDE_OF_MEMBRANE	208	1.48787	0.00275482	0.0744505
M5 GO Biological Process	GOBP_POSITIVE_REGULATION_OF_RUFFLE_ASSEMBLY	15	1.48763	0.0497427	0.0745464
M5 GO Biological Process	GOBP_FIBRINOLYSIS	22	1.48757	0.0372881	0.0745402
M5 GO Biological Process	GOBP_POSITIVE_REGULATION_OF_TYPE_2_IMMUNE_RESPONSE	18	1.48734	0.044293	0.0746327
M5 GO Cellular Component	GOCC_ENDOPLASMIC_RETICULUM_GOLGI_INTERMEDIATE_COMPARTMENT_MEMBRANE	17	1.48711	0.0451389	0.0747151
M5 GO Molecular Function	GOMF_PHOSPHATIDYLINOSITOL_PHOSPHATE_PHOSPHATASE_ACTIVITY	27	1.48642	0.0378657	0.0750646
M5 GO Biological Process	GOBP_MEGAKARYOCYTE_DEVELOPMENT	26	1.48634	0.0561983	0.0750693
M5 GO Biological Process	GOBP_STRESS_ACTIVATED_PROTEIN_KINASE_SIGNALING_CASCADE	253	1.4863	0	0.0750419
M5 GO Biological Process	GOBP_POSITIVE_REGULATION_OF_SMALL_GTPASE_MEDIATED_SIGNAL_TRANSDUCTION	79	1.48627	0.0136364	0.0750089
M5 GO Biological Process	GOBP_POSITIVE_REGULATION_OF_AMYLOID_BETA_FORMATION	20	1.48597	0.0446735	0.0751305
M5 GO Biological Process	GOBP_I_KAPPAB_PHOSPHORYLATION	19	1.48563	0.0446735	0.0752894
M5 GO Biological Process	GOBP_RECEPTOR_METABOLIC_PROCESS	85	1.48432	0.0107858	0.0760183
M5 GO Biological Process	GOBP_NEGATIVE_REGULATION_OF_BLOOD_VESSEL_ENDOTHELIAL_CELL_MIGRATION	35	1.48388	0.02443	0.0762273
M2 Reactome pathway	REACTOME_CARGO_CONCENTRATION_IN_THE_ER	33	1.48379	0.038835	0.0762312
M5 GO Cellular Component	GOCC_LATE_ENDOSOME_MEMBRANE	91	1.48341	0.0135542	0.0764043
M5 GO Biological Process	GOBP_NEGATIVE_REGULATION_OF_PROTEOLYSIS	326	1.48338	0	0.0763727
M5 GO Biological Process	GOBP_PEPTIDYL_TYROSINE_DEPHOSPHORYLATION	32	1.48311	0.0413907	0.0764805
M5 GO Biological Process	GOBP_CORTICAL_CYTOSKELETON_ORGANIZATION	53	1.48228	0.0394322	0.0769618
M5 GO Biological Process	GOBP_POSITIVE_REGULATION_OF_RELEASE_OF_SEQUESTERED_CALCIUM_ION_INTO_CYTOSOL	41	1.48216	0.0219595	0.076988
M5 GO Cellular Component	GOCC_MHC_CLASS_I_PROTEIN_COMPLEX	16	1.48209	0.0509091	0.0769817
M5 GO Biological Process	GOBP_RESPONSE_TO_DEXAMETHASONE	28	1.48149	0.0512821	0.0772998
M2 Reactome pathway	REACTOME_NUCLEAR_EVENTS_KINASE_AND_TRANSCRIPTION_FACTOR_ACTIVATION	27	1.48139	0.0327332	0.077312
M5 GO Biological Process	GOBP_MULTICELLULAR_ORGANISMAL_LEVEL_IRON_ION_HOMEOSTASIS	30	1.48114	0.0326264	0.0774056
M5 GO Biological Process	GOBP_NEGATIVE_REGULATION_OF_PROTEIN_MATURATION	29	1.4807	0.0480929	0.0776303
M5 GO Biological Process	GOBP_NEGATIVE_REGULATION_OF_HEMOPOIESIS	121	1.48024	0.00592593	0.0778411
M5 GO Biological Process	GOBP_ARF_PROTEIN_SIGNAL_TRANSDUCTION	20	1.47996	0.0347222	0.0779506
M5 GO Cellular Component	GOCC_ACTIN_CYTOSKELETON	498	1.47992	0	0.0779204
M5 GO Biological Process	GOBP_REGULATION_OF_REGULATED_SECRETORY_PATHWAY	154	1.47988	0.00434153	0.0778922
M5 GO Biological Process	GOBP_RESPONSE_TO_INSULIN	253	1.47931	0.00402685	0.0781658
M5 GO Biological Process	GOBP_LIPID_MODIFICATION	199	1.47737	0.00412655	0.0792787
M5 GO Biological Process	GOBP_NEGATIVE_REGULATION_OF_SMALL_GTPASE_MEDIATED_SIGNAL_TRANSDUCTION	62	1.4773	0.0175719	0.079271
M5 GO Biological Process	GOBP_REGULATION_OF_PLASMA_MEMBRANE_ORGANIZATION	18	1.47674	0.053211	0.0795806
M5 GO Biological Process	GOBP_INTERLEUKIN_4_PRODUCTION	53	1.47644	0.0332805	0.0797103
M5 GO Biological Process	GOBP_REGULATION_OF_MITOPHAGY	18	1.4764	0.0516014	0.0796893
M5 GO Biological Process	GOBP_POSITIVE_REGULATION_OF_MYOBLAST_PROLIFERATION	16	1.47632	0.0711679	0.0796834
M5 GO Biological Process	GOBP_POSITIVE_REGULATION_OF_CHEMOKINE_C_X_C_MOTIF_LIGAND_2_PRODUCTION	15	1.47624	0.0421053	0.0796892
M5 GO Biological Process	GOBP_REGULATION_OF_ARP2_3_COMPLEX_MEDIATED_ACTIN_NUCLEATION	27	1.47479	0.0500864	0.0805105
M5 GO Biological Process	GOBP_VITAMIN_D_METABOLIC_PROCESS	16	1.47472	0.04811	0.0805199
M5 GO Cellular Component	GOCC_PERINUCLEAR_ENDOPLASMIC_RETICULUM	28	1.47438	0.0405405	0.0806845
M5 GO Biological Process	GOBP_LYMPH_NODE_DEVELOPMENT	30	1.4742	0.0387205	0.0807442
M2 Reactome pathway	REACTOME_AQUAPORIN_MEDIATED_TRANSPORT	38	1.47399	0.0381426	0.080799
M5 GO Biological Process	GOBP_REGULATION_OF_ENDOCRINE_PROCESS	52	1.4736	0.021875	0.0809985
M5 GO Biological Process	GOBP_INOSITOL_TRISPHOSPHATE_METABOLIC_PROCESS	18	1.47351	0.046281	0.0810109
M5 GO Biological Process	GOBP_POSITIVE_REGULATION_OF_CD8_POSITIVE_ALPHA_BETA_T_CELL_PROLIFERATION	16	1.47339	0.0614035	0.0810376
M5 GO Biological Process	GOBP_POSITIVE_REGULATION_OF_NUCLEOCYTOPLASMIC_TRANSPORT	75	1.47253	0.0162338	0.0815038
M5 GO Biological Process	GOBP_ENDOCRINE_PROCESS	106	1.47249	0.016692	0.0814839
M5 GO Biological Process	GOBP_REGULATION_OF_AUTOPHAGY	292	1.47238	0.00535475	0.0815007
M5 GO Biological Process	GOBP_VASCULAR_ASSOCIATED_SMOOTH_MUSCLE_CONTRACTION	29	1.47221	0.0338983	0.0815555
M5 GO Biological Process	GOBP_NEGATIVE_REGULATION_OF_AMINO_ACID_TRANSPORT	20	1.47177	0.0552677	0.0817728
M2 BioCarta pathway	BIOCARTA_MET_PATHWAY	33	1.47172	0.031614	0.0817514
M5 GO Biological Process	GOBP_EPITHELIAL_CELL_APOPTOTIC_PROCESS	160	1.4716	0.00434153	0.0817679
M5 GO Biological Process	GOBP_ESTABLISHMENT_OF_PROTEIN_LOCALIZATION_TO_VACUOLE	59	1.47077	0.0208668	0.0822419
M5 GO Biological Process	GOBP_NEGATIVE_REGULATION_OF_PROTEIN_SERINE_THREONINE_KINASE_ACTIVITY	106	1.4699	0.0156006	0.0827248
M5 GO Cellular Component	GOCC_ENDOPLASMIC_RETICULUM_LUMEN	86	1.46986	0.0142631	0.0826969
M5 GO Biological Process	GOBP_PHOSPHATIDYLCHOLINE_CATABOLIC_PROCESS	15	1.46916	0.0555556	0.08309
M5 GO Cellular Component	GOCC_COPII_COATED_ER_TO_GOLGI_TRANSPORT_VESICLE	54	1.46896	0.0206677	0.0831585
M5 GO Biological Process	GOBP_RESPONSE_TO_STILBENOID	20	1.46864	0.0482143	0.0833182
M5 GO Biological Process	GOBP_INTRACELLULAR_LIPID_TRANSPORT	44	1.46838	0.0366826	0.0834351
M2 Reactome pathway	REACTOME_METABOLISM_OF_NUCLEOTIDES	94	1.46811	0.00606061	0.0835464
M5 GO Biological Process	GOBP_REGULATION_OF_PROTEIN_LOCALIZATION_TO_CELL_SURFACE	44	1.46745	0.0272873	0.083906
M5 GO Biological Process	GOBP_FAT_CELL_DIFFERENTIATION	263	1.46672	0.00414365	0.084322
M5 GO Biological Process	GOBP_NEGATIVE_REGULATION_OF_AMINE_TRANSPORT	37	1.46661	0.0383333	0.0843348
M5 GO Biological Process	GOBP_FIBROBLAST_PROLIFERATION	147	1.46652	0.00430416	0.0843382
M5 GO Biological Process	GOBP_REGULATION_OF_MYELOID_CELL_APOPTOTIC_PROCESS	36	1.46651	0.0429043	0.0842899
M5 GO Biological Process	GOBP_PHOSPHATIDYLINOSITOL_DEPHOSPHORYLATION	26	1.46641	0.0303541	0.0843021
M5 GO Molecular Function	GOMF_KINASE_REGULATOR_ACTIVITY	254	1.46497	0.00405954	0.0851841
M2 WikiPathways pathway	WP_HYPOXIA_DEPENDENT_PROLIFERATION_OF_MYOBLASTS	19	1.46493	0.0477816	0.0851567
M5 GO Biological Process	GOBP_RESPONSE_TO_TEMPERATURE_STIMULUS	161	1.46463	0.00571429	0.0852986
M5 GO Biological Process	GOBP_PROTECTION_FROM_NATURAL_KILLER_CELL_MEDIATED_CYTOTOXICITY	21	1.46433	0.0553633	0.0854289
M5 GO Biological Process	GOBP_PIGMENT_GRANULE_LOCALIZATION	20	1.46411	0.0529915	0.0855102
M5 GO Biological Process	GOBP_IMPORT_INTO_NUCLEUS	180	1.46393	0	0.0855678
M2 Reactome pathway	REACTOME_ADRENALINE_NORADRENALINE_INHIBITS_INSULIN_SECRETION	22	1.4638	0.0543294	0.0855937
M5 GO Biological Process	GOBP_POSITIVE_REGULATION_OF_MACROPHAGE_DIFFERENTIATION	15	1.46361	0.0537262	0.0856793
M2 BioCarta pathway	BIOCARTA_GSK3_PATHWAY	21	1.46358	0.0528053	0.0856418
M5 GO Biological Process	GOBP_AMP_METABOLIC_PROCESS	28	1.46329	0.0506108	0.0857714
M5 GO Biological Process	GOBP_NEGATIVE_REGULATION_OF_SMOOTH_MUSCLE_CONTRACTION	19	1.46314	0.0607083	0.0858048
M5 GO Molecular Function	GOMF_ASPARTIC_TYPE_PEPTIDASE_ACTIVITY	26	1.46183	0.0382695	0.0865981
M5 GO Biological Process	GOBP_CORTICOSTEROID_HORMONE_SECRETION	21	1.46142	0.0515464	0.0868057
M2 WikiPathways pathway	WP_EICOSANOID_METABOLISM_VIA_CYCLOOXYGENASES_COX	30	1.46076	0.0386473	0.0871837
M2 BioCarta pathway	BIOCARTA_INFLAM_PATHWAY	20	1.46069	0.0567986	0.0871774
M2 BioCarta pathway	BIOCARTA_FCER1_PATHWAY	38	1.46063	0.0449438	0.0871737
M5 GO Molecular Function	GOMF_PEPTIDE_BINDING	304	1.46051	0	0.0871868
M5 GO Biological Process	GOBP_ADENYLATE_CYCLASE_ACTIVATING_G_PROTEIN_COUPLED_RECEPTOR_SIGNALING_PATHWAY	150	1.46034	0.00725689	0.0872336
M5 GO Biological Process	GOBP_POSITIVE_REGULATION_OF_RELEASE_OF_CYTOCHROME_C_FROM_MITOCHONDRIA	28	1.46007	0.0460177	0.0873502
M5 GO Biological Process	GOBP_REGULATION_OF_PROTEIN_EXIT_FROM_ENDOPLASMIC_RETICULUM	22	1.45991	0.0696517	0.0873897
M5 GO Molecular Function	GOMF_PHOSPHATIDYLINOSITOL_3_PHOSPHATE_BINDING	47	1.45947	0.0392799	0.0876494
M5 GO Biological Process	GOBP_ANTIGEN_PROCESSING_AND_PRESENTATION_OF_EXOGENOUS_PEPTIDE_ANTIGEN_VIA_MHC_CLASS_IB	17	1.45933	0.0605565	0.0876699
M5 GO Biological Process	GOBP_NEGATIVE_REGULATION_OF_CYSTEINE_TYPE_ENDOPEPTIDASE_ACTIVITY	85	1.45923	0.0231839	0.0876813
M5 GO Cellular Component	GOCC_AUTOPHAGOSOME_MEMBRANE	40	1.45922	0.0452261	0.0876297
M5 GO Biological Process	GOBP_REGULATION_OF_RECEPTOR_INTERNALIZATION	83	1.45882	0.0170015	0.0878431
M5 GO Molecular Function	GOMF_PHOSPHOLIPASE_C_ACTIVITY	20	1.45864	0.0486577	0.0879157
M5 GO Biological Process	GOBP_RESPONSE_TO_STARVATION	192	1.45838	0.00424328	0.0880385
M5 GO Cellular Component	GOCC_ORGANELLE_MEMBRANE_CONTACT_SITE	43	1.4579	0.0353698	0.0883023
M5 GO Biological Process	GOBP_REGULATION_OF_POSTSYNAPTIC_NEUROTRANSMITTER_RECEPTOR_INTERNALIZATION	28	1.45664	0.0326461	0.089113
M5 GO Biological Process	GOBP_FIBROBLAST_APOPTOTIC_PROCESS	31	1.45657	0.0430464	0.0891003
M5 GO Biological Process	GOBP_MEMBRANE_LIPID_CATABOLIC_PROCESS	35	1.45655	0.0319865	0.0890553
M5 GO Cellular Component	GOCC_MICROVILLUS	102	1.45655	0.0139535	0.0890024
M5 GO Biological Process	GOBP_REGULATION_OF_MITOCHONDRIAL_DEPOLARIZATION	23	1.45646	0.0458554	0.0890002
M5 GO Biological Process	GOBP_CLATHRIN_COAT_ASSEMBLY	19	1.45643	0.0649573	0.0889613
M5 GO Biological Process	GOBP_NEGATIVE_REGULATION_OF_GLUCOSE_TRANSMEMBRANE_TRANSPORT	24	1.45526	0.0536913	0.0897233
M5 GO Biological Process	GOBP_NEGATIVE_REGULATION_OF_UBIQUITIN_PROTEIN_TRANSFERASE_ACTIVITY	17	1.45525	0.0601002	0.0896767
M5 GO Biological Process	GOBP_REGULATION_OF_DNA_BINDING_TRANSCRIPTION_FACTOR_ACTIVITY	427	1.45467	0	0.0900034
M5 GO Biological Process	GOBP_PROTEIN_LOCALIZATION_TO_CELL_CELL_JUNCTION	24	1.4545	0.050173	0.0900704
M5 GO Molecular Function	GOMF_PROTEIN_SEQUESTERING_ACTIVITY	25	1.45288	0.0561983	0.0910534
M5 GO Cellular Component	GOCC_SECRETORY_GRANULE_MEMBRANE	83	1.4527	0.0254372	0.0911249
M5 GO Biological Process	GOBP_REGULATION_OF_FATTY_ACID_TRANSPORT	38	1.45266	0.0551839	0.0911025
M5 GO Biological Process	GOBP_REGULATION_OF_MEMBRANE_LIPID_DISTRIBUTION	56	1.4522	0.0229508	0.0913625
M5 GO Biological Process	GOBP_T_HELPER_17_CELL_DIFFERENTIATION	31	1.45211	0.049236	0.0913635
M5 GO Biological Process	GOBP_NEGATIVE_REGULATION_OF_RESPONSE_TO_CYTOKINE_STIMULUS	77	1.45201	0.0180921	0.0913626
M5 GO Molecular Function	GOMF_BETA_2_MICROGLOBULIN_BINDING	17	1.45147	0.0750853	0.0916971
M2 Reactome pathway	REACTOME_IKK_COMPLEX_RECRUITMENT_MEDIATED_BY_RIP1	23	1.45124	0.0565068	0.0917994
M5 GO Biological Process	GOBP_RESPONSE_TO_DECREASED_OXYGEN_LEVELS	229	1.45063	0.0027933	0.0921626
M5 GO Biological Process	GOBP_LIPID_STORAGE	99	1.45046	0.0141287	0.0922187
M5 GO Biological Process	GOBP_POSITIVE_REGULATION_OF_REGULATORY_T_CELL_DIFFERENTIATION	21	1.45022	0.065371	0.0923355
M5 GO Biological Process	GOBP_REGULATION_OF_EXOCYTOSIS	217	1.45019	0.00710227	0.0923106
M5 GO Biological Process	GOBP_OVULATION_CYCLE_PROCESS	53	1.44966	0.0255973	0.0926063
M5 GO Biological Process	GOBP_NEURON_PROJECTION_REGENERATION	65	1.44953	0.0251177	0.0926332
M2 Reactome pathway	REACTOME_RHOF_GTPASE_CYCLE	40	1.44916	0.0303541	0.0928172
M5 GO Biological Process	GOBP_REGULATION_OF_ERYTHROCYTE_DIFFERENTIATION	49	1.44884	0.019802	0.0929801
M2 WikiPathways pathway	WP_OMEGA_3_OMEGA_6_FATTY_ACID_SYNTHESIS	15	1.44866	0.057041	0.0930601
M5 GO Biological Process	GOBP_HETEROPHILIC_CELL_CELL_ADHESION_VIA_PLASMA_MEMBRANE_CELL_ADHESION_MOLECULES	49	1.44828	0.0315091	0.093277
M5 GO Biological Process	GOBP_CERAMIDE_METABOLIC_PROCESS	97	1.44779	0.015949	0.0936146
M5 GO Biological Process	GOBP_REGULATION_OF_CALCIUM_MEDIATED_SIGNALING	87	1.44744	0.0196375	0.0938051
M5 GO Biological Process	GOBP_REGULATION_OF_CELLULAR_SENESCENCE	47	1.44719	0.0288	0.0939371
M2 Reactome pathway	REACTOME_NRAGE_SIGNALS_DEATH_THROUGH_JNK	51	1.44705	0.0288925	0.0939722
M5 GO Biological Process	GOBP_PYRIMIDINE_NUCLEOBASE_METABOLIC_PROCESS	19	1.44687	0.0556522	0.0940377
M5 GO Cellular Component	GOCC_SECRETORY_GRANULE	407	1.4468	0.00127877	0.0940289
M5 GO Biological Process	GOBP_AUTOPHAGOSOME_MATURATION	54	1.44677	0.0405186	0.0939953
M5 GO Biological Process	GOBP_CHEMOKINE_C_X_C_MOTIF_LIGAND_2_PRODUCTION	28	1.44657	0.0584071	0.0940784
M5 GO Biological Process	GOBP_EXTRACELLULAR_MATRIX_DISASSEMBLY	37	1.44645	0.0481541	0.0941042
M5 GO Molecular Function	GOMF_ATP_DEPENDENT_ACTIVITY_ACTING_ON_RNA	73	1.44633	0.0181818	0.0941359
M2 Reactome pathway	REACTOME_SIGNALING_BY_NTRK1_TRKA	63	1.44623	0.0340357	0.0941436
M5 GO Biological Process	GOBP_NEGATIVE_REGULATION_OF_SIGNALING_RECEPTOR_ACTIVITY	34	1.44603	0.0490506	0.0942335
M2 Reactome pathway	REACTOME_ASPIRIN_ADME	23	1.44601	0.064736	0.0941922
M5 GO Biological Process	GOBP_EXECUTION_PHASE_OF_APOPTOSIS	73	1.44598	0.0174051	0.0941536
M5 GO Biological Process	GOBP_HEPATICOBILIARY_SYSTEM_DEVELOPMENT	138	1.44485	0.00454545	0.094903
M5 GO Biological Process	GOBP_IMMUNE_SYSTEM_DEVELOPMENT	235	1.44467	0.00286533	0.0949799
M5 GO Molecular Function	GOMF_CYCLIC_NUCLEOTIDE_PHOSPHODIESTERASE_ACTIVITY	25	1.44462	0.0472973	0.0949576
M5 GO Biological Process	GOBP_HEART_TRABECULA_MORPHOGENESIS	35	1.44441	0.0306122	0.0950587
M2 BioCarta pathway	BIOCARTA_BCR_PATHWAY	31	1.44441	0.0429752	0.0950037
M5 GO Cellular Component	GOCC_BRUSH_BORDER	141	1.44435	0.0144928	0.0949903
M5 GO Biological Process	GOBP_POSITIVE_REGULATION_OF_TRANSMEMBRANE_RECEPTOR_PROTEIN_SERINE_THREONINE_KINASE_SIGNALING_PATHWAY	100	1.44305	0.0111288	0.095862
M5 GO Biological Process	GOBP_POSITIVE_REGULATION_OF_AUTOPHAGY	154	1.44302	0.0105422	0.095829
M2 Reactome pathway	REACTOME_SIGNALING_BY_ERYTHROPOIETIN	16	1.44281	0.0641711	0.0959313
M5 GO Biological Process	GOBP_NONRIBOSOMAL_PEPTIDE_BIOSYNTHETIC_PROCESS	16	1.44269	0.0858676	0.0959662
M5 GO Biological Process	GOBP_POSITIVE_REGULATION_OF_CALCIUM_MEDIATED_SIGNALING	46	1.4426	0.0468498	0.0959677
M5 GO Biological Process	GOBP_POSITIVE_REGULATION_OF_HOMOTYPIC_CELL_CELL_ADHESION	15	1.44254	0.0636833	0.0959468
M5 GO Biological Process	GOBP_REGULATION_OF_PROTEIN_IMPORT_INTO_NUCLEUS	78	1.44227	0.0222222	0.0960819
M5 GO Biological Process	GOBP_DEOXYRIBONUCLEOSIDE_MONOPHOSPHATE_CATABOLIC_PROCESS	19	1.44128	0.0630324	0.0967021
M5 GO Biological Process	GOBP_POSITIVE_REGULATION_OF_PROTEIN_LOCALIZATION_TO_CELL_PERIPHERY	74	1.44119	0.0140406	0.0967141
M5 GO Biological Process	GOBP_PROTEIN_COMPLEX_OLIGOMERIZATION	255	1.44061	0.00555556	0.0970962
M5 GO Biological Process	GOBP_RESPONSE_TO_OXYGEN_LEVELS	251	1.43974	0.00282486	0.0976482
M5 GO Biological Process	GOBP_POSITIVE_REGULATION_OF_PROTEIN_IMPORT_INTO_NUCLEUS	53	1.43863	0.0403877	0.0984254
M2 Reactome pathway	REACTOME_INTRINSIC_PATHWAY_FOR_APOPTOSIS	38	1.43827	0.0507614	0.0986212
M5 GO Biological Process	GOBP_INOSITOL_PHOSPHATE_BIOSYNTHETIC_PROCESS	31	1.43814	0.0529915	0.0986582
M2 Reactome pathway	REACTOME_INTRINSIC_PATHWAY_OF_FIBRIN_CLOT_FORMATION	22	1.4377	0.0695652	0.0989338
M2 WikiPathways pathway	WP_GPCRS_ODORANT	114	1.43761	0.0188953	0.0989387
M5 GO Biological Process	GOBP_GLYCOLIPID_CATABOLIC_PROCESS	15	1.43753	0.0807339	0.0989404
M5 GO Biological Process	GOBP_PRIMARY_AMINO_COMPOUND_METABOLIC_PROCESS	18	1.43734	0.0814159	0.0990188
M5 GO Biological Process	GOBP_REGULATION_OF_ACTIN_NUCLEATION	35	1.4372	0.0470588	0.0990649
M5 GO Biological Process	GOBP_AORTA_DEVELOPMENT	71	1.4372	0.0167939	0.0990145
M5 GO Biological Process	GOBP_RESPONSE_TO_TUMOR_CELL	41	1.43713	0.0367893	0.0990085
M5 GO Molecular Function	GOMF_L_ASCORBIC_ACID_BINDING	19	1.43701	0.0661896	0.0990318
M5 GO Biological Process	GOBP_RESPONSE_TO_SALT_STRESS	21	1.43701	0.0541455	0.0989789
M2 Reactome pathway	REACTOME_INTERLEUKIN_RECEPTOR_SHC_SIGNALING	19	1.43691	0.0634921	0.0989888
M5 GO Biological Process	GOBP_POSITIVE_REGULATION_OF_VIRAL_PROCESS	68	1.43684	0.023622	0.0989841
M5 GO Biological Process	GOBP_POSITIVE_REGULATION_OF_P38MAPK_CASCADE	29	1.43647	0.0525424	0.0992044
M5 GO Molecular Function	GOMF_PROTEIN_KINASE_C_BINDING	59	1.43573	0.0298273	0.0996971
M5 GO Biological Process	GOBP_VASCULAR_ASSOCIATED_SMOOTH_MUSCLE_CELL_DIFFERENTIATION	42	1.43554	0.0399334	0.0997877
M5 GO Biological Process	GOBP_POSITIVE_REGULATION_OF_SMALL_MOLECULE_METABOLIC_PROCESS	177	1.43387	0.010101	0.100987
M5 GO Biological Process	GOBP_NEGATIVE_REGULATION_OF_GLUCOSE_IMPORT	20	1.43339	0.0734266	0.101314
M5 GO Biological Process	GOBP_NATURAL_KILLER_CELL_CYTOKINE_PRODUCTION	21	1.43324	0.0726073	0.101349
M5 GO Biological Process	GOBP_NEGATIVE_REGULATION_OF_BLOOD_CIRCULATION	28	1.43292	0.0501672	0.101513
M5 GO Biological Process	GOBP_POSITIVE_REGULATION_OF_PROTEIN_BINDING	102	1.43284	0.0127841	0.101501
M5 GO Biological Process	GOBP_REGULATION_OF_NUCLEASE_ACTIVITY	27	1.4327	0.0408859	0.101536
M5 GO Biological Process	GOBP_POSITIVE_REGULATION_OF_SECRETION	395	1.43254	0	0.101591
M2 Reactome pathway	REACTOME_GLUCAGON_TYPE_LIGAND_RECEPTORS	30	1.43252	0.066129	0.101548
M2 Reactome pathway	REACTOME_G_ALPHA_12_13_SIGNALLING_EVENTS	75	1.43209	0.0250391	0.101806
M5 GO Biological Process	GOBP_DIGESTION	119	1.43203	0.0119225	0.101809
M5 GO Biological Process	GOBP_REGULATION_OF_EPITHELIAL_TO_MESENCHYMAL_TRANSITION	102	1.43175	0.0137615	0.101982
M5 GO Biological Process	GOBP_NEGATIVE_REGULATION_OF_CELL_SUBSTRATE_ADHESION	61	1.43165	0.0309446	0.102007
M5 GO Biological Process	GOBP_EPITHELIAL_CELL_DEVELOPMENT	227	1.43147	0.00132626	0.102071
M5 GO Cellular Component	GOCC_ENDOPLASMIC_RETICULUM_PROTEIN_CONTAINING_COMPLEX	130	1.43128	0.00892857	0.102166
M5 GO Biological Process	GOBP_NEGATIVE_REGULATION_OF_MAPK_CASCADE	182	1.43085	0.00846262	0.102423
M5 GO Biological Process	GOBP_OLIGOSACCHARIDE_CATABOLIC_PROCESS	15	1.43037	0.0784641	0.10271
M5 GO Biological Process	GOBP_REGULATION_OF_AMYLOID_PRECURSOR_PROTEIN_CATABOLIC_PROCESS	45	1.43036	0.03125	0.102658
M5 GO Biological Process	GOBP_NEGATIVE_REGULATION_OF_PROTEIN_POLYMERIZATION	84	1.43035	0.0260337	0.102609
M2 Reactome pathway	REACTOME_RHOA_GTPASE_CYCLE	140	1.42975	0.0149031	0.102971
M5 GO Biological Process	GOBP_POSITIVE_REGULATION_OF_NON_CANONICAL_NF_KAPPAB_SIGNAL_TRANSDUCTION	69	1.4297	0.025	0.102958
M2 BioCarta pathway	BIOCARTA_EPO_PATHWAY	19	1.42968	0.0730435	0.102916
M5 GO Biological Process	GOBP_BIOMINERAL_TISSUE_DEVELOPMENT	176	1.42905	0.00736377	0.103336
M5 GO Biological Process	GOBP_REGULATION_OF_BONE_MINERALIZATION	86	1.42871	0.0188976	0.103534
M5 GO Biological Process	GOBP_PROTEIN_EXIT_FROM_ENDOPLASMIC_RETICULUM	41	1.42807	0.042654	0.103957
M5 GO Biological Process	GOBP_NEGATIVE_REGULATION_OF_CARDIAC_MUSCLE_CELL_PROLIFERATION	16	1.42762	0.0619621	0.104206
M2 BioCarta pathway	BIOCARTA_BCELLSURVIVAL_PATHWAY	16	1.42696	0.0827465	0.104686
M2 Reactome pathway	REACTOME_ASPARAGINE_N_LINKED_GLYCOSYLATION	257	1.42617	0.00405405	0.105217
M5 GO Biological Process	GOBP_CALCIUM_DEPENDENT_CELL_CELL_ADHESION_VIA_PLASMA_MEMBRANE_CELL_ADHESION_MOLECULES	38	1.42604	0.0549273	0.105254
M5 GO Molecular Function	GOMF_TRANSFORMING_GROWTH_FACTOR_BETA_BINDING	25	1.42596	0.0645161	0.105248
M2 BioCarta pathway	BIOCARTA_TPO_PATHWAY	25	1.42584	0.0798669	0.105275
M5 GO Biological Process	GOBP_REGULATION_OF_TOLL_LIKE_RECEPTOR_4_SIGNALING_PATHWAY	26	1.4257	0.0604027	0.105329
M2 Reactome pathway	REACTOME_INACTIVATION_OF_CSF3_G_CSF_SIGNALING	18	1.42523	0.0732984	0.105619
M5 GO Biological Process	GOBP_VESICLE_LOCALIZATION	211	1.4252	0.00414365	0.10558
M5 GO Biological Process	GOBP_REGULATION_OF_TYPE_I_INTERFERON_MEDIATED_SIGNALING_PATHWAY	45	1.42504	0.0459016	0.105645
M5 GO Biological Process	GOBP_ANAGEN	16	1.42475	0.0693241	0.105782
M5 GO Molecular Function	GOMF_LOW_DENSITY_LIPOPROTEIN_PARTICLE_BINDING	18	1.42473	0.0866551	0.105738
M5 GO Biological Process	GOBP_ACTIN_FILAMENT_BUNDLE_ORGANIZATION	178	1.42442	0.0102941	0.105905
M5 GO Biological Process	GOBP_NEGATIVE_REGULATION_OF_ACTIN_FILAMENT_POLYMERIZATION	68	1.42398	0.0329154	0.106187
M5 GO Biological Process	GOBP_MYELOID_CELL_HOMEOSTASIS	205	1.42388	0.00574713	0.106209
M2 WikiPathways pathway	WP_IL_7_SIGNALING_PATHWAY	43	1.42344	0.0540541	0.106504
M5 GO Biological Process	GOBP_REGULATION_OF_PLASMINOGEN_ACTIVATION	17	1.4234	0.0738739	0.10648
M5 GO Biological Process	GOBP_NEGATIVE_REGULATION_OF_MYELOID_CELL_APOPTOTIC_PROCESS	22	1.42316	0.0639033	0.106599
M5 GO Biological Process	GOBP_POSITIVE_REGULATION_OF_FATTY_ACID_TRANSPORT	26	1.42305	0.0584307	0.106629
M5 GO Biological Process	GOBP_MITOCHONDRIAL_DEPOLARIZATION	28	1.42236	0.0557432	0.107118
M5 GO Biological Process	GOBP_POSITIVE_REGULATION_OF_VASCULAR_ASSOCIATED_SMOOTH_MUSCLE_CELL_MIGRATION	21	1.42178	0.0633562	0.107528
M5 GO Biological Process	GOBP_POLYOL_METABOLIC_PROCESS	107	1.42177	0.0227618	0.107475
M2 Reactome pathway	REACTOME_TRAF6_MEDIATED_INDUCTION_OF_TAK1_COMPLEX_WITHIN_TLR4_COMPLEX	16	1.42175	0.0671256	0.107429
M2 Reactome pathway	REACTOME_COPII_MEDIATED_VESICLE_TRANSPORT	68	1.42154	0.0268562	0.107526
M2 Reactome pathway	REACTOME_CHONDROITIN_SULFATE_BIOSYNTHESIS	18	1.42006	0.0736842	0.108606
M5 GO Biological Process	GOBP_POSITIVE_REGULATION_OF_PEPTIDYL_SERINE_PHOSPHORYLATION	103	1.41978	0.0255639	0.108779
M5 GO Biological Process	GOBP_SEQUESTERING_OF_CALCIUM_ION	130	1.41959	0.0161054	0.108876
M2 Reactome pathway	REACTOME_METABOLISM_OF_NITRIC_OXIDE_NOS3_ACTIVATION_AND_REGULATION	15	1.41916	0.0640809	0.10915
M2 Reactome pathway	REACTOME_G_PROTEIN_MEDIATED_EVENTS	40	1.41845	0.0425532	0.109666
M5 GO Molecular Function	GOMF_PHOSPHATASE_BINDING	231	1.41812	0.00416089	0.109839
M2 Reactome pathway	REACTOME_NETRIN_1_SIGNALING	21	1.41789	0.0541012	0.109944
M5 GO Biological Process	GOBP_POSITIVE_REGULATION_OF_DEPHOSPHORYLATION	59	1.41778	0.0347107	0.109973
M5 GO Biological Process	GOBP_REGULATION_OF_CALCIUM_ION_TRANSPORT	286	1.41708	0.00131752	0.110455
M5 GO Biological Process	GOBP_FILOPODIUM_ASSEMBLY	73	1.41658	0.0318979	0.110817
M5 GO Biological Process	GOBP_NEGATIVE_REGULATION_OF_CD4_POSITIVE_ALPHA_BETA_T_CELL_ACTIVATION	36	1.41648	0.0638298	0.110842
M5 GO Biological Process	GOBP_REGULATION_OF_PLATELET_DERIVED_GROWTH_FACTOR_RECEPTOR_SIGNALING_PATHWAY	24	1.4161	0.0692568	0.111077
M5 GO Biological Process	GOBP_REGULATION_OF_FAT_CELL_DIFFERENTIATION	148	1.4159	0.0102639	0.111155
M5 GO Biological Process	GOBP_RESPONSE_TO_XENOBIOTIC_STIMULUS	306	1.41586	0.00398406	0.111129
M5 GO Biological Process	GOBP_OOCYTE_MATURATION	37	1.41575	0.0492611	0.111153
M5 GO Biological Process	GOBP_REGULATION_OF_CELL_CELL_ADHESION_MEDIATED_BY_CADHERIN	17	1.41574	0.0635209	0.111098
M5 GO Biological Process	GOBP_OSSIFICATION	407	1.41553	0	0.111232
M5 GO Biological Process	GOBP_FEMALE_PREGNANCY	136	1.41471	0.011782	0.111827
M5 GO Biological Process	GOBP_REGULATION_OF_EPITHELIAL_CELL_DIFFERENTIATION_INVOLVED_IN_KIDNEY_DEVELOPMENT	17	1.41466	0.0819672	0.111808
M5 GO Biological Process	GOBP_POSITIVE_REGULATION_OF_TRANSMEMBRANE_TRANSPORT	269	1.41458	0.00527009	0.111809
M2 Reactome pathway	REACTOME_SPRY_REGULATION_OF_FGF_SIGNALING	16	1.41394	0.0830508	0.11223
M5 GO Biological Process	GOBP_KERATINOCYTE_MIGRATION	21	1.41385	0.0831889	0.112249
M5 GO Biological Process	GOBP_REGULATION_OF_TRANSMEMBRANE_RECEPTOR_PROTEIN_SERINE_THREONINE_KINASE_SIGNALING_PATHWAY	257	1.41367	0.00791557	0.112323
M5 GO Biological Process	GOBP_LYSOSOMAL_MEMBRANE_ORGANIZATION	15	1.41328	0.0759289	0.112574
M5 GO Biological Process	GOBP_SPHINGOLIPID_METABOLIC_PROCESS	140	1.41273	0.0144928	0.112953
M2 Reactome pathway	REACTOME_G_BETA_GAMMA_SIGNALLING_THROUGH_CDC42	19	1.41265	0.0971731	0.112962
M5 GO Biological Process	GOBP_NUCLEOSIDE_MONOPHOSPHATE_BIOSYNTHETIC_PROCESS	43	1.41253	0.0453809	0.112997
M5 GO Biological Process	GOBP_POSITIVE_REGULATION_OF_CELLULAR_CATABOLIC_PROCESS	331	1.4123	0.00392157	0.11313
M5 GO Biological Process	GOBP_POSTSYNAPSE_TO_NUCLEUS_SIGNALING_PATHWAY	16	1.4121	0.0951586	0.113225
M5 GO Molecular Function	GOMF_POLYSACCHARIDE_BINDING	26	1.41203	0.0758621	0.113226
M5 GO Biological Process	GOBP_REGULATION_OF_PROTEIN_POLYMERIZATION	200	1.41198	0.0058651	0.11319
M5 GO Biological Process	GOBP_NEGATIVE_REGULATION_OF_LIPID_TRANSPORT	35	1.41187	0.0487395	0.113235
M5 GO Biological Process	GOBP_REGULATION_OF_INTERLEUKIN_4_PRODUCTION	45	1.41185	0.0386643	0.113195
M5 GO Biological Process	GOBP_CARBOHYDRATE_TRANSMEMBRANE_TRANSPORT	122	1.41061	0.0192593	0.11411
M5 GO Biological Process	GOBP_DETECTION_OF_CHEMICAL_STIMULUS	167	1.41059	0.0121212	0.114059
M5 GO Biological Process	GOBP_DENDRITIC_SPINE_MAINTENANCE	25	1.41024	0.0774648	0.114256
M5 GO Cellular Component	GOCC_MULTIVESICULAR_BODY	57	1.41004	0.0330578	0.114361
M5 GO Biological Process	GOBP_POSITIVE_REGULATION_OF_PROTEIN_CATABOLIC_PROCESS	203	1.40995	0.00692521	0.114373
M5 GO Biological Process	GOBP_POSITIVE_REGULATION_OF_ICOSANOID_SECRETION	21	1.40947	0.0796296	0.114714
M2 Reactome pathway	REACTOME_ER_PHAGOSOME_PATHWAY	26	1.40943	0.0614887	0.114676
M5 GO Biological Process	GOBP_POSITIVE_REGULATION_OF_PEPTIDYL_THREONINE_PHOSPHORYLATION	29	1.40929	0.0764228	0.114725
M5 GO Biological Process	GOBP_NUCLEOBASE_BIOSYNTHETIC_PROCESS	17	1.40923	0.0721649	0.114703
M2 Reactome pathway	REACTOME_P75_NTR_RECEPTOR_MEDIATED_SIGNALLING	84	1.40916	0.0222222	0.1147
MH Hallmark	HALLMARK_P53_PATHWAY	199	1.40871	0.00813008	0.115026
M5 GO Biological Process	GOBP_POSITIVE_REGULATION_OF_TORC1_SIGNALING	52	1.40847	0.0461049	0.115151
M5 GO Biological Process	GOBP_INTRACELLULAR_PH_REDUCTION	46	1.40817	0.0336	0.115361
M5 GO Biological Process	GOBP_GLYCOSPHINGOLIPID_BIOSYNTHETIC_PROCESS	30	1.40779	0.0655462	0.115615
M5 GO Molecular Function	GOMF_CARBOHYDRATE_KINASE_ACTIVITY	21	1.40767	0.075	0.115652
M5 GO Biological Process	GOBP_CELLULAR_RESPONSE_TO_EXTERNAL_STIMULUS	288	1.40746	0.00263505	0.11575
M5 GO Biological Process	GOBP_REGULATION_OF_SUPRAMOLECULAR_FIBER_ORGANIZATION	383	1.40746	0	0.115687
M5 GO Biological Process	GOBP_POSITIVE_REGULATION_OF_NEURON_PROJECTION_DEVELOPMENT	232	1.40741	0.00558659	0.115659
M2 Reactome pathway	REACTOME_SIALIC_ACID_METABOLISM	31	1.40725	0.0735294	0.115727
M5 GO Biological Process	GOBP_ORGANIC_ACID_TRANSMEMBRANE_TRANSPORT	139	1.40649	0.0143472	0.116304
M5 GO Biological Process	GOBP_ASTROCYTE_DIFFERENTIATION	92	1.40608	0.0290076	0.116589
M2 Reactome pathway	REACTOME_RIPK1_MEDIATED_REGULATED_NECROSIS	31	1.40596	0.0752137	0.116617
M5 GO Biological Process	GOBP_IMP_BIOSYNTHETIC_PROCESS	15	1.40569	0.0775862	0.116766
M5 GO Biological Process	GOBP_POSITIVE_REGULATION_OF_PROTEIN_LOCALIZATION_TO_PLASMA_MEMBRANE	62	1.40567	0.0431177	0.116729
M5 GO Molecular Function	GOMF_R_SMAD_BINDING	26	1.40532	0.0627119	0.116935
M5 GO Biological Process	GOBP_XENOBIOTIC_TRANSPORT	40	1.40516	0.0535714	0.116993
M5 GO Biological Process	GOBP_POSITIVE_REGULATION_OF_EXTRINSIC_APOPTOTIC_SIGNALING_PATHWAY_VIA_DEATH_DOMAIN_RECEPTORS	16	1.40509	0.0909091	0.116991
M5 GO Biological Process	GOBP_REGULATED_EXOCYTOSIS	254	1.40508	0.00813008	0.116935
M5 GO Biological Process	GOBP_MAINTENANCE_OF_LOCATION	353	1.40499	0.00263505	0.116957
M5 GO Biological Process	GOBP_INDOLE_CONTAINING_COMPOUND_METABOLIC_PROCESS	26	1.40448	0.0690846	0.117335
M2 BioCarta pathway	BIOCARTA_41BB_PATHWAY	18	1.40443	0.0815972	0.117321
M5 GO Biological Process	GOBP_VESICLE_TARGETING_ROUGH_ER_TO_CIS_GOLGI	20	1.40438	0.080756	0.117298
M5 GO Biological Process	GOBP_OUTFLOW_TRACT_MORPHOGENESIS	87	1.40414	0.0157729	0.117433
M2 Reactome pathway	REACTOME_CARGO_TRAFFICKING_TO_THE_PERICILIARY_MEMBRANE	39	1.40394	0.0608553	0.117539
M5 GO Biological Process	GOBP_MODULATION_BY_HOST_OF_VIRAL_PROCESS	45	1.40287	0.0547264	0.118367
M5 GO Biological Process	GOBP_REGULATION_OF_CYTOPLASMIC_TRANSPORT	31	1.40278	0.0595813	0.118385
M5 GO Biological Process	GOBP_REGULATION_OF_PROTEIN_LOCALIZATION_TO_PLASMA_MEMBRANE	116	1.40214	0.0185185	0.118846
M2 Reactome pathway	REACTOME_PEROXISOMAL_LIPID_METABOLISM	28	1.40132	0.0759289	0.119471
M5 GO Molecular Function	GOMF_PHOSPHORIC_DIESTER_HYDROLASE_ACTIVITY	85	1.40126	0.029595	0.119464
M2 BioCarta pathway	BIOCARTA_IL6_PATHWAY	22	1.40105	0.0646258	0.119569
M5 GO Biological Process	GOBP_LACTATION	39	1.40061	0.0648918	0.119885
M5 GO Biological Process	GOBP_MULTI_MULTICELLULAR_ORGANISM_PROCESS	165	1.4006	0.0167173	0.119836
M5 GO Biological Process	GOBP_CALCIUM_ION_HOMEOSTASIS	330	1.4005	0.00129199	0.119865
M5 GO Cellular Component	GOCC_CELL_PROJECTION_MEMBRANE	321	1.39988	0.00131579	0.120324
M5 GO Biological Process	GOBP_REGULATION_OF_ORGANIC_ACID_TRANSPORT	99	1.39968	0.0268139	0.120432
M5 GO Biological Process	GOBP_ENDOTHELIAL_CELL_MORPHOGENESIS	15	1.39943	0.0900901	0.120556
M2 Reactome pathway	REACTOME_INTERLEUKIN_6_FAMILY_SIGNALING	22	1.39942	0.0751342	0.120498
M2 Reactome pathway	REACTOME_N_GLYCAN_ANTENNAE_ELONGATION	15	1.39937	0.0671506	0.120482
M5 GO Biological Process	GOBP_MUSCLE_CELL_PROLIFERATION	267	1.39828	0.00669344	0.121324
M5 GO Biological Process	GOBP_DETECTION_OF_STIMULUS	323	1.39803	0.00129534	0.121466
M5 GO Biological Process	GOBP_NEGATIVE_REGULATION_OF_CHEMOKINE_PRODUCTION	33	1.39788	0.0708263	0.12152
M5 GO Biological Process	GOBP_POSITIVE_REGULATION_OF_INTRINSIC_APOPTOTIC_SIGNALING_PATHWAY	73	1.39711	0.0404984	0.122131
M5 GO Biological Process	GOBP_POSITIVE_REGULATION_OF_PROTEIN_DEPHOSPHORYLATION	43	1.39695	0.0422078	0.122199
M5 GO Biological Process	GOBP_BIOLOGICAL_PROCESS_INVOLVED_IN_INTERACTION_WITH_SYMBIONT	106	1.39689	0.0272315	0.122178
M5 GO Biological Process	GOBP_ESTABLISHMENT_OF_PLANAR_POLARITY_INVOLVED_IN_NEURAL_TUBE_CLOSURE	16	1.39678	0.0800681	0.122227
M5 GO Biological Process	GOBP_TEMPERATURE_HOMEOSTASIS	194	1.39647	0.00821918	0.122436
M2 Reactome pathway	REACTOME_GAMMA_CARBOXYLATION_HYPUSINYLATION_HYDROXYLATION_AND_ARYLSULFATASE_ACTIVATION	53	1.39567	0.0362205	0.123038
M5 GO Biological Process	GOBP_TRANS_SYNAPTIC_SIGNALING_MODULATING_SYNAPTIC_TRANSMISSION	15	1.39551	0.090136	0.123108
M5 GO Biological Process	GOBP_REGULATION_OF_MYELINATION	59	1.39549	0.0488959	0.123057
M5 GO Biological Process	GOBP_ORGANIC_ACID_TRANSPORT	353	1.39513	0.00403769	0.12329
M5 GO Biological Process	GOBP_POSITIVE_REGULATION_OF_ERBB_SIGNALING_PATHWAY	25	1.39506	0.0828829	0.123275
M5 GO Biological Process	GOBP_ANDROGEN_METABOLIC_PROCESS	25	1.39458	0.0761421	0.123621
M5 GO Biological Process	GOBP_CELL_CELL_ADHESION_VIA_PLASMA_MEMBRANE_ADHESION_MOLECULES	208	1.3938	0.00813008	0.124222
M5 GO Biological Process	GOBP_REGULATION_OF_CYTOPLASMIC_TRANSLATION	31	1.39303	0.0726073	0.124833
M5 GO Biological Process	GOBP_REGULATION_OF_AUTOPHAGOSOME_ASSEMBLY	45	1.39272	0.0460526	0.125005
M2 Reactome pathway	REACTOME_PARACETAMOL_ADME	26	1.39258	0.072758	0.125073
M2 Reactome pathway	REACTOME_G_ALPHA_Z_SIGNALLING_EVENTS	32	1.3924	0.0703259	0.12516
M5 GO Biological Process	GOBP_POSITIVE_REGULATION_OF_PHOSPHOPROTEIN_PHOSPHATASE_ACTIVITY	19	1.39198	0.0840336	0.125472
M5 GO Biological Process	GOBP_RESPONSE_TO_PROSTAGLANDIN	26	1.39187	0.0824561	0.125491
M5 GO Biological Process	GOBP_NEGATIVE_REGULATION_OF_NF_KAPPAB_TRANSCRIPTION_FACTOR_ACTIVITY	80	1.39136	0.0442338	0.125873
M5 GO Biological Process	GOBP_NEGATIVE_REGULATION_OF_SYSTEMIC_ARTERIAL_BLOOD_PRESSURE	30	1.39134	0.089404	0.125826
M5 GO Biological Process	GOBP_PROSTANOID_BIOSYNTHETIC_PROCESS	30	1.39133	0.0645695	0.125765
M2 BioCarta pathway	BIOCARTA_ARENRF2_PATHWAY	19	1.39085	0.0932203	0.126133
M2 Reactome pathway	REACTOME_AZATHIOPRINE_ADME	26	1.39045	0.0677419	0.126418
M5 GO Biological Process	GOBP_CELLULAR_RESPONSE_TO_INSULIN_STIMULUS	214	1.3902	0.00694444	0.126554
M5 GO Biological Process	GOBP_CGMP_METABOLIC_PROCESS	17	1.38999	0.0815217	0.126666
M5 GO Biological Process	GOBP_G_PROTEIN_COUPLED_RECEPTOR_INTERNALIZATION	19	1.38992	0.0783972	0.126669
M5 GO Molecular Function	GOMF_MONOCARBOXYLIC_ACID_TRANSMEMBRANE_TRANSPORTER_ACTIVITY	61	1.38909	0.0390244	0.127352
M2 Reactome pathway	REACTOME_PLASMA_LIPOPROTEIN_CLEARANCE	34	1.38902	0.0648464	0.127337
M5 GO Biological Process	GOBP_BONE_DEVELOPMENT	231	1.3882	0.0094851	0.127996
M5 GO Biological Process	GOBP_PURINE_NUCLEOSIDE_MONOPHOSPHATE_BIOSYNTHETIC_PROCESS	25	1.38812	0.0858144	0.127999
M5 GO Biological Process	GOBP_POSITIVE_REGULATION_OF_MUSCLE_CONTRACTION	54	1.38784	0.0413355	0.128184
M5 GO Biological Process	GOBP_UNSATURATED_FATTY_ACID_BIOSYNTHETIC_PROCESS	41	1.38728	0.0581395	0.128617
M5 GO Molecular Function	GOMF_CALCIUM_DEPENDENT_CYSTEINE_TYPE_ENDOPEPTIDASE_ACTIVITY	15	1.38702	0.0792793	0.128769
M5 GO Molecular Function	GOMF_AMYLOID_BETA_BINDING	66	1.38689	0.053125	0.128813
M5 GO Biological Process	GOBP_POSITIVE_REGULATION_OF_GLUCOSE_TRANSMEMBRANE_TRANSPORT	49	1.38668	0.0406091	0.128926
M5 GO Molecular Function	GOMF_CARBOXY_LYASE_ACTIVITY	33	1.38658	0.0768	0.128959
M5 GO Biological Process	GOBP_PYRIMIDINE_RIBONUCLEOTIDE_BIOSYNTHETIC_PROCESS	18	1.38644	0.102293	0.129006
M5 GO Biological Process	GOBP_GOLGI_LOCALIZATION	15	1.38591	0.0944056	0.129401
M5 GO Biological Process	GOBP_REGULATION_OF_JNK_CASCADE	143	1.38539	0.028065	0.129797
M5 GO Biological Process	GOBP_CEREBRAL_CORTEX_RADIALLY_ORIENTED_CELL_MIGRATION	40	1.38525	0.0616667	0.129857
M5 GO Biological Process	GOBP_CYCLIC_NUCLEOTIDE_MEDIATED_SIGNALING	91	1.38508	0.0246533	0.129926
M2 Reactome pathway	REACTOME_INTERFERON_SIGNALING	124	1.38495	0.0176991	0.129975
M5 GO Biological Process	GOBP_CELLULAR_RESPONSE_TO_HEAT	51	1.38463	0.0416667	0.130197
M5 GO Biological Process	GOBP_REGULATION_OF_CELLULAR_RESPONSE_TO_TRANSFORMING_GROWTH_FACTOR_BETA_STIMULUS	143	1.3845	0.0180723	0.130241
M5 GO Biological Process	GOBP_NEGATIVE_REGULATION_OF_ACTIN_FILAMENT_DEPOLYMERIZATION	46	1.38442	0.0554622	0.130241
M5 GO Biological Process	GOBP_NEGATIVE_REGULATION_OF_CELL_JUNCTION_ASSEMBLY	35	1.38435	0.0657673	0.130247
M5 GO Cellular Component	GOCC_CLATHRIN_COAT	51	1.38431	0.0699523	0.130213
M5 GO Biological Process	GOBP_PROTEIN_MATURATION	495	1.38424	0.00121359	0.130208
M5 GO Biological Process	GOBP_NEGATIVE_REGULATION_OF_HYDROLASE_ACTIVITY	324	1.38408	0.0066313	0.13029
M2 Reactome pathway	REACTOME_NEGATIVE_REGULATION_OF_FGFR2_SIGNALING	33	1.38379	0.0812183	0.130487
M5 GO Biological Process	GOBP_CARDIAC_LEFT_VENTRICLE_MORPHOGENESIS	20	1.38336	0.0939045	0.130791
M5 GO Biological Process	GOBP_ENDOTHELIAL_CELL_CHEMOTAXIS	31	1.38296	0.092257	0.131085
M5 GO Molecular Function	GOMF_ACTIN_FILAMENT_BINDING	214	1.38287	0.00837989	0.131095
M5 GO Biological Process	GOBP_CELL_CELL_JUNCTION_ASSEMBLY	151	1.38247	0.0200573	0.131378
M5 GO Biological Process	GOBP_OLIGOSACCHARIDE_BIOSYNTHETIC_PROCESS	19	1.38233	0.0866551	0.131436
M5 GO Molecular Function	GOMF_GTPASE_ACTIVATING_PROTEIN_BINDING	20	1.38206	0.0860034	0.131612
M5 GO Biological Process	GOBP_POSITIVE_REGULATION_OF_MONOATOMIC_ION_TRANSPORT	266	1.38172	0.00543478	0.131861
M5 GO Cellular Component	GOCC_ZYMOGEN_GRANULE	24	1.38158	0.0865724	0.131905
M5 GO Biological Process	GOBP_BRANCHING_MORPHOGENESIS_OF_AN_EPITHELIAL_TUBE	194	1.3815	0.0229226	0.131897
M5 GO Molecular Function	GOMF_OXIDOREDUCTASE_ACTIVITY_ACTING_ON_METAL_IONS	16	1.38126	0.0965517	0.132032
M5 GO Biological Process	GOBP_CALCIUM_ION_TRANSPORT	446	1.38114	0.00127714	0.132073
M5 GO Molecular Function	GOMF_BH_DOMAIN_BINDING	18	1.37989	0.0882353	0.133106
M5 GO Biological Process	GOBP_REGULATION_OF_CARDIAC_MUSCLE_CELL_ACTION_POTENTIAL	27	1.37909	0.0745033	0.133763
M5 GO Biological Process	GOBP_CELLULAR_RESPONSE_TO_FLUID_SHEAR_STRESS	17	1.37883	0.0926244	0.133926
M5 GO Biological Process	GOBP_PROTEIN_DEGLYCOSYLATION	15	1.37882	0.104452	0.133858
M2 BioCarta pathway	BIOCARTA_INSULIN_PATHWAY	22	1.37866	0.0977702	0.133951
M5 GO Biological Process	GOBP_REGULATION_OF_LIPID_LOCALIZATION	184	1.37802	0.0178042	0.134478
M5 GO Biological Process	GOBP_STEROID_HORMONE_SECRETION	31	1.3776	0.0751634	0.1348
M2 BioCarta pathway	BIOCARTA_INTEGRIN_PATHWAY	33	1.37686	0.0808581	0.135415
M5 GO Biological Process	GOBP_LIPID_CATABOLIC_PROCESS	331	1.3766	0.00664894	0.135575
M5 GO Biological Process	GOBP_ORGANIC_HYDROXY_COMPOUND_TRANSPORT	302	1.37653	0.0105541	0.135578
M5 GO Cellular Component	GOCC_ACTIN_BASED_CELL_PROJECTION	227	1.37643	0.00849858	0.135609
M5 GO Biological Process	GOBP_ORGANIC_ANION_TRANSPORT	418	1.37625	0.00128535	0.135685
M5 GO Biological Process	GOBP_PROTEIN_HOMOOLIGOMERIZATION	185	1.37564	0.0224551	0.136185
M5 GO Biological Process	GOBP_INOSITOL_PHOSPHATE_METABOLIC_PROCESS	43	1.37553	0.0607553	0.136224
M5 GO Biological Process	GOBP_REGULATION_OF_PHOSPHOLIPASE_C_ACTIVITY	35	1.3744	0.0668896	0.13722
M5 GO Biological Process	GOBP_REGULATION_OF_BLOOD_CIRCULATION	264	1.37408	0.00683995	0.137433
M2 Reactome pathway	REACTOME_CD28_CO_STIMULATION	33	1.37408	0.0732113	0.137363
M5 GO Biological Process	GOBP_NEGATIVE_REGULATION_OF_MAP_KINASE_ACTIVITY	58	1.37388	0.0461285	0.137478
M5 GO Biological Process	GOBP_RETROGRADE_VESICLE_MEDIATED_TRANSPORT_GOLGI_TO_ENDOPLASMIC_RETICULUM	44	1.37376	0.0824089	0.137522
M5 GO Biological Process	GOBP_REGULATION_OF_LIPID_TRANSPORT	153	1.37357	0.0248538	0.137609
M2 Reactome pathway	REACTOME_EPH_EPHRIN_MEDIATED_REPULSION_OF_CELLS	34	1.37319	0.0833333	0.137898
M5 GO Biological Process	GOBP_ENDODERM_DEVELOPMENT	73	1.37288	0.0446841	0.138126
M5 GO Biological Process	GOBP_ESTABLISHMENT_OF_ORGANELLE_LOCALIZATION	474	1.37277	0.00251889	0.138169
M5 GO Biological Process	GOBP_AMINO_SUGAR_CATABOLIC_PROCESS	19	1.37274	0.100855	0.138133
M2 Reactome pathway	REACTOME_SYNTHESIS_OF_LEUKOTRIENES_LT_AND_EOXINS_EX	19	1.37263	0.0817052	0.13818
M2 Reactome pathway	REACTOME_CHONDROITIN_SULFATE_DERMATAN_SULFATE_METABOLISM	47	1.3722	0.0616114	0.138552
M5 GO Biological Process	GOBP_NEGATIVE_REGULATION_OF_CATION_CHANNEL_ACTIVITY	43	1.37191	0.0623946	0.13876
M5 GO Cellular Component	GOCC_GAP_JUNCTION	33	1.37106	0.0858034	0.139499
M2 Reactome pathway	REACTOME_APOPTOTIC_EXECUTION_PHASE	49	1.37064	0.0712025	0.139837
M5 GO Biological Process	GOBP_CELLULAR_RESPONSE_TO_EXTRACELLULAR_STIMULUS	254	1.37041	0.0136612	0.140003
M5 GO Biological Process	GOBP_ESTABLISHMENT_OF_PROTEIN_LOCALIZATION_TO_ENDOPLASMIC_RETICULUM	46	1.37032	0.0600649	0.140011
M5 GO Biological Process	GOBP_POSITIVE_REGULATION_OF_LIPID_LOCALIZATION	123	1.37021	0.0195489	0.14004
M5 GO Biological Process	GOBP_T_CELL_HOMEOSTASIS	55	1.37016	0.0429936	0.140008
M5 GO Biological Process	GOBP_LONG_CHAIN_FATTY_ACID_TRANSPORT	66	1.36996	0.0506329	0.1401
M5 GO Biological Process	GOBP_REGULATION_OF_LIPID_METABOLIC_PROCESS	372	1.3696	0.00767263	0.140356
M5 GO Cellular Component	GOCC_MITOCHONDRIA_ASSOCIATED_ENDOPLASMIC_RETICULUM_MEMBRANE	20	1.36933	0.0959596	0.14054
M5 GO Biological Process	GOBP_DETECTION_OF_TEMPERATURE_STIMULUS_INVOLVED_IN_SENSORY_PERCEPTION_OF_PAIN	23	1.36916	0.0749186	0.140627
M5 GO Biological Process	GOBP_RESPONSE_TO_AXON_INJURY	75	1.36913	0.0410334	0.140587
M2 Reactome pathway	REACTOME_CD28_DEPENDENT_PI3K_AKT_SIGNALING	22	1.36906	0.0878378	0.140575
M5 GO Biological Process	GOBP_FOREBRAIN_CELL_MIGRATION	71	1.36895	0.0398773	0.140616
M5 GO Biological Process	GOBP_ERAD_PATHWAY	107	1.36839	0.0333817	0.141054
M5 GO Biological Process	GOBP_REGULATION_OF_FATTY_ACID_METABOLIC_PROCESS	102	1.36808	0.0295858	0.141285
M5 GO Biological Process	GOBP_RETINA_VASCULATURE_DEVELOPMENT_IN_CAMERA_TYPE_EYE	22	1.36798	0.0962199	0.141311
M5 GO Biological Process	GOBP_NICOTINAMIDE_NUCLEOTIDE_BIOSYNTHETIC_PROCESS	16	1.36797	0.121417	0.141244
M5 GO Biological Process	GOBP_VITAMIN_BIOSYNTHETIC_PROCESS	26	1.36782	0.0868055	0.141338
M5 GO Biological Process	GOBP_LIPID_OXIDATION	122	1.36708	0.0246154	0.141962
M5 GO Biological Process	GOBP_BLASTOCYST_FORMATION	57	1.36688	0.0641628	0.142068
M5 GO Biological Process	GOBP_GLUTAMATE_RECEPTOR_SIGNALING_PATHWAY	50	1.36648	0.0711921	0.142377
M5 GO Biological Process	GOBP_CALCIUM_ION_TRANSMEMBRANE_IMPORT_INTO_CYTOSOL	186	1.36632	0.0114613	0.142461
M5 GO Biological Process	GOBP_CELLULAR_RESPONSE_TO_OSMOTIC_STRESS	52	1.36559	0.0498392	0.143098
M5 GO Biological Process	GOBP_REGULATION_OF_ESTABLISHMENT_OF_PLANAR_POLARITY	43	1.36554	0.0769231	0.143075
M5 GO Biological Process	GOBP_TIGHT_JUNCTION_ORGANIZATION	84	1.36514	0.0278638	0.143406
M5 GO Biological Process	GOBP_REGULATION_OF_DEFENSE_RESPONSE_TO_BACTERIUM	21	1.36514	0.0924956	0.143334
M5 GO Molecular Function	GOMF_HORMONE_RECEPTOR_BINDING	26	1.36477	0.102606	0.14359
M5 GO Biological Process	GOBP_PLASMA_MEMBRANE_TUBULATION	19	1.36437	0.100334	0.143902
M5 GO Biological Process	GOBP_NEGATIVE_REGULATION_OF_MUSCLE_CONTRACTION	30	1.36421	0.0713128	0.143975
M2 Reactome pathway	REACTOME_SURFACTANT_METABOLISM	21	1.36388	0.106115	0.144211
M5 GO Biological Process	GOBP_POSITIVE_REGULATION_OF_GLIOGENESIS	88	1.36367	0.0358255	0.144346
M5 GO Cellular Component	GOCC_APICAL_PART_OF_CELL	496	1.36357	0.00121359	0.144363
M2 BioCarta pathway	BIOCARTA_EDG1_PATHWAY	20	1.36338	0.104167	0.144489
M5 GO Biological Process	GOBP_GLIAL_CELL_PROLIFERATION	78	1.36298	0.0317965	0.144796
M2 BioCarta pathway	BIOCARTA_EIF4_PATHWAY	21	1.36288	0.0993031	0.144815
M5 GO Biological Process	GOBP_CALCIUM_ION_TRANSMEMBRANE_TRANSPORT	334	1.36252	0.00887199	0.145083
M2 Reactome pathway	REACTOME_TNF_SIGNALING	57	1.36204	0.0672131	0.145473
M2 BioCarta pathway	BIOCARTA_TOB1_PATHWAY	19	1.36197	0.109689	0.145469
M5 GO Biological Process	GOBP_HIPPO_SIGNALING	40	1.3613	0.0764007	0.146047
M5 GO Cellular Component	GOCC_CORTICAL_CYTOSKELETON	117	1.36118	0.0273381	0.146088
M2 BioCarta pathway	BIOCARTA_ATM_PATHWAY	19	1.36102	0.104712	0.146159
M5 GO Biological Process	GOBP_SULFUR_AMINO_ACID_METABOLIC_PROCESS	31	1.36102	0.089404	0.146093
M5 GO Biological Process	GOBP_REGULATION_OF_PROTEIN_BINDING	222	1.36074	0.00972222	0.146296
M5 GO Biological Process	GOBP_REGULATION_OF_METAL_ION_TRANSPORT	446	1.36013	0.00247831	0.146811
M5 GO Biological Process	GOBP_RESPONSE_TO_AMINO_ACID_STARVATION	54	1.35997	0.0703125	0.146894
M5 GO Biological Process	GOBP_PROTEOGLYCAN_METABOLIC_PROCESS	88	1.35957	0.0446841	0.147199
M5 GO Biological Process	GOBP_REGULATION_OF_PROTEIN_LOCALIZATION_TO_CELL_PERIPHERY	152	1.35885	0.020649	0.147832
M5 GO Biological Process	GOBP_PEPTIDE_HORMONE_PROCESSING	23	1.35881	0.0814159	0.1478
M5 GO Biological Process	GOBP_POSITIVE_REGULATION_OF_CALCIUM_ION_TRANSPORT	143	1.35818	0.0324859	0.148375
M5 GO Biological Process	GOBP_DETECTION_OF_MECHANICAL_STIMULUS_INVOLVED_IN_SENSORY_PERCEPTION	54	1.35762	0.0472441	0.148851
M5 GO Molecular Function	GOMF_PHOSPHOLIPASE_ACTIVITY	94	1.35745	0.0406886	0.148952
M5 GO Biological Process	GOBP_EPITHELIAL_TO_MESENCHYMAL_TRANSITION	165	1.3571	0.0174673	0.149211
M5 GO Biological Process	GOBP_REGULATION_OF_ENDOTHELIAL_CELL_CHEMOTAXIS	23	1.35703	0.0913884	0.149211
M5 GO Biological Process	GOBP_NEGATIVE_REGULATION_OF_CYCLIN_DEPENDENT_PROTEIN_KINASE_ACTIVITY	27	1.35692	0.0847176	0.149258
M5 GO Biological Process	GOBP_EXTRINSIC_APOPTOTIC_SIGNALING_PATHWAY_VIA_DEATH_DOMAIN_RECEPTORS	82	1.3566	0.0538462	0.149518
M2 Reactome pathway	REACTOME_GENERATION_OF_SECOND_MESSENGER_MOLECULES	23	1.35616	0.104796	0.149905
M2 Reactome pathway	REACTOME_HEME_DEGRADATION	18	1.35568	0.116487	0.150334
M5 GO Biological Process	GOBP_MATERNAL_PLACENTA_DEVELOPMENT	35	1.35544	0.0833333	0.150496
M5 GO Molecular Function	GOMF_TETRAPYRROLE_BINDING	146	1.35437	0.0200286	0.151465
M5 GO Molecular Function	GOMF_MAGNESIUM_ION_TRANSMEMBRANE_TRANSPORTER_ACTIVITY	15	1.3543	0.110507	0.151468
M5 GO Biological Process	GOBP_N_ACETYLGLUCOSAMINE_METABOLIC_PROCESS	16	1.3537	0.107584	0.151973
M5 GO Biological Process	GOBP_POSITIVE_REGULATION_OF_SMOOTH_MUSCLE_CONTRACTION	35	1.35355	0.0838816	0.152055
[truncated: 4,624 more rows]
